# Supplementary material for: Hydrolysis of amides to carboxylic acids catalyzed by Nb2O5
Source: Royal Society of Chemistry journal article supplement (doi:10.1039/d0cy02230f), 2021-01-01
Supplement: d0cy02230f1.pdf [file d0cy02230f1.pdf]

## Supporting Information

# Hydrolysis of Amides to Carboxylic Acids Catalyzed by Nb<sub>2</sub>O<sub>5</sub>

S. M. A. Hakim Siddiki,<sup>†\*</sup> Md. Nurnobi Rashed,<sup>†</sup> Abeda Sultana Touchy,<sup>†</sup> Md. A. R. Jamil,<sup>†</sup>  
Yuan Jing,<sup>†</sup> Takashi Toyao,<sup>†,‡</sup> Zen Maeno,<sup>†</sup> Ken-ichi Shimizu<sup>\*†,‡</sup>

<sup>†</sup> Institute for Catalysis, Hokkaido University, N-21, W-10, Sapporo 001-0021, Japan

<sup>‡</sup> Elements Strategy Initiative for Catalysts and Batteries, Kyoto University, Katsura, Kyoto  
615-8520, Japan.

\*Corresponding authors

S. M. A. Hakim Siddiki, Ken-ichi Shimizu

E-mail: hakim@cat.hokudai.ac.jp, kshimizu@cat.hokudai.ac.jp

## Experimental:

### General

Commercially available inorganic and organic compounds were purchased from TCI (Tokyo Chemical Industry), Sigma Aldrich, Wako Pure Chemical Industries, Kishida Chemical, or Mitsuwa Chemicals and were used without further purification. The GC (Shimadzu GC-14B) and GCMS (Shimadzu GCMS-QP2010) analyses were conducted using an Ultra ALLOY capillary column UA<sup>+</sup>-1 (Frontier Laboratories Ltd.) with N<sub>2</sub> and He as carrier gases. <sup>1</sup>H and <sup>13</sup>C NMR spectra were recorded at ambient temperature on JEOL-ECX 600 and 400 instruments operating at 600.17 and 150.92 MHz and at 395.88 and 99.54 MHz respectively with dimethyl sulfoxide (DMSO) as an internal standard.

### Catalyst preparation

Different Nb<sub>2</sub>O<sub>5</sub> samples were prepared by calcination of Nb<sub>2</sub>O<sub>5</sub>·*n*H<sub>2</sub>O (HY-340, provided by CBMM, Brazil) at 200 °C, 500 °C, 700 °C, and 1000 °C for 3h in air prior to use. CeO<sub>2</sub>, supplied from Daiichi Kigenso Kagaku Kogyo Co., Ltd (Type A), was calcined at 600 °C for 3 h. TiO<sub>2</sub> (JRC-TIO-8) and MgO (JRC-MGO-3) were supplied by the Catalysis Society of Japan. γ-Al<sub>2</sub>O<sub>3</sub> was prepared by calcination of γ-AlOOH (Catapal B Alumina, Sasol) at 900 °C for 3 h. SiO<sub>2</sub> (Q-10) was supplied by Fuji Silysia Chemical Ltd. ZnO was prepared by calcination (*T* = 500 °C, *t* = 3 h) of Zn(OH)<sub>2</sub> (Kishida Chemical). ZrO<sub>2</sub> was prepared by calcining Zr(OH)<sub>4</sub> at 773 K for 3 h, which was made *via* hydrolysis of Y(NO<sub>3</sub>)<sub>3</sub>·6H<sub>2</sub>O, ZrO(NO<sub>3</sub>)<sub>2</sub>·2H<sub>2</sub>O with an aqueous NH<sub>4</sub>OH solution. SnO<sub>2</sub> was prepared from H<sub>2</sub>SnO<sub>3</sub> (Kojundo Chemical Laboratory Co., Ltd.) by calcination at 500 °C for 3 h. CaO was prepared by calcination of Ca(OH)<sub>2</sub> (Kanto Chemical) at 500 °C for 3 h. La<sub>2</sub>O<sub>3</sub>, Ce(NO<sub>3</sub>)<sub>4</sub>, *p*-toluenesulfonic acid, and H<sub>2</sub>SO<sub>4</sub> were supplied by Wako Pure Chemical Industries, Japan. The Sc(OTf)<sub>3</sub> (>98%) was obtained from TCI Co. Ltd., and Zr(SO<sub>4</sub>)<sub>4</sub>·4H<sub>2</sub>O (≥99%) was supplied from Alfa Aesar, Ward Hill, China. Montmorillonite K10 clay (mont. K10), sulfonic resin Nafion-SiO<sub>2</sub> composite, and ammonium niobate(V) oxalate hydrate (C<sub>4</sub>H<sub>4</sub>NNbO<sub>9</sub>·*x*H<sub>2</sub>O) were purchased from Sigma-Aldrich.

### Catalyst characterization

X-ray diffraction (XRD; Rigaku MiniFlex) patterns of the powdered catalysts were recorded using Cu-Kα radiation ( $\lambda = 1.5418 \text{ \AA}$ ). The N<sub>2</sub> adsorption measurements were obtained over AUTOSORB 6AG (Yuasa Ionics Co.). X-ray photoelectron spectroscopy (XPS) of the catalysts was performed using a JEOL JPS-9010MC spectrometer (Mg-Kα irradiation). Binding energies were calibrated with respect to C<sub>1s</sub> at 285.0 eV. Inductively coupled plasma-atomic emission spectroscopy (ICP-AES) analysis was done with a Shimadzu ICPE-9000 instrument to investigate the heterogeneous nature of Nb<sub>2</sub>O<sub>5</sub> catalysts.

## IR studies

*In situ* IR spectra were recorded using a JASCO FT/IR-4200 with an MCT (mercury-cadmium-telluride) detector. The Nb<sub>2</sub>O<sub>5</sub> sample (40 mg) was pressed to obtain a self-supporting pellet ( $\phi = 2$  cm), which was placed in the quartz IR cell with CaF<sub>2</sub> windows connected to a conventional gas flow system. Spectra were obtained by accumulating 15 scans at a resolution of 4 cm<sup>-1</sup>. A reference spectrum taken at the adsorption measurement temperature (120 °C) under He flow was subtracted from each spectrum.

For acetamide adsorption experiments, the sample pellet was heated under He flow (100 cm<sup>3</sup> min<sup>-1</sup>) at 300 °C for 0.5 h prior to the measurement. After cooling to 120 °C under the He flow, 1  $\mu$ L acetamide was injected into each sample through a line which was preheated at ca. 200 °C to vaporize it.

For pyridine adsorption experiments, the sample was activated at 200 °C for 0.5 h under He flow (100 cm<sup>3</sup> min<sup>-1</sup>) and then cooled down to 120 °C. Subsequently, 1  $\mu$ L pyridine was introduced. The amount of adsorbed probe molecule was determined using the integrated area of bands typical of the coordinated (Lewis) or protonated (Brønsted) forms at 1445 and 1540 cm<sup>-1</sup>, respectively, using previously determined molar absorption coefficients.<sup>1</sup>

## Typical procedure for catalytic reactions

Amide **1a** (1 mmol), water (5 mmol), and a magnetic stirrer bar were placed in a reaction tube followed by addition of N<sub>2</sub> through the septum inlet. The standard amount of catalyst used was 50 mg. The temperature controller was set at 120 °C to maintain reflux conditions during the reaction. Yields of products were determined by GC with *n*-dodecane as the internal standard. GC sensitivities were estimated using commercial compounds or isolated products. In substrate scope studies, products were isolated using column chromatography on silica gel 60 (spherical, 40–100  $\mu$ m, Kanto Chemical Co. Ltd.) using hexane/ethyl acetate (10:1 to 16:1, v/v) as the eluting solvent, followed by <sup>1</sup>H and <sup>13</sup>C NMR spectroscopy in combination with GC-MS equipped with the same column as that used for GC-FID analyses. For recycling experiments, after each catalytic cycle, 2-propanol (3 mL) was added into the reaction mixture. The catalyst was separated and washed twice with acetone (3 mL) followed by water (3 mL). The catalyst was then dried at 110 °C for 5 h and used.

### Supplementary results:

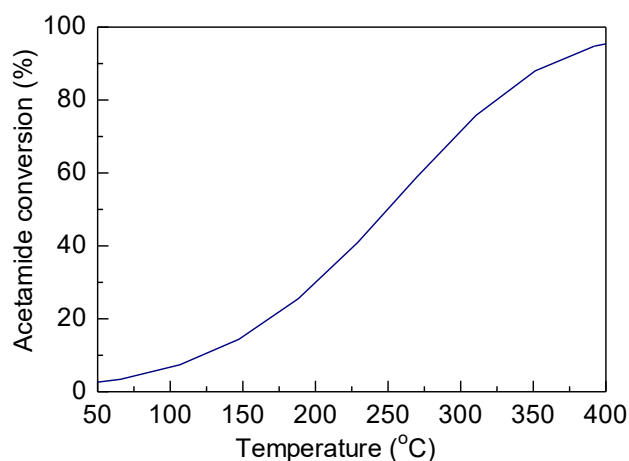

**Figure S1.** Thermodynamic equilibrium of acetamide conversion in hydrolysis of acetamide to acetic acid calculated using HSC Chemistry 9.0 software. The reaction  $C_2H_5NO + H_2O(l) = C_2H_4O_2(a) + NH_3(a)$  was examined with a water/acetamide ratio = 5.

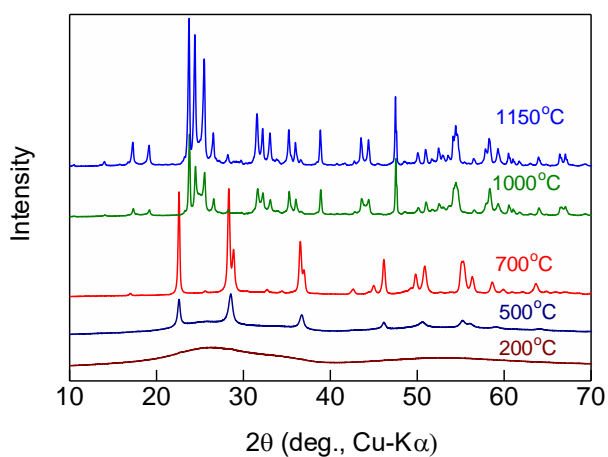

**Figure S2.** XRD patterns of  $Nb_2O_5$  catalysts calcined at different temperatures.

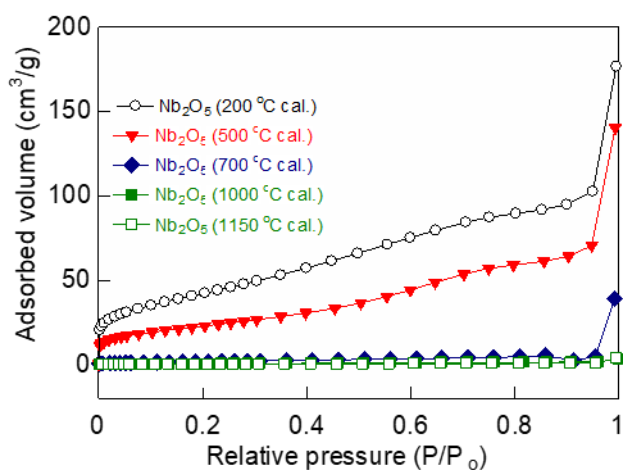

**Figure S3.**  $N_2$  adsorption isotherms of  $Nb_2O_5$  catalysts calcined at different temperatures.

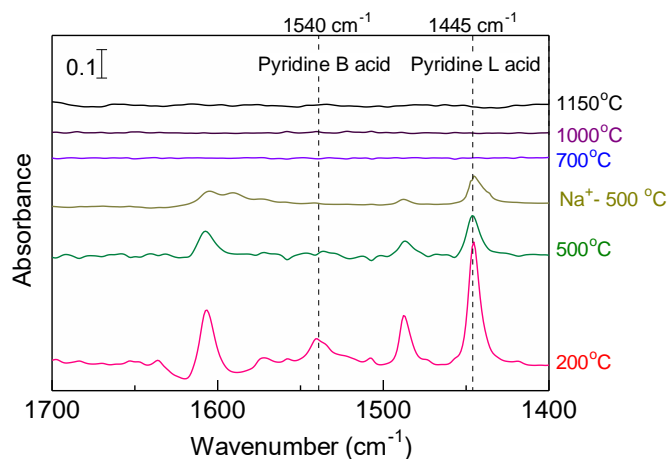

**Figure S4.** IR spectra of pyridine adsorption on  $\text{Nb}_2\text{O}_5$  catalysts calcined at different temperatures. The spectra were measured at 200 °C.

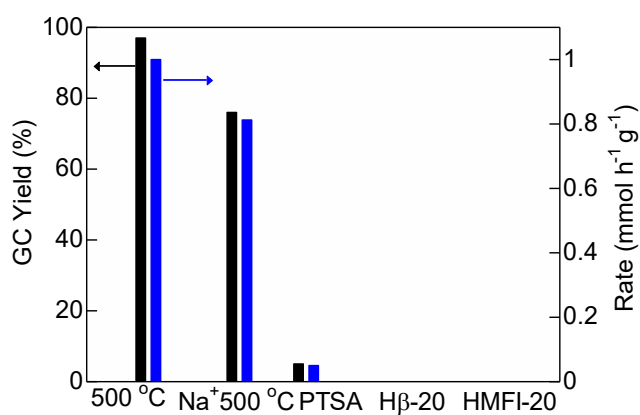

**Figure S5.** Comparison of the role of Lewis and Brønsted acid sites of catalysts on hydrolysis of acetamide. Reaction conditions: acetamide 1 mmol, water 5 mmol, catalysts 50 mg,  $T = 120\text{ °C}$ ,  $t = 20\text{ h}$  (final yield determination), 2 h (initial rate determination).

### NMR and GC/MS analyses:

$^1\text{H}$  and  $^{13}\text{C}$  NMR spectra of the products were assigned and confirmed by literature values.  $^1\text{H}$  and  $^{13}\text{C}$  NMR spectra were recorded at ambient temperature on a JEOL-ECX 600 instrument operating at 600.17 MHz and 150.92 MHz, respectively, and a JEOL-ECX 400-2 instrument operating at 399.78 MHz and 100.52 MHz, respectively. Abbreviations used in the NMR experiments: s, singlet; d, doublet; t, triplet; q, quartet; m, multiplet. GC-MS spectra were obtained using a Shimadzu QP2010 instrument.

### Acetic acid:<sup>2</sup>

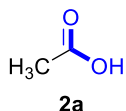

Yield 91%;  $^1\text{H}$  NMR (600.17 MHz, DMSO- $d_6$ ):  $\delta$  11.94 (s, 1H), 1.89 (s, 3H);  $^{13}\text{C}$  NMR (150.92 MHz, DMSO- $d_6$ )  $\delta$  172.18, 21.12; GC-MS  $m/z$ : 60.05.

### Propionic acid:<sup>3</sup>

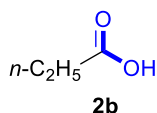

Yield 90%;  $^1\text{H}$  NMR (600.17 MHz, DMSO- $d_6$ ):  $\delta$  11.95 (s, 1H), 2.22-2.18 (m, 2H), 0.98 (t,  $J=7.56$  Hz, 3H);  $^{13}\text{C}$  NMR (150.92 MHz, DMSO- $d_6$ )  $\delta$  175.27, 26.94, 9.13; GC-MS  $m/z$ : 74.05.

### Hexanoic acid:<sup>4</sup>

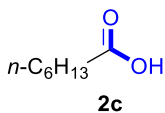

Yield 84%;  $^1\text{H}$  NMR (600.17 MHz, DMSO- $d_6$ ):  $\delta$  11.96 (s, 1H), 2.18 (t,  $J=7.56$  Hz, 2H), 1.51-1.42 (m, 2H), 1.32-1.19 (m, 4H), 0.85 (t,  $J=7.08$  Hz, 3H);  $^{13}\text{C}$  NMR (150.92 MHz, DMSO- $d_6$ )  $\delta$  174.52, 33.65, 30.80, 24.21, 21.87, 13.84; GC-MS  $m/z$ : 116.15.

### Tetradecanoic acid:<sup>5</sup>

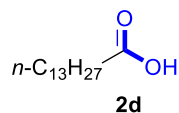

Yield 77%;  $^1\text{H}$  NMR (600.17 MHz, DMSO- $d_6$ ):  $\delta$  11.96 (s, 1H), 2.17 (t,  $J=7.56$  Hz, 2H), 1.48-1.42 (m, 2H), 1.29-1.19 (m, 20H), 0.85 (t,  $J=7.05$  Hz, 3H);  $^{13}\text{C}$  NMR (150.92 MHz, DMSO- $d_6$ )  $\delta$  174.50, 33.67, 31.31, 30.81, 29.03 (C $\times$ 2), 28.92, 28.75, 28.72 (C $\times$ 2), 28.56, 24.50, 22.11, 13.96; GC-MS  $m/z$ : 228.35.

### Heptadecanoic acid:<sup>6</sup>

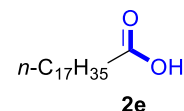

Yield 86%;  $^1\text{H}$  NMR (600.17 MHz, DMSO- $d_6$ ):  $\delta$  11.68 (s, 1H), 2.18 (t,  $J$ =7.56 Hz, 2H), 1.54-1.49 (m, 2H), 1.34-1.19 (m, 28H), 0.86 (t,  $J$ =6.87 Hz, 3H);  $^{13}\text{C}$  NMR (150.92 MHz, DMSO- $d_6$ )  $\delta$  173.85, 33.40, 30.90, 30.80, 28.61 (C $\times$ 2), 28.49 (C $\times$ 2), 28.31 (C $\times$ 2), 28.26 (C $\times$ 2), 28.21 (C $\times$ 2), 24.17, 21.65, 13.42; GC-MS  $m/z$ : 270.45.

### Phenylacetic acid:<sup>7</sup>

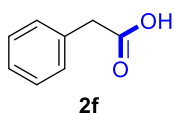

Yield 88%;  $^1\text{H}$  NMR (600.17 MHz, DMSO- $d_6$ ):  $\delta$  11.32 (s, 1H), 7.30 (t,  $J$ =7.44 Hz, 2H), 7.27-7.21 (m, 3H), 3.56 (s, 2H);  $^{13}\text{C}$  NMR (150.92 MHz, DMSO- $d_6$ )  $\delta$  172.75, 135.06, 129.40 (C $\times$ 2), 128.26 (C $\times$ 2), 126.61, 40.72; GC-MS  $m/z$ : 136.15.

### 3-Phenyl-acrylic acid:<sup>8</sup>

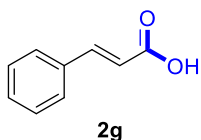

Yield 84%;  $^1\text{H}$  NMR (600.17 MHz, DMSO- $d_6$ ):  $\delta$  11.46 (s, 1H), 7.65 (t,  $J$ =8.22 Hz, 2H), 7.62 (t,  $J$ =8.12 Hz, 1H), 7.40-7.361 (m, 3H), 6.54 (t,  $J$ =8.012 Hz, 1H);  $^{13}\text{C}$  NMR (150.92 MHz, DMSO- $d_6$ )  $\delta$  167.80, 144.09, 134.39, 130.32, 129.02 (C $\times$ 2), 128.31 (C $\times$ 2), 119.38; GC-MS  $m/z$ : 148.15.

### 2-(Naphthalen-1-yl)acetic acid:<sup>8</sup>

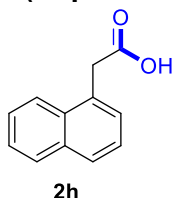

Yield 83%;  $^1\text{H}$  NMR (600.17 MHz, DMSO- $d_6$ ):  $\delta$  12.43 (s, 1H), 7.97 (d,  $J$ =8.10 Hz, 1H), 7.92 (d,  $J$ =8.04 Hz, 1H), 7.84 (d,  $J$ =8.04 Hz, 1H), 7.58-7.351 (m, 2H), 7.48-7.34 (m, 2H), 4.04 (s, 2H);  $^{13}\text{C}$  NMR (150.92 MHz, DMSO- $d_6$ )  $\delta$  172.78, 133.34, 131.89, 131.69, 128.46, 128.01, 127.40, 126.18, 125.72, 125.54, 124.04, 38.50; GC-MS  $m/z$ : 186.20.

### Cyclohexanecarboxylic acid:<sup>5</sup>

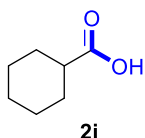

Yield 95%;  $^1\text{H}$  NMR (600.17 MHz, DMSO- $d_6$ ):  $\delta$  11.94 (s, 1H), 2.20-2.15 (m, 1H), 1.82-1.76 (m, 2H), 1.68-1.62 (m, 2H), 1.59-1.531 (m, 2H), 1.33-1.14 (m, 5H);  $^{13}\text{C}$  NMR (150.92 MHz, DMSO- $d_6$ )  $\delta$  176.75,

42.28, 28.73, 25.52 (C×2), 25.01 (C×2); GC-MS m/z: 128.15.

### 2-Hydroxypropanoic acid:<sup>9</sup>

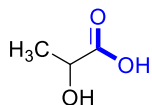

2j

Yield 88%; <sup>1</sup>H NMR (600.17 MHz, DMSO-d<sub>6</sub>): δ 12.35 (br s, 1H), 5.24 (br s, 1H), 4.09-4.05 (m, 1H), 1.26 (d, *J* = 6.60 Hz, 3H); <sup>13</sup>C NMR (150.92 MHz, DMSO-d<sub>6</sub>) δ 177.42, 66.83, 21.51; GC-MS m/z: 90.10.

### Propionic acid:<sup>10</sup>

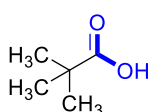

2k

Yield 91%; <sup>1</sup>H NMR (600.17 MHz, DMSO-d<sub>6</sub>): δ 12.01 (br s, 1H), 1.10 (s, 9H); <sup>13</sup>C NMR (150.92 MHz, DMSO-d<sub>6</sub>) δ 179.37, 37.92, 27.01 (C×3); GC-MS m/z: 102.15.

### Adamantane-1-carboxylic acid:<sup>11</sup>

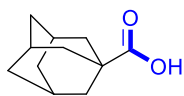

2l

Yield 83%; <sup>1</sup>H NMR (600.17 MHz, DMSO-d<sub>6</sub>): δ 11.97 (s, 1H), 1.94 (br s, 9H), 1.78 (s, 6H), 1.68-1.62 (m, 5H); <sup>13</sup>C NMR (150.92 MHz, DMSO-d<sub>6</sub>) δ 178.44, 38.49 (C×4), 36.04 (C×3), 30.71 (C×2), 27.38; GC-MS m/z: 180.25.

### Malonic acid:<sup>12</sup>

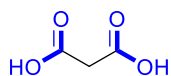

2m

Yield 82%; <sup>1</sup>H NMR (600.17 MHz, DMSO-d<sub>6</sub>): δ 12.60 (br s, 2H), 3.23 (s, 2H); <sup>13</sup>C NMR (150.92 MHz, DMSO-d<sub>6</sub>) δ 168.50 (C×2), 41.99; GC-MS m/z: 104.05.

Note: Amides **1n-1r** generate acetic acid **2a** as the corresponding hydrolyzed product shown in Scheme 2.

### Benzoic acid:<sup>11</sup>

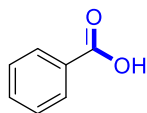

4a



Yield 87%;  $^1\text{H}$  NMR (600.17 MHz, DMSO- $d_6$ ):  $\delta$  12.96 (s, 1H), 7.94 (d,  $J$  =8.04 Hz, 2H), 7.61 (t,  $J$  =6.87 Hz, 2H), 7.49 (t,  $J$  =6.87 Hz, 2H);  $^{13}\text{C}$  NMR (150.92 MHz, DMSO- $d_6$ )  $\delta$  167.50, 133.02, 130.93, 129.44 (C $\times$ 2), 128.73 (C $\times$ 2); GC-MS  $m/z$ : 122.10.

#### 4-Methylbenzoic acid:<sup>12</sup>

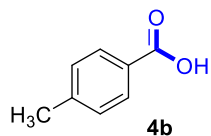

Yield 80%;  $^1\text{H}$  NMR (600.17 MHz, DMSO- $d_6$ ):  $\delta$  12.79 (s, 1H), 7.83 (d,  $J$  =7.68 Hz, 2H), 7.26 (d,  $J$  =7.68 Hz, 2H), 2.34 (s, 3H);  $^{13}\text{C}$  NMR (150.92 MHz, DMSO- $d_6$ )  $\delta$  167.41, 143.08, 129.41, 129.17, 128.12 (C $\times$ 2), 21.17; GC-MS  $m/z$ : 136.15.

#### 3-Methylbenzoic acid:<sup>5</sup>

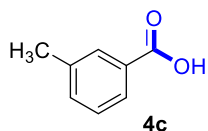

Yield 76%;  $^1\text{H}$  NMR (600.17 MHz, DMSO- $d_6$ ):  $\delta$  10.83 (s, 1H), 8.28 (d,  $J$  =8.22 Hz, 2H), 7.94 (d,  $J$  =8.14 Hz, 2H), 1.73 (s, 9H);  $^{13}\text{C}$  NMR (150.92 MHz, DMSO- $d_6$ )  $\delta$  167.42, 137.90, 133.46, 130.74, 129.74, 128.46, 126.46, 20.82; GC-MS  $m/z$ : 136.15.

#### 4-*tert*-Butylbenzoic acid:<sup>13</sup>

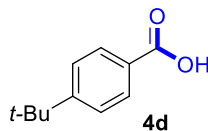

Yield 77%;  $^1\text{H}$  NMR (600.17 MHz, DMSO- $d_6$ ):  $\delta$  12.87 (s, 1H), 7.761 (d,  $J$  =8.10 Hz, 2H), 6.53 (d,  $J$  =8.10 Hz, 2H), 5.86 (br s, 2H);  $^{13}\text{C}$  NMR (150.92 MHz, DMSO- $d_6$ )  $\delta$  166.27, 155.21, 130.37 (C $\times$ 2), 127.83, 125.82 (C $\times$ 2), 35.23, 31.44 (C $\times$ 3); GC-MS  $m/z$ : 178.25.

#### 4-Aminobenzoic acid:<sup>14</sup>

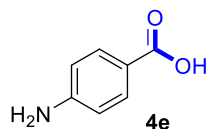

Yield 81%;  $^1\text{H}$  NMR (600.17 MHz, DMSO- $d_6$ ):  $\delta$  11.96 (br s, 1H), 7.79-7.71 (m, 2H), 7.42 (d,  $J$  =7.32 Hz, 1H), 7.39-7.34 (m, 1H), 2.35 (s, 3H);  $^{13}\text{C}$  NMR (150.92 MHz, DMSO- $d_6$ )  $\delta$  166.59, 153.21, 131.31(C $\times$ 2), 116.93, 112.63 (C $\times$ 2); GC-MS  $m/z$ : 137.15.

#### 4-Hydroxybenzoic acid:<sup>15</sup>

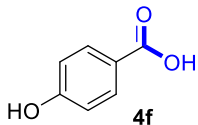

Yield 83%;  $^1\text{H}$  NMR (600.17 MHz, DMSO- $d_6$ ):  $\delta$  12.48 (br s, 1H), 10.27 (br s, 1H), 7.83 (d,  $J$  = 8.28 Hz, 2H), 6.85 (d,  $J$  = 8.28 Hz, 2H);  $^{13}\text{C}$  NMR (150.92 MHz, DMSO- $d_6$ )  $\delta$  168.17, 162.58, 132.53, 122.32, 116.10; GC-MS  $m/z$ : 137.10.

### 2-Hydroxybenzoic acid:<sup>15</sup>

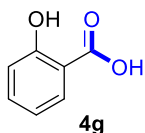

Yield 81%;  $^1\text{H}$  NMR (600.17 MHz, DMSO- $d_6$ ):  $\delta$  14.00 (br s, 1H), 11.30 (br s, 1H), 7.78 (d,  $J$  = 6.85 Hz, 1H), 7.52-7.48 (m, 1H), 6.96-7.91 (m, 2H);  $^{13}\text{C}$  NMR (150.92 MHz, DMSO- $d_6$ )  $\delta$  171.95, 161.14, 135.69, 130.28, 119.21, 117.11, 112.66; GC-MS  $m/z$ : 137.10.

### 3-Fluorobenzoic acid:<sup>16</sup>

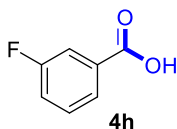

Yield 80%;  $^1\text{H}$  NMR (600.17 MHz, DMSO- $d_6$ ):  $\delta$  13.29 (br s, 1H), 7.77 (d,  $J$  = 7.08 Hz, 1H), 7.64 (d,  $J$  = 8.22 Hz, 1H), 7.57-7.51 (m, 1H), 7.46 (t,  $J$  = 7.56 Hz, 1H);  $^{13}\text{C}$  NMR (150.92 MHz, DMSO- $d_6$ )  $\delta$  166.25, 162.02 (d,  $J$  = 244.20 Hz), 133.30 (d,  $J$  = 6.03 Hz), 130.82 (d,  $J$  = 6.03 Hz), 125.48, 119.89 (d,  $J$  = 20.23 Hz), 115.79 (d,  $J$  = 22.63 Hz); GC-MS  $m/z$ : 140.10.

### 4-Fluorobenzoic acid:<sup>16</sup>

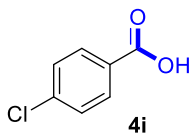

Yield 84%;  $^1\text{H}$  NMR (600.17 MHz, DMSO- $d_6$ ):  $\delta$  13.17 (br s, 1H), 7.92 (d,  $J$  = 8.07 Hz, 2H), 7.52 (d,  $J$  = 8.07 Hz, 2H);  $^{13}\text{C}$  NMR (150.92 MHz, DMSO- $d_6$ )  $\delta$  166.53, 137.87, 131.19, 129.69, 128.77 (C $\times$ 2); GC-MS  $m/z$ : 156.55.

### 4-Methoxybenzoic acid:<sup>12</sup>

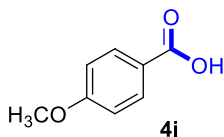

Yield 83%;  $^1\text{H}$  NMR (600.17 MHz, DMSO- $d_6$ ):  $\delta$  12.62 (s, 1H), 7.85 (d,  $J$  = 8.75 Hz, 2H), 7.00 (d,  $J$  = 8.75 Hz, 2H), 3.82 (s, 3H);  $^{13}\text{C}$  NMR (150.92 MHz, DMSO- $d_6$ )  $\delta$  167.01, 162.85, 131.36 (C $\times$ 2), 122.83, 113.82 (C $\times$ 2), 55.45; GC-MS  $m/z$ : 152.15.

### 3-(Trifluoromethyl)benzoic acid:<sup>17</sup>

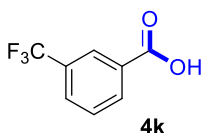

Yield 84%;  $^1\text{H}$  NMR (600.17 MHz, DMSO- $d_6$ ):  $\delta$  13.54 (s, 1H), 8.21 (d,  $J=7.02$  Hz, 1H), 8.16 (s, 1H), 7.97 (d,  $J=8.10$  Hz, 1H), 7.74 (d,  $J=7.56$  Hz, 1H), 3.82 (s, 3H);  $^{13}\text{C}$  NMR (150.92 MHz, DMSO- $d_6$ )  $\delta$  166.06, 133.23, 132.04, 130.07, 129.46(d,  $J=24.14$  Hz), 129.35 (d,  $J=4.33$  Hz), 125.54 (d,  $J=4.33$  Hz), 123.83 (d,  $J=271.65$  Hz); GC-MS m/z: 190.10

#### 4-Nitrobenzoic acid:<sup>5</sup>

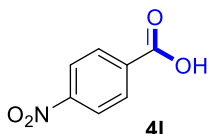

Yield 76%;  $^1\text{H}$  NMR (600.17 MHz, DMSO- $d_6$ ):  $\delta$  13.66 (s, 1H), 8.30 (d,  $J=7.98$  Hz, 1H), 8.15 (d,  $J=7.98$  Hz, 1H);  $^{13}\text{C}$  NMR (150.92 MHz, DMSO- $d_6$ )  $\delta$  166.83, 150.05, 136.38, 130.72 (C $\times$ 2), 123.74 (C $\times$ 2); GC-MS m/z: 167.10.

#### Naphthalen-2-carboxylic acid:<sup>16</sup>

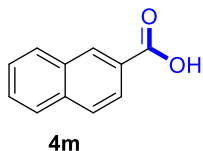

Yield 86%;  $^1\text{H}$  NMR (600.17 MHz, DMSO- $d_6$ ):  $\delta$  13.10 (br s, 1H), 8.61 (s, 1H), 8.10 (d,  $J=7.98$  Hz, 1H), 8.01-7.94 (m, 3 H), 7.64 (t,  $J=7.44$  Hz, 1H), 7.59 (d,  $J=7.44$  Hz, 1H), 7.57 (t,  $J=7.56$  Hz, 1H);  $^{13}\text{C}$  NMR (150.92 MHz, DMSO- $d_6$ )  $\delta$  167.49, 134.96, 132.18, 130.56, 129.31, 128.35, 128.20, 128.10 (C $\times$ 2), 127.68 (C $\times$ 2), 126.84, 125.20; GC-MS m/z: 172.15.

#### Naphthalen-1-carboxylic acid:<sup>11</sup>

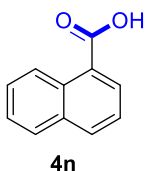

Yield 82%;  $^1\text{H}$  NMR (600.17 MHz, DMSO- $d_6$ ):  $\delta$  13.15 (br s, 1H), 8.85 (d,  $J=7.98$  Hz, 1H), 8.14 (d,  $J=6.90$  Hz, 2H), 8.01 (d,  $J=6.84$  Hz, 1H), 7.63 (t,  $J=7.22$  Hz, 1H), 7.58 (d,  $J=7.82$  Hz, 2H);  $^{13}\text{C}$  NMR (150.92 MHz, DMSO- $d_6$ )  $\delta$  168.66, 133.47, 132.95, 130.68, 129.87, 128.62, 127.52, 126.20, 124.89; GC-MS m/z: 172.15.

#### Nicotinic acid:<sup>16</sup>

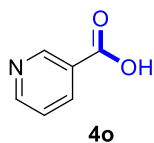

Yield 83%;  $^1\text{H}$  NMR (600.17 MHz, DMSO- $d_6$ ):  $\delta$  13.43 (br s, 1H), 8.77 (d,  $J=7.56$  Hz, 1H), 8.25 (d,  $J=8.04$  Hz, 1H), 7.52 (t,  $J=8.04$  Hz, 1H);  $^{13}\text{C}$  NMR (150.92 MHz, DMSO- $d_6$ )  $\delta$  166.34, 153.32, 150.29, 137.02, 126.63, 123.85; GC-MS m/z: 123.10.

### Thiophene-2-carboxylic acid:<sup>18</sup>

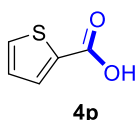

Yield 85%; <sup>1</sup>H NMR (600.17 MHz, DMSO-d<sub>6</sub>): δ 13.04 (br s, 1H), 7.90-7.86 (m, 1H), 7.72 (d, *J* = 7.02 Hz, 1H), 7.18 (t, *J* = 6.54 Hz, 1H); <sup>13</sup>C NMR (150.92 MHz, DMSO-d<sub>6</sub>) δ 162.94, 134.67, 133.30, 133.25, 128.25; GC-MS *m/z*: 128.15.

### Furan-2-carboxylic acid:<sup>19</sup>

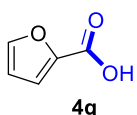

Yield 85%; <sup>1</sup>H NMR (600.17 MHz, DMSO-d<sub>6</sub>): δ 13.08 (br s, 1H), 7.94 (s, 1H), 7.24 (d, *J* = 4.14 Hz, 1H), 6.68-6.67 (m, 1H); <sup>13</sup>C NMR (150.92 MHz, DMSO-d<sub>6</sub>) δ 160.32, 148.05, 145.88, 118.72, 113.10; GC-MS *m/z*: 112.10.

### Terephthalic acid:<sup>20</sup>

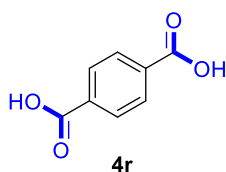

Yield 83%; <sup>1</sup>H NMR (600.17 MHz, DMSO-d<sub>6</sub>): δ 13.29 (br s, 2H), 8.05 (s, 4H); <sup>13</sup>C NMR (150.92 MHz, DMSO-d<sub>6</sub>) δ 166.74 (C×2), 134.50 (C×2), 129.53 (C×4); GC-MS *m/z*: 166.15.

Note: Amides **3s-3w** generate benzoic acid **4a** as the corresponding hydrolyzed product shown in section (B) of Scheme 4.

## REFERENCES

- 1 M. Tamura, K. Shimizu and A. Satsuma, *Applied Catal. A, Gen.*, 2012, **433-434**, 135-145.
- 2 Q. J. Yan, S. Q. Yang, X. J. Duan, H. B. Xu, Y. Liu and Z. Q. Jiang, *J. Mol. Catal. B Enzym.*, 2014, **109**, 76-84.
- 3 Y. Hirai, T. Kojima, Y. Mizutani, Y. Shiota, K. Yoshizawa and S. Fukuzumi, *Angew. Chemie*, 2008, **120**, 5856-5860.
- 4 H. Tsunoyama, T. Tsukuda and H. Sakurai, *Chem. Lett.*, 2007, **36**, 212-213.
- 5 A. T. Murray, P. Matton, N. W. G. Fairhurst, M. P. John and D. R. Carbery, *Org. Lett.*, 2012, **14**, 3656-3659.
- 6 O. Itsenko and B. Långström, *J. Org. Chem.*, 2005, **70**, 2244-2249.
- 7 J. C. Lee, E. S. Yoo and J. S. Lee, *Synth. Commun.*, 2004, **34**, 3017-3020.
- 8 T. Osako, R. Kaiser, K. Torii and Y. Uozumi, *Synlett*, 2019, **30**, 961-966.
- 9 S. M. A. H. Siddiki, A. S. Touchy, K. Kon, T. Toyao and K. Shimizu, *ChemCatChem*, 2017, **9**, 2816-2821.
- 10 C. J. Salomon, E. G. Mata and O. A. Mascaretti, *J. Org. Chem.*, 1994, **59**, 7259-7266.
- 11 V. Cherepakhin and T. J. Williams, *ACS Catal.*, 2018, **8**, 3754-3763.

- 12 S. M. A. H. Siddiki, T. Toyao, K. Kon, A. S. Touchy and K. Shimizu, *J. Catal.*, 2016, **344**, 741–748.
- 13 K. Lee, Y. H. Kim, S. B. Han, H. Kang, S. Park, W. S. Seo, J. T. Park, B. Kim and S. Chang, *J. Am. Chem. Soc.*, 2003, **125**, 6844–6845.
- 14 C. Wiles, P. Watts and S. J. Haswell, *Tetrahedron Lett.*, 2006, **47**, 5261–5264.
- 15 D. Sang, C. Yi, Z. He, J. Wang, J. Tian, M. Yao and H. Shi, *Tetrahedron Lett.*, 2018, **59**, 1469–1472.
- 16 H. M. Liu, L. Jian, C. Li, C. C. Zhang, H. Y. Fu, X. L. Zheng, H. Chen and R. X. Li, *J. Org. Chem.*, 2019, **84**, 9151–9160.
- 17 N. Iqbal, S. Choi, Y. You and E. J. Cho, *Tetrahedron Lett.*, 2013, **54**, 6222–6225.
- 18 L. Han, P. Xing and B. Jiang, *Org. Lett.*, 2014, **16**, 3428–3431.
- 19 P. Sathyanarayana, A. Upare, O. Ravi, P. R. Muktapuram and S. R. Bathula, *RSC Adv.*, 2016, **6**, 22749–22753.
- 20 T. Nakai, T. Iwai, M. Mihara, T. Ito and T. Mizuno, *Tetrahedron Lett.*, 2010, **51**, 2225–2227.

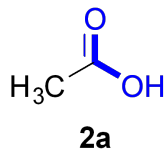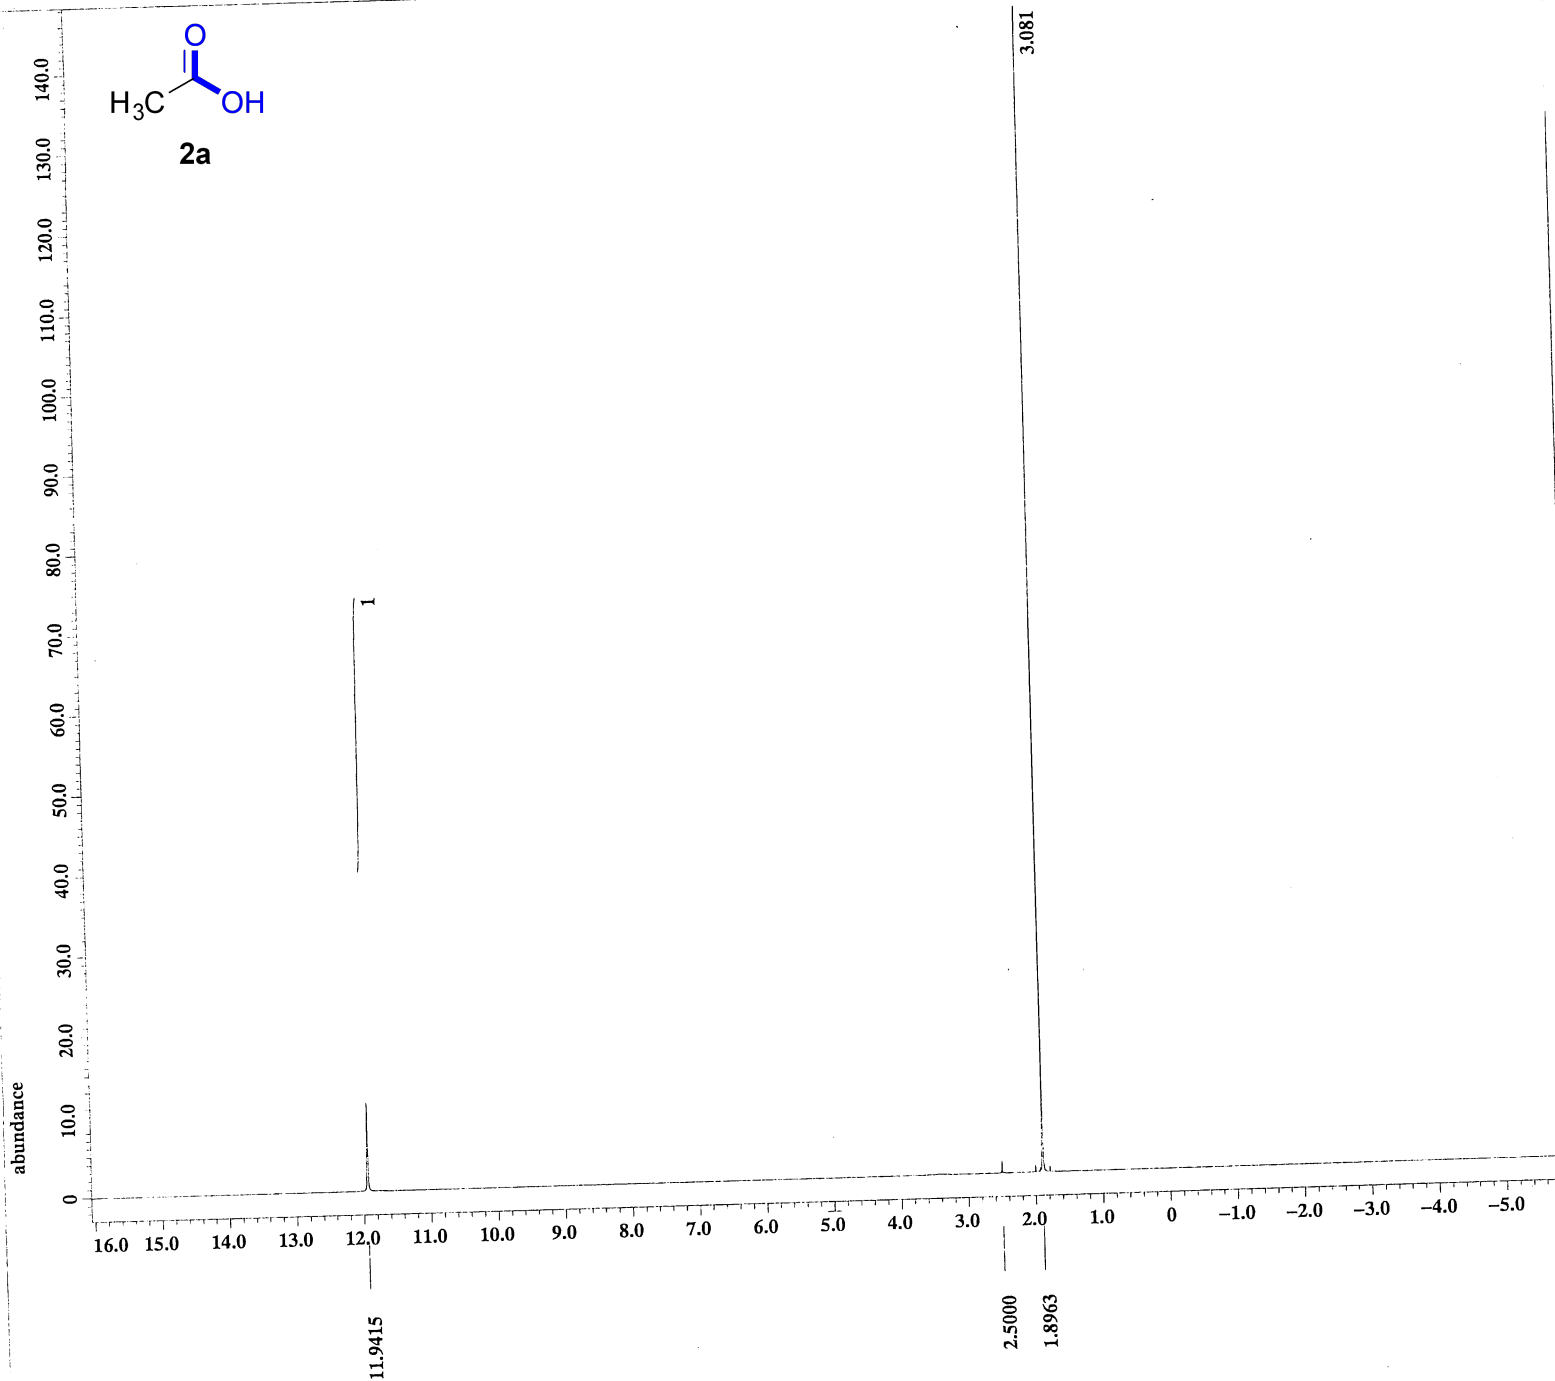

```

Filename      = Exp-R-124-27a-P-3.jdf
Author       = delta
Experiment   = single_pulse.ex2
Sample_id    = Exp-R-124-27a-P
Solvent      = DMSO-D6
Creation_time = 29-AUG-2018 19:16:17
Revision_time = 29-AUG-2018 19:21:04
Current_time = 29-AUG-2018 19:21:08
  
```

```

Content      = Exp-R-124-27a-P
Data_format  = 1D COMPLEX
Dim_size     = 13107
Dim_title    = 1H
Dim_units    = [ppm]
Dimensions   = X
Site         = ECA 600
Spectrometer = DELTA2_NMR
  
```

```

Field_strength = 14.09636928[T] (600[M]
X_acq_duration = 0.99090432[s]
X_domain       = 1H
X_freq         = 600.1723046[MHz]
X_offset       = 5[ppm]
X_points       = 16384
X_prescans     = 1
X_resolution   = 1.00917917[Hz]
X_sweep        = 16.53439153[kHz]
Irr_domain     = 1H
Irr_freq       = 600.1723046[MHz]
Irr_offset     = 5[ppm]
Tri_domain     = 1H
Tri_freq       = 600.1723046[MHz]
Tri_offset     = 5[ppm]
Clipped        = FALSE
Mod_return     = 1
Scans          = 8
Total_scans    = 8
  
```

```

X_90_width    = 12.68[us]
X_acq_time     = 0.99090432[s]
X_angle        = 45[deg]
X_atn          = 3.4[dB]
X_pulse        = 6.34[us]
Irr_mode       = Off
Tri_mode       = Off
Dante_presat   = FALSE
Initial_wait   = 1[s]
Recvr_gain     = 40
Relaxation_delay = 5[s]
Repetition_time = 5.99090432[s]
Temp_get       = 21.3[dC]
  
```

X : parts per Million : 1H

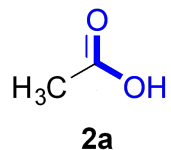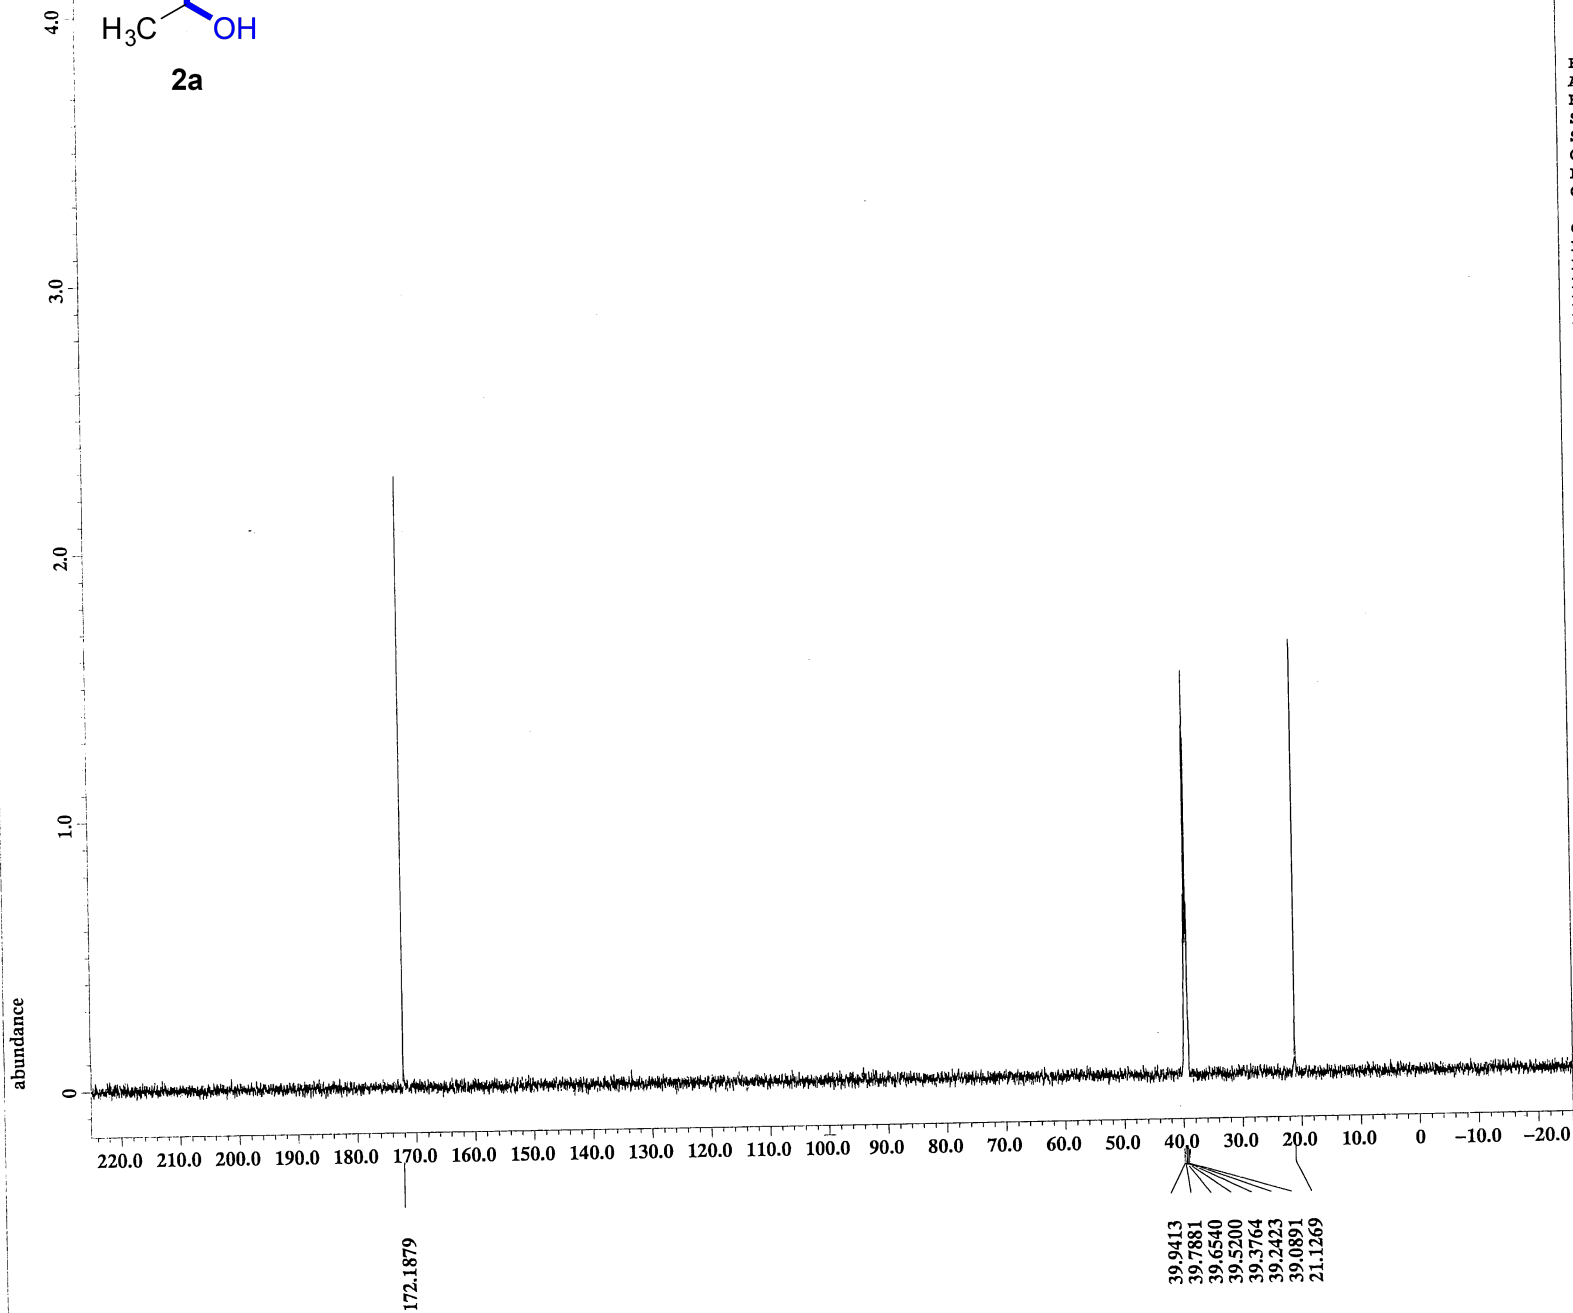

X : parts per Million : 13C

```

Filename      = Exp-R-124-27a-C-3.jdf
Author       = delta
Experiment   = single_pulse_dec
Sample_id    = Exp-R-124-27a-C
Solvent      = DMSO-D6
Creation_time = 29-AUG-2018 19:19:40
Revision_time = 29-AUG-2018 19:21:51
Current_time  = 29-AUG-2018 19:22:01

Content      = Exp-R-124-27a-C
Data_format  = 1D_COMPLEX
Dim_size     = 26214
Dim_title    = 13C
Dim_units    = [ppm]
Dimensions   = X
Site         = ECA 600
Spectrometer = DELTA2_NMR

Field_strength = 14.09636928[T] (600[M]
X_acq_duration = 0.69206016[s]
X_domain       = 13C
X_freq         = 150.91343039[MHz]
X_offset       = 100[ppm]
X_points       = 32768
X_prescans     = 4
X_resolution   = 1.44496109[Hz]
X_sweep        = 47.34848485[kHz]
Irr_domain     = 1H
Irr_freq       = 600.1723046[MHz]
Irr_offset     = 5[ppm]
Clipped        = FALSE
Mod_return     = 1
Scans          = 48
Total_scans    = 48

X_90_width     = 12[us]
X_acq_time     = 0.69206016[s]
X_angle        = 30[deg]
X_atn          = 7.5[dB]
X_pulse        = 4[us]
Irr_atn_dec    = 18.95[dB]
Irr_atn_noe    = 18.95[dB]
Irr_noise      = WALTZ
Decoupling     = TRUE
Initial_wait   = 1[s]
Noe            = TRUE
Noe_time       = 2.5[s]
Recvr_gain     = 60
Relaxation_delay = 2.5[s]
Repetition_time = 3.19206016[s]
Temp_get       = 21.8[dC]

```

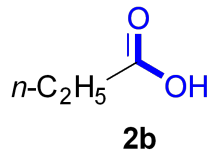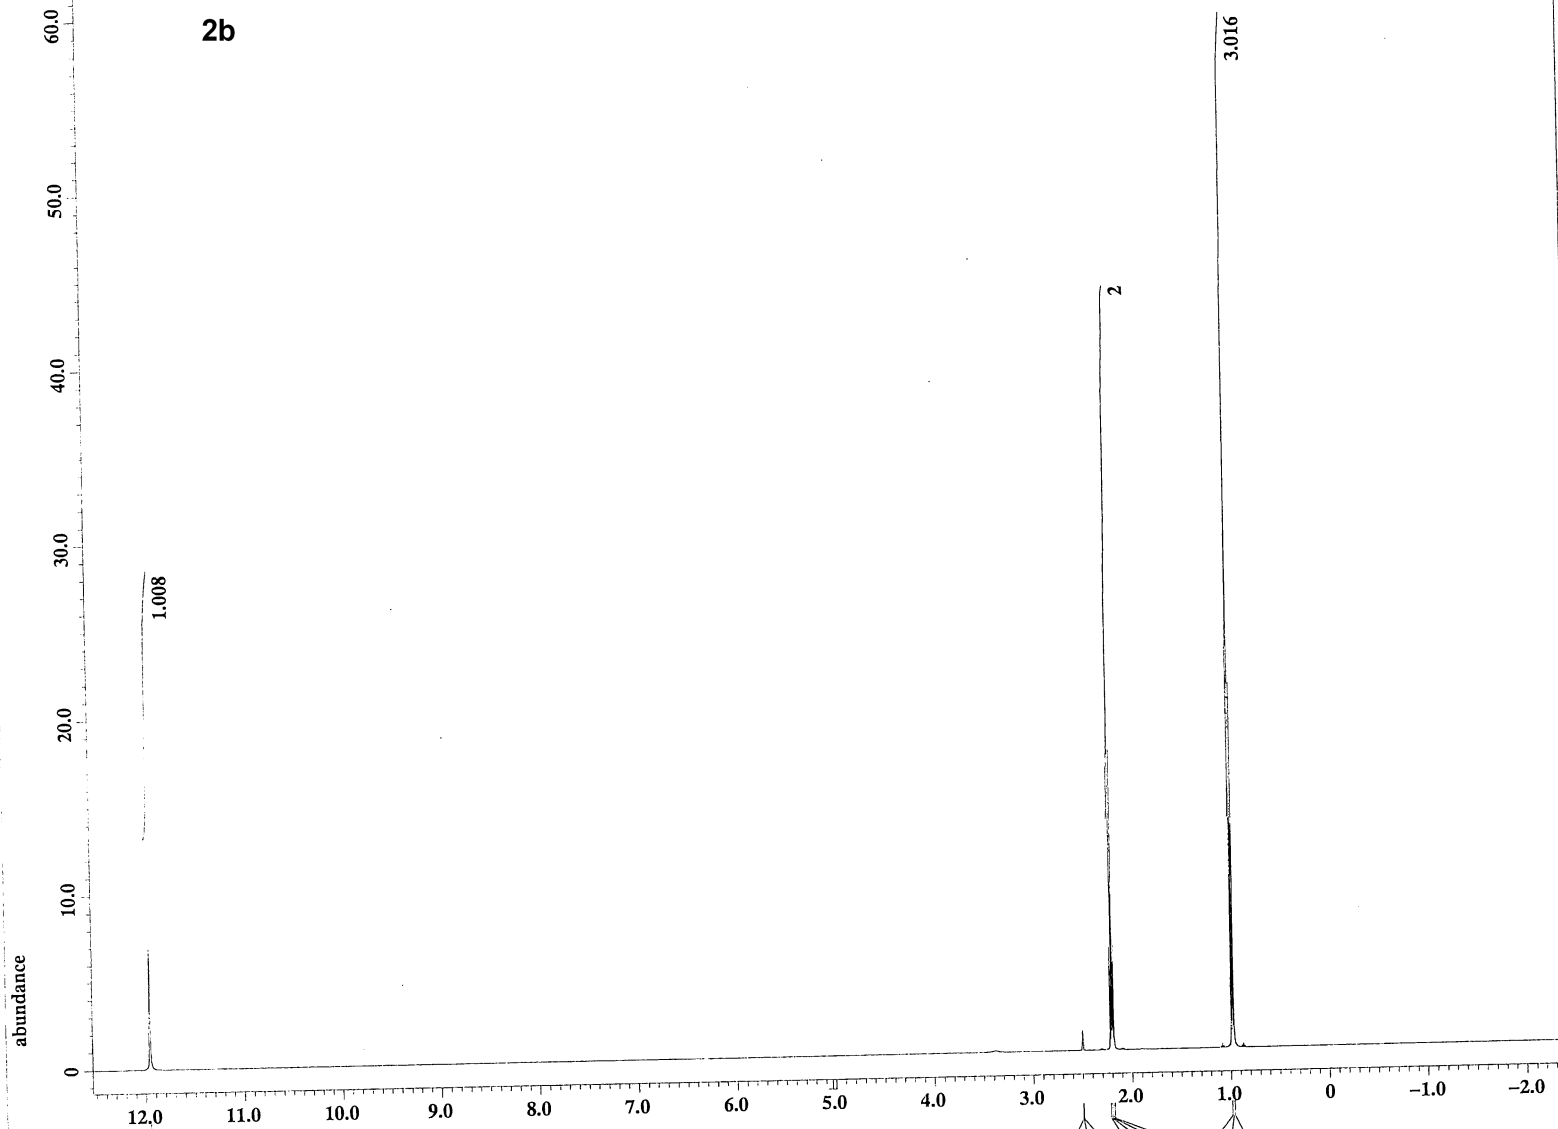

```

Filename      = Exp-R-124-3a-P-4.jdf
Author       = delta
Experiment   = single_pulse.ex2
Sample_id    = Exp-R-124-3a-P
Solvent      = DMSO-D6
Creation_time = 3-SEP-2018 17:04:25
Revision_time = 3-SEP-2018 17:09:34
Current_time  = 3-SEP-2018 17:09:37
  
```

```

Content      = Exp-R-124-3a-P
Data_format  = 1D COMPLEX
Dim_size     = 13107
Dim_title    = 1H
Dim_units    = [ppm]
Dimensions   = X
Site         = ECA 600
Spectrometer = DELTA2_NMR
  
```

```

Field_strength = 14.09636928[T] (600[M]
X_acq_duration = 1.4548992[s]
X_domain       = 1H
X_freq         = 600.1723046[MHz]
X_offset       = 5[ppm]
X_points       = 16384
X_prescans     = 1
X_resolution   = 0.68733284[Hz]
X_sweep        = 11.26126126[kHz]
Irr_domain     = 1H
Irr_freq       = 600.1723046[MHz]
Irr_offset     = 5[ppm]
Tri_domain     = 1H
Tri_freq       = 600.1723046[MHz]
Tri_offset     = 5[ppm]
Clipped        = FALSE
Mod_return     = 1
Scans          = 8
Total_scans    = 8
  
```

```

X_90_width    = 12.68[us]
X_acq_time     = 1.4548992[s]
X_angle        = 45[deg]
X_atn          = 3.4[dB]
X_pulse        = 6.34[us]
Irr_mode       = Off
Tri_mode       = Off
Dante_presat   = FALSE
Initial_wait   = 1[s]
Recvr_gain     = 40
Relaxation_delay = 5[s]
Repetition_time = 6.4548992[s]
Temp_get       = 21.5[dC]
  
```

11.9584

2.5023  
 2.5000  
 2.4966  
 2.2206  
 2.2080  
 2.1954  
 2.1839  
 0.9929  
 0.9803  
 0.9677

X : parts per Million : 1H



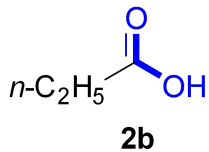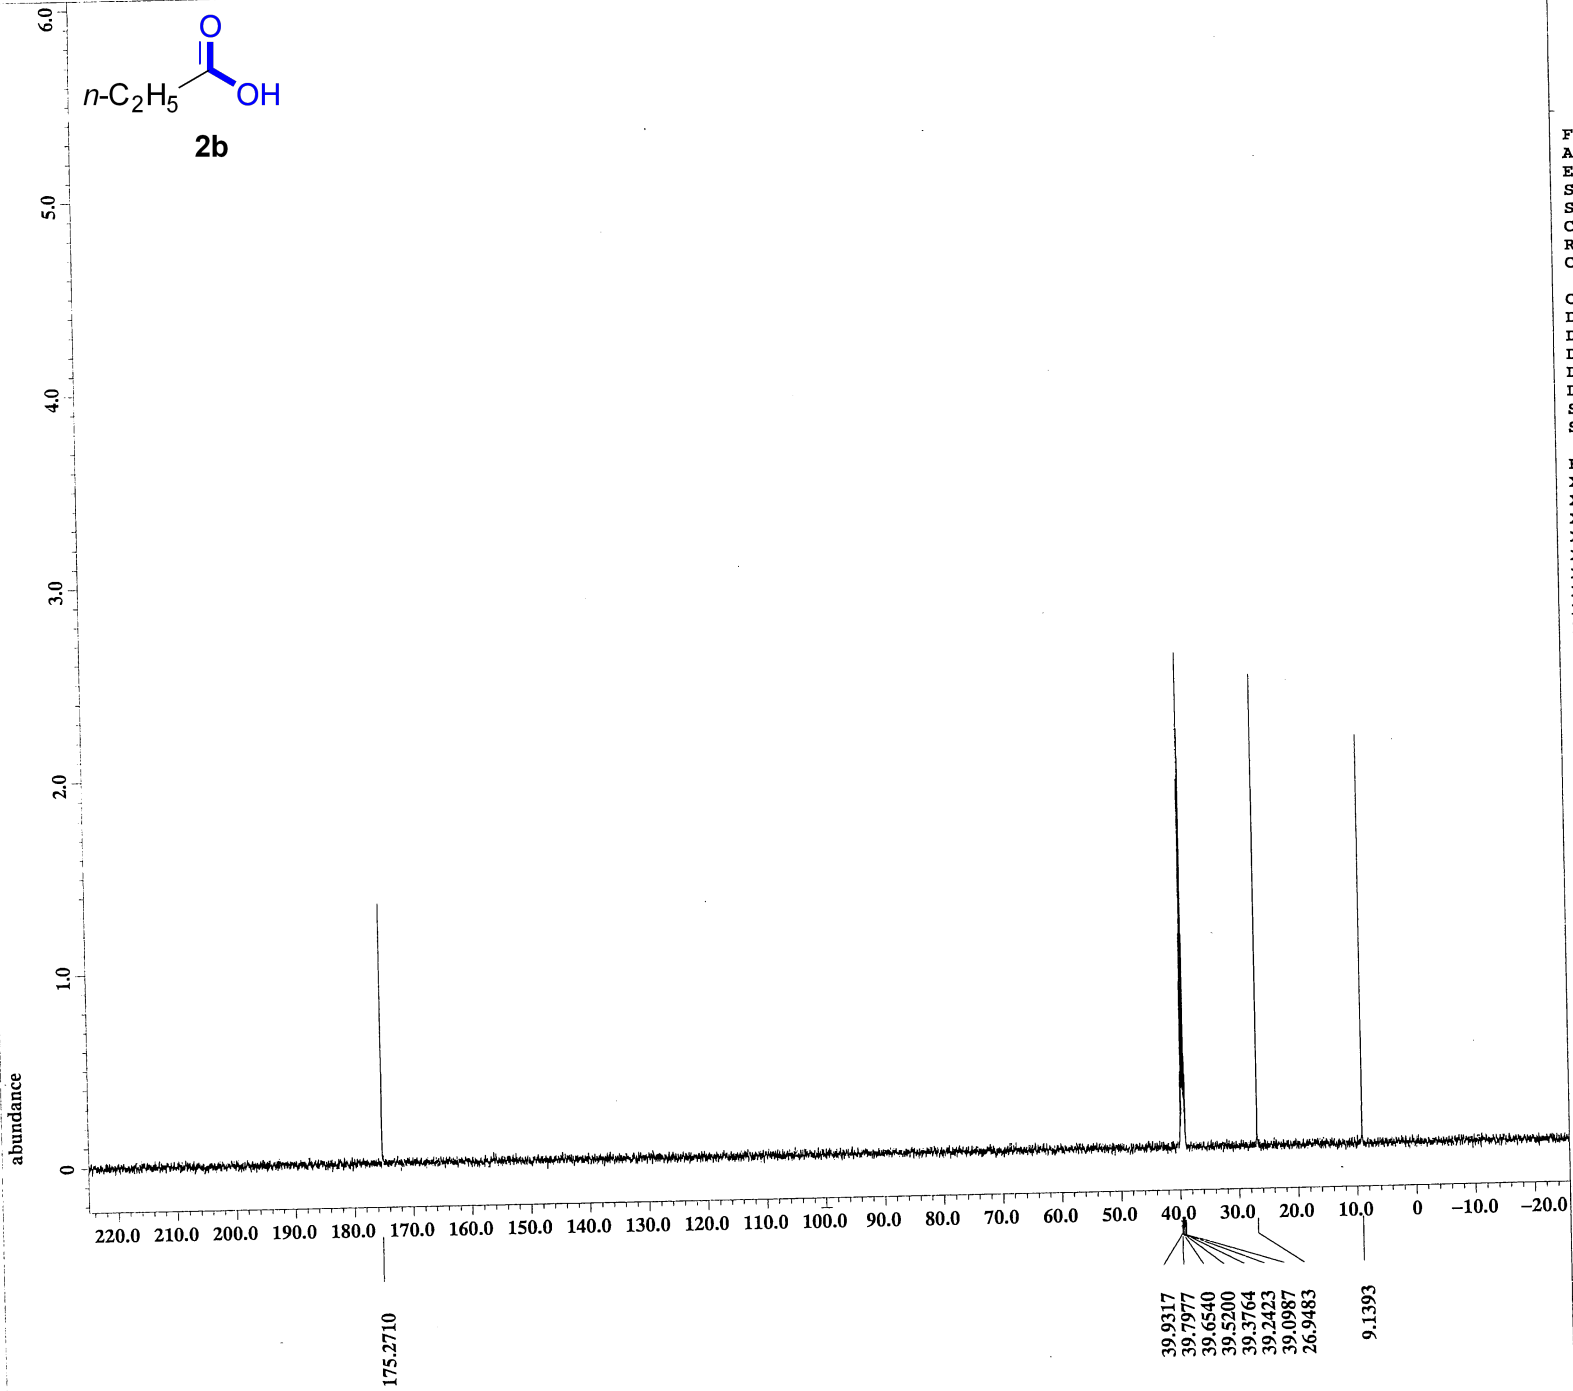

```

Filename      = Exp-R-124-3a-C-3.jdf
Author       = delta
Experiment   = single_pulse_dec
Sample_id    = Exp-R-124-3a-C
Solvent      = DMSO-D6
Creation_time = 3-SEP-2018 17:07:38
Revision_time = 3-SEP-2018 17:10:14
Current_time  = 3-SEP-2018 17:10:25

Content      = Exp-R-124-3a-C
Data_format  = 1D COMPLEX
Dim_size     = 26214
Dim_title    = 13C
Dim_units    = [ppm]
Dimensions   = X
Site         = ECA 600
Spectrometer = DELTA2_NMR

Field_strength = 14.09636928[T] (600[M]
X_acq_duration = 0.69206016[s]
X_domain       = 13C
X_freq         = 150.91343039[MHz]
X_offset       = 100[ppm]
X_points       = 32768
X_prescans     = 4
X_resolution   = 1.44496109[Hz]
X_sweep        = 47.34848485[kHz]
Irr_domain     = 1H
Irr_freq       = 600.1723046[MHz]
Irr_offset     = 5[ppm]
Clipped        = FALSE
Mod_return     = 1
Scans          = 45
Total_scans    = 45

X_90_width    = 12[us]
X_acq_time     = 0.69206016[s]
X_angle        = 30[deg]
X_atn          = 7.5[dB]
X_pulse        = 4[us]
Irr_atn_dec    = 18.95[dB]
Irr_atn_noe    = 18.95[dB]
Irr_noise      = WALTZ
Decoupling     = TRUE
Initial_wait   = 1[s]
Noe            = TRUE
Noe_time       = 2.5[s]
Recvr_gain     = 60
Relaxation_delay = 2.5[s]
Repetition_time = 3.19206016[s]
Temp_get       = 22.2[dc]
  
```

X : parts per Million : 13C

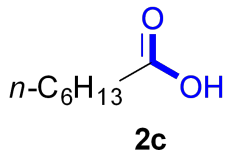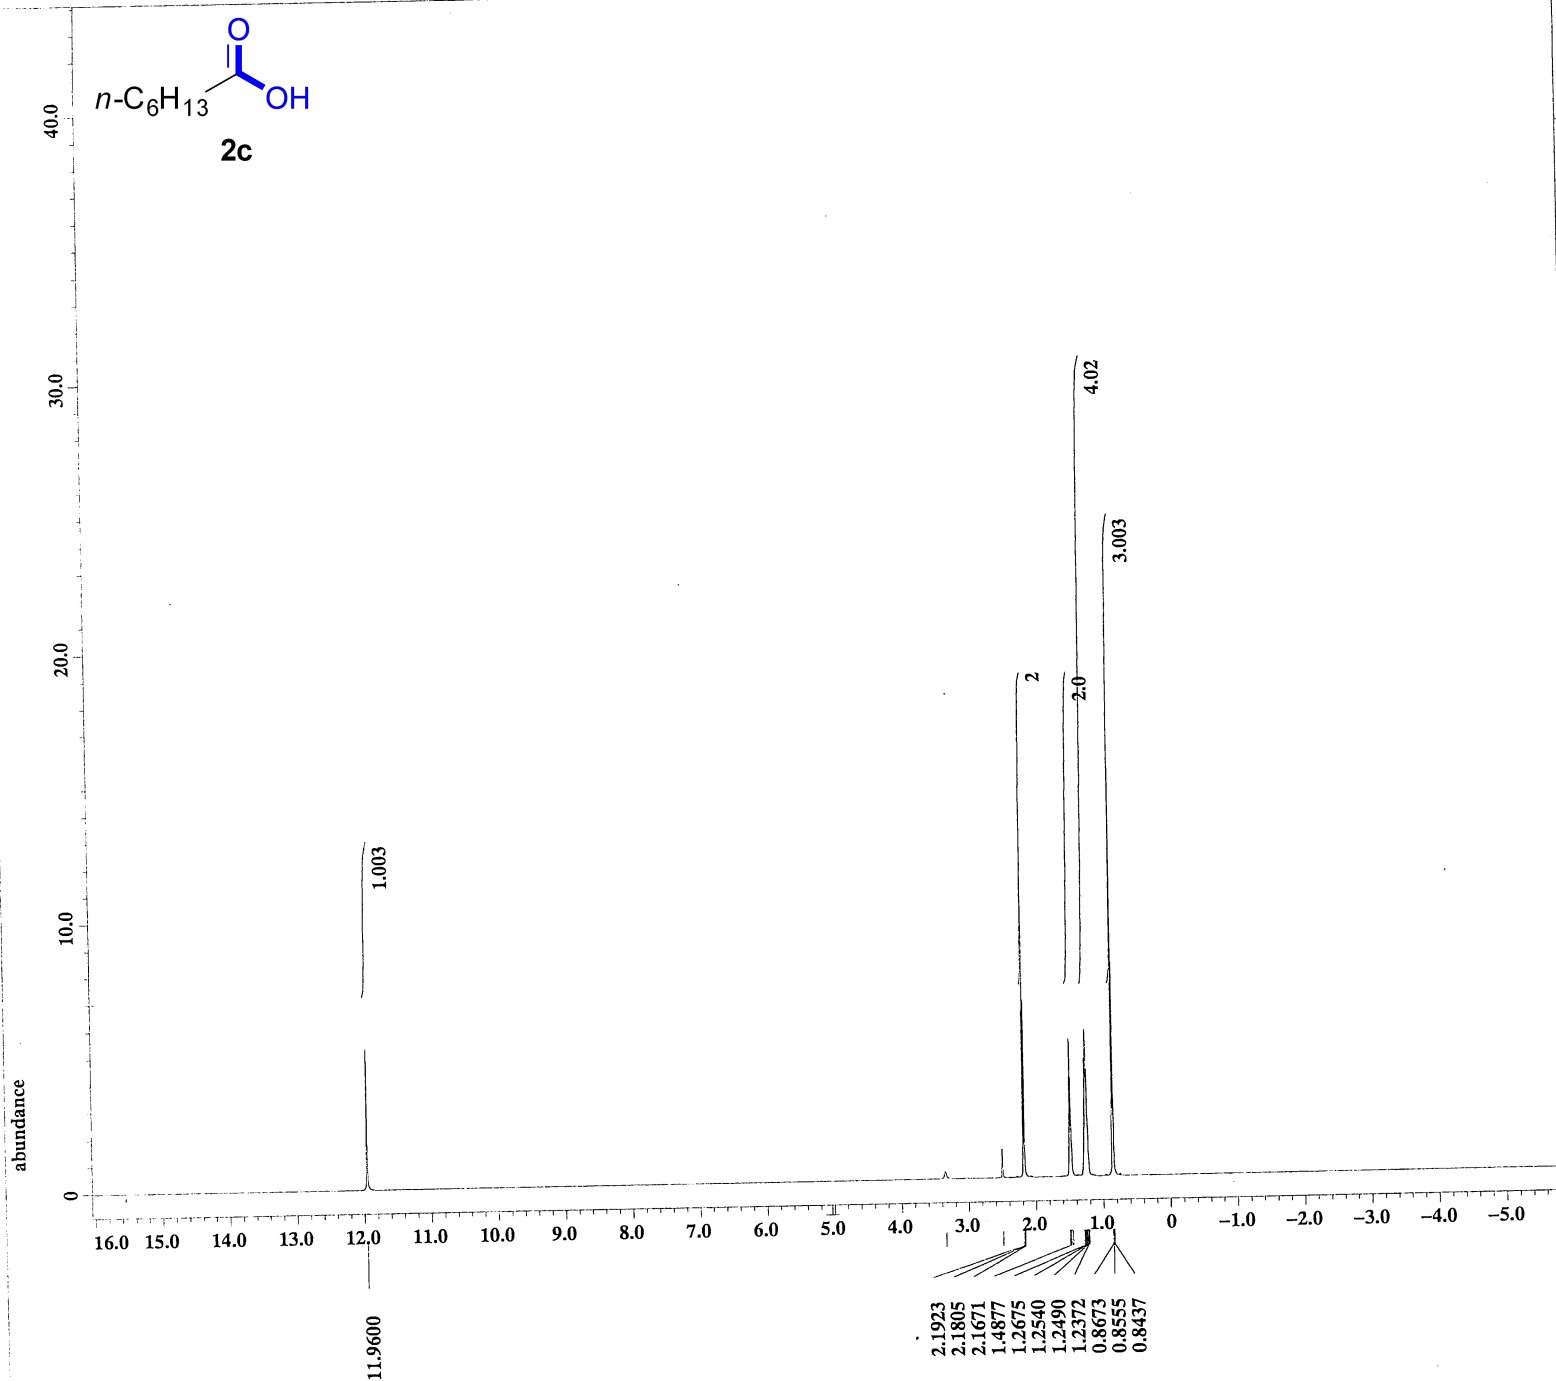

```

Filename      = Exp-R-124-10a-P-4.jdf
Author       = delta
Experiment   = single_pulse.ex2
Sample_id    = Exp-R-124-10a-P
Solvent      = DMSO-D6
Creation_time = 3-SEP-2018 17:15:21
Revision_time = 3-SEP-2018 17:20:28
Current_time  = 3-SEP-2018 17:20:31

Content      = Exp-R-124-10a-P
Data_format  = 1D_COMPLEX
Dim_size     = 13107
Dim_title    = 1H
Dim_units    = [ppm]
Dimensions   = X
Site         = ECA 600
Spectrometer = DELTA2_NMR

Field_strength = 14.09636928[T] (600[M]
X_acq_duration = 0.99090432[s]
X_domain       = 1H
X_freq        = 600.1723046[MHz]
X_offset      = 5[ppm]
X_points      = 16384
X_prescans    = 1
X_resolution  = 1.00917917[Hz]
X_sweep       = 16.53439153[kHz]
Irr_domain    = 1H
Irr_freq      = 600.1723046[MHz]
Irr_offset    = 5[ppm]
Tri_domain    = 1H
Tri_freq      = 600.1723046[MHz]
Tri_offset    = 5[ppm]
Clipped       = FALSE
Mod_return    = 1
Scans         = 8
Total_scans   = 8

X_90_width   = 12.68[us]
X_acq_time    = 0.99090432[s]
X_angle       = 45[deg]
X_atn        = 3.4[dB]
X_pulse      = 6.34[us]
Irr_mode     = Off
Tri_mode     = Off
Dante_presat = FALSE
Initial_wait  = 1[s]
Recvr_gain   = 40
Relaxation_delay = 5[s]
Repetition_time = 5.99090432[s]
Temp_get     = 21.9[dc]

```

X : parts per Million : 1H

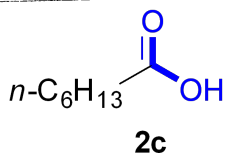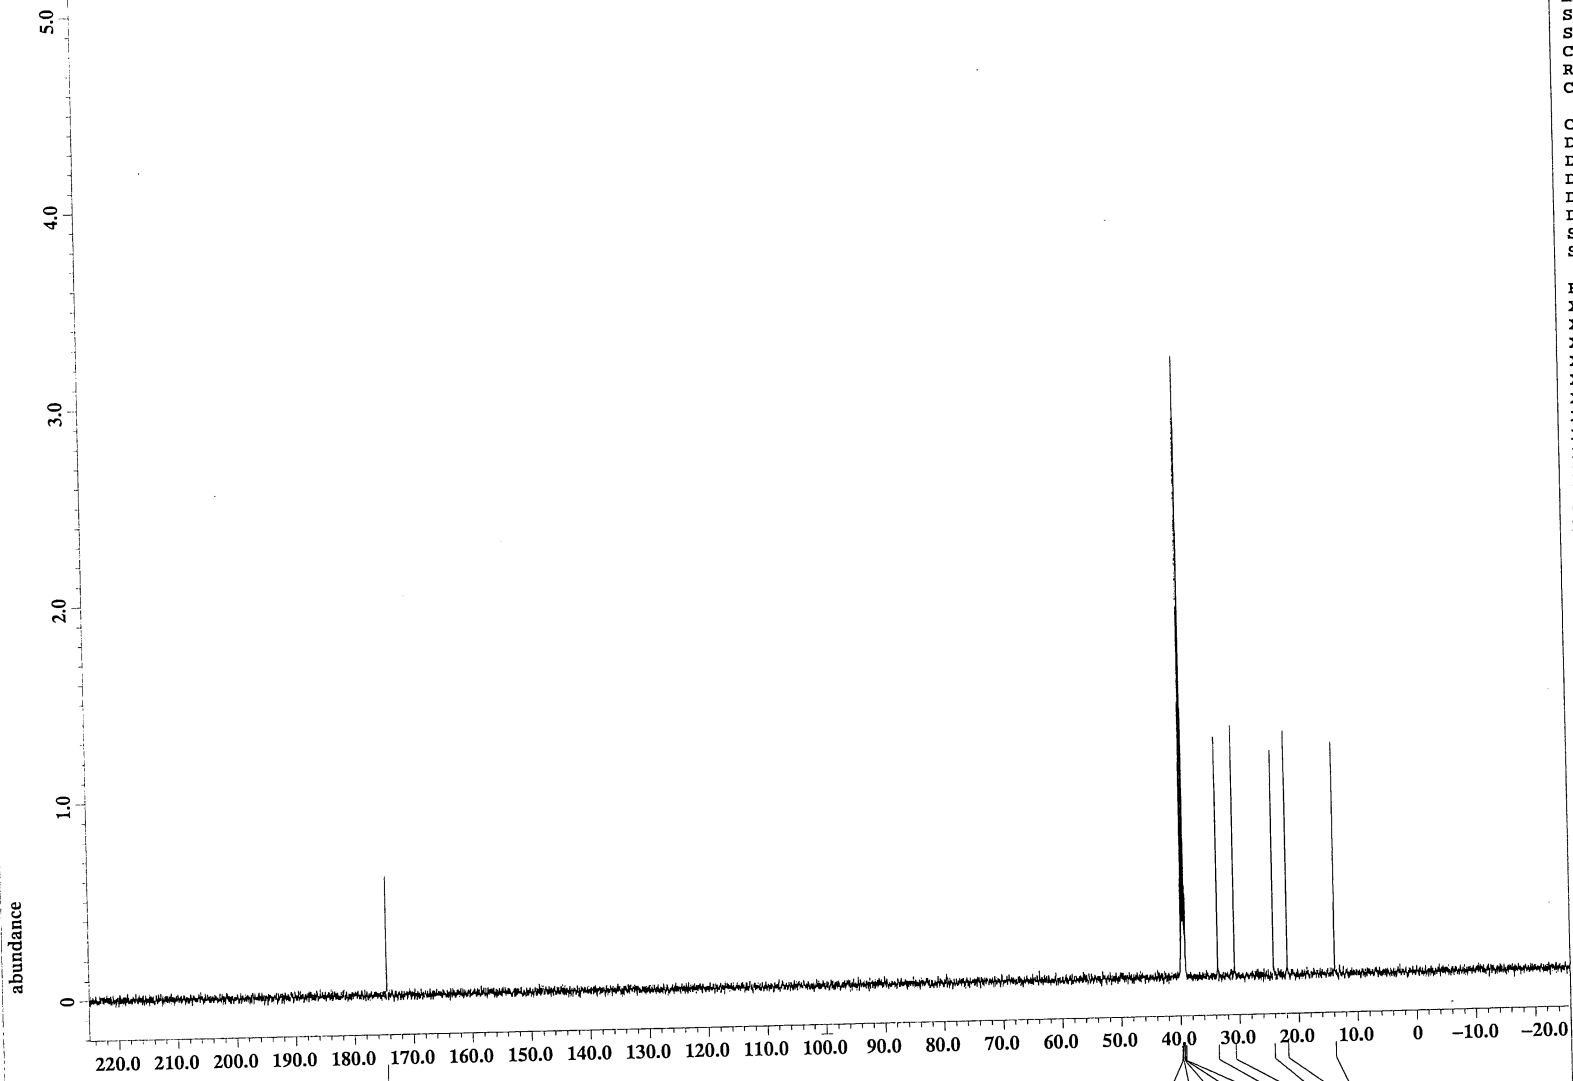

```

Filename      = Exp-R-124-10a-C-3.jdf
Author       = delta
Experiment   = single_pulse_dec
Sample_id    = Exp-R-124-10a-C
Solvent      = DMSO-D6
Creation_time = 3-SEP-2018 17:18:33
Revision_time = 3-SEP-2018 17:21:00
Current_time  = 3-SEP-2018 17:21:23

Content      = Exp-R-124-10a-C
Data_format  = 1D_COMPLEX
Dim_size     = 26214
Dim_title    = 13C
Dim_units    = [ppm]
Dimensions   = X
Site         = ECA 600
Spectrometer = DELTA2_NMR

Field_strength = 14.09636928[T] (600[M]
X_acq_duration = 0.69206016[s]
X_domain       = 13C
X_freq         = 150.91343039[MHz]
X_offset       = 100[ppm]
X_points       = 32768
X_prescans     = 4
X_resolution   = 1.44496109[Hz]
X_sweep        = 47.34848485[kHz]
Irr_domain     = 1H
Irr_freq       = 600.1723046[MHz]
Irr_offset     = 5[ppm]
Clipped        = FALSE
Mod_return     = 1
Scans          = 45
Total_scans    = 45

X_90_width    = 12[us]
X_acq_time    = 0.69206016[s]
X_angle       = 30[deg]
X_atn         = 7.5[dB]
X_pulse       = 4[us]
Irr_atn_dec   = 18.95[dB]
Irr_atn_noe   = 18.95[dB]
Irr_noise     = WALTZ
Decoupling    = TRUE
Initial_wait  = 1[s]
Noe           = TRUE
Noe_time      = 2.5[s]
Recvr_gain    = 60
Relaxation_delay = 2.5[s]
Repetition_time = 3.19206016[s]
Temp_get      = 22.4[dc]

```

X : parts per Million : 13C

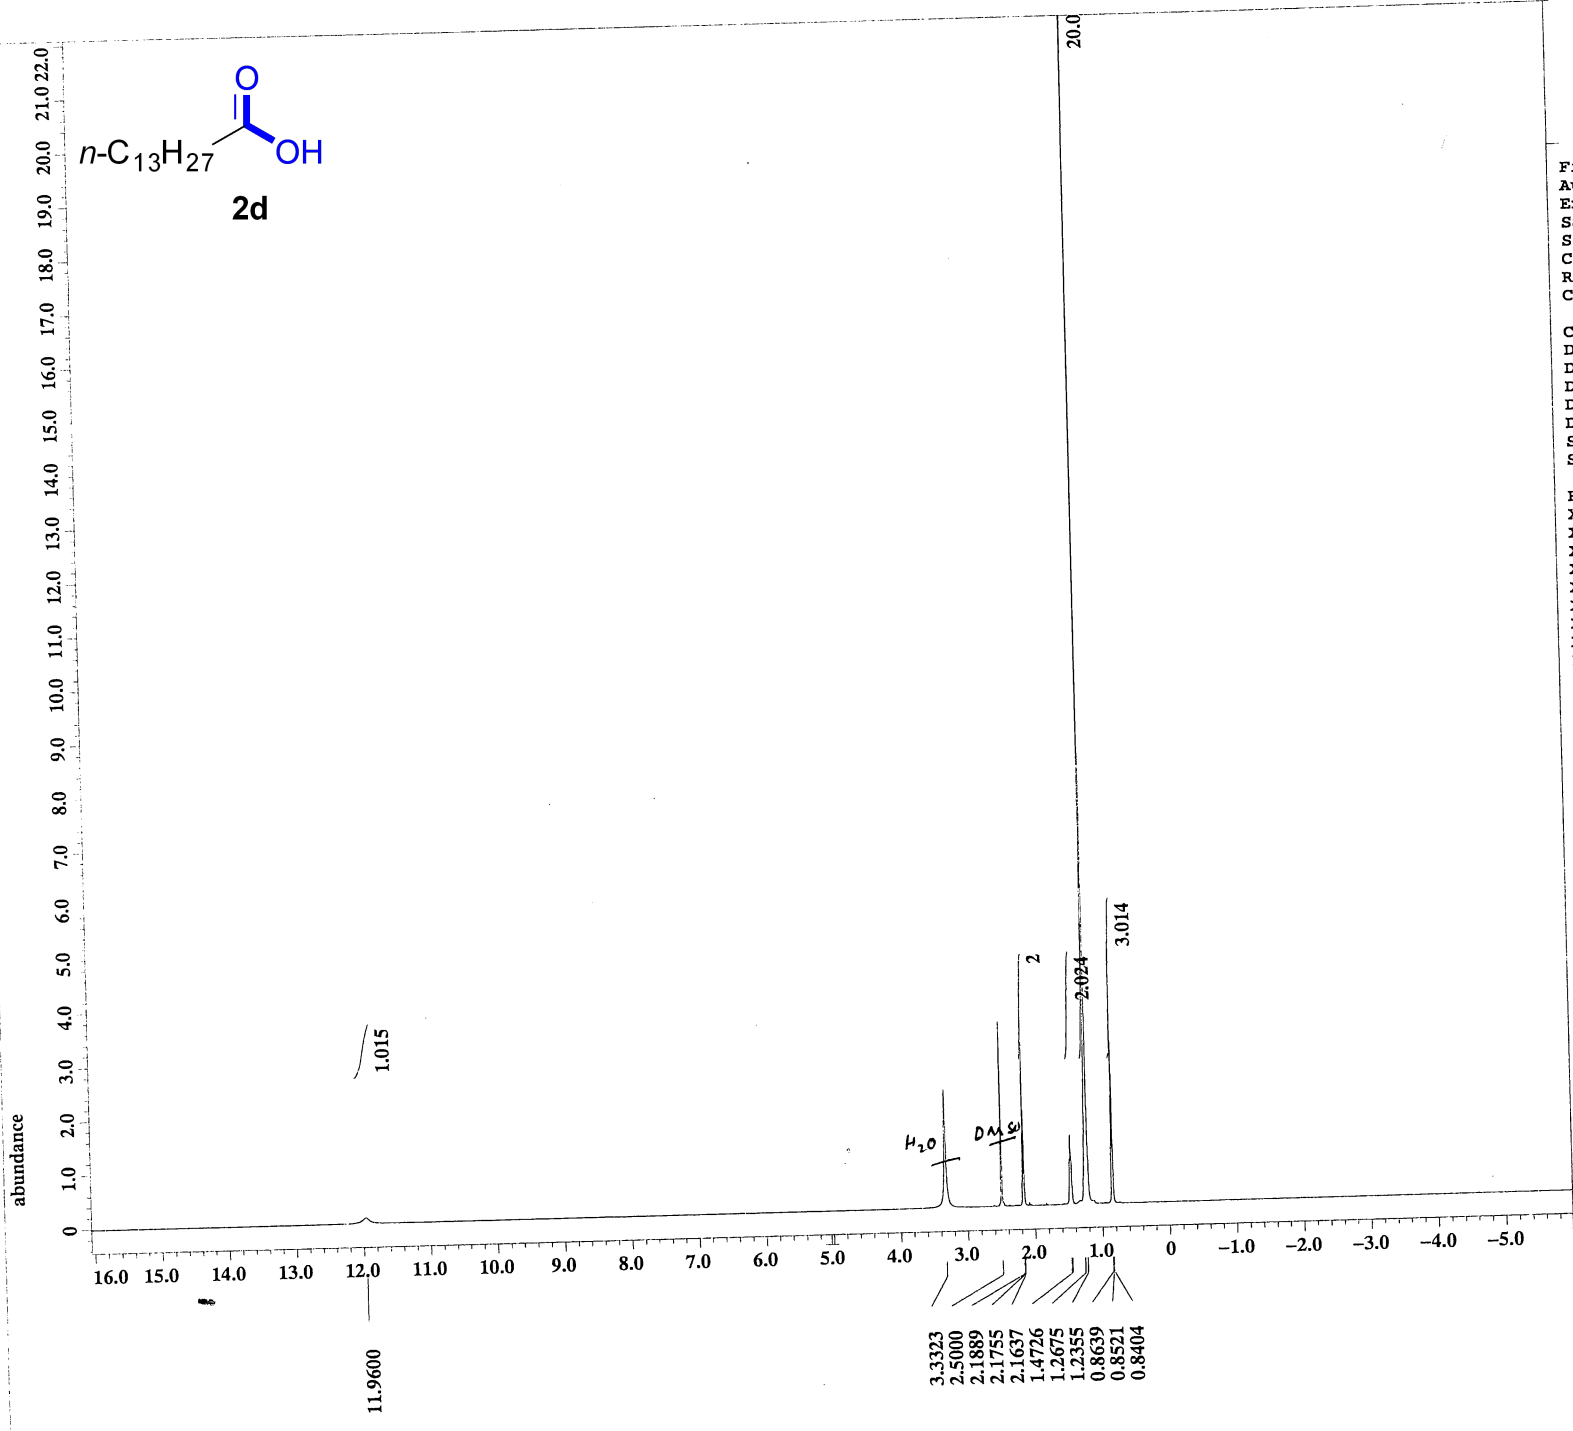

```

Filename      = Exp-R-122-5a-P-4.jdf
Author       = delta
Experiment   = single_pulse.ex2
Sample_id    = Exp-R-122-5a-P
Solvent      = DMSO-D6
Creation_time = 1-AUG-2018 18:53:36
Revision_time = 1-AUG-2018 19:26:56
Current_time  = 1-AUG-2018 19:27:00

Content      = Exp-R-122-5a-P
Data_format  = 1D_COMPLEX
Dim_size     = 13107
Dim_title    = 1H
Dim_units    = [ppm]
Dimensions   = X
Site         = ECA_600
Spectrometer = DELTA2_NMR

Field_strength = 14.09636928[T] (600[M]
X_acq_duration = 0.99090432[s]
X_domain       = 1H
X_freq         = 600.1723046[MHz]
X_offset       = 5[ppm]
X_points       = 16384
X_prescans    = 1
X_resolution   = 1.00917917[Hz]
X_sweep        = 16.53439153[kHz]
Irr_domain     = 1H
Irr_freq       = 600.1723046[MHz]
Irr_offset     = 5[ppm]
Tri_domain     = 1H
Tri_freq       = 600.1723046[MHz]
Tri_offset     = 5[ppm]
Clipped        = FALSE
Mod_return     = 1
Scans          = 8
Total_scans    = 8

X_90_width    = 12.68[us]
X_acq_time     = 0.99090432[s]
X_angle        = 45[deg]
X_atn          = 3.4[dB]
X_atn         = 6.34[us]
X_pulse        = Off
Irr_mode       = Off
Tri_mode       = Off
Dante_presat   = FALSE
Initial_wait   = 1[s]
Recvr_gain     = 48
Relaxation_delay = 5[s]
Repetition_time = 5.99090432[s]
Temp_get       = 21.8[dc]
  
```

X : parts per Million : 1H

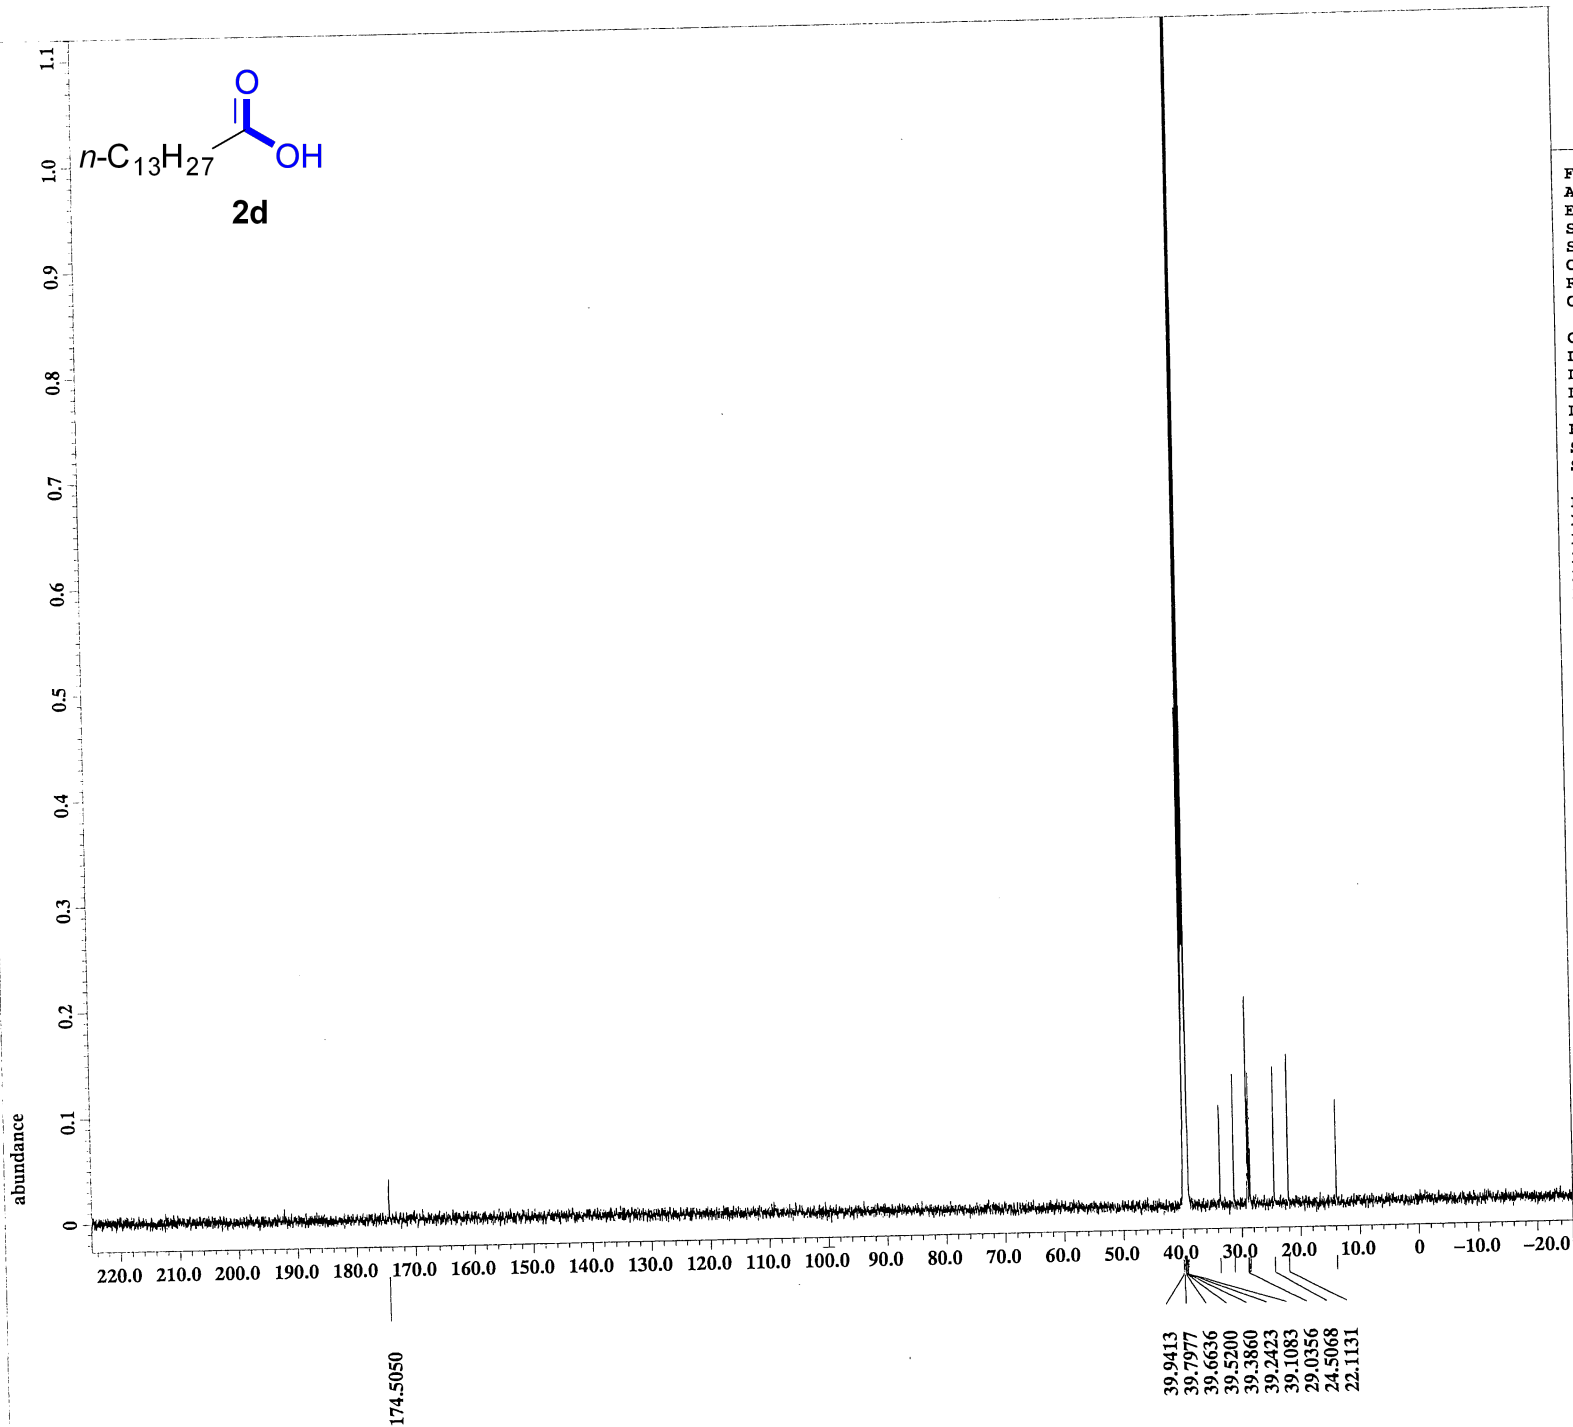

```

Filename      = Exp-R-122-5a-C-3.jdf
Author       = delta
Experiment   = single_pulse_dec
Sample_id    = Exp-R-122-5a-C
Solvent      = DMSO-D6
Creation_time = 1-AUG-2018 19:37:16
Revision_time = 1-AUG-2018 20:07:53
Current_time  = 1-AUG-2018 20:08:23

Content      = Exp-R-122-5a-C
Data_format  = 1D COMPLEX
Dim_size     = 26214
Dim_title    = 13C
Dim_units    = [ppm]
Dimensions   = X
Site         = ECA 600
Spectrometer = DELTA2_NMR

Field_strength = 14.09636928[T] (600[M
X_acq_duration = 0.69206016[s]
X_domain       = 13C
X_freq         = 150.91343039[MHz]
X_offset       = 100[ppm]
X_points       = 32768
X_prescans     = 4
X_resolution   = 1.44496109[Hz]
X_sweep        = 47.34848485[kHz]
Irr_domain     = 1H
Irr_freq       = 600.1723046[MHz]
Irr_offset     = 5[ppm]
Clipped        = TRUE
Mod_return     = 1
Scans          = 805
Total_scans    = 805

X_90_width    = 12[us]
X_acq_time    = 0.69206016[s]
X_angle       = 30[deg]
X_atn         = 7.5[dB]
X_pulse       = 4[us]
Irr_atn_dec   = 18.95[dB]
Irr_atn_noe   = 18.95[dB]
Irr_noise     = WALTZ
Decoupling    = TRUE
Initial_wait  = 1[s]
Noe           = TRUE
Noe_time      = 2.5[s]
Recvr_gain    = 60
Relaxation_delay = 2.5[s]
Repetition_time = 3.19206016[s]
Temp_get      = 22.5[dc]
  
```

X : parts per Million : 13C

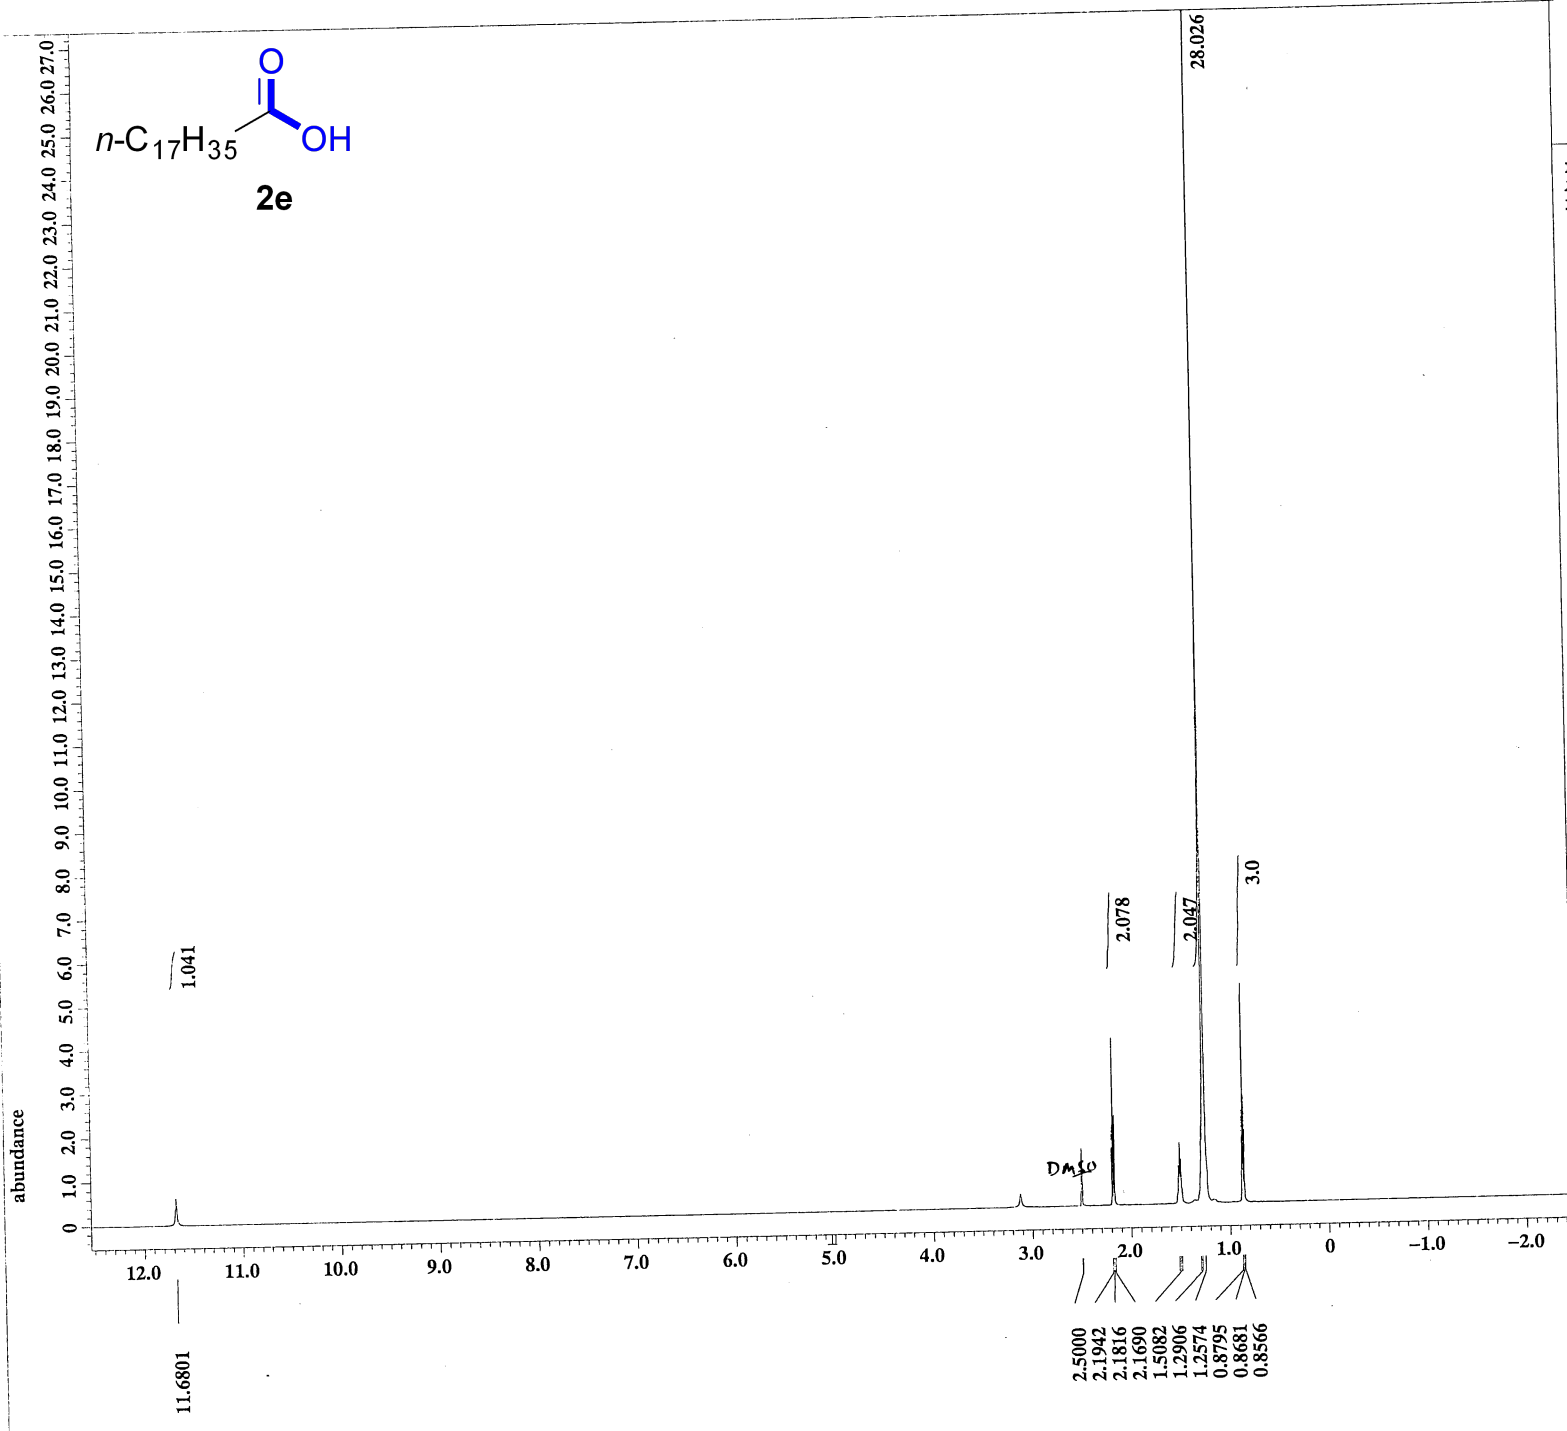

```

Filename      = Exp-R-124-9a-proton-4
Author       = delta
Experiment   = single_pulse.ex2
Sample_id    = Exp-R-124-9a-proton
Solvent      = DMSO-D6
Creation_time = 20-SEP-2018 12:27:22
Revision_time = 20-SEP-2018 12:37:22
Current_time  = 20-SEP-2018 12:37:26

Content      = Exp-R-124-9a-proton
Data_format  = 1D COMPLEX
Dim_size     = 13107
Dim_title    = 1H
Dim_units    = [ppm]
Dimensions   = X
Site         = ECA 600
Spectrometer = DELTA2_NMR

Field_strength = 14.09636928[T] (600[M]
X_acq_duration = 1.4548992[s]
X_domain       = 1H
X_freq         = 600.1723046[MHz]
X_offset       = 5[ppm]
X_points       = 16384
X_prescans     = 1
X_resolution   = 0.68733284[Hz]
X_sweep        = 11.26126126[kHz]
Irr_domain     = 1H
Irr_freq       = 600.1723046[MHz]
Irr_offset     = 5[ppm]
Tri_domain     = 1H
Tri_freq       = 600.1723046[MHz]
Tri_offset     = 5[ppm]
Clipped        = FALSE
Mod_return     = 1
Scans          = 8
Total_scans    = 8

X_90_width    = 12.68[us]
X_acq_time     = 1.4548992[s]
X_angle        = 45[deg]
X_atn          = 3.4[dB]
X_pulse        = 6.34[us]
Irr_mode       = Off
Tri_mode       = Off
Dante_presat   = FALSE
Initial_wait   = 1[s]
Recvr_gain     = 44
Relaxation_delay = 5[s]
Repetition_time = 6.4548992[s]
Temp_get       = 70[dc]

```

X : parts per Million : 1H

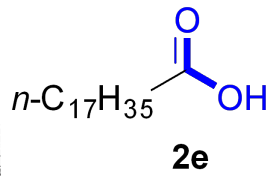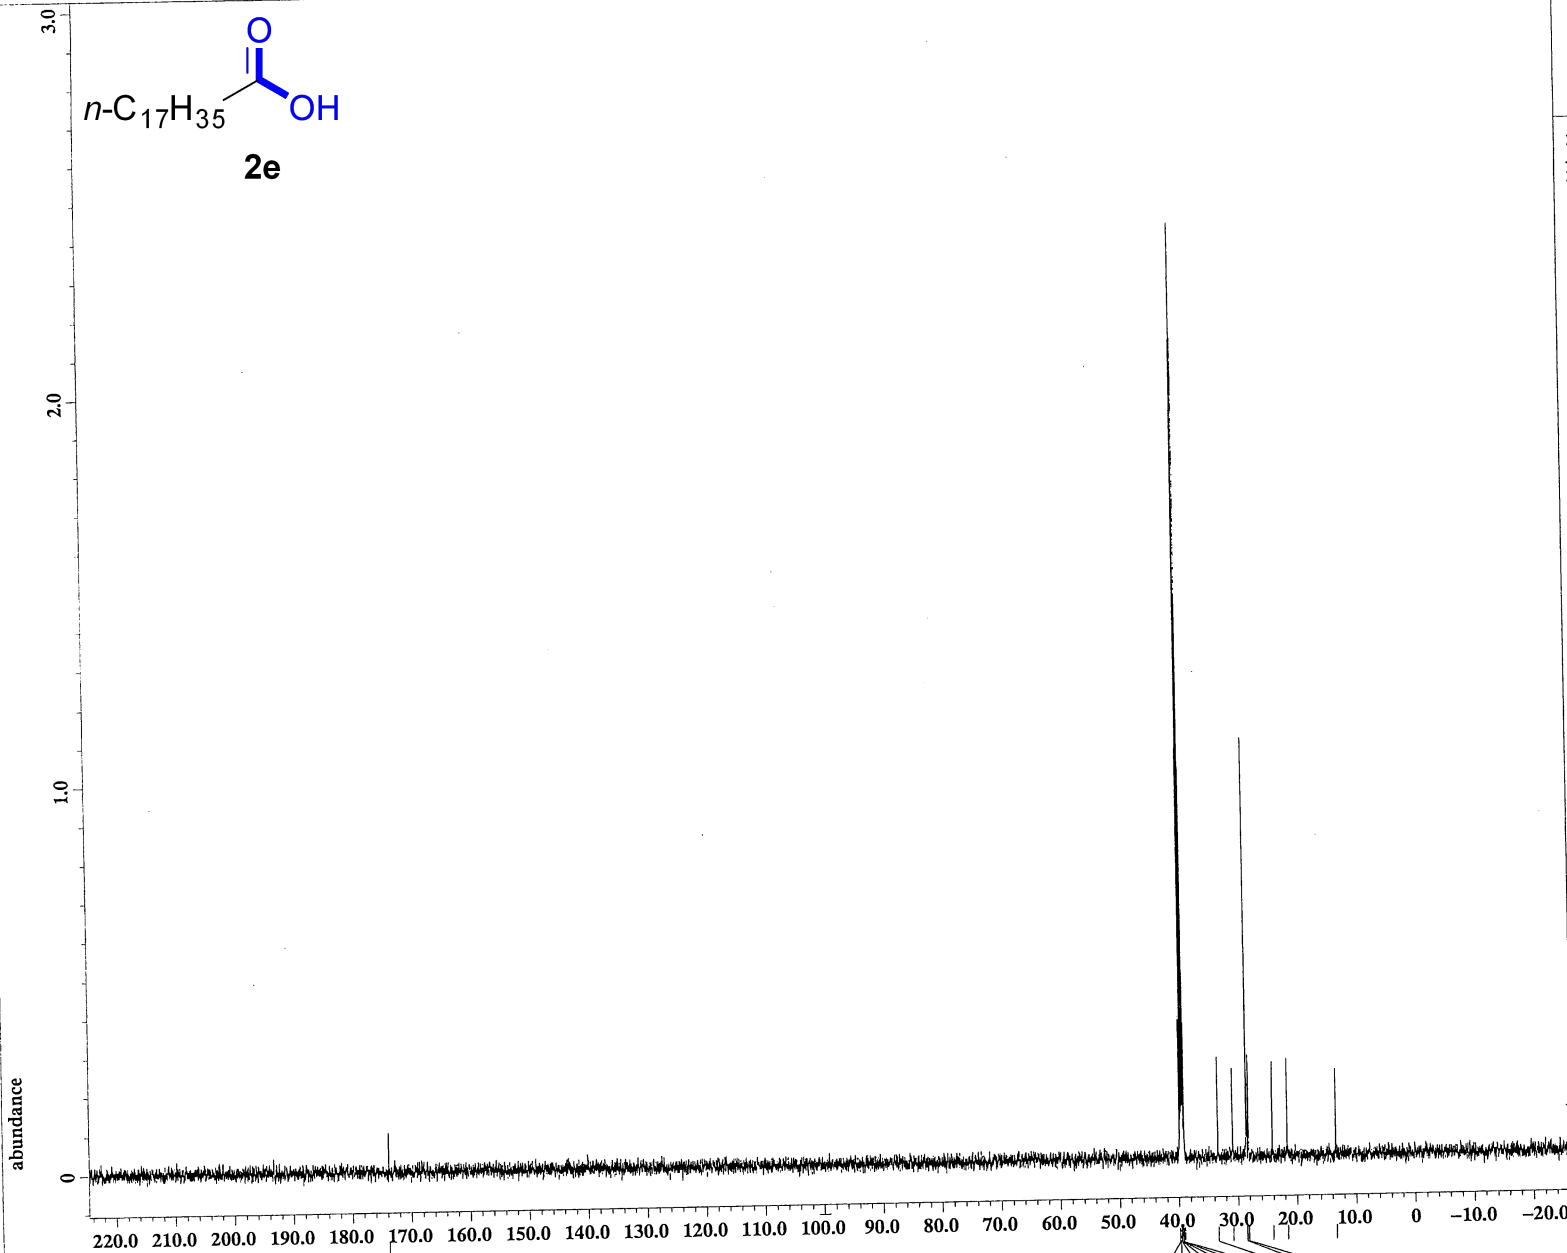

Filename = Exp-R-124-9a-Carbon-4  
 Author = delta  
 Experiment = single\_pulse\_dec  
 Sample\_id = Exp-R-124-9a-Carbon  
 Solvent = DMSO-D6  
 Creation\_time = 20-SEP-2018 12:32:40  
 Revision\_time = 20-SEP-2018 12:38:58  
 Current\_time = 20-SEP-2018 12:39:50

Content = Exp-R-124-9a-Carbon  
 Data\_format = 1D\_COMPLEX  
 Dim\_size = 26214  
 Dim\_title = 13C  
 Dim\_units = [ppm]  
 Dimensions = X  
 Site = ECA 600  
 Spectrometer = DELTA2\_NMR

Field\_strength = 14.09636928[T] (600[M]  
 X\_acq\_duration = 0.69206016[s]  
 X\_domain = 13C  
 X\_freq = 150.91343039 [MHz]  
 X\_offset = 100 [ppm]  
 X\_points = 32768  
 X\_prescans = 4  
 X\_resolution = 1.44496109 [Hz]  
 X\_sweep = 47.34848485 [kHz]  
 Irr\_domain = 1H  
 Irr\_freq = 600.1723046 [MHz]  
 Irr\_offset = 5 [ppm]  
 Clipped = FALSE  
 Mod\_return = 1  
 Scans = 102  
 Total\_scans = 102

X\_90\_width = 12 [us]  
 X\_acq\_time = 0.69206016 [s]  
 X\_angle = 30 [deg]  
 X\_atn = 7.5 [dB]  
 X\_pulse = 4 [us]  
 Irr\_atn\_dec = 18.95 [dB]  
 Irr\_atn\_noe = 18.95 [dB]  
 Irr\_noise = WALTZ  
 Decoupling = TRUE  
 Initial\_wait = 1 [s]  
 Noe = TRUE  
 Noe\_time = 2 [s]  
 Recvr\_gain = 60  
 Relaxation\_delay = 2 [s]  
 Repetition\_time = 2.69206016 [s]  
 Temp\_get = 70 [dC]

- 39.9317
- 39.7977
- 39.6540
- 39.5200
- 39.3764
- 39.2423
- 39.0987
- 33.4017
- 28.6143
- 28.2697

X : parts per Million : 13C

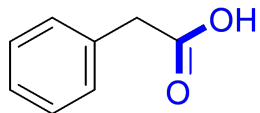

2f

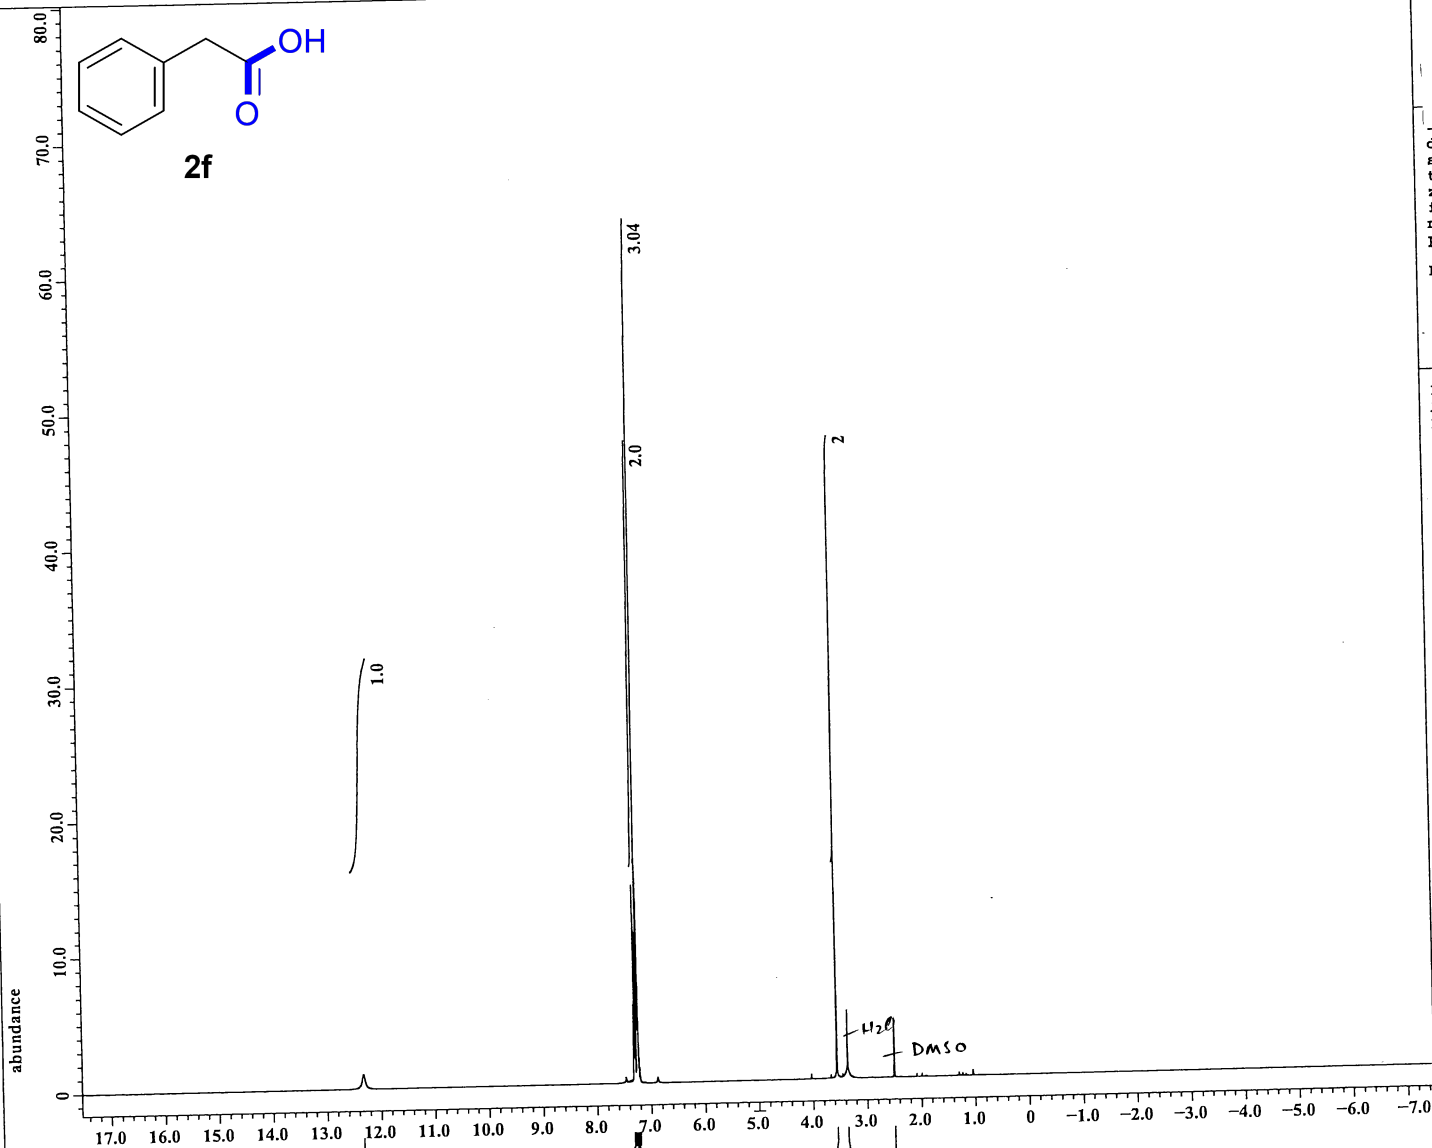

X : parts per Million : 1H

----- PROCESSING PARAMETERS -----  
 dc\_balance : 0 : FALSE  
 secp : 0.2[Hz] : 0.0[s]  
 trapezoid3 : 0[%] : 80[%] : 100[%]  
 zerofill : 1  
 fft : 1 : TRUE : TRUE  
 machinephase  
 ppm

Derived from: Exp-R-163-6-1a-P-1.jdf

Filename = Exp-R-163-6-1a-P-4.jd  
 Author = delta  
 Experiment = single\_pulse.ex2  
 Sample\_id = Exp-R-163-6-1a-P  
 Solvent = DMSO-D6  
 Creation\_time = 18-DEC-2018 12:19:52  
 Revision\_time = 18-DEC-2018 12:24:20  
 Current\_time = 18-DEC-2018 12:24:50

Comment = Exp-R-163-6-1a-P  
 Data\_format = 1D\_COMPLEX  
 Dim\_size = 13107  
 Dim\_title = 1H  
 Dim\_units = [ppm]  
 Dimensions = X  
 Site = ECA 600  
 Spectrometer = DELTA2\_NMR

Field\_strength = 14.09636928[T] (600[M]  
 X\_acq\_duration = 0.87293952[s]  
 X\_domain = 1H  
 X\_freq = 600.1723046[MHz]  
 X\_offset = 5[ppm]  
 X\_points = 16384  
 X\_prescans = 1  
 X\_resolution = 1.14555473[Hz]  
 X\_sweep = 18.76876877[kHz]  
 Irr\_domain = 1H  
 Irr\_freq = 600.1723046[MHz]  
 Irr\_offset = 5[ppm]  
 Tri\_domain = 1H  
 Tri\_freq = 600.1723046[MHz]  
 Tri\_offset = 5[ppm]  
 Clipped = FALSE  
 Mod\_return = 1  
 Scans = 8  
 Total\_scans = 8

X\_90\_width = 13.17[us]  
 X\_acq\_time = 0.87293952[s]  
 X\_angle = 45[deg]  
 X\_atn = 3.4[dB]  
 X\_pulse = 6.585[us]  
 Irr\_mode = Off  
 Tri\_mode = Off  
 Dante\_presat = FALSE  
 Initial\_wait = 1[s]  
 Recvr\_gain = 48  
 Relaxation\_delay = 5[s]  
 Repetition\_time = 5.87293952[s]  
 Temp\_get = 20.9[dc]



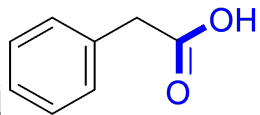

2f

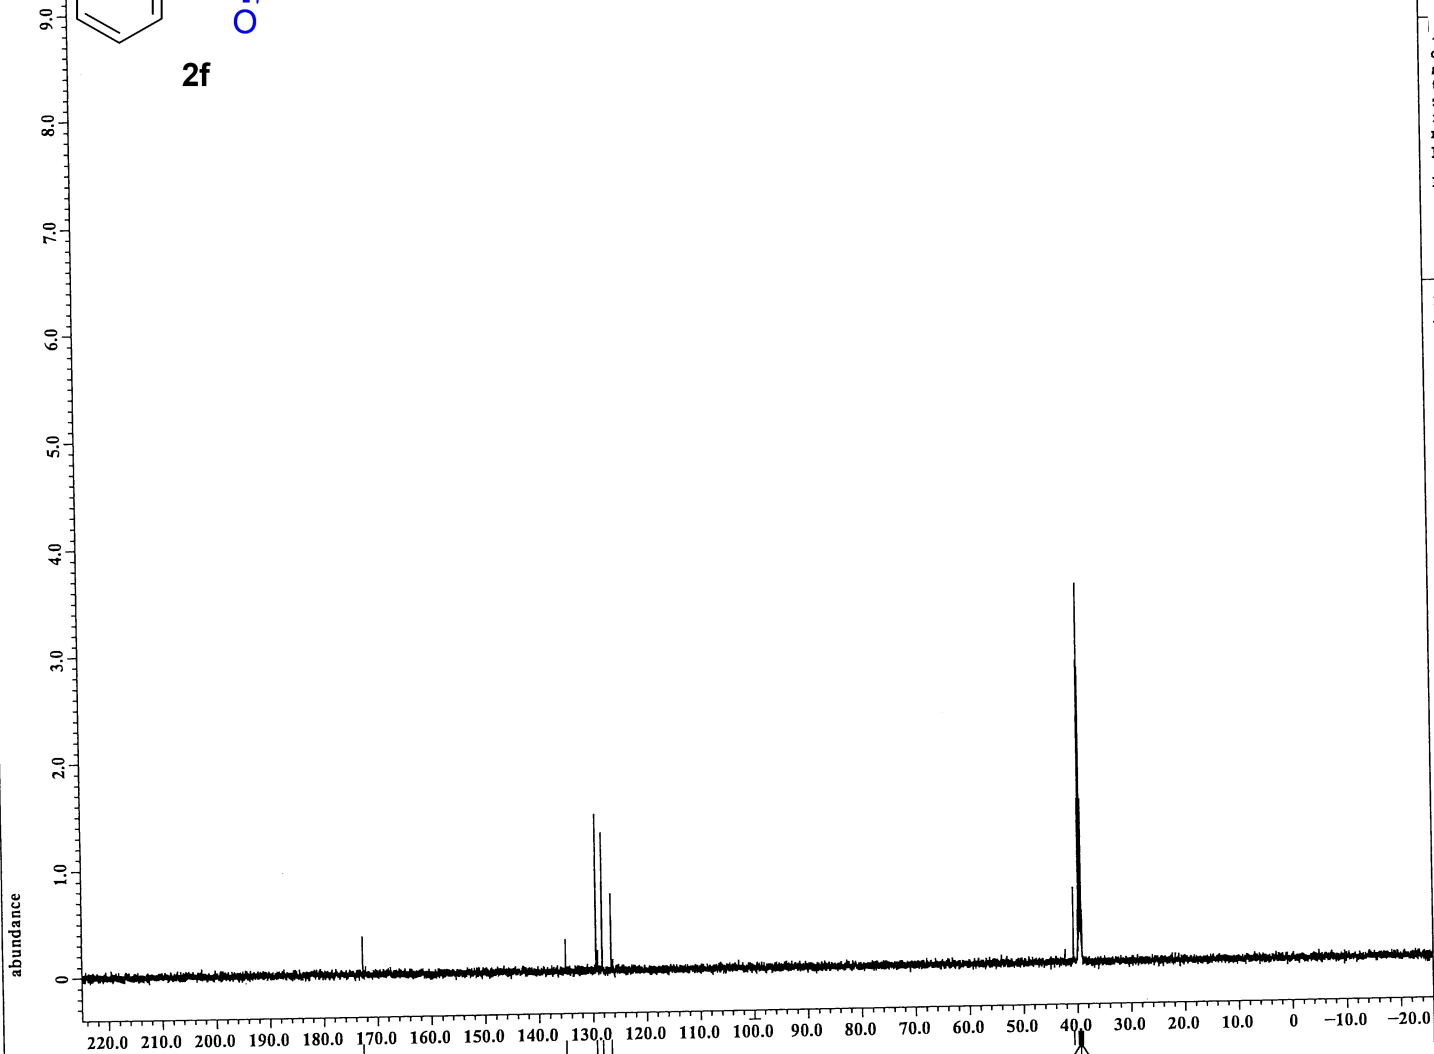

X : parts per Million : 13C

----- PROCESSING PARAMETERS -----

dc\_balance : 0 : FALSE  
 sexp : 2.0 [Hz] : 0.0 [s]  
 trapezoid3 : 0 [%] : 80 [%] : 100 [%]  
 zerofill : 1  
 fft : 1 : TRUE : TRUE  
 machinephase  
 ppm

Derived from: Exp-R-163-6-1a-C-2.jdf

Filename = Exp-R-163-6-1a-C-4.jd  
 Author = delta  
 Experiment = single\_pulse\_dec  
 Sample\_id = Exp-R-163-6-1a-C  
 Solvent = DMSO-D6  
 Creation\_time = 18-DEC-2018 12:30:56  
 Revision\_time = 18-DEC-2018 12:33:40  
 Current\_time = 18-DEC-2018 12:34:16

Comment = Exp-R-163-6-1a-C  
 Data\_format = 1D\_COMPLEX  
 Dim\_size = 26214  
 Dim\_title = 13C  
 Dim\_units = [ppm]  
 Dimensions = X  
 Site = ECA 600  
 Spectrometer = DELTA2\_NMR

Field\_strength = 14.09636928 [T] (600 [M])  
 X\_acq\_duration = 0.69206016 [s]  
 X\_domain = 13C  
 X\_freq = 150.91343039 [MHz]  
 X\_offset = 100 [ppm]  
 X\_points = 32768  
 X\_prescans = 4  
 X\_resolution = 1.44496109 [Hz]  
 X\_sweep = 47.34848485 [kHz]  
 Irr\_domain = 1H  
 Irr\_freq = 600.1723046 [MHz]  
 Irr\_offset = 5 [ppm]  
 Clipped = FALSE  
 Mod\_return = 1  
 Scans = 21  
 Total\_scans = 21

X\_90\_width = 12.7 [us]  
 X\_acq\_time = 0.69206016 [s]  
 X\_angle = 30 [deg]  
 X\_atn = 7.5 [dB]  
 X\_pulse = 4.23333333 [us]  
 Irr\_atn\_dec = 18.62 [dB]  
 Irr\_atn\_noe = 18.62 [dB]  
 Irr\_noise = WALTZ  
 Decoupling = TRUE  
 Initial\_wait = 1 [s]  
 Noe = TRUE  
 Noe\_time = 2 [s]  
 Recvr\_gain = 60  
 Relaxation\_delay = 2 [s]  
 Repetition\_time = 2.69206016 [s]  
 Temp\_get = 21.2 [dC]

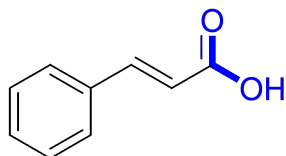

2g

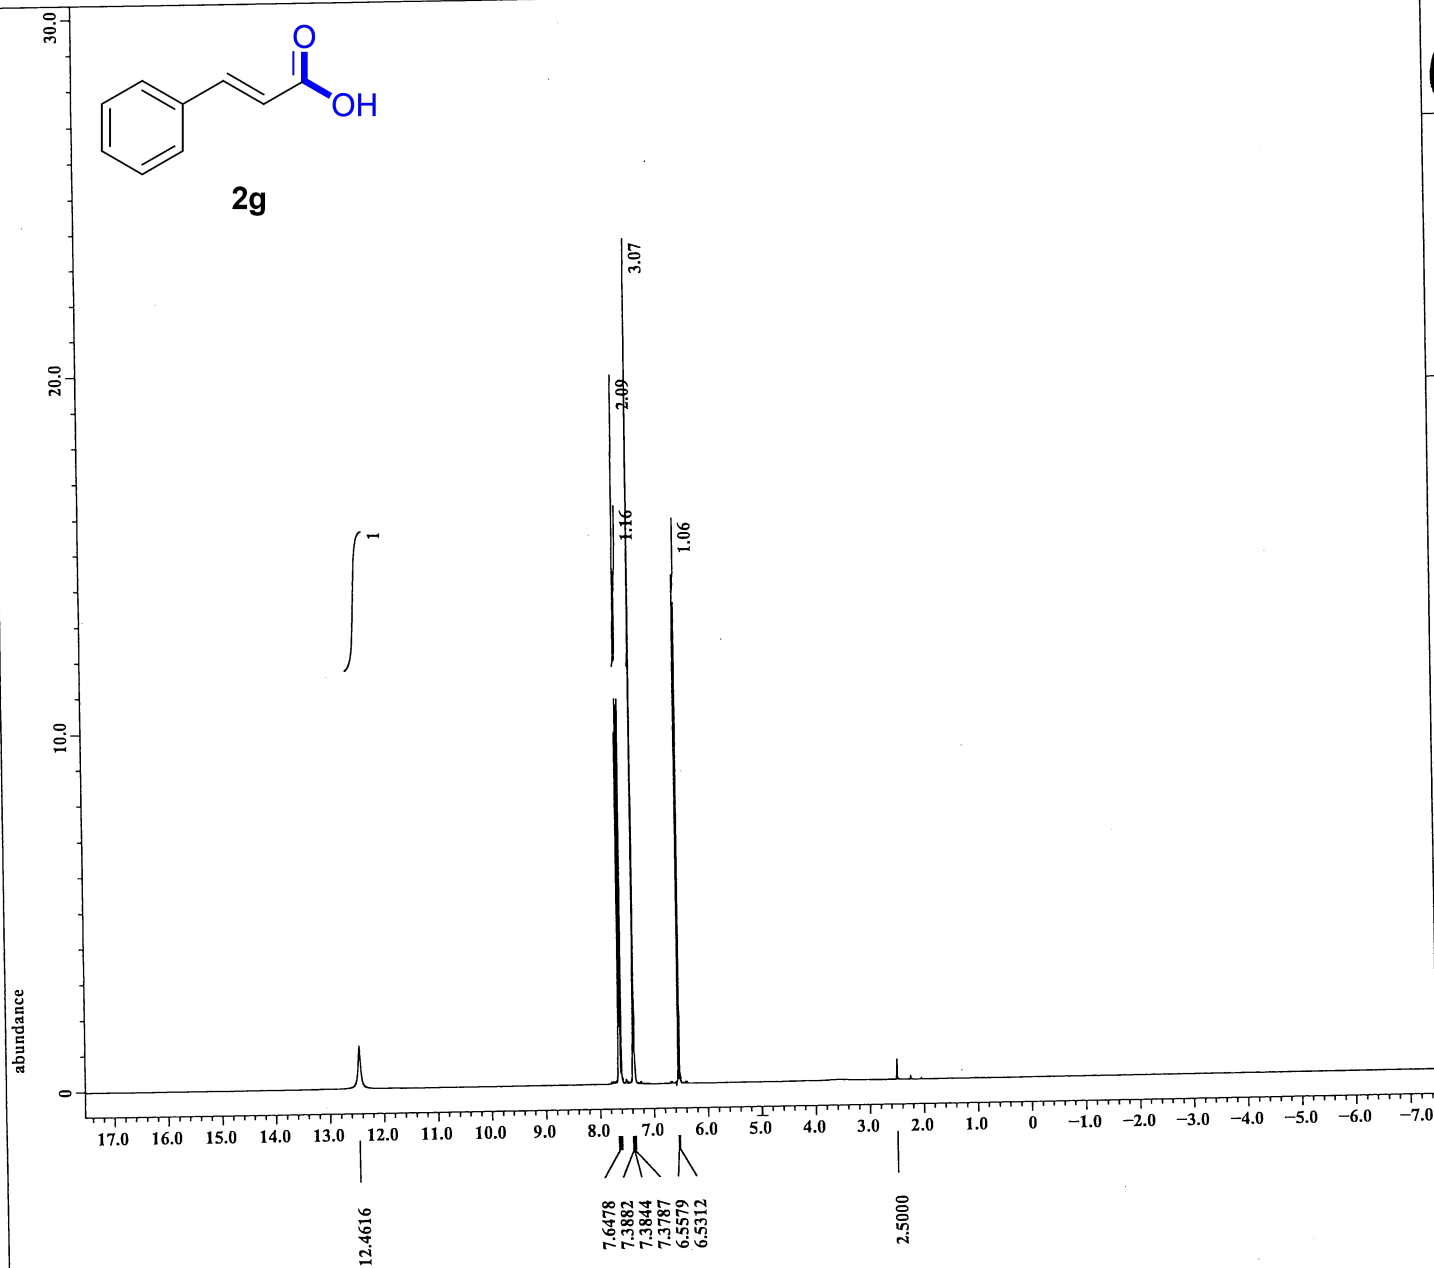

----- PROCESSING PARAMETERS -----

dc\_balance : 0 : FALSE  
 secp : 0.2[Hz] : 0.0[s]  
 trapezoid3 : 0[%] : 80[%] : 100[%]  
 zerofill : 1  
 fft : 1 : TRUE : TRUE  
 machinephase  
 ppm

Derived from: Exp-R-124-8-1-P-1.jdf

Filename = Exp-R-124-8-1-P-4.jdf  
 Author = delta  
 Experiment = single\_pulse.ex2  
 Sample\_id = Exp-R-124-8-1-P  
 Solvent = DMSO-D6  
 Creation\_time = 12-DEC-2018 17:57:02  
 Revision\_time = 12-DEC-2018 18:07:36  
 Current\_time = 12-DEC-2018 18:08:43

Comment = Exp-R-124-8-1-P  
 Data\_format = 1D COMPLEX  
 Dim\_size = 13107  
 Dim\_title = 1H  
 Dim\_units = [ppm]  
 Dimensions = X  
 Site = ECA 600  
 Spectrometer = DELTA2\_NMR

Field\_strength = 14.09636928 [T] (600 [M  
 X\_acq\_duration = 0.87293952 [s]  
 X\_domain = 1H  
 X\_freq = 600.1723046 [MHz]  
 X\_offset = 5 [ppm]  
 X\_points = 16384  
 X\_prescans = 1  
 X\_resolution = 1.14555473 [Hz]  
 X\_sweep = 18.76876877 [kHz]  
 Irr\_domain = 1H  
 Irr\_freq = 600.1723046 [MHz]  
 Irr\_offset = 5 [ppm]  
 Tri\_domain = 1H  
 Tri\_freq = 600.1723046 [MHz]  
 Tri\_offset = 5 [ppm]  
 Clipped = FALSE  
 Mod\_return = 1  
 Scans = 8  
 Total\_scans = 8

X\_90\_width = 13.17 [us]  
 X\_acq\_time = 0.87293952 [s]  
 X\_angle = 45 [deg]  
 X\_atn = 3.4 [dB]  
 X\_atn = 6.585 [us]  
 X\_pulse = Off  
 Irr\_mode = Off  
 Tri\_mode = Off  
 Dante\_presat = FALSE  
 Initial\_wait = 1 [s]  
 Recvr\_gain = 30  
 Relaxation\_delay = 5 [s]  
 Repetition\_time = 5.87293952 [s]  
 Temp\_get = 20.5 [dC]

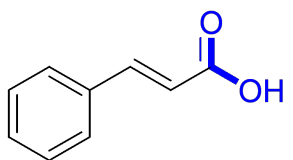

2g

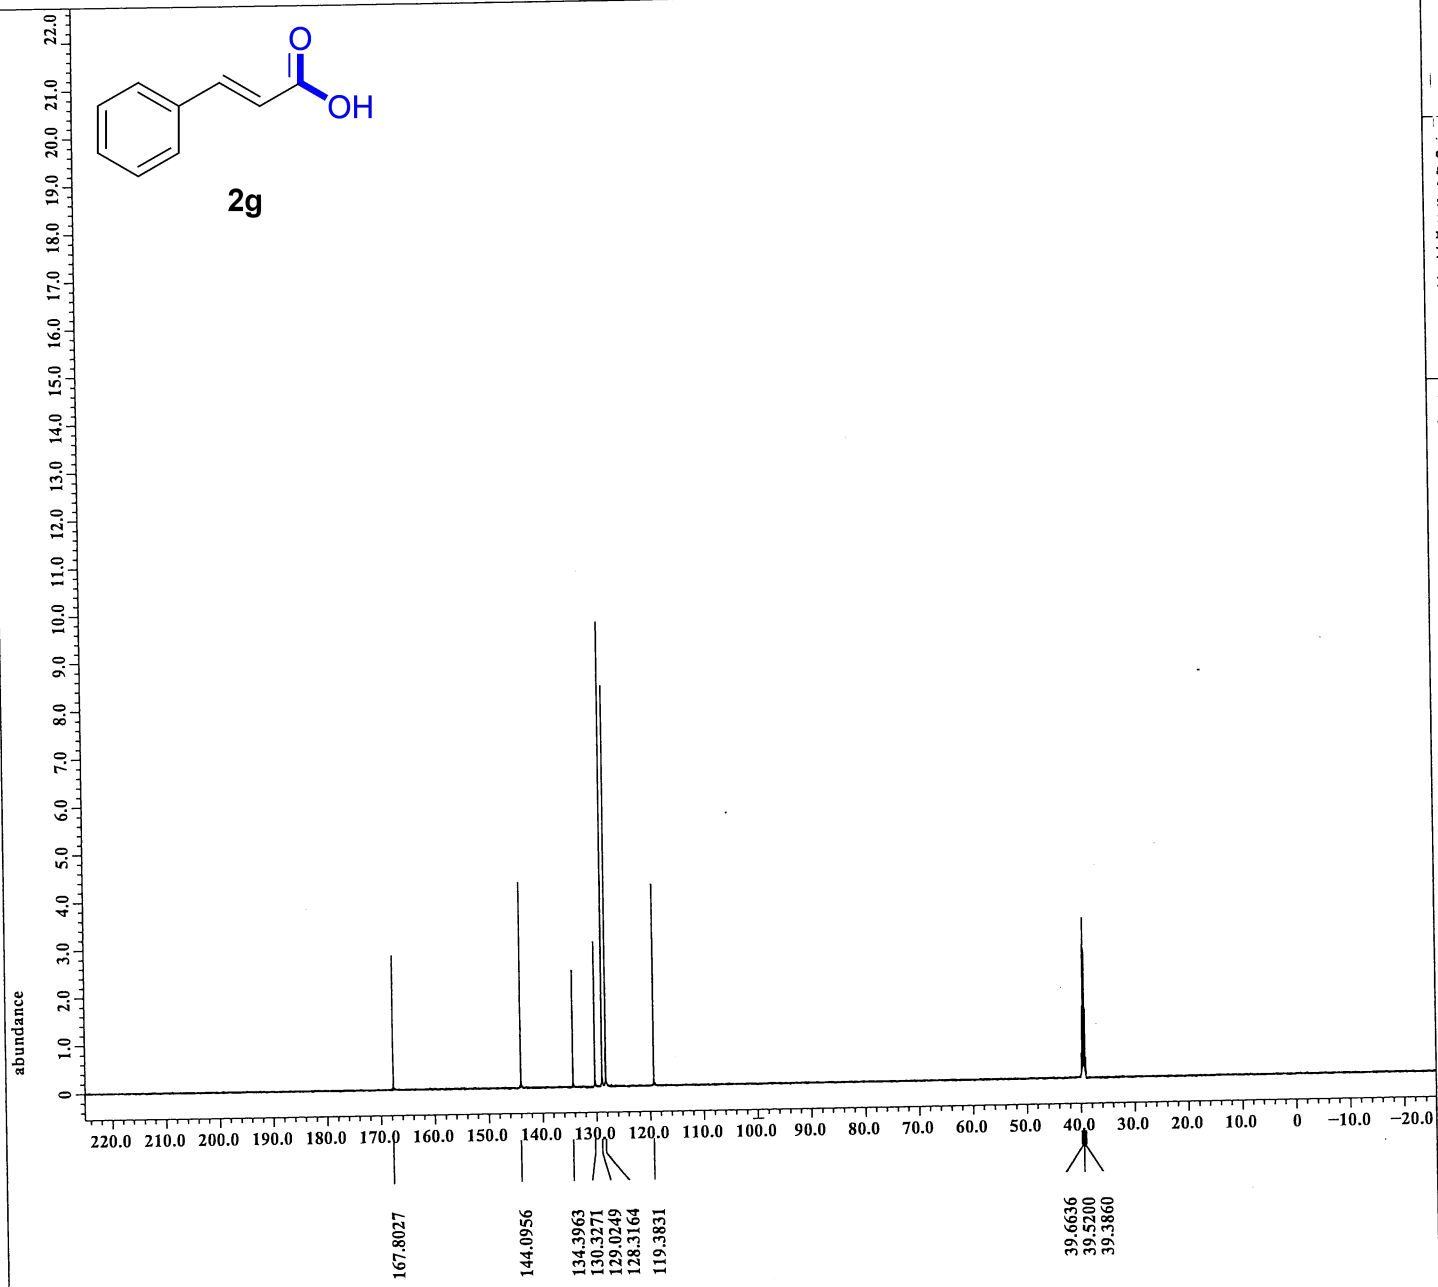

X : parts per Million : 13C

```

----- PROCESSING PARAMETERS -----
dc_balance : 0 : FALSE
sexp : 2.0 [Hz] : 0.0 [s]
trapezoid3 : 0 [%] : 80 [%] : 100 [%]
zerofill : 1
fft : 1 : TRUE : TRUE
machinephase
ppm

```

Derived from: Exp-R-124-8-1-C-1.jdf

```

Filename      = Exp-R-124-8-1-C-3.jdf
Author       = delta
Experiment   = single_pulse_dec
Sample_id    = Exp-R-124-8-1-C
Solvent      = DMSO-D6
Creation time = 12-DEC-2018 18:03:00
Revision time = 12-DEC-2018 18:06:19
Current_time = 12-DEC-2018 18:07:20

```

```

Comment      = Exp-R-124-8-1-C
Data_format  = 1D COMPLEX
Dim_size     = 26214
Dim_title    = 13C
Dim_units    = [ppm]
Dimensions   = X
Site         = ECA 600
Spectrometer = DELTA2_NMR

```

```

Field_strength = 14.09636928 [T] (600 [M])
X_acq_duration = 0.69206016 [s]
X_domain       = 13C
X_freq         = 150.91343039 [MHz]
X_offset       = 100 [ppm]
X_points       = 32768
X_prescans     = 4
X_resolution   = 1.44496109 [Hz]
X_sweep        = 47.34848485 [kHz]
Irr_domain     = 1H
Irr_freq       = 600.1723046 [MHz]
Irr_offset     = 5 [ppm]
Clipped        = FALSE
Mod_return     = 1
Scans          = 117
Total_scans    = 117

```

```

X_90_width    = 12.7 [us]
X_acq_time     = 0.69206016 [s]
X_angle        = 30 [deg]
X_atn          = 7.5 [dB]
X_pulse        = 4.23333333 [us]
Irr_atn_dec    = 18.62 [dB]
Irr_atn_noe    = 18.62 [dB]
Irr_noise      = WALTZ
Decoupling     = TRUE
Initial_wait   = 1 [s]
Noe            = TRUE
Noe_time       = 2 [s]
Recvr_gain     = 60
Relaxation_delay = 2 [s]
Repetition_time = 2.69206016 [s]
Temp_get       = 21.3 [dC]

```

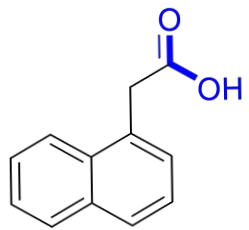

2h

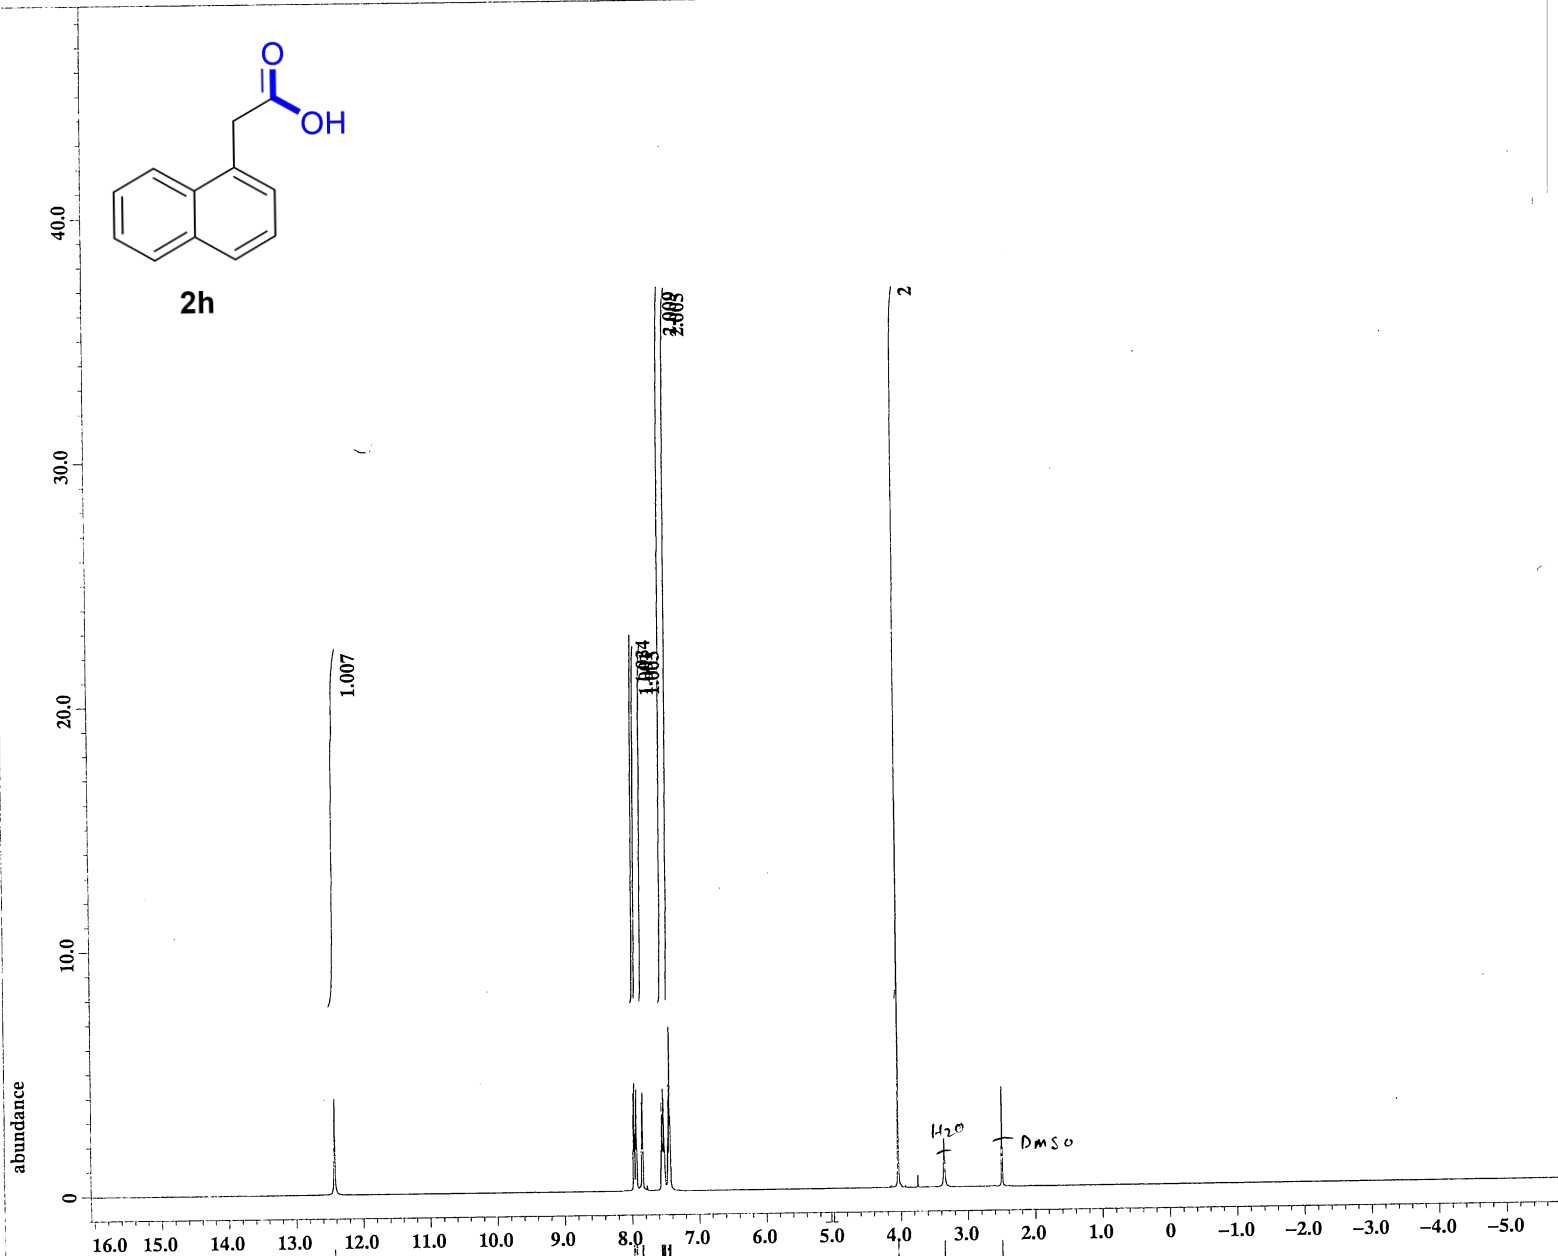

X : parts per Million : 1H

Sample\_id = Exp-R-124-1-nap-aceti  
 Solvent = DMSO-D6  
 Creation\_time = 21-SEP-2018 19:42:34  
 Revision\_time = 21-SEP-2018 19:51:45  
 Current\_time = 21-SEP-2018 19:51:48

Content = Exp-R-124-1-nap-aceti  
 Data\_format = 1D COMPLEX  
 Dim\_size = 13107  
 Dim\_title = 1H  
 Dim\_units = [ppm]  
 Dimensions = X  
 Site = ECA 600  
 Spectrometer = DELTA2\_NMR

Field\_strength = 14.09636928[T] (600[M]  
 X\_acq\_duration = 0.99090432[s]  
 X\_domain = 1H  
 X\_freq = 600.1723046[MHz]  
 X\_offset = 5[ppm]  
 X\_points = 16384  
 X\_prescans = 1  
 X\_resolution = 1.00917917[Hz]  
 X\_sweep = 16.53439153[kHz]  
 Irr\_domain = 1H  
 Irr\_freq = 600.1723046[MHz]  
 Irr\_offset = 5[ppm]  
 Tri\_domain = 1H  
 Tri\_freq = 600.1723046[MHz]  
 Tri\_offset = 5[ppm]  
 Clipped = FALSE  
 Mod\_return = 1  
 Scans = 8  
 Total\_scans = 8

X\_90\_width = 12.68[us]  
 X\_acq\_time = 0.99090432[s]  
 X\_angle = 45[deg]  
 X\_atn = 3.4[dB]  
 X\_pulse = 6.34[us]  
 Irr\_mode = Off  
 Tri\_mode = Off  
 Dante\_presat = FALSE  
 Initial\_wait = 1[s]  
 Recvr\_gain = 50  
 Relaxation\_delay = 5[s]  
 Repetition\_time = 5.99090432[s]  
 Temp\_get = 21.3[dC]

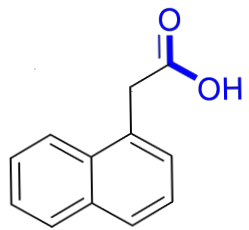

2h

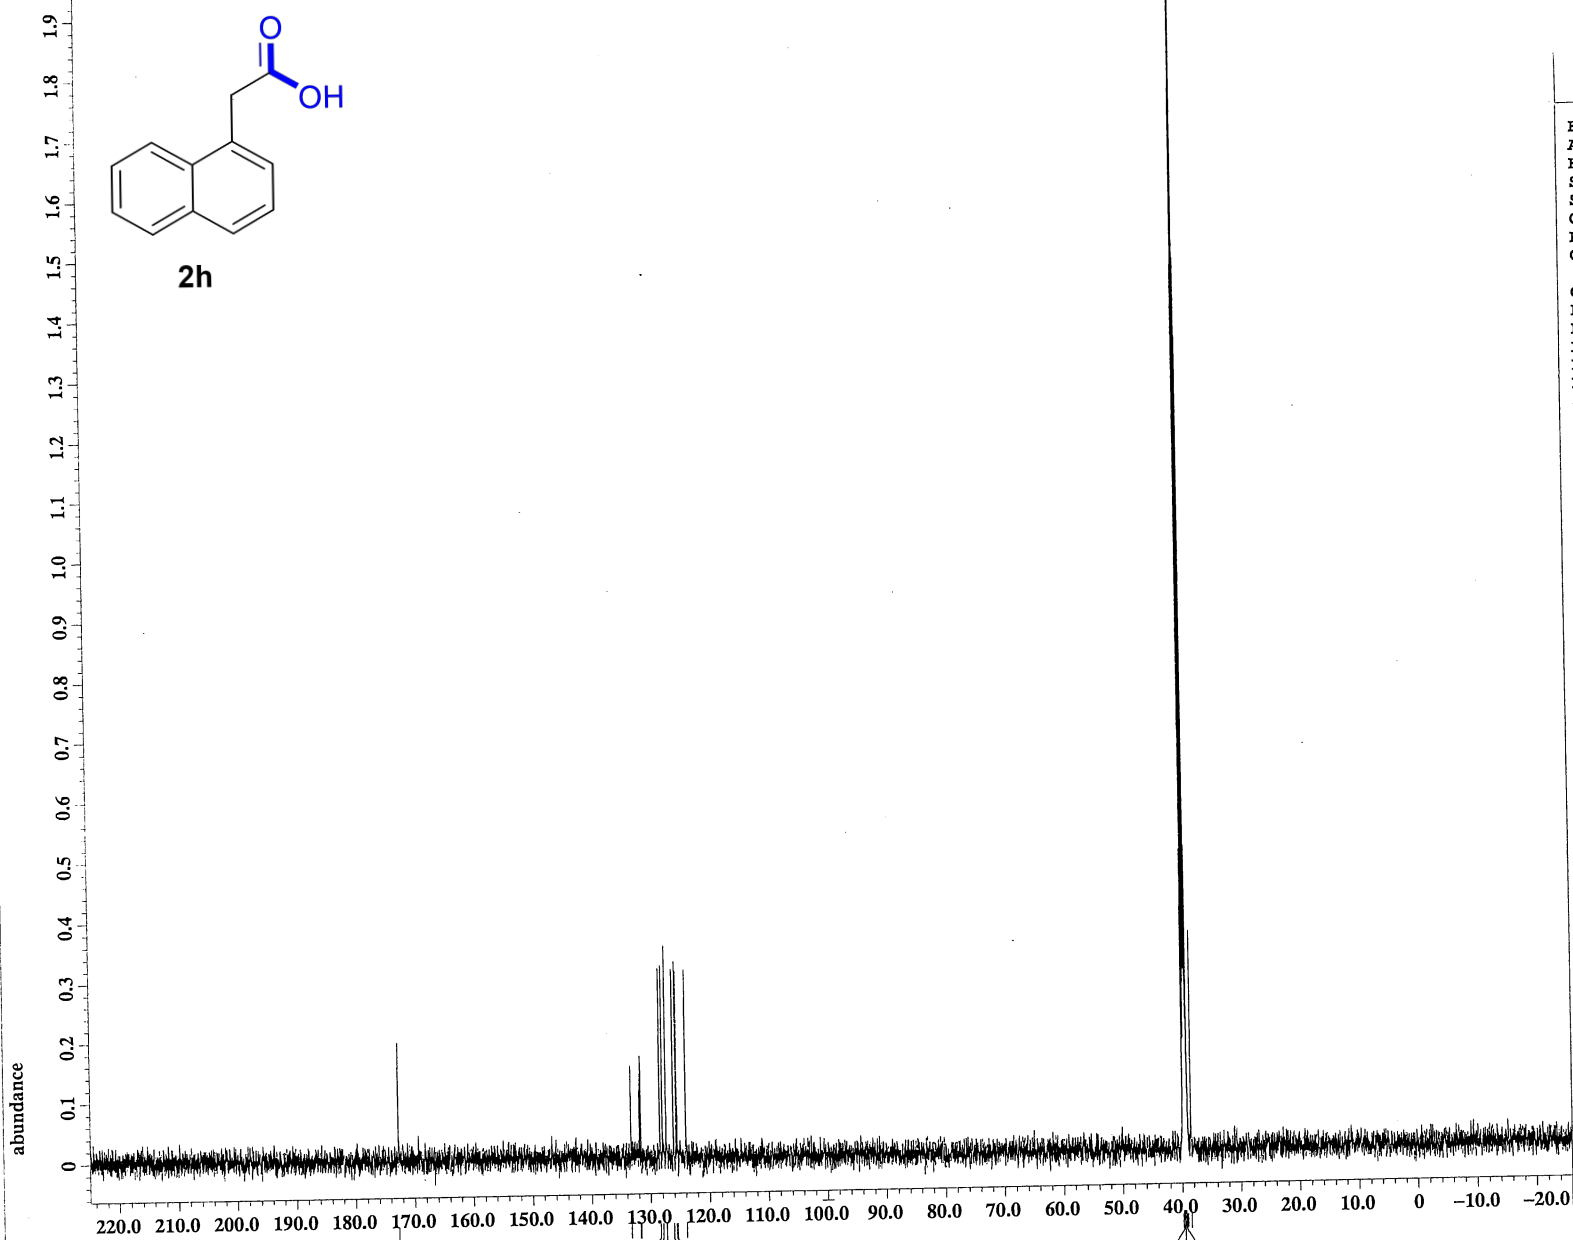

172.7816

128.4600  
128.0100  
127.4068  
126.1812  
125.7216

39.6636  
39.5200  
39.3860

X : parts per Million : 13C

Filename = Exp-R-124-1-nap-aceti  
Author = delta  
Experiment = single\_pulse\_dec  
Sample\_id = Exp-R-124-1-nap-aceti  
Solvent = DMSO-D6  
Creation\_time = 21-SEP-2018 19:46:35  
Revision\_time = 21-SEP-2018 19:53:37  
Current\_time = 21-SEP-2018 19:53:58

Content = Exp-R-124-1-nap-aceti  
Data\_format = 1D COMPLEX  
Dim\_size = 26214  
Dim\_title = 13C  
Dim\_units = [ppm]  
Dimensions = X  
Site = ECA 600  
Spectrometer = DELTA2\_NMR

Field\_strength = 14.09636928[T] (600[M]  
X\_acq\_duration = 0.69206016[s]  
X\_domain = 13C  
X\_freq = 150.91343039[MHz]  
X\_offset = 100[ppm]  
X\_points = 32768  
X\_prescans = 4  
X\_resolution = 1.44496109[Hz]  
X\_sweep = 47.34848485[kHz]  
Irr\_domain = 1H  
Irr\_freq = 600.1723046[MHz]  
Irr\_offset = 5[ppm]  
Clipped = FALSE  
Mod\_return = 1  
Scans = 60  
Total\_scans = 60

X\_90\_width = 12[us]  
X\_acq\_time = 0.69206016[s]  
X\_angle = 30[deg]  
X\_atn = 7.5[dB]  
X\_pulse = 4[us]  
Irr\_atn\_dec = 18.95[dB]  
Irr\_atn\_noe = 18.95[dB]  
Irr\_noise = WALTZ  
Decoupling = TRUE  
Initial\_wait = 1[s]  
Noe = TRUE  
Noe\_time = 2.5[s]  
Recvr\_gain = 60  
Relaxation\_delay = 2.5[s]  
Repetition\_time = 3.19206016[s]  
Temp\_get = 22[dc]

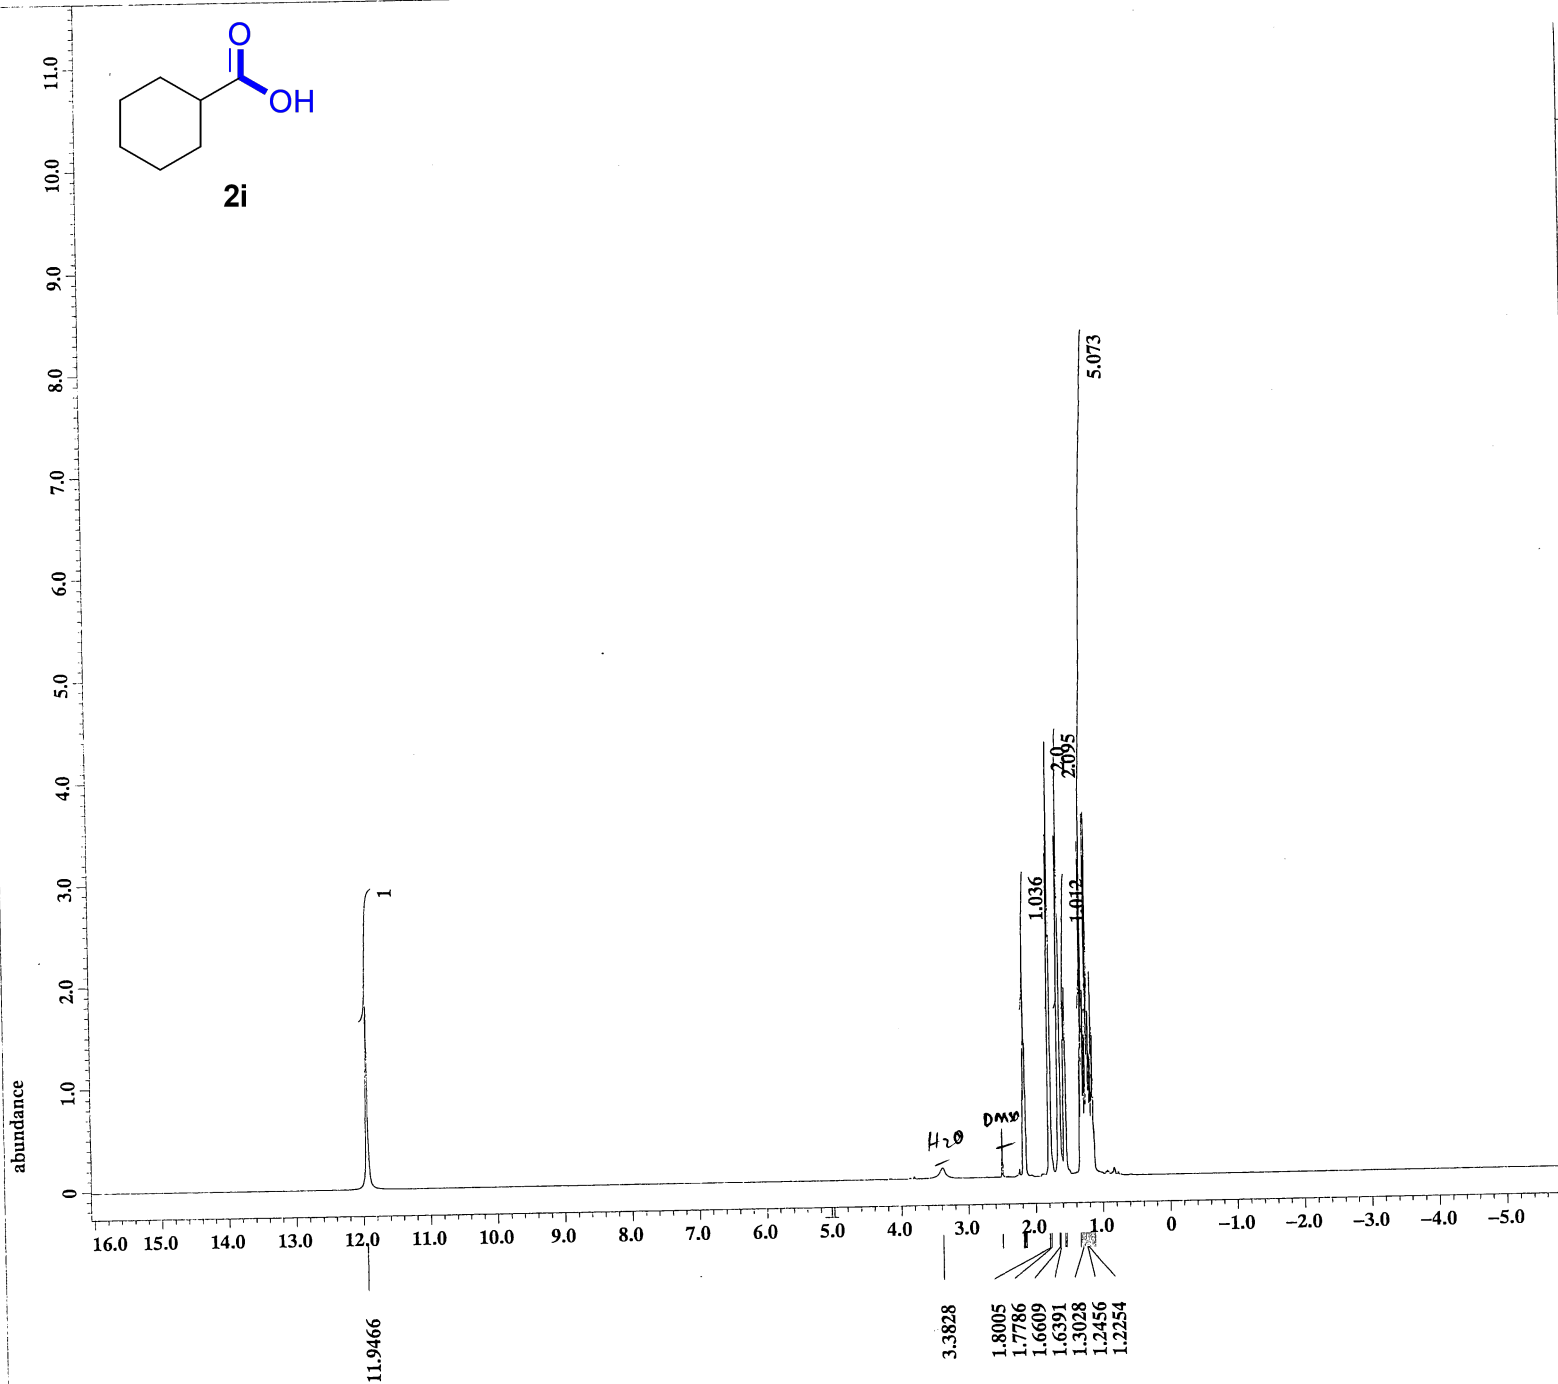

```

Filename      = Exp-R-124-5a-proton-4
Author       = delta
Experiment   = single_pulse.ex2
Sample_id    = Exp-R-124-5a-proton
Solvent      = DMSO-D6
Creation_time = 20-SEP-2018 13:05:22
Revision_time = 20-SEP-2018 13:18:43
Current_time  = 20-SEP-2018 13:18:46
  
```

```

Content       = Exp-R-124-5a-proton
Data_format   = 1D_COMPLEX
Dim_size      = 13107
Dim_title     = 1H
Dim_units     = [ppm]
Dimensions    = X
Site          = ECA 600
Spectrometer  = DELTA2_NMR
  
```

```

Field_strength = 14.09636928[T] (600[M]
X_acq_duration = 0.99090432[s]
X_domain       = 1H
X_freq         = 600.1723046[MHz]
X_offset       = 5[ppm]
X_points       = 16384
X_prescans     = 1
X_resolution   = 1.00917917[Hz]
X_sweep        = 16.53439153[kHz]
Irr_domain     = 1H
Irr_freq       = 600.1723046[MHz]
Irr_offset     = 5[ppm]
Tri_domain     = 1H
Tri_freq       = 600.1723046[MHz]
Tri_offset     = 5[ppm]
Clipped        = FALSE
Mod_return     = 1
Scans          = 8
Total_scans    = 8
  
```

```

X_90_width     = 12.68[us]
X_acq_time      = 0.99090432[s]
X_angle         = 45[deg]
X_atn           = 3.4[db]
X_pulse         = 6.34[us]
Irr_mode        = Off
Tri_mode        = Off
Dante_presat   = FALSE
Initial_wait    = 1[s]
Recvr_gain      = 32
Relaxation_delay = 5[s]
Repetition_time = 5.99090432[s]
Temp_get        = 22.1[dc]
  
```

X : parts per Million : 1H

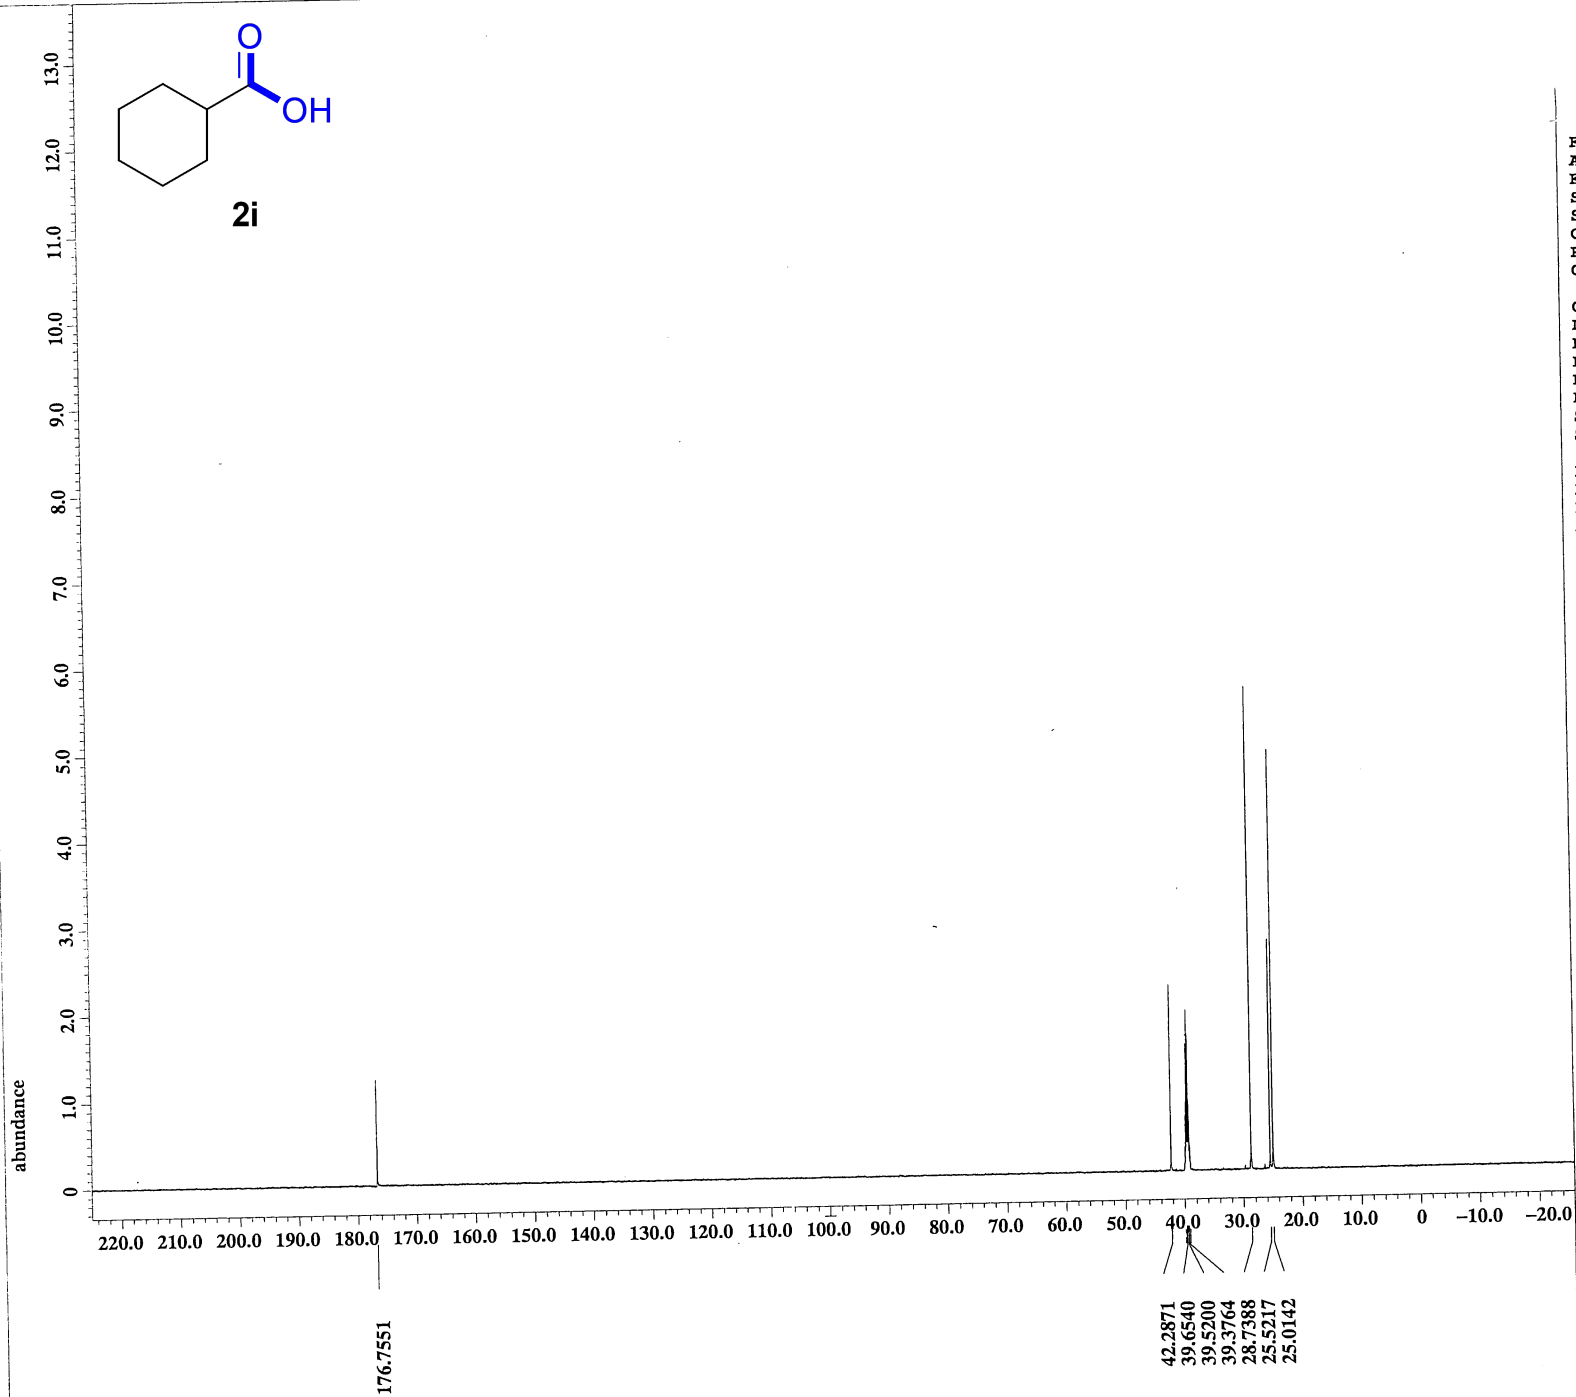

```

Filename      = Exp-R-124-5a-C-3.jdf
Author       = delta
Experiment   = single_pulse_dec
Sample_id    = Exp-R-124-5a-C
Solvent      = DMSO-D6
Creation_time = 20-SEP-2018 13:14:47
Revision_time = 20-SEP-2018 13:21:15
Current_time  = 20-SEP-2018 13:23:00

Content      = Exp-R-124-5a-C
Data_format  = 1D COMPLEX
Dim_size     = 26214
Dim_title    = 13C
Dim_units    = [ppm]
Dimensions   = X
Site         = ECA 600
Spectrometer = DELTA2_NMR

Field_strength = 14.09636928[T] (600[M]
X_acq_duration = 0.69206016[s]
X_domain       = 13C
X_freq         = 150.91343039[MHz]
X_offset       = 100[ppm]
X_points       = 32768
X_prescans    = 4
X_resolution   = 1.44496109[Hz]
X_sweep        = 47.34848485[kHz]
Irr_domain     = 1H
Irr_freq       = 600.1723046[MHz]
Irr_offset     = 5[ppm]
Clipped        = FALSE
Mod_return     = 1
Scans          = 194
Total_scans    = 194

X_90_width    = 12[us]
X_acq_time    = 0.69206016[s]
X_angle       = 30[deg]
X_atn         = 7.5[dB]
X_pulse       = 4[us]
Irr_atn_dec   = 18.95[dB]
Irr_atn_noe   = 18.95[dB]
Irr_noise     = WALTZ
Decoupling    = TRUE
Initial_wait  = 1[s]
Noe           = TRUE
Noe_time      = 2[s]
Recvr_gain    = 60
Relaxation_delay = 2[s]
Repetition_time = 2.69206016[s]
Temp_get      = 22.3[dC]

```

X : parts per Million : 13C

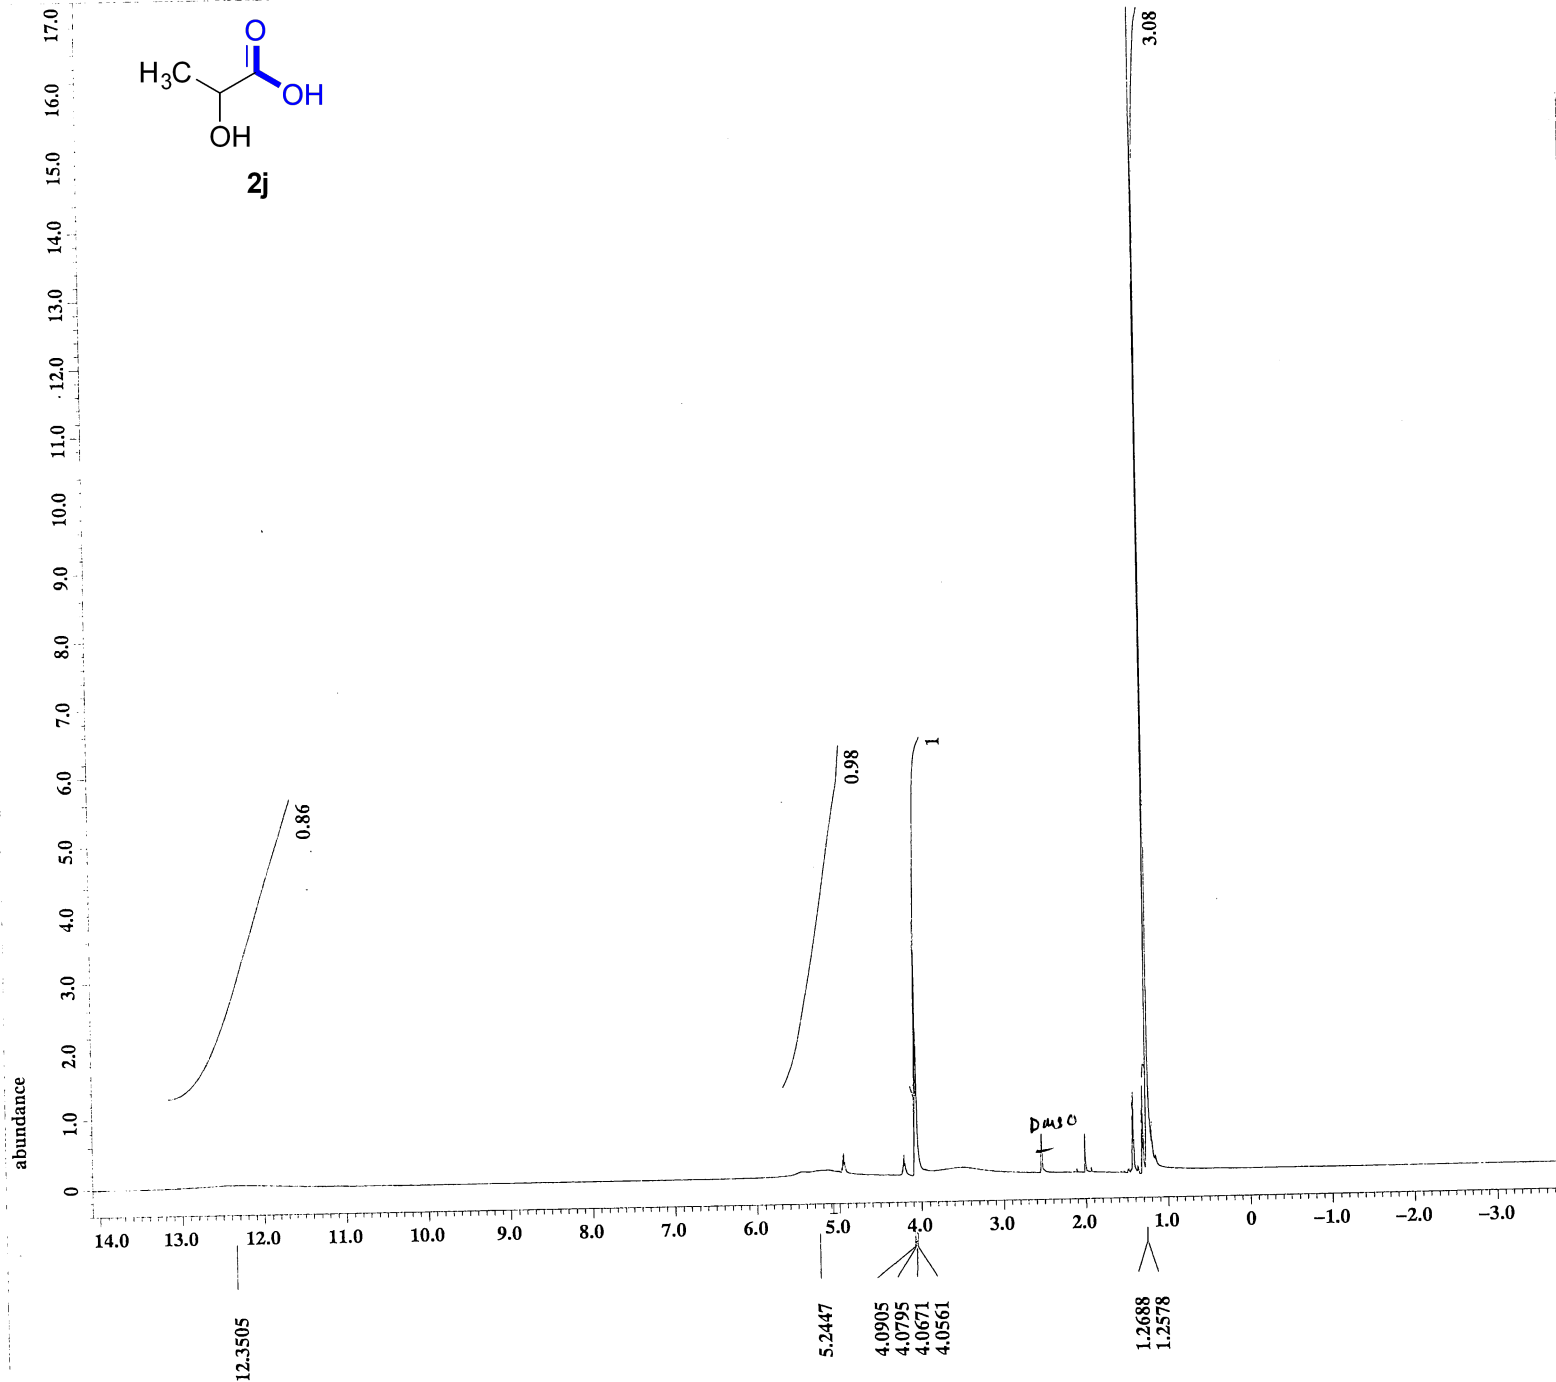

----- PROCESSING PARAMETERS -----  
 dc\_balance : 0 : FALSE  
 sexp : 0.2[Hz] : 0.0[s]  
 trapezoid3 : 0[%] : 80[%] : 100[%]  
 zerofill : 1  
 fft : 1 : TRUE : TRUE  
 machinephase  
 ppm

Derived from: Exp-AB-R-124-6c-H-1.jdf

Filename = Exp-AB-R-124-6c-H-5.j  
 Author = delta  
 Experiment = single\_pulse.ex2  
 Sample\_id = Exp-AB-R-124-6c-H  
 Solvent = DMSO-D6  
 Creation\_time = 1-SEP-2020 16:21:20  
 Revision\_time = 2-SEP-2020 13:45:37  
 Current\_time = 2-SEP-2020 13:45:42

Comment = Exp-AB-R-124-6c-H  
 Data\_format = 1D\_COMPLEX  
 Dim\_size = 13107  
 Dim\_title = 1H  
 Dim\_units = [ppm]  
 Dimensions = X  
 Site = ECA 600  
 Spectrometer = DELTA2\_NMR

Field\_strength = 14.09636928[T] (600[M]  
 X\_acq\_duration = 1.21110528[s]  
 X\_domain = 1H  
 X\_freq = 600.1723046[MHz]  
 X\_offset = 5[ppm]  
 X\_points = 16384  
 X\_prescans = 1  
 X\_resolution = 0.82569205[Hz]  
 X\_sweep = 13.52813853[kHz]  
 Irr\_domain = 1H  
 Irr\_freq = 600.1723046[MHz]  
 Irr\_offset = 5[ppm]  
 Tri\_domain = 1H  
 Tri\_freq = 600.1723046[MHz]  
 Tri\_offset = 5[ppm]  
 Clipped = FALSE  
 Mod\_return = 1  
 Scans = 8  
 Total\_scans = 8

X\_90\_width = 13.17[us]  
 X\_acq\_time = 1.21110528[s]  
 X\_angle = 45[deg]  
 X\_atn = 3.4[dB]  
 X\_pulse = 6.585[us]  
 Irr\_mode = Off  
 Tri\_mode = Off  
 Dante\_presat = FALSE  
 Initial\_wait = 1[s]  
 Recvr\_gain = 36  
 Relaxation\_delay = 5[s]  
 Repetition\_time = 6.21110528[s]  
 Temp\_get = 21.4[dc]

X : parts per Million : 1H



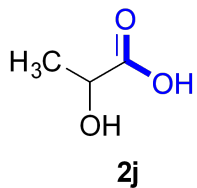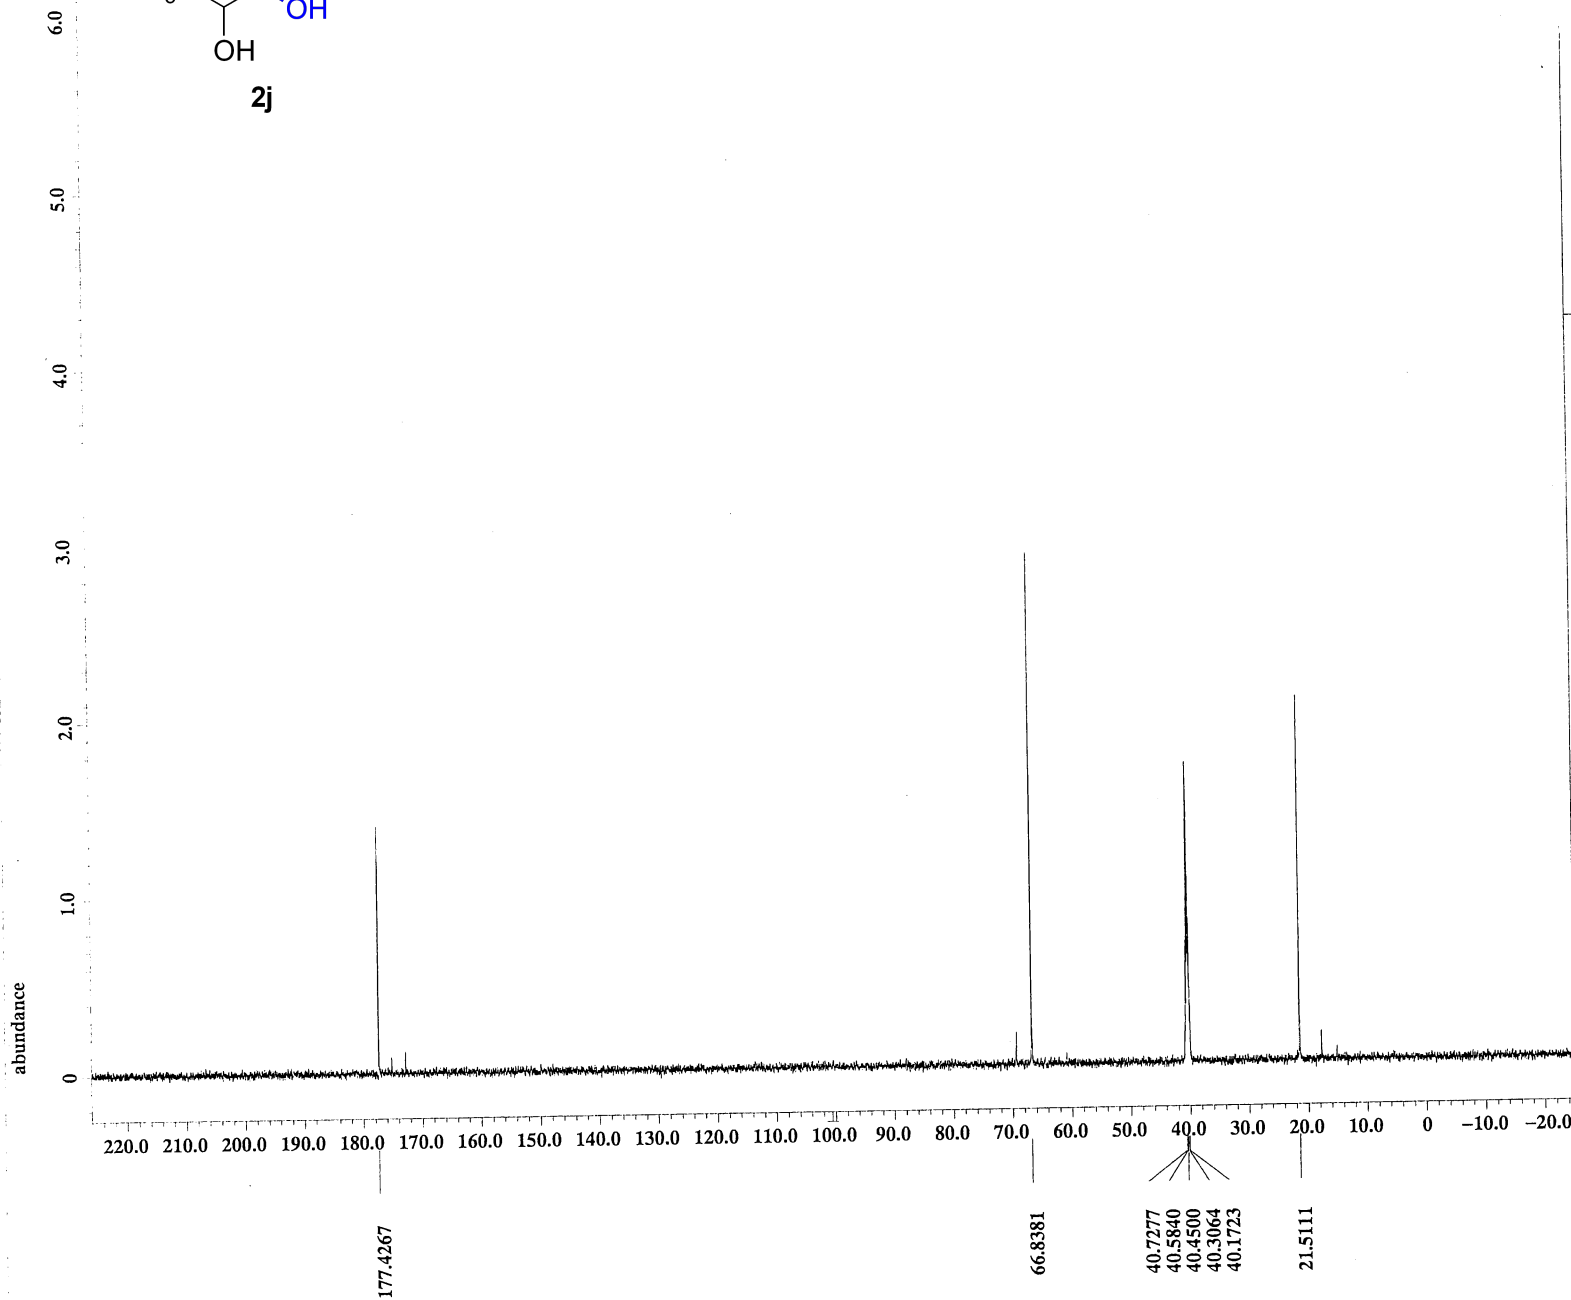

X : parts per Million : 13C

----- PROCESSING PARAMETERS -----  
 dc\_balance : 0 : FALSE  
 secp : 2.0 [Hz] : 0.0 [s]  
 trapezoid3 : 0 [%] : 80 [%] : 100 [%]  
 zerofill : 1  
 fft : 1 : TRUE : TRUE  
 machinephase  
 ppm

Derived from: Exp-AB-R-124-6c-C-1.jdf

Filename = Exp-AB-R-124-6c-C-4.j  
 Author = delta  
 Experiment = single\_pulse\_dec  
 Sample\_id = Exp-AB-R-124-6c-C  
 Solvent = DMSO-D6  
 Creation\_time = 1-SEP-2020 16:19:40  
 Revision\_time = 1-SEP-2020 16:26:08  
 Current\_time = 1-SEP-2020 16:26:22

Comment = Exp-AB-R-124-6c-C  
 Data\_format = 1D COMPLEX  
 Dim\_size = 26214  
 Dim\_title = 13C  
 Dim\_units = [ppm]  
 Dimensions = X  
 Site = ECA 600  
 Spectrometer = DELTA2\_NMR

Field\_strength = 14.09636928 [T] (600 [M])  
 X\_acq\_duration = 0.69206016 [s]  
 X\_domain = 13C  
 X\_freq = 150.91343039 [MHz]  
 X\_offset = 100 [ppm]  
 X\_points = 32768  
 X\_prescans = 4  
 X\_resolution = 1.44496109 [Hz]  
 X\_sweep = 47.34848485 [kHz]  
 Irr\_domain = 1H  
 Irr\_freq = 600.1723046 [MHz]  
 Irr\_offset = 5 [ppm]  
 Clipped = FALSE  
 Mod\_return = 1  
 Scans = 43  
 Total\_scans = 43

X\_90\_width = 12.3 [us]  
 X\_acq\_time = 0.69206016 [s]  
 X\_angle = 30 [deg]  
 X\_atn = 7.5 [dB]  
 X\_pulse = 4.1 [us]  
 Irr\_atn\_dec = 18.62 [dB]  
 Irr\_atn\_noe = 18.62 [dB]  
 Irr\_noise = WALTZ  
 Decoupling = TRUE  
 Initial\_wait = 1 [s]  
 Noe = TRUE  
 Noe\_time = 2 [s]  
 Recvr\_gain = 60  
 Relaxation\_delay = 2 [s]  
 Repetition\_time = 2.69206016 [s]  
 Temp\_get = 21.7 [dC]

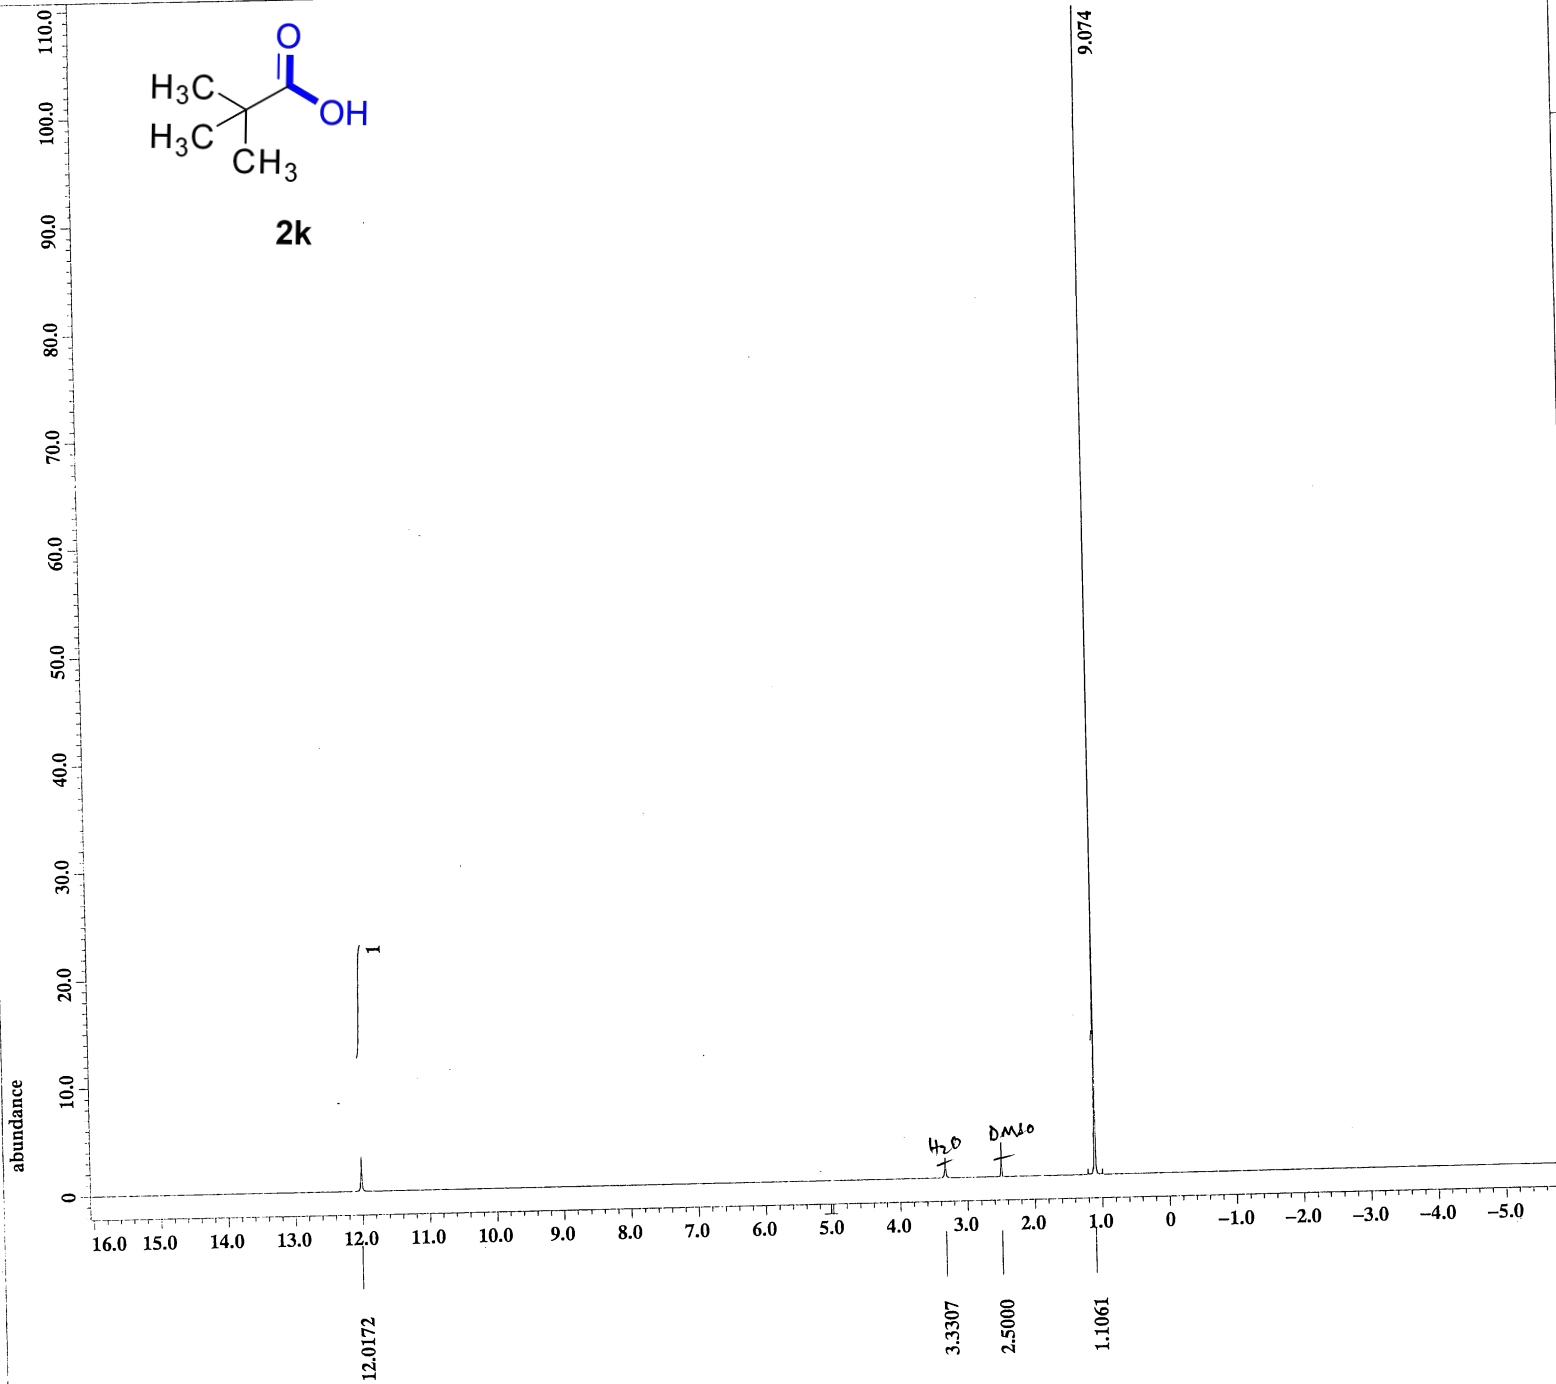

```

Filename      = Exp-R-124-4a-proton-5
Author       = delta
Experiment   = single_pulse.ex2
Sample_id    = Exp-R-124-4a-proton
Solvent      = DMSO-D6
Creation_time = 20-SEP-2018 12:50:42
Revision_time = 20-SEP-2018 13:03:14
Current_time  = 20-SEP-2018 13:03:20
  
```

```

Content       = Exp-R-124-4a-proton
Data_format  = 1D COMPLEX
Dim_size     = 13107
Dim_title    = 1H
Dim_units    = [ppm]
Dimensions   = X
Site         = ECA 600
Spectrometer = DELTA2_NMR
  
```

```

Field_strength = 14.09636928[T] (600[M]
X_acq_duration = 0.99090432[s]
X_domain       = 1H
X_freq         = 600.1723046[MHz]
X_offset       = 5 [ppm]
X_points       = 16384
X_prescans     = 1
X_resolution   = 1.00917917 [Hz]
X_sweep        = 16.53439153 [kHz]
Irr_domain     = 1H
Irr_freq       = 600.1723046 [MHz]
Irr_offset     = 5 [ppm]
Tri_domain     = 1H
Tri_freq       = 600.1723046 [MHz]
Tri_offset     = 5 [ppm]
Clipped        = FALSE
Mod_return     = 1
Scans          = 8
Total_scans    = 8
  
```

```

X_90_width    = 12.68 [us]
X_acq_time     = 0.99090432 [s]
X_angle        = 45 [deg]
X_atn          = 3.4 [dB]
X_pulse        = 6.34 [us]
Irr_mode       = Off
Tri_mode       = Off
Dante_presat   = FALSE
Initial_wait   = 1 [s]
Recvr_gain     = 48
Relaxation_delay = 5 [s]
Repetition_time = 5.99090432 [s]
Temp_get       = 22.3 [dC]
  
```

X : parts per Million : 1H

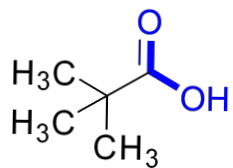

2k

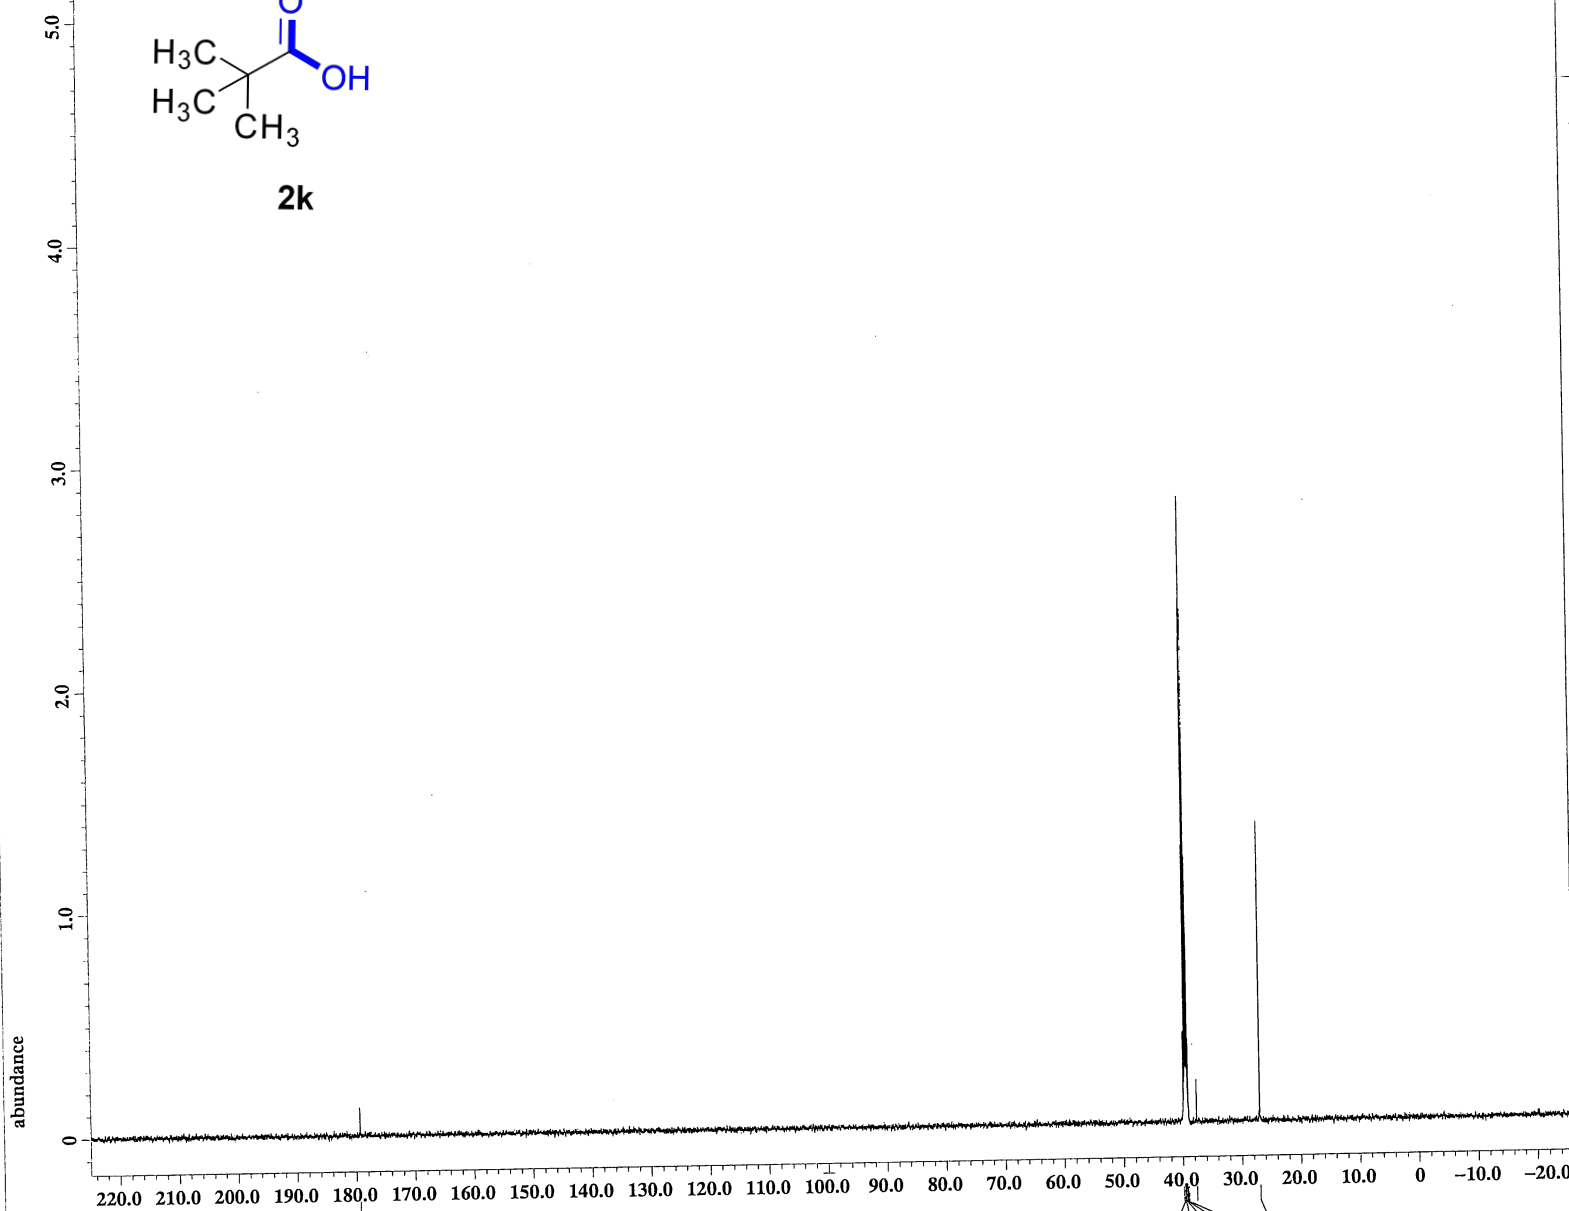

X : parts per Million : 13C

```

Filename      = Exp-R-124-4a-Carbon-3
Author       = delta
Experiment   = single_pulse_dec
Sample_id    = Exp-R-124-4a-Carbon
Solvent      = DMSO-D6
Creation_time = 20-SEP-2018 12:57:33
Revision_time = 20-SEP-2018 13:03:57
Current_time  = 20-SEP-2018 13:04:06

Content      = Exp-R-124-4a-Carbon
Data_format  = 1D_COMPLEX
Dim_size     = 26214
Dim_title    = 13C
Dim_units    = [ppm]
Dimensions   = X
Site         = ECA 600
Spectrometer = DELTA2_NMR

Field_strength = 14.09636928[T] (600[M]
X_acq_duration = 0.69206016[s]
X_domain       = 13C
X_freq         = 150.91343039[MHz]
X_offset       = 100[ppm]
X_points       = 32768
X_prescans     = 4
X_resolution   = 1.44496109[Hz]
X_sweep        = 47.34848485[kHz]
Irr_domain     = 1H
Irr_freq       = 600.1723046[MHz]
Irr_offset     = 5[ppm]
Clipped        = FALSE
Mod_return     = 1
Scans          = 137
Total_scans    = 137

X_90_width    = 12[us]
X_acq_time    = 0.69206016[s]
X_angle       = 30[deg]
X_atn         = 7.5[dB]
X_pulse       = 4[us]
Irr_atn_dec   = 18.95[dB]
Irr_atn_noe   = 18.95[dB]
Irr_noise     = WALTZ
Decoupling    = TRUE
Initial_wait   = 1[s]
Noe           = TRUE
Noe_time      = 2[s]
Recvr_gain    = 60
Relaxation_delay = 2[s]
Repetition_time = 2.69206016[s]
Temp_get      = 22.4[dC]

```

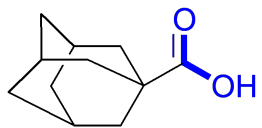

21

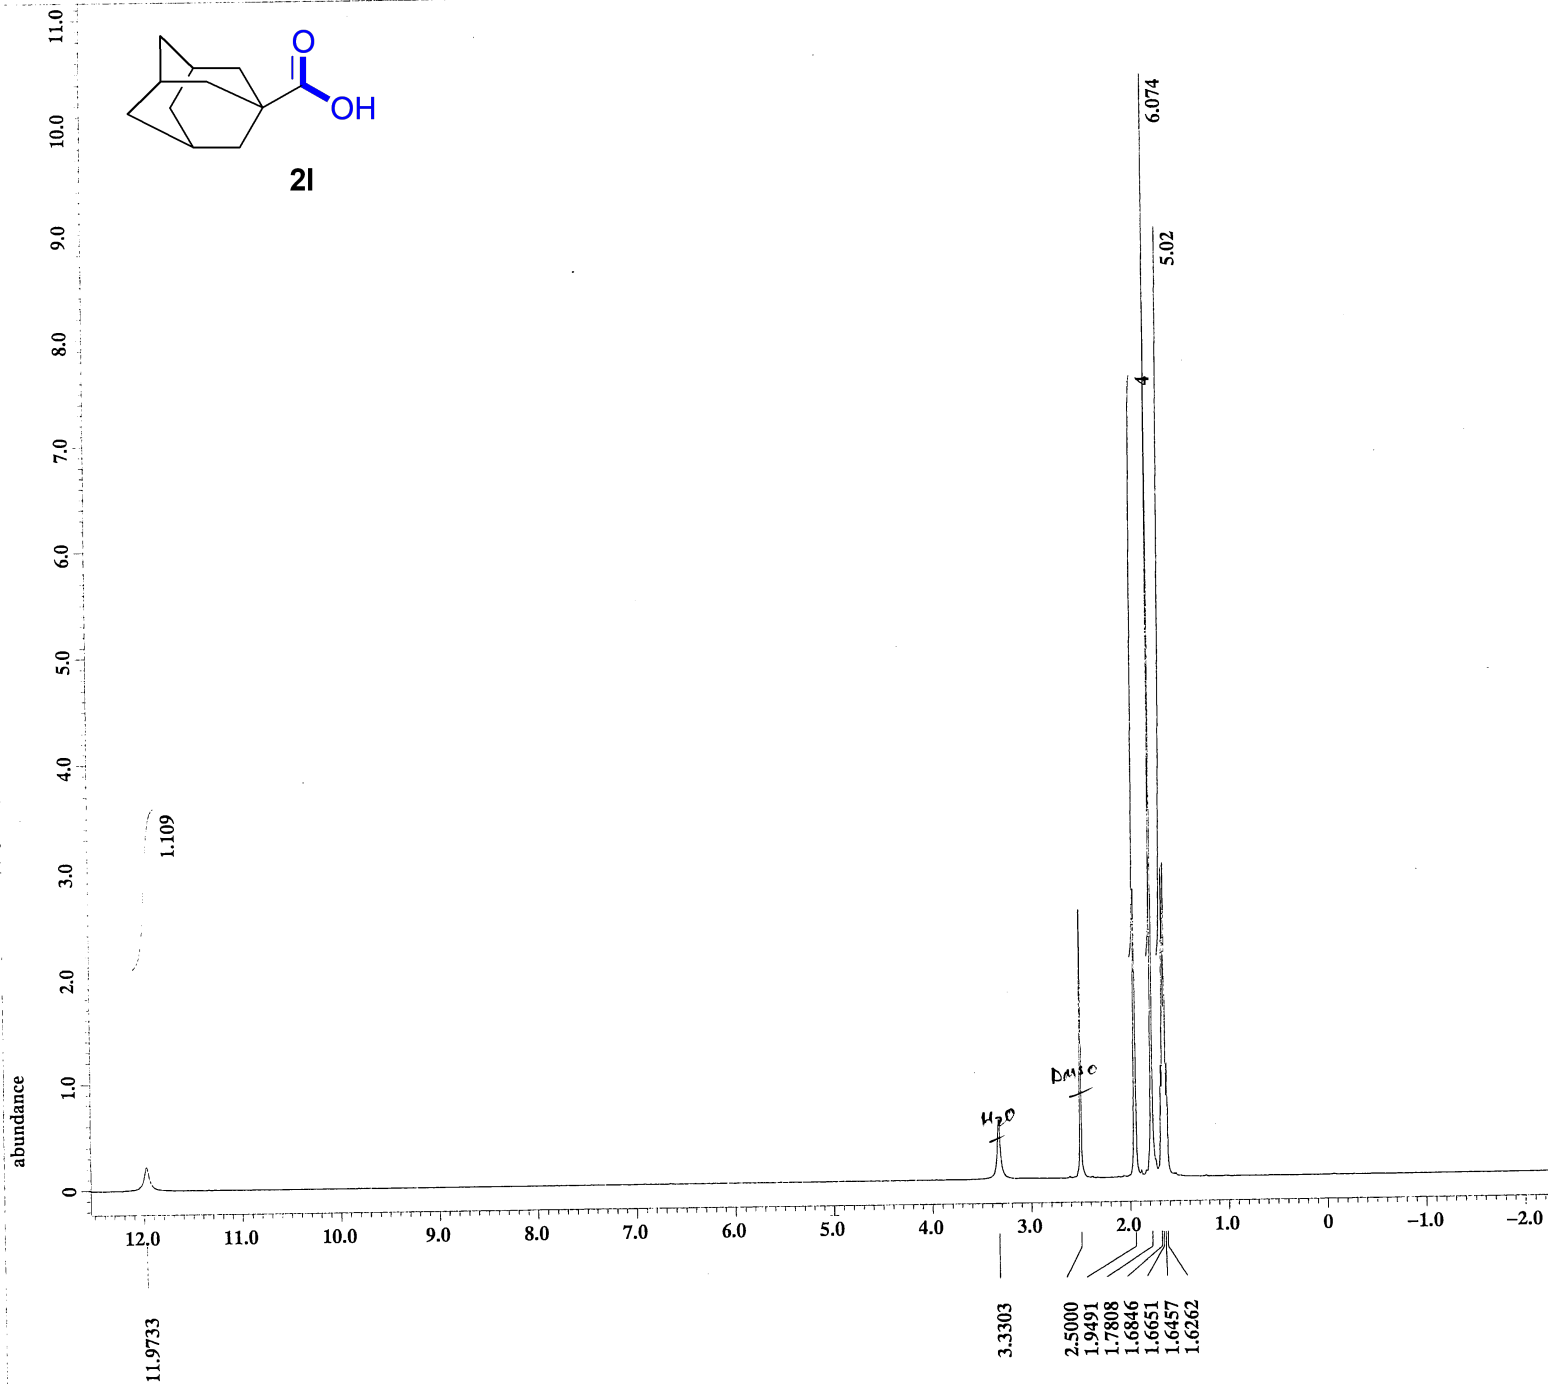

X : parts per Million : 1H

Filename = Exp-R-122-3aDMSO-P-4.  
 Author = delta  
 Experiment = single\_pulse.ex2  
 Sample\_id = Exp-R-122-3aDMSO-P  
 Solvent = DMSO-D6  
 Creation\_time = 31-JUL-2018 18:14:27  
 Revision\_time = 31-JUL-2018 18:47:30  
 Current\_time = 31-JUL-2018 18:47:39

Content = Exp-R-122-3aDMSO-P  
 Data\_format = 1D\_COMPLEX  
 Dim\_size = 13107  
 Dim\_title = 1H  
 Dim\_units = [ppm]  
 Dimensions = X  
 Site = ECA 600  
 Spectrometer = DELTA2\_NMR

Field\_strength = 14.09636928[T] (600[M]  
 X\_acq\_duration = 1.4548992[s]  
 X\_domain = 1H  
 X\_freq = 600.1723046[MHz]  
 X\_offset = 5[ppm]  
 X\_points = 16384  
 X\_prescans = 1  
 X\_resolution = 0.68733284[Hz]  
 X\_sweep = 11.26126126[kHz]  
 Irr\_domain = 1H  
 Irr\_freq = 600.1723046[MHz]  
 Irr\_offset = 5[ppm]  
 Tri\_domain = 1H  
 Tri\_freq = 600.1723046[MHz]  
 Tri\_offset = 5[ppm]  
 Clipped = FALSE  
 Mod\_return = 1  
 Scans = 8  
 Total\_scans = 8

X\_90\_width = 12.68[us]  
 X\_acq\_time = 1.4548992[s]  
 X\_angle = 45[deg]  
 X\_atn = 3.4[dB]  
 X\_pulse = 6.34[us]  
 Irr\_mode = Off  
 Tri\_mode = Off  
 Dante\_presat = FALSE  
 Initial\_wait = 1[s]  
 Recvr\_gain = 50  
 Relaxation\_delay = 5[s]  
 Repetition\_time = 6.4548992[s]  
 Temp\_get = 21.8[dC]

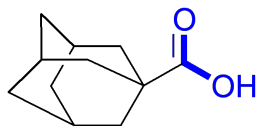

21

abundance

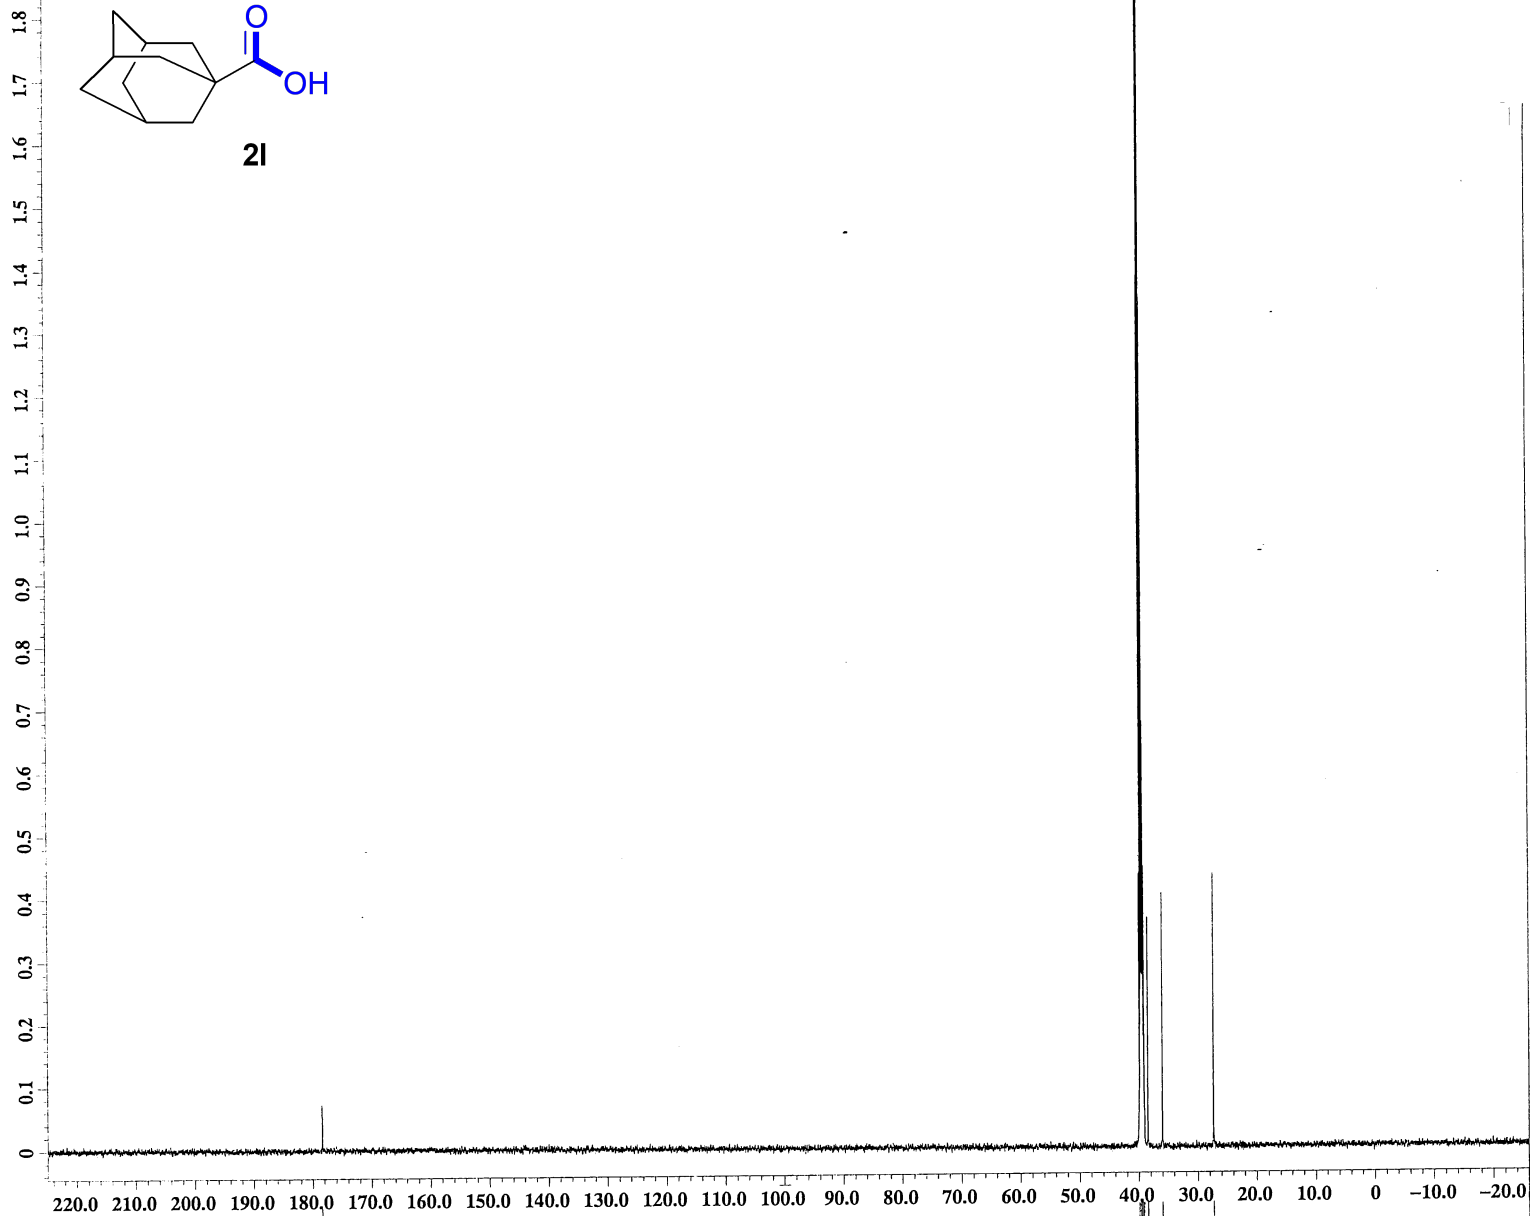

178.4402

39.9317  
39.7977  
39.6540  
39.5200  
39.3764  
39.2423

X : parts per Million : 13C

Filename = Exp-R-122-3aDMSO-Carb  
Author = delta  
Experiment = single\_pulse\_dec  
Sample\_id = Exp-R-122-3aDMSO-Carb  
Solvent = DMSO-D6  
Creation\_time = 31-JUL-2018 19:11:45  
Revision\_time = 31-JUL-2018 19:42:14  
Current\_time = 31-JUL-2018 19:42:29

Content = Exp-R-122-3aDMSO-Carb  
Data\_format = 1D\_COMPLEX  
Dim\_size = 26214  
Dim\_title = 13C  
Dim\_units = [ppm]  
Dimensions = X  
Site = ECA 600  
Spectrometer = DELTA2\_NMR

Field\_strength = 14.09636928 [T] (600 [M])  
X\_acq\_duration = 0.69206016 [s]  
X\_domain = 13C  
X\_freq = 150.91343039 [MHz]  
X\_offset = 100 [ppm]  
X\_points = 32768  
X\_prescans = 4  
X\_resolution = 1.44496109 [Hz]  
X\_sweep = 47.34848485 [kHz]  
Irr\_domain = 1H  
Irr\_freq = 600.1723046 [MHz]  
Irr\_offset = 5 [ppm]  
Clipped = FALSE  
Mod\_return = 1  
Scans = 914  
Total\_scans = 914

X\_90\_width = 12 [us]  
X\_acq\_time = 0.69206016 [s]  
X\_angle = 30 [deg]  
X\_atn = 7.5 [dB]  
X\_pulse = 4 [us]  
Irr\_atn\_dec = 18.95 [dB]  
Irr\_atn\_noe = 18.95 [dB]  
Irr\_noise = WALTZ  
Decoupling = TRUE  
Initial\_wait = 1 [s]  
Noe = TRUE  
Noe\_time = 2.5 [s]  
Recvr\_gain = 60  
Relaxation\_delay = 2.5 [s]  
Repetition\_time = 3.19206016 [s]  
Temp\_get = 22.5 [dC]

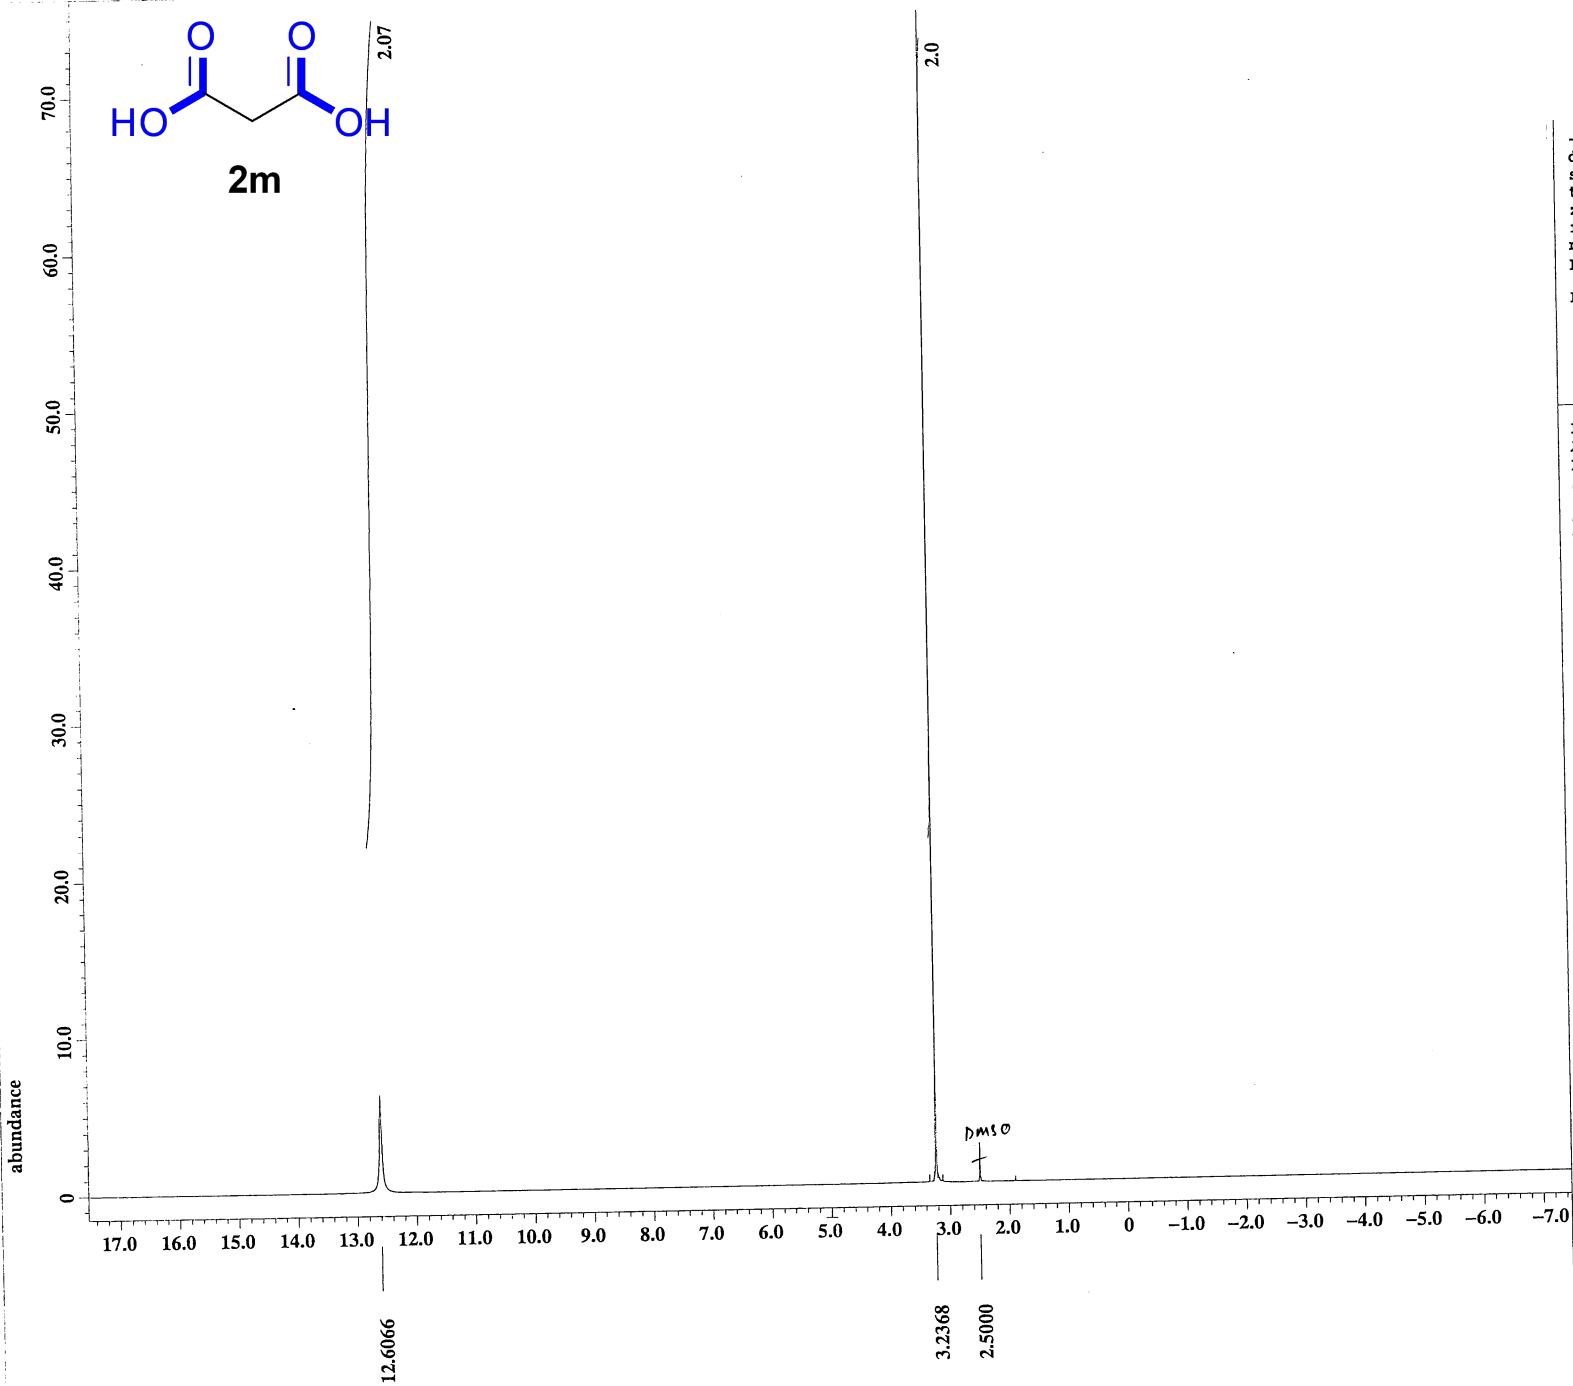

----- PROCESSING PARAMETERS -----  
 dc\_balance : 0 : FALSE  
 sexp : 0.2[Hz] : 0.0[s]  
 trapezoid3 : 0[%] : 80[%] : 100[%]  
 zerofill : 1  
 fft : 1 : TRUE : TRUE  
 machinephase  
 ppm

Derived from: Exp-R-184-5-P-1.jdf

Filename = Exp-R-184-5-P-4.jdf  
 Author = delta  
 Experiment = single\_pulse.ex2  
 Sample\_id = Exp-R-184-5-P  
 Solvent = DMSO-D6  
 Creation\_time = 18-APR-2019 16:43:32  
 Revision\_time = 18-APR-2019 16:49:30  
 Current\_time = 18-APR-2019 16:49:36

Comment = Exp-R-184-5-P  
 Data\_format = 1D COMPLEX  
 Dim\_size = 13107  
 Dim\_title = 1H  
 Dim\_units = [ppm]  
 Dimensions = X  
 Site = ECA 600  
 Spectrometer = DELTA2\_NMR

Field\_strength = 14.09636928[T] (600[M]  
 X\_acq\_duration = 0.87293952[s]  
 X\_domain = 1H  
 X\_freq = 600.1723046[MHz]  
 X\_offset = 5[ppm]  
 X\_points = 16384  
 X\_prescans = 1  
 X\_resolution = 1.14555473[Hz]  
 X\_sweep = 18.76876877[kHz]  
 Irr\_domain = 1H  
 Irr\_freq = 600.1723046[MHz]  
 Irr\_offset = 5[ppm]  
 Tri\_domain = 1H  
 Tri\_freq = 600.1723046[MHz]  
 Tri\_offset = 5[ppm]  
 Clipped = FALSE  
 Mod\_return = 1  
 Scans = 8  
 Total\_scans = 8

X\_90\_width = 13.17[us]  
 X\_acq\_time = 0.87293952[s]  
 X\_angle = 45[deg]  
 X\_atn = 3.4[db]  
 X\_pulse = 6.585[us]  
 Irr\_mode = Off  
 Tri\_mode = Off  
 Dante\_presat = FALSE  
 Initial\_wait = 1[s]  
 Recvr\_gain = 44  
 Relaxation\_delay = 5[s]  
 Repetition\_time = 5.87293952[s]  
 Temp\_get = 21.5[dc]

X : parts per Million : 1H

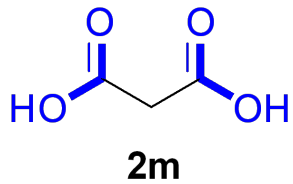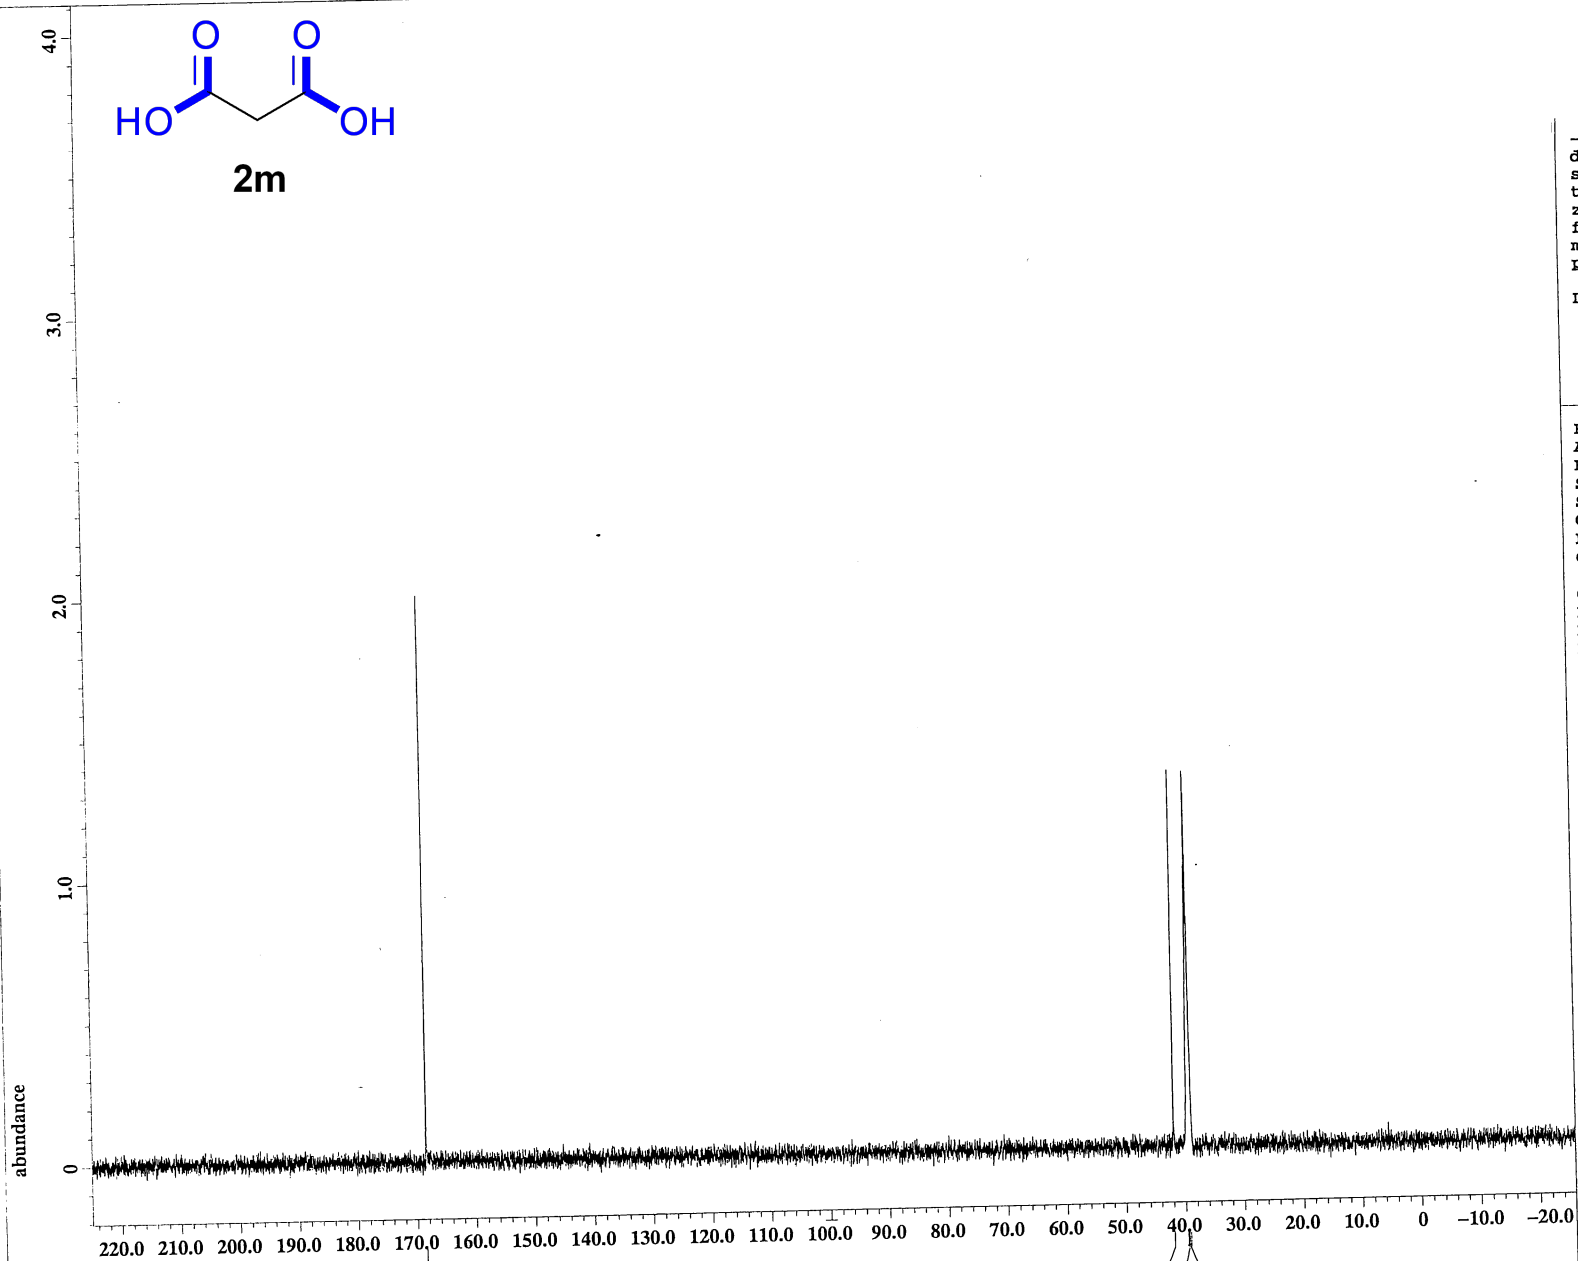

```

---- PROCESSING PARAMETERS ----
dc_balance : 0 : FALSE
sexp : 2.0[Hz] : 0.0[s]
trapezoid3 : 0[%] : 80[%] : 100[%]
zerofill : 1
fft : 1 : TRUE : TRUE
machinephase
ppm
Derived from: Exp-R-184-5-C-1.jdf

```

```

Filename      = Exp-R-184-5-C-3.jdf
Author       = delta
Experiment    = single_pulse_dec
Sample_id     = Exp-R-184-5-C
Solvent      = DMSO-D6
Creation_time = 18-APR-2019 16:45:24
Revision_time = 18-APR-2019 16:50:30
Current_time  = 18-APR-2019 16:50:44

Comment      = Exp-R-184-5-C
Data_format  = 1D COMPLEX
Dim_size     = 26214
Dim_title    = 13C
Dim_units    = [ppm]
Dimensions   = X
Site         = ECA 600
Spectrometer = DELTA2_NMR

Field_strength = 14.09636928[T] (600[M]
X_acq_duration = 0.69206016[s]
X_domain       = 13C
X_freq         = 150.91343039[MHz]
X_offset       = 100 [ppm]
X_points       = 32768
X_prescans     = 4
X_resolution   = 1.44496109 [Hz]
X_sweep        = 47.34848485 [kHz]
Irr_domain     = 1H
Irr_freq       = 600.1723046 [MHz]
Irr_offset     = 5 [ppm]
Clipped        = FALSE
Mod_return     = 1
Scans          = 26
Total_scans    = 26

X_90_width     = 12.7 [us]
X_acq_time     = 0.69206016 [s]
X_angle        = 30 [deg]
X_atn          = 7.5 [dB]
X_pulse        = 4.23333333 [us]
Irr_atn_dec    = 18.62 [dB]
Irr_atn_noe    = 18.62 [dB]
Irr_noise      = WALTZ
Decoupling     = TRUE
Initial_wait   = 1 [s]
Noe            = TRUE
Noe_time       = 2 [s]
Recvr_gain     = 60
Relaxation_delay = 2 [s]
Repetition_time = 2.69206016 [s]
Temp_get       = 21.5 [dC]

```

X : parts per Million : 13C

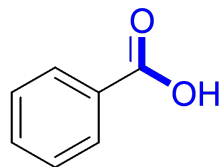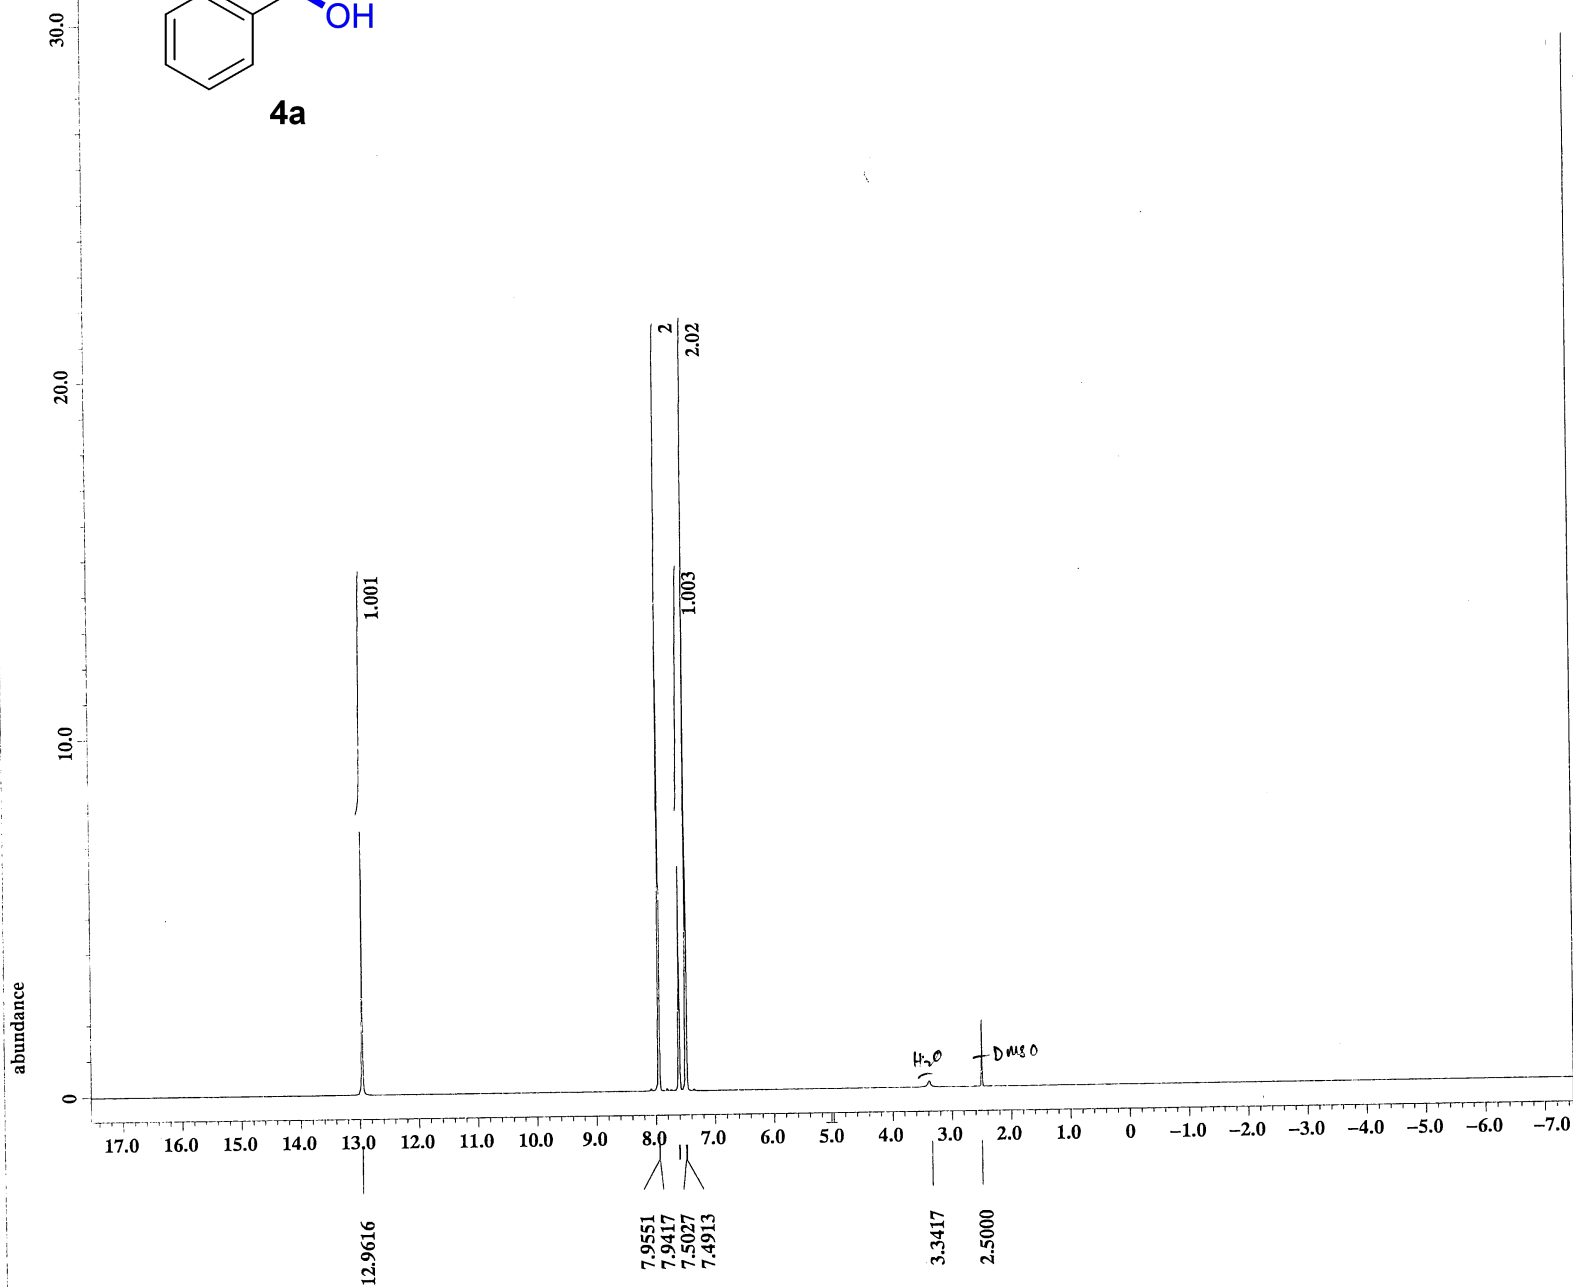

X : parts per Million : 1H

```

Filename      = Exp-R-124-28b-P-5.jdf
Author       = delta
Experiment   = single_pulse.ex2
Sample_id    = Exp-R-124-28b-P
Solvent      = DMSO-D6
Creation_time = 29-AUG-2018 20:27:04
Revision_time = 29-AUG-2018 21:20:46
Current_time  = 29-AUG-2018 21:20:50

Content      = Exp-R-124-28b-P
Data_format  = 1D COMPLEX
Dim_size     = 13107
Dim_title    = 1H
Dim_units    = [ppm]
Dimensions   = X
Site         = ECA 600
Spectrometer = DELTA2_NMR

Field_strength = 14.09636928 [T] (600[M]
X_acq_duration = 0.87293952 [s]
X_domain       = 1H
X_freq         = 600.1723046 [MHz]
X_offset       = 5 [ppm]
X_points       = 16384
X_prescans     = 1
X_resolution   = 1.14555473 [Hz]
X_sweep        = 18.76876877 [kHz]
Irr_domain     = 1H
Irr_freq       = 600.1723046 [MHz]
Irr_offset     = 5 [ppm]
Tri_domain     = 1H
Tri_freq       = 600.1723046 [MHz]
Tri_offset     = 5 [ppm]
Clipped        = FALSE
Mod_return     = 1
Scans          = 8
Total_scans    = 8

X_90_width    = 12.68 [us]
X_acq_time     = 0.87293952 [s]
X_angle        = 45 [deg]
X_atn          = 3.4 [dB]
X_pulse        = 6.34 [us]
Irr_mode       = Off
Tri_mode       = Off
Dante_presat   = FALSE
Initial_wait   = 1 [s]
Recvr_gain     = 44
Relaxation_delay = 5 [s]
Repetition_time = 5.87293952 [s]
Temp_get       = 21.4 [dC]
  
```





4a

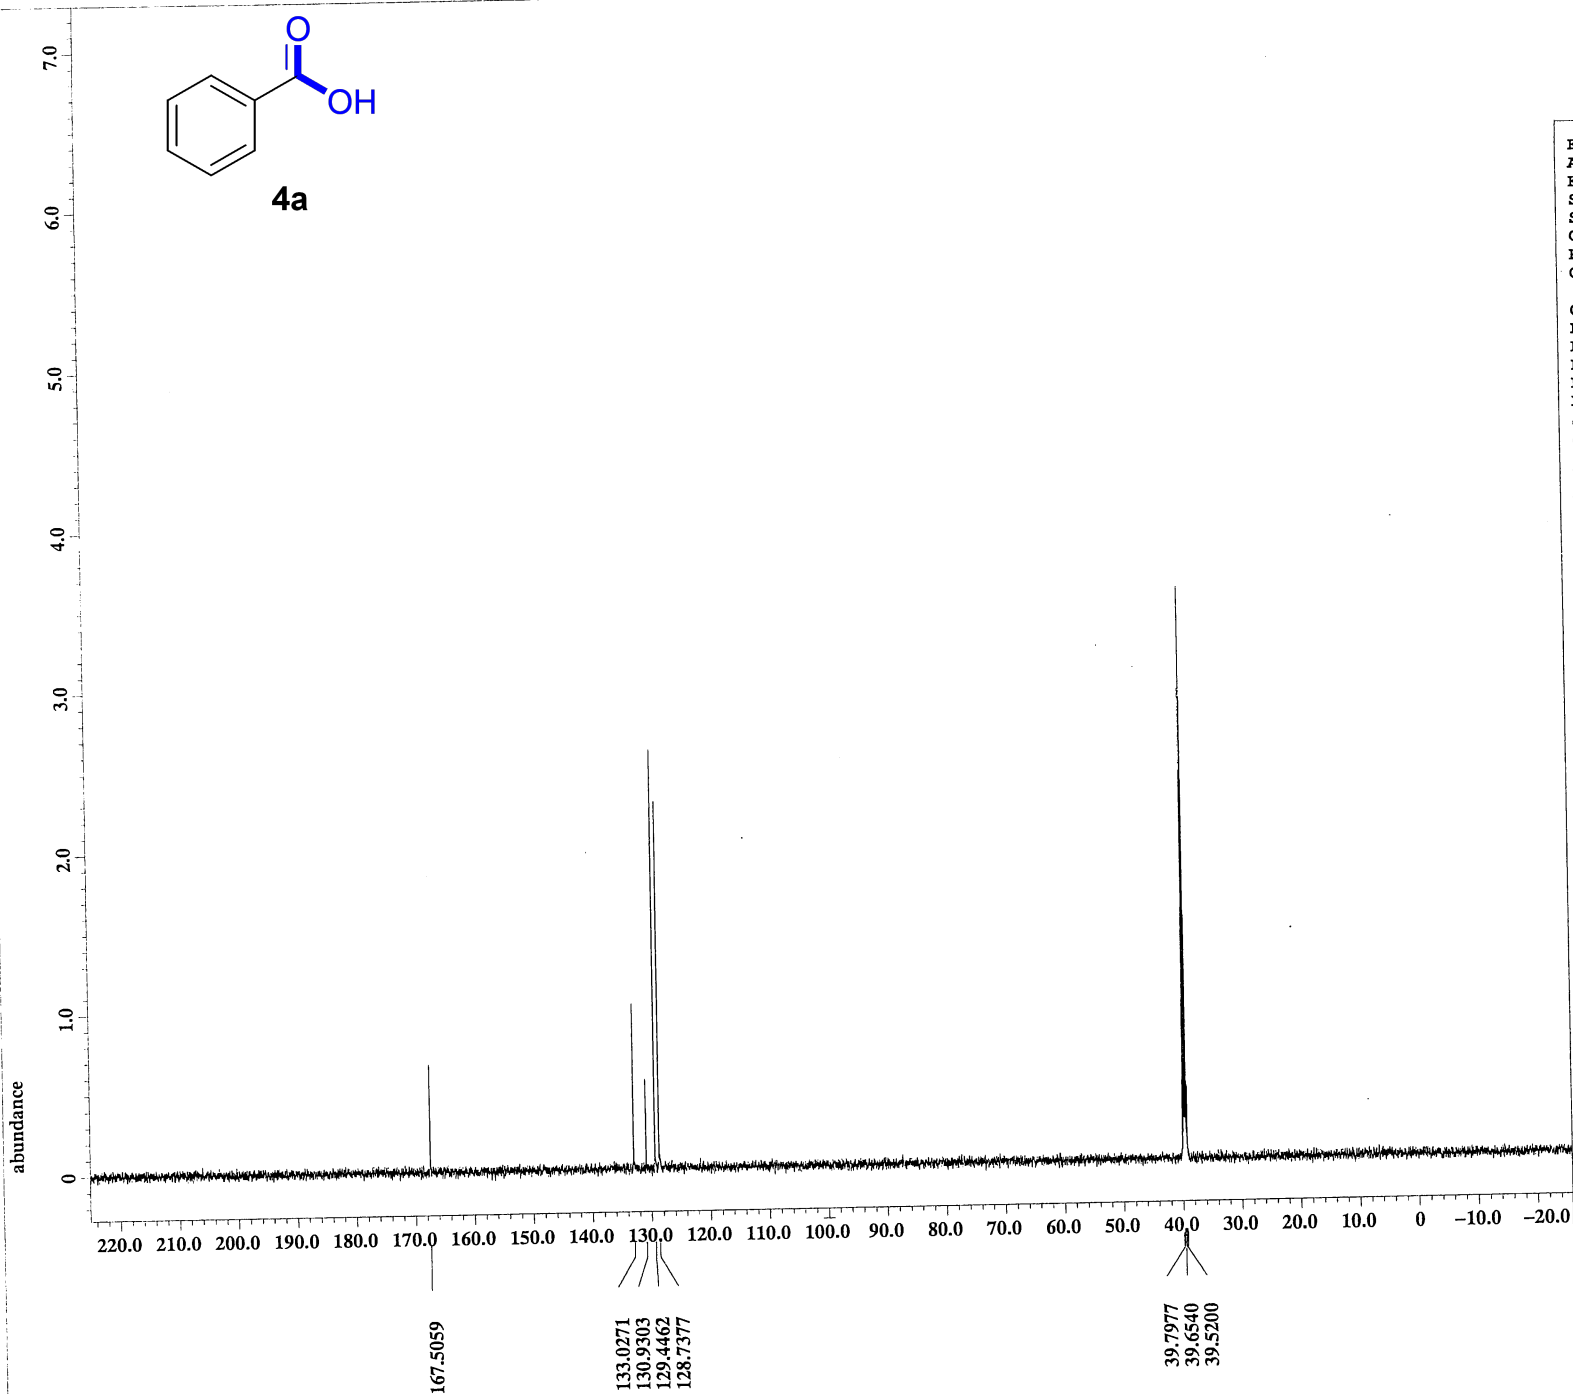

X : parts per Million : 13C

```

Filename      = Exp-R-124-28b-C-3.jdf
Author       = delta
Experiment   = single_pulse_dec
Sample_id    = Exp-R-124-28b-C
Solvent      = DMSO-D6
Creation_time = 29-AUG-2018 21:19:34
Revision_time = 29-AUG-2018 21:21:41
Current_time  = 29-AUG-2018 21:22:01

Content      = Exp-R-124-28b-C
Data_format  = 1D COMPLEX
Dim_size     = 26214
Dim_title    = 13C
Dim_units    = [ppm]
Dimensions   = X
Site         = ECA 600
Spectrometer = DELTA2_NMR

Field_strength = 14.09636928[T] (600[M]
X_acq_duration = 0.69206016[s]
X_domain       = 13C
X_freq        = 150.91343039[MHz]
X_offset      = 100 [ppm]
X_points      = 32768
X_prescans    = 4
X_resolution   = 1.44496109 [Hz]
X_sweep       = 47.34848485 [kHz]
Irr_domain    = 1H
Irr_freq      = 600.1723046 [MHz]
Irr_offset    = 5 [ppm]
Clipped       = FALSE
Mod_return    = 1
Scans         = 27
Total_scans   = 27

X_90_width    = 12 [us]
X_acq_time    = 0.69206016 [s]
X_angle       = 30 [deg]
X_atn         = 7.5 [dB]
X_pulse       = 4 [us]
Irr_atn_dec   = 18.95 [dB]
Irr_atn_noe   = 18.95 [dB]
Irr_noise     = WALTZ
Decoupling    = TRUE
Initial_wait  = 1 [s]
Noe           = TRUE
Noe_time      = 2.5 [s]
Recvr_gain    = 60
Relaxation_delay = 2.5 [s]
Repetition_time = 3.19206016 [s]
Temp_get      = 22.2 [dC]
  
```

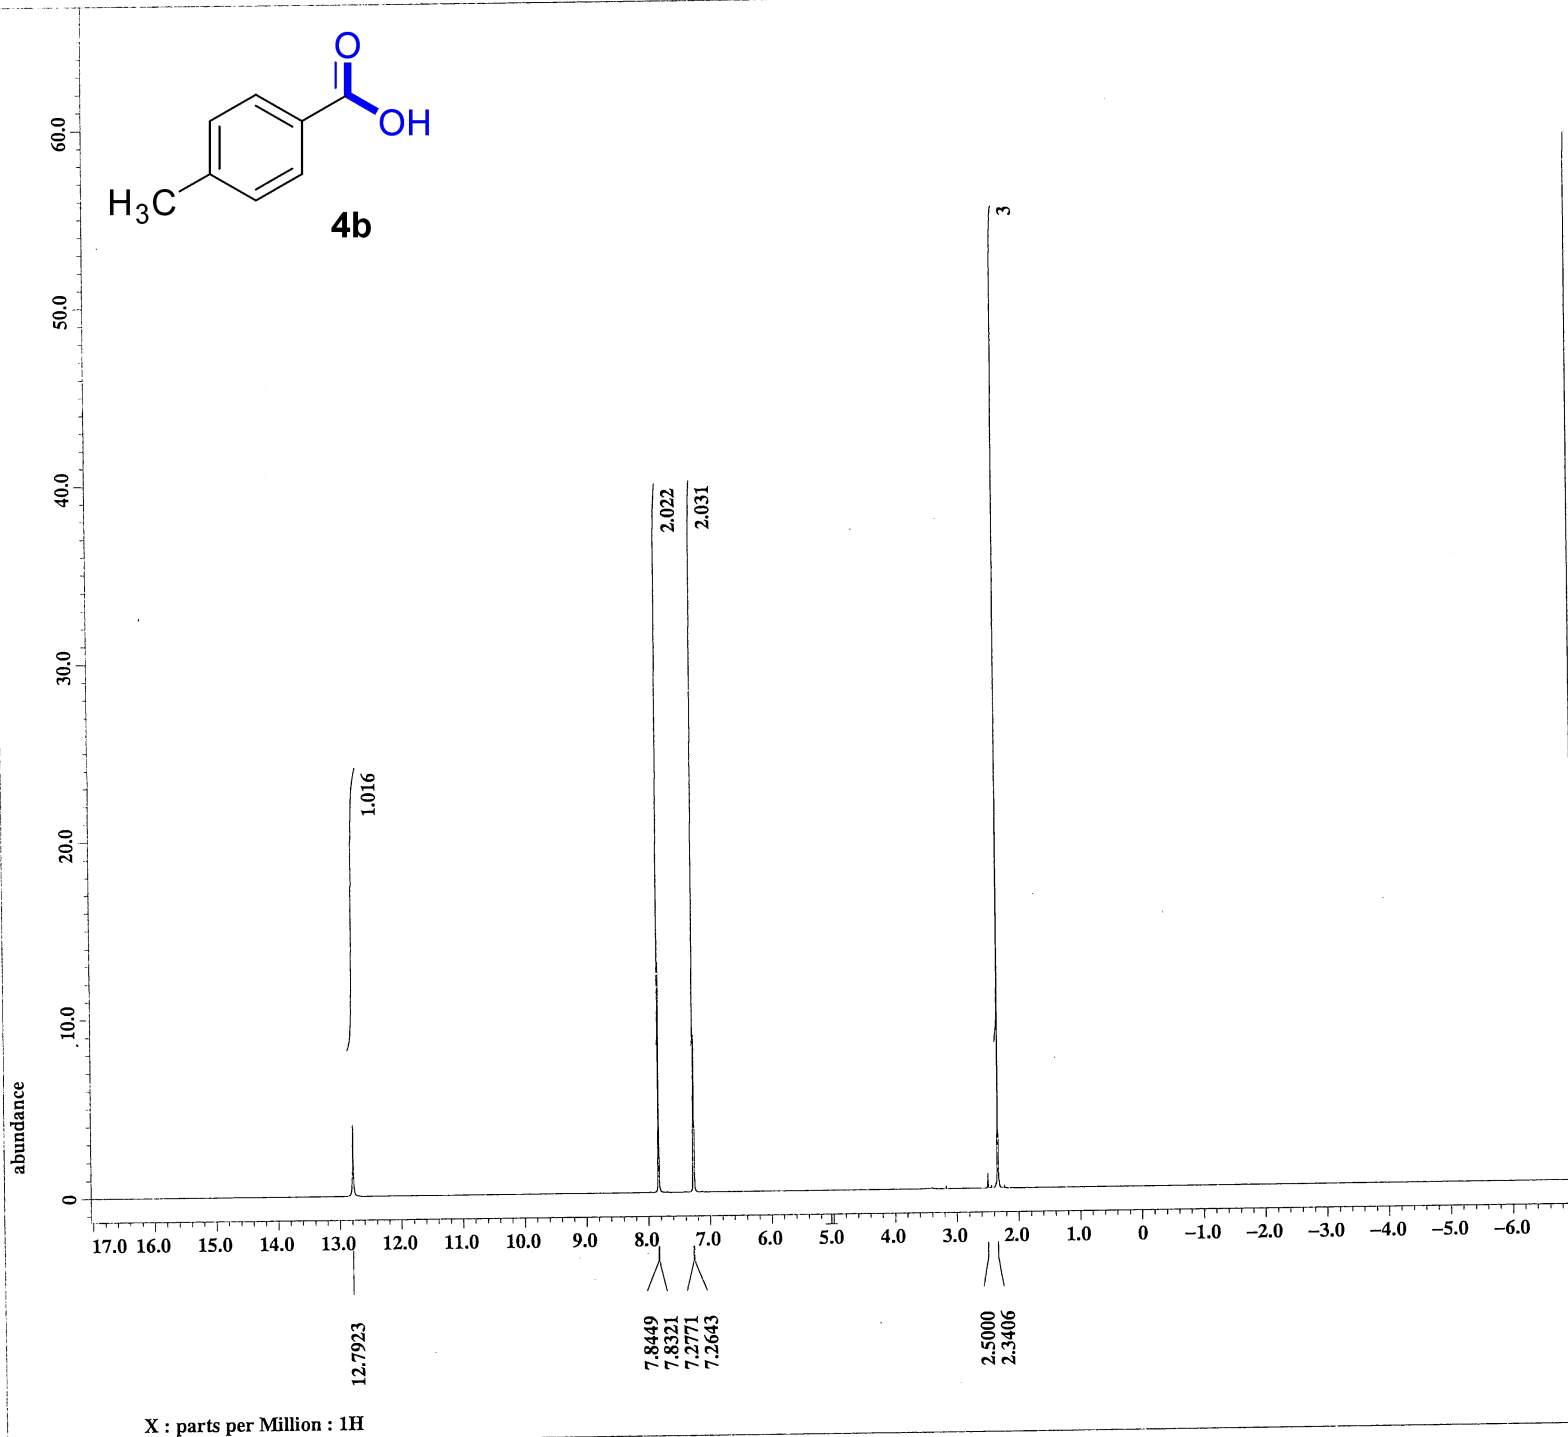

Filename = Exp-R-124-14a-P-6.jdf  
 Author = delta  
 Experiment = single\_pulse.ex2  
 Sample\_id = Exp-R-124-14a-P  
 Solvent = DMSO-D6  
 Creation\_time = 25-SEP-2018 19:22:16  
 Revision\_time = 25-SEP-2018 19:31:43  
 Current\_time = 25-SEP-2018 19:31:45

Content = Exp-R-124-14a-P  
 Data\_format = 1D COMPLEX  
 Dim\_size = 13107  
 Dim\_title = 1H  
 Dim\_units = [ppm]  
 Dimensions = X  
 Site = ECA 600  
 Spectrometer = DELTA2\_NMR

Field\_strength = 14.09636928[T] (600[M]  
 X\_acq\_duration = 0.90963968[s]  
 X\_domain = 1H  
 X\_freq = 600.1723046[MHz]  
 X\_offset = 5[ppm]  
 X\_points = 16384  
 X\_prescans = 1  
 X\_resolution = 1.09933639[Hz]  
 X\_sweep = 18.01152738[kHz]  
 Irr\_domain = 1H  
 Irr\_freq = 600.1723046[MHz]  
 Irr\_offset = 5[ppm]  
 Tri\_domain = 1H  
 Tri\_freq = 600.1723046[MHz]  
 Tri\_offset = 5[ppm]  
 Clipped = FALSE  
 Mod\_return = 1  
 Scans = 8  
 Total\_scans = 8

X\_90\_width = 12.68[us]  
 X\_acq\_time = 0.90963968[s]  
 X\_angle = 45[deg]  
 X\_atn = 3.4[dB]  
 X\_pulse = 6.34[us]  
 Irr\_mode = Off  
 Tri\_mode = Off  
 Dante\_presat = FALSE  
 Initial\_wait = 1[s]  
 Recvr\_gain = 36  
 Relaxation\_delay = 5[s]  
 Repetition\_time = 5.90963968[s]  
 Temp\_get = 21.7[dc]

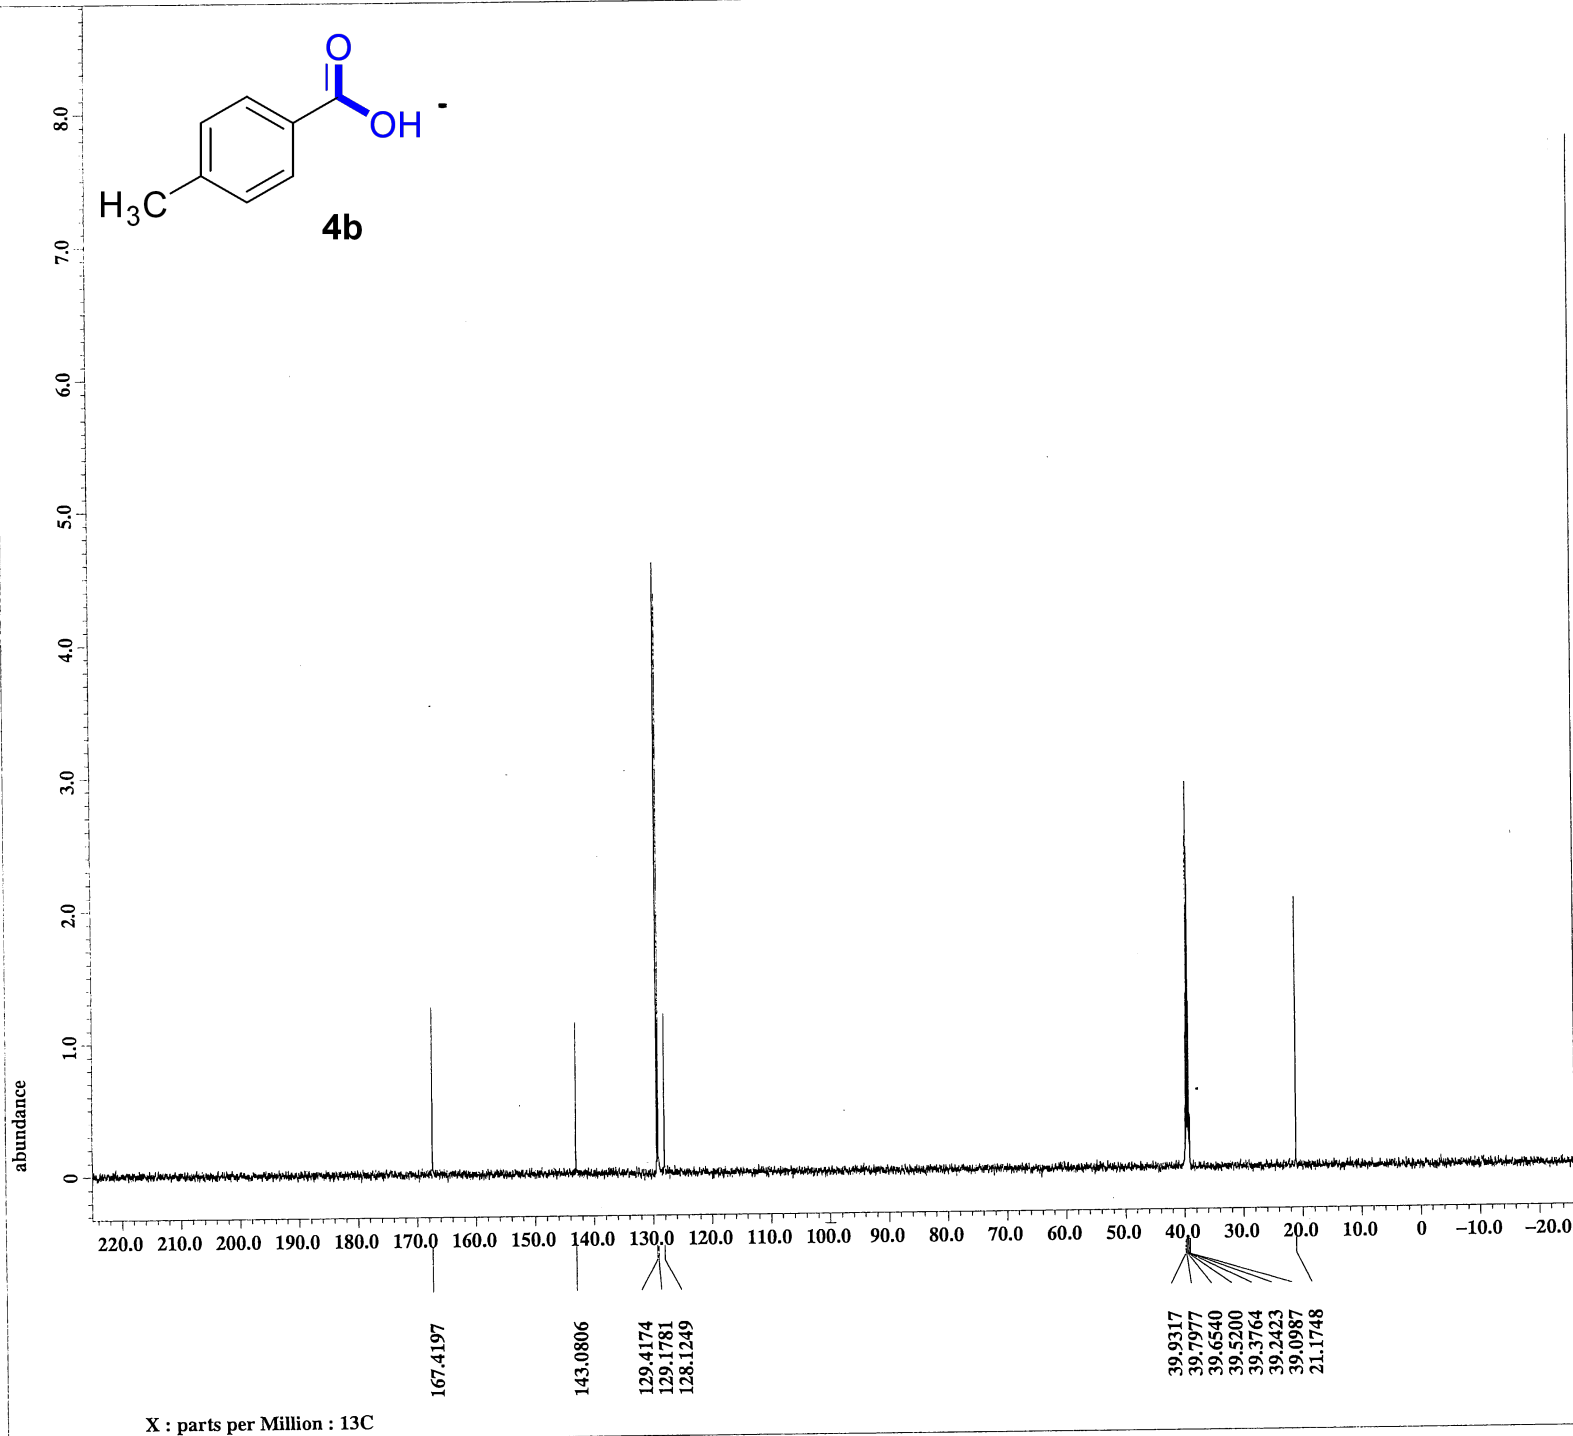

```

Filename      = Exp-R-124-14a-C-3.jdf
Author       = delta
Experiment   = single_pulse_dec
Sample_id    = Exp-R-124-14a-C
Solvent      = DMSO-D6
Creation_time = 25-SEP-2018 19:20:35
Revision_time = 25-SEP-2018 19:27:15
Current_time  = 25-SEP-2018 19:27:57

Content      = Exp-R-124-14a-C
Data_format  = 1D_COMPLEX
Dim_size     = 26214
Dim_title    = 13C
Dim_units    = [ppm]
Dimensions   = X
Site         = ECA 600
Spectrometer = DELTA2_NMR

Field_strength = 14.09636928[T] (600[M]
X_acq_duration = 0.69206016[s]
X_domain       = 13C
X_freq         = 150.91343039[MHz]
X_offset       = 100[ppm]
X_points       = 32768
X_prescans     = 4
X_resolution   = 1.44496109[Hz]
X_sweep        = 47.34848485[kHz]
Irr_domain     = 1H
Irr_freq       = 600.1723046[MHz]
Irr_offset     = 5[ppm]
Clipped        = TRUE
Mod_return     = 1
Scans          = 23
Total_scans    = 23

X_90_width    = 12[us]
X_acq_time    = 0.69206016[s]
X_angle       = 30[deg]
X_atn         = 7.5[dB]
X_pulse       = 4[us]
Irr_atn_dec   = 18.95[dB]
Irr_atn_noe   = 18.95[dB]
Irr_noise     = WALTZ
Decoupling    = TRUE
Initial_wait  = 1[s]
Noe           = TRUE
Noe_time      = 2.5[s]
Recvr_gain    = 60
Relaxation_delay = 2.5[s]
Repetition_time = 3.19206016[s]
Temp_get      = 21.8[dC]

```

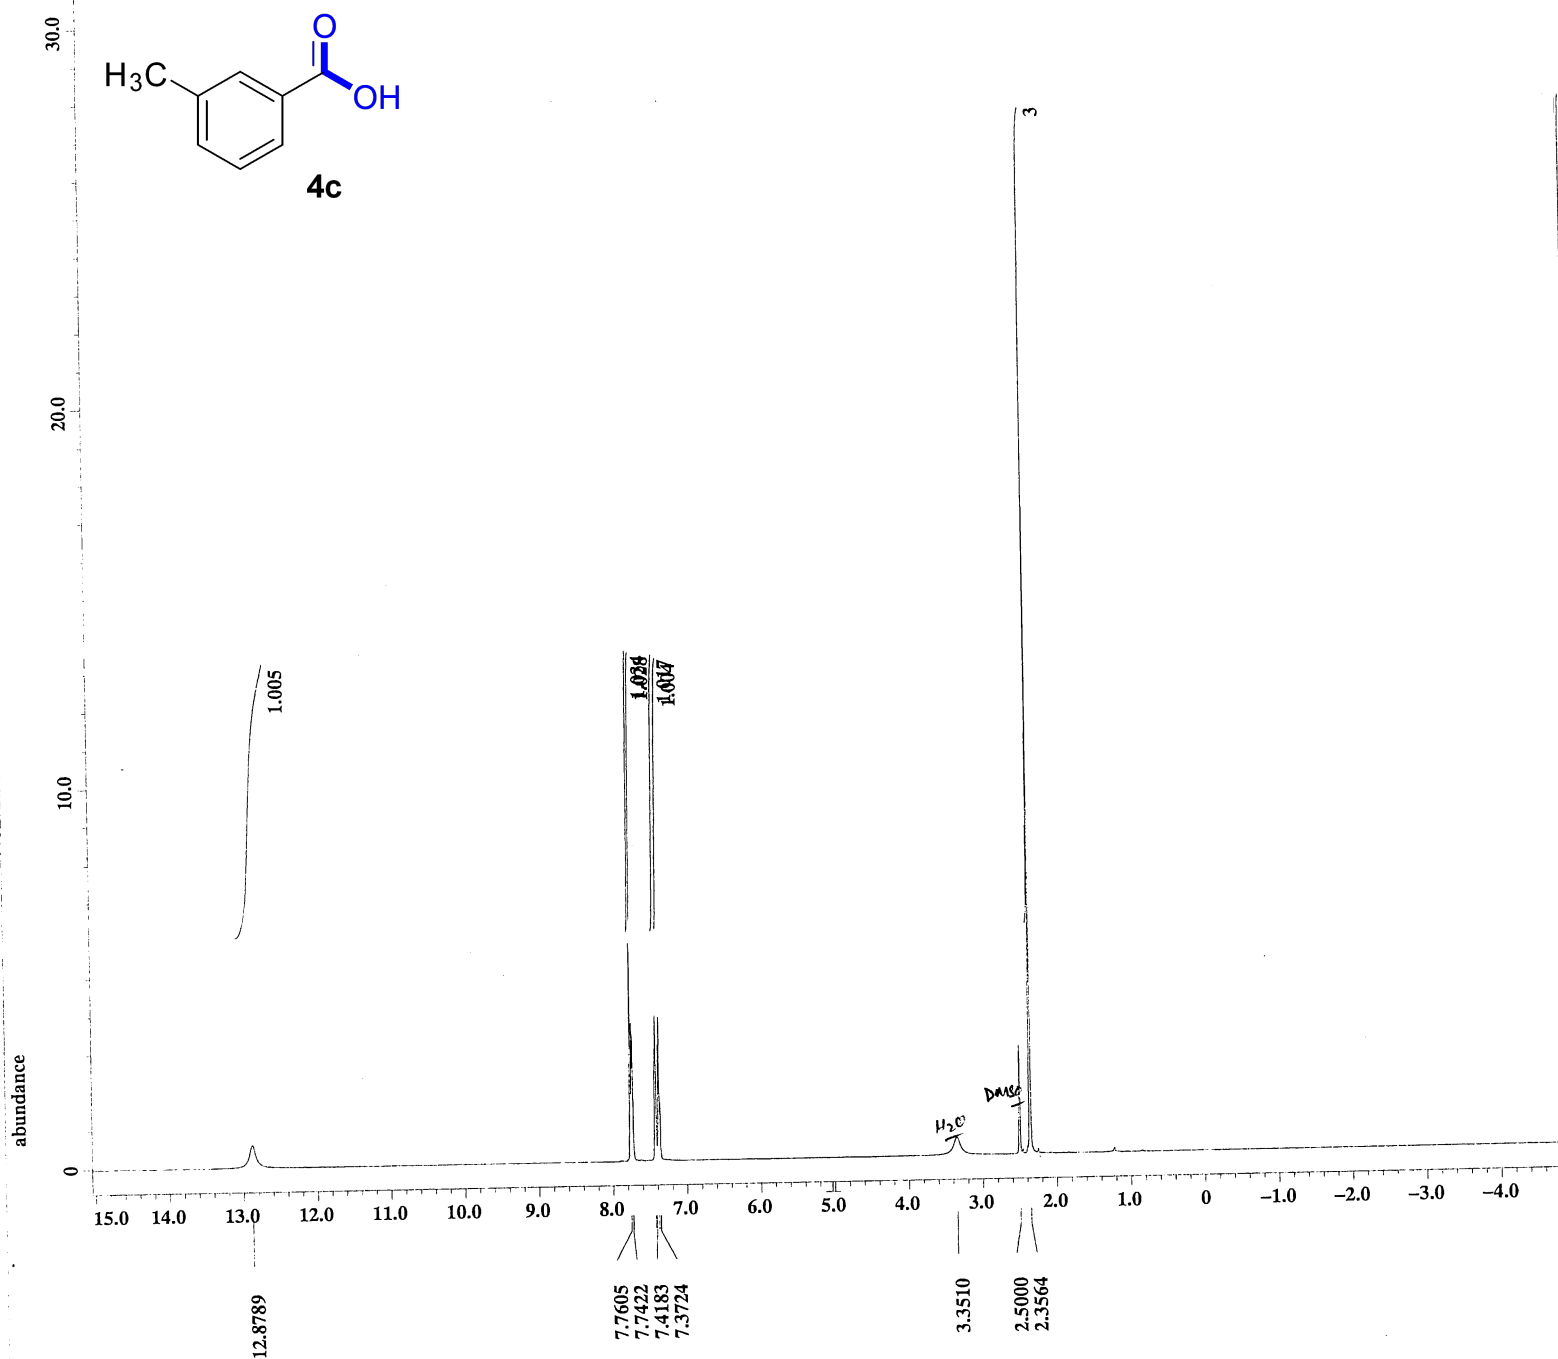

Filename = Exp-R-122-1a-P-6.jdf  
 Author = delta  
 Experiment = single\_pulse.ex2  
 Sample\_id = Exp-R-122-1a-P  
 Solvent = DMSO-D6  
 Creation\_time = 1-AUG-2018 18:28:10  
 Revision\_time = 1-AUG-2018 18:59:58  
 Current\_time = 1-AUG-2018 19:00:03

Content = Exp-R-122-1a-P  
 Data\_format = 1D\_COMPLEX  
 Dim\_size = 13107  
 Dim\_title = 1H  
 Dim\_units = [ppm]  
 Dimensions = X  
 Site = ECA 600  
 Spectrometer = DELTA2\_NMR

Field\_strength = 14.09636928[T] (600[M]  
 X\_acq\_duration = 1.09051904[s]  
 X\_domain = 1H  
 X\_freq = 600.1723046[MHz]  
 X\_offset = 5[ppm]  
 X\_points = 16384  
 X\_prescans = 1  
 X\_resolution = 0.91699454[Hz]  
 X\_sweep = 15.02403846[kHz]  
 Irr\_domain = 1H  
 Irr\_freq = 600.1723046[MHz]  
 Irr\_offset = 5[ppm]  
 Tri\_domain = 1H  
 Tri\_freq = 600.1723046[MHz]  
 Tri\_offset = 5[ppm]  
 Clipped = FALSE  
 Mod\_return = 1  
 Scans = 8  
 Total\_scans = 8

X\_90\_width = 12.68[us]  
 X\_acq\_time = 1.09051904[s]  
 X\_angle = 45[deg]  
 X\_atn = 3.4[dB]  
 X\_pulse = 6.34[us]  
 Irr\_mode = Off  
 Tri\_mode = Off  
 Dante\_preset = FALSE  
 Initial\_wait = 1[s]  
 Recvr\_gain = 50  
 Relaxation\_delay = 5[s]  
 Repetition\_time = 6.09051904[s]  
 Temp\_get = 22[dc]

X : parts per Million : 1H

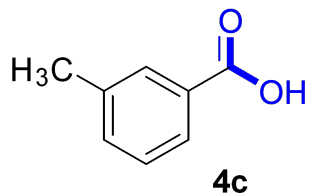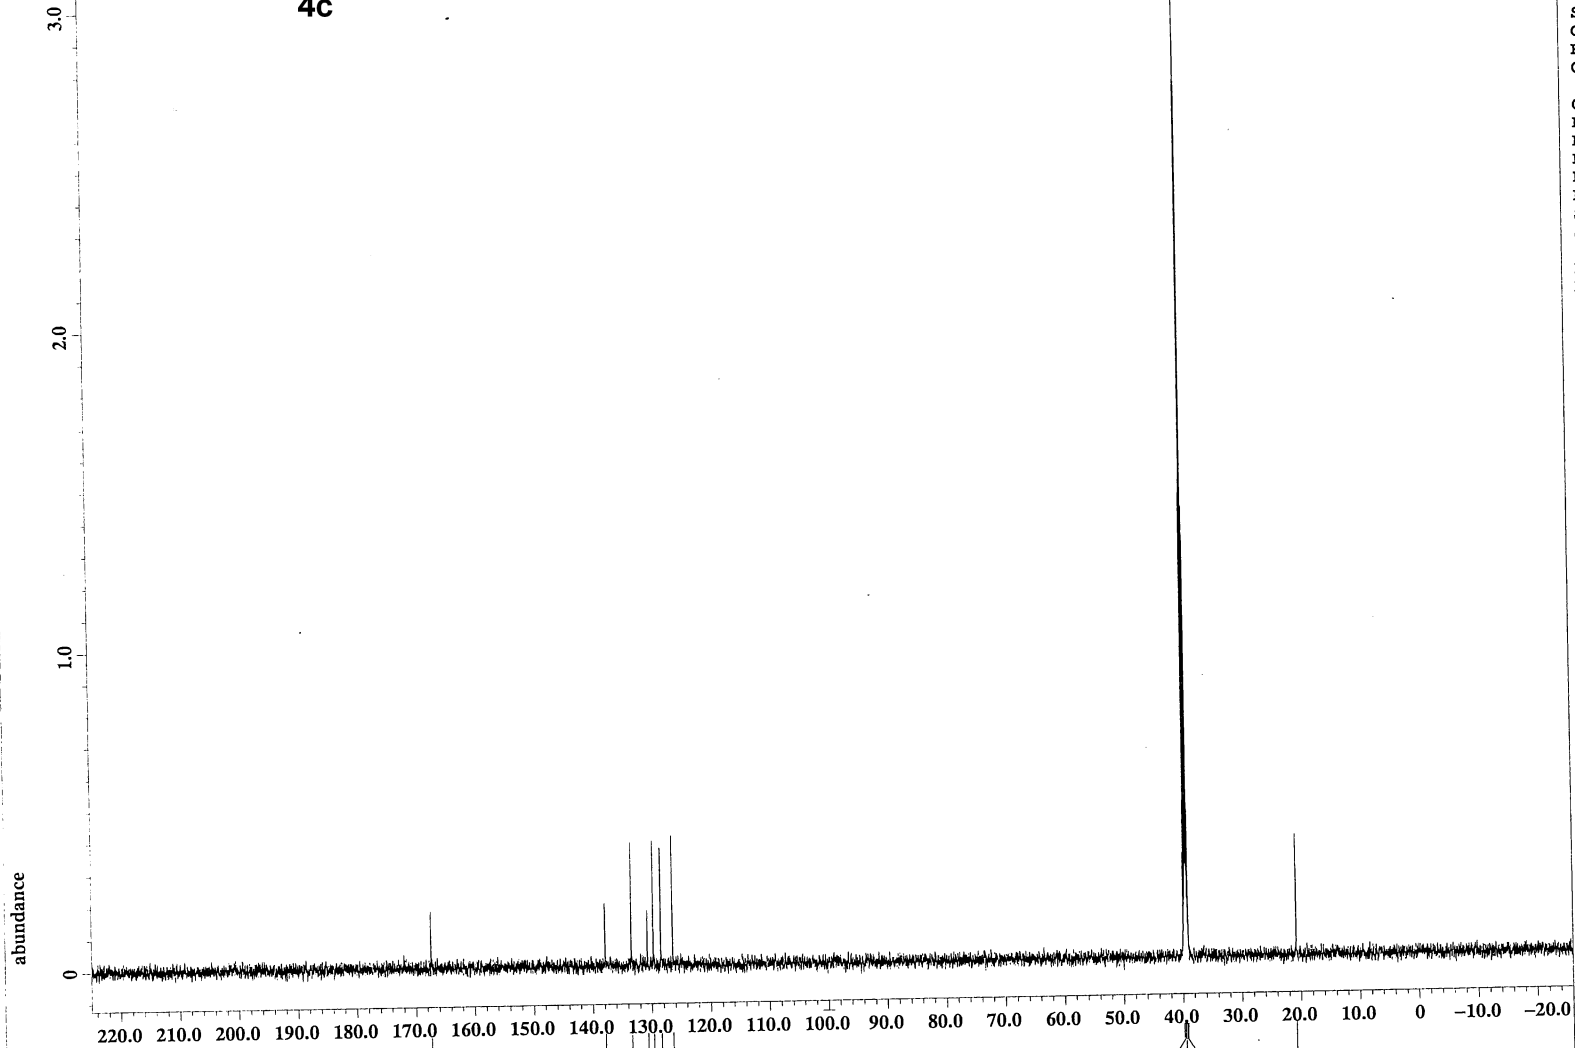

167.4293

137.9007  
133.4676  
130.7483  
129.7430  
128.4695  
126.4684

39.6540  
39.5200  
39.3764

20.8205

X : parts per Million : 13C

```

Filename      = Exp-R-122-1a-C-3.jdf
Author       = delta
Experiment   = single_pulse_dec
Sample_id    = Exp-R-122-1a-C
Solvent      = DMSO-D6
Creation_time = 1-AUG-2018 18:26:24
Revision_time = 1-AUG-2018 19:02:34
Current_time  = 1-AUG-2018 19:03:06
  
```

```

Content      = Exp-R-122-1a-C
Data_format  = 1D COMPLEX
Dim_size     = 26214
Dim_title    = 13C
Dim_units    = [ppm]
Dimensions   = X
Site         = ECA 600
Spectrometer = DELTA2_NMR
  
```

```

Field_strength = 14.09636928[T] (600[M]
X_acq_duration = 0.69206016[s]
X_domain       = 13C
X_freq         = 150.91343039[MHz]
X_offset       = 100[ppm]
X_points       = 32768
X_prescans     = 4
X_resolution   = 1.44496109[Hz]
X_sweep        = 47.34848485[kHz]
Irr_domain     = 1H
Irr_freq       = 600.1723046[MHz]
Irr_offset     = 5[ppm]
Clipped        = FALSE
Mod_return     = 1
Scans          = 52
Total_scans    = 52
  
```

```

X_90_width    = 12[us]
X_acq_time     = 0.69206016[s]
X_angle        = 30[deg]
X_atn          = 7.5[dB]
X_pulse        = 4[us]
Irr_atn_dec    = 18.95[dB]
Irr_atn_noe    = 18.95[dB]
Irr_noise      = WALTZ
Decoupling     = TRUE
Initial_wait   = 1[s]
Noe            = TRUE
Noe_time       = 2.5[s]
Recvr_gain     = 60
Relaxation_delay = 2.5[s]
Repetition_time = 3.19206016[s]
Temp_get       = 22.3[degC]
  
```

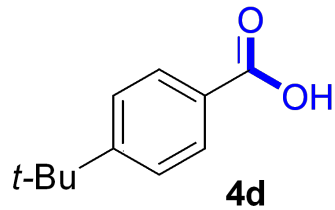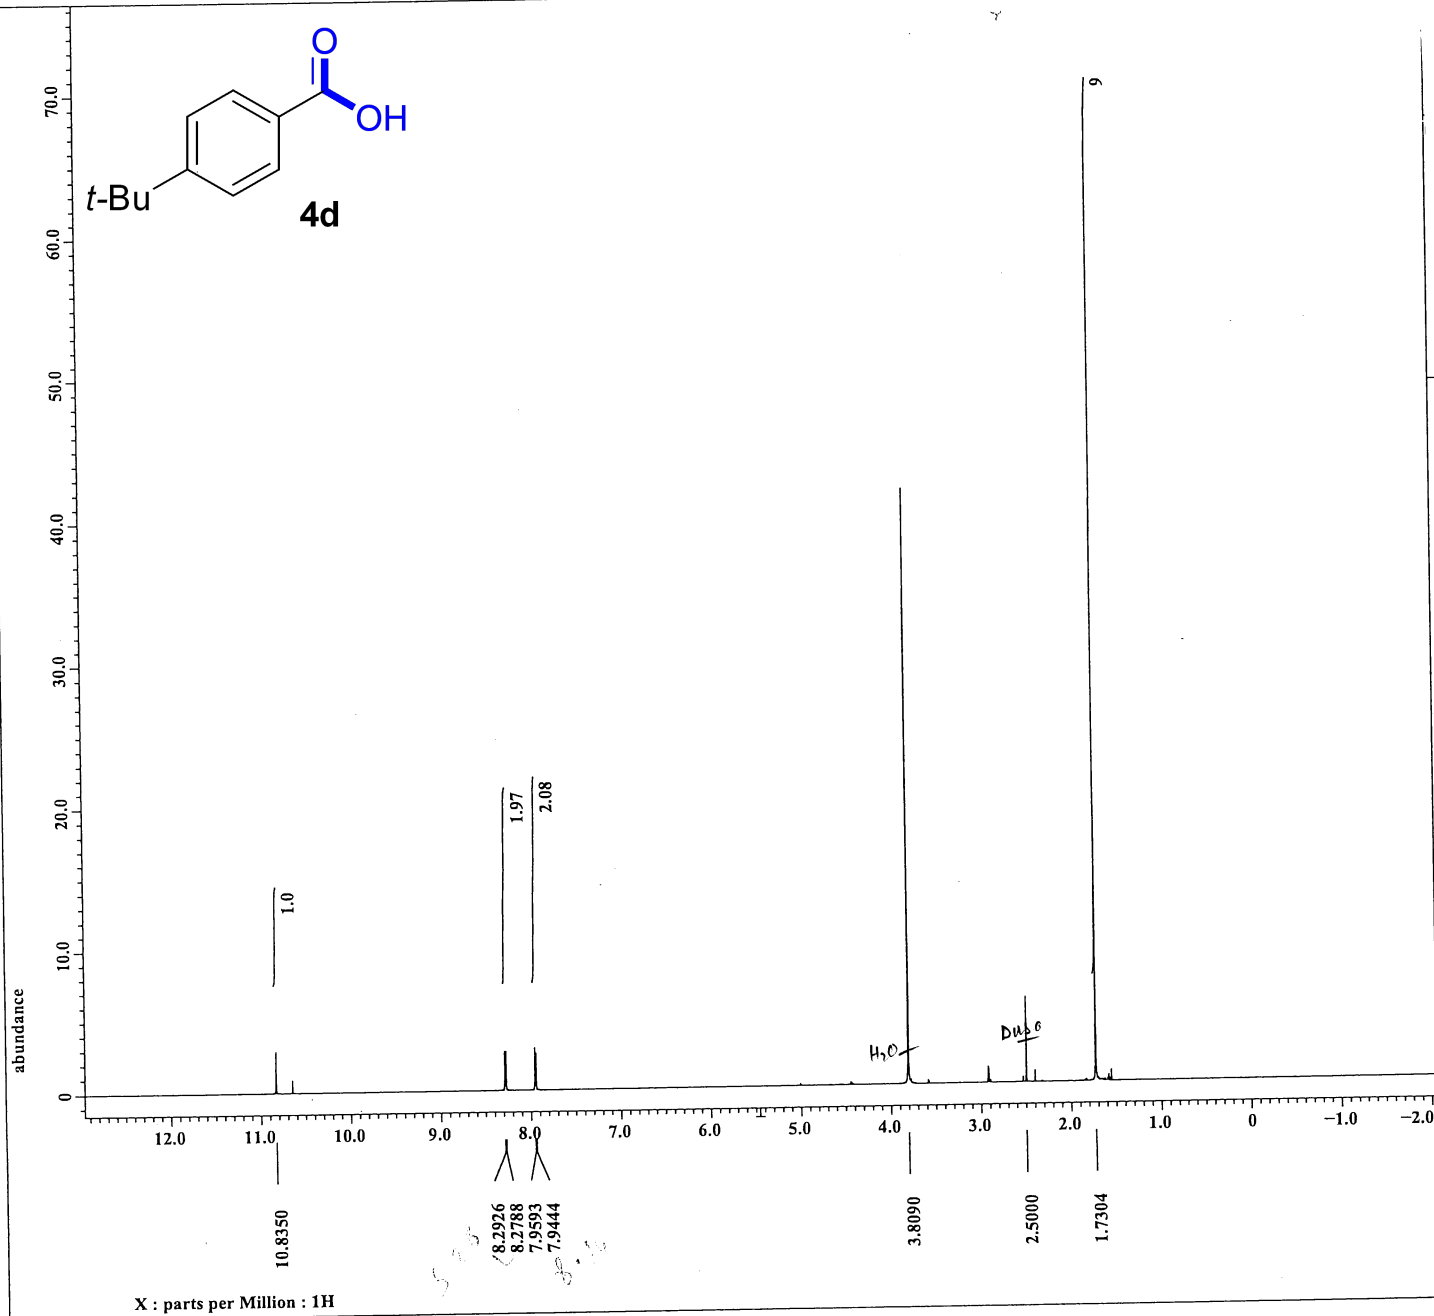

----- PROCESSING PARAMETERS -----

dc\_balance : 0 : FALSE  
 sexp : 0.2[Hz] : 0.0[s]  
 trapezoid3 : 0[%] : 80[%] : 100[%]  
 zerofill : 1  
 fft : 1 : TRUE : TRUE  
 machinephase  
 ppm

Derived from: Exp-R-165-17-1b-P-1.jdf

Filename = Exp-R-165-17-1b-P-4.j  
 Author = delta  
 Experiment = single\_pulse.ex2  
 Sample\_id = Exp-R-165-17-1b-P  
 Solvent = DMSO-D6  
 Creation\_time = 25-DEC-2018 20:12:18  
 Revision\_time = 25-DEC-2018 20:16:48  
 Current\_time = 25-DEC-2018 20:20:08

Comment = Exp-R-165-17-1b-P  
 Data\_format = 1D COMPLEX  
 Dim\_size = 13107  
 Dim\_title = 1H  
 Dim\_units = [ppm]  
 Dimensions = X  
 Site = ECA 600  
 Spectrometer = DELTA2\_NMR

Field\_strength = 14.09636928 [T] (600 [M  
 X\_acq\_duration = 1.4548992 [s]  
 X\_domain = 1H  
 X\_freq = 600.1723046 [MHz]  
 X\_offset = 5 [ppm]  
 X\_points = 16384  
 X\_prescans = 1  
 X\_resolution = 0.68733284 [Hz]  
 X\_sweep = 11.26126126 [kHz]  
 Irr\_domain = 1H  
 Irr\_freq = 600.1723046 [MHz]  
 Irr\_offset = 5 [ppm]  
 Tri\_domain = 1H  
 Tri\_freq = 600.1723046 [MHz]  
 Tri\_offset = 5 [ppm]  
 Clipped = FALSE  
 Mod\_return = 1  
 Scans = 8  
 Total\_scans = 8

X\_90\_width = 13.17 [us]  
 X\_acq\_time = 1.4548992 [s]  
 X\_angle = 45 [deg]  
 X\_atn = 3.4 [dB]  
 X\_atn = 6.585 [us]  
 X\_pulse = Off  
 Irr\_mode = Off  
 Tri\_mode = Off  
 Dante\_presat = FALSE  
 Initial\_wait = 1 [s]  
 Recvr\_gain = 40  
 Relaxation\_delay = 5 [s]  
 Repetition\_time = 6.4548992 [s]  
 Temp\_get = 20 [dC]

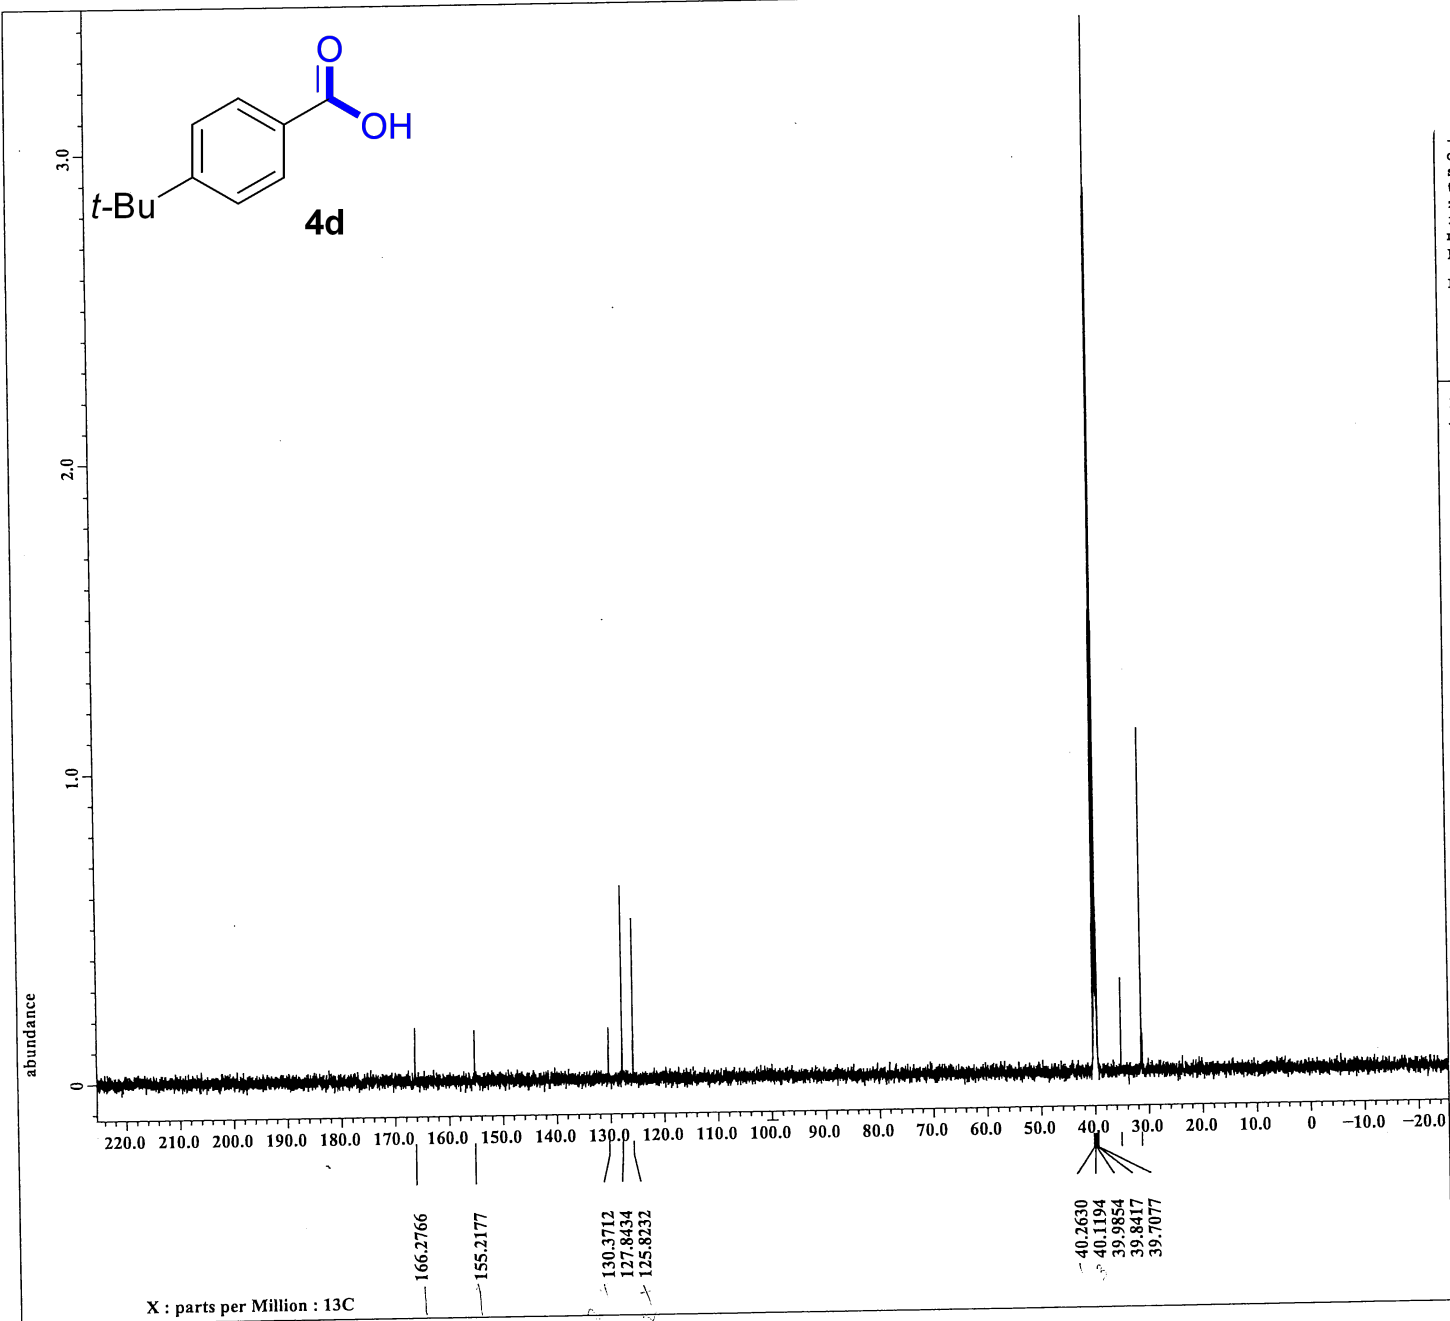

----- PROCESSING PARAMETERS -----  
 dc\_balance : 0 : FALSE  
 sexp : 2.0 [Hz] : 0.0 [s]  
 trapezoid3 : 0 [%] : 80 [%] : 100 [%]  
 zerofill : 1  
 fft : 1 : TRUE : TRUE  
 machinephase  
 ppm  
 Derived from: Exp-R-165-17-1b-C-1.jdf

Filename = Exp-R-165-17-1b-C-2.j  
 Author = delta  
 Experiment = single\_pulse\_dec  
 Sample\_id = Exp-R-165-17-1b-C  
 Solvent = DMSO-D6  
 Creation\_time = 25-DEC-2018 20:15:31  
 Revision\_time = 25-DEC-2018 20:17:26  
 Current\_time = 25-DEC-2018 20:18:52

Comment = Exp-R-165-17-1b-C  
 Data\_format = 1D\_COMPLEX  
 Dim\_size = 26214  
 Dim\_title = 13C  
 Dim\_units = [ppm]  
 Dimensions = X  
 Site = ECA 600  
 Spectrometer = DELTA2\_NMR

Field\_strength = 14.09636928 [T] (600 [M])  
 X\_acq\_duration = 0.69206016 [s]  
 X\_domain = 13C  
 X\_freq = 150.91343039 [MHz]  
 X\_offset = 100 [ppm]  
 X\_points = 32768  
 X\_prescans = 4  
 X\_resolution = 1.44496109 [Hz]  
 X\_sweep = 47.34848485 [kHz]  
 Irr\_domain = 1H  
 Irr\_freq = 600.1723046 [MHz]  
 Irr\_offset = 5 [ppm]  
 Clipped = FALSE  
 Mod\_return = 1  
 Scans = 56  
 Total\_scans = 56

X\_90\_width = 12.7 [us]  
 X\_acq\_time = 0.69206016 [s]  
 X\_angle = 30 [deg]  
 X\_atn = 7.5 [dB]  
 X\_pulse = 4.23333333 [us]  
 Irr\_atn\_dec = 18.62 [dB]  
 Irr\_atn\_noe = 18.62 [dB]  
 Irr\_noise = WALTZ  
 Decoupling = TRUE  
 Initial\_wait = 1 [s]  
 Noe = TRUE  
 Noe\_time = 2 [s]  
 Recvr\_gain = 60  
 Relaxation\_delay = 2 [s]  
 Repetition\_time = 2.69206016 [s]  
 Temp\_get = 20.8 [dC]

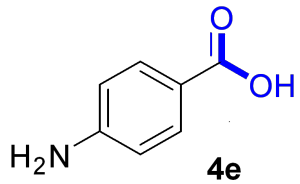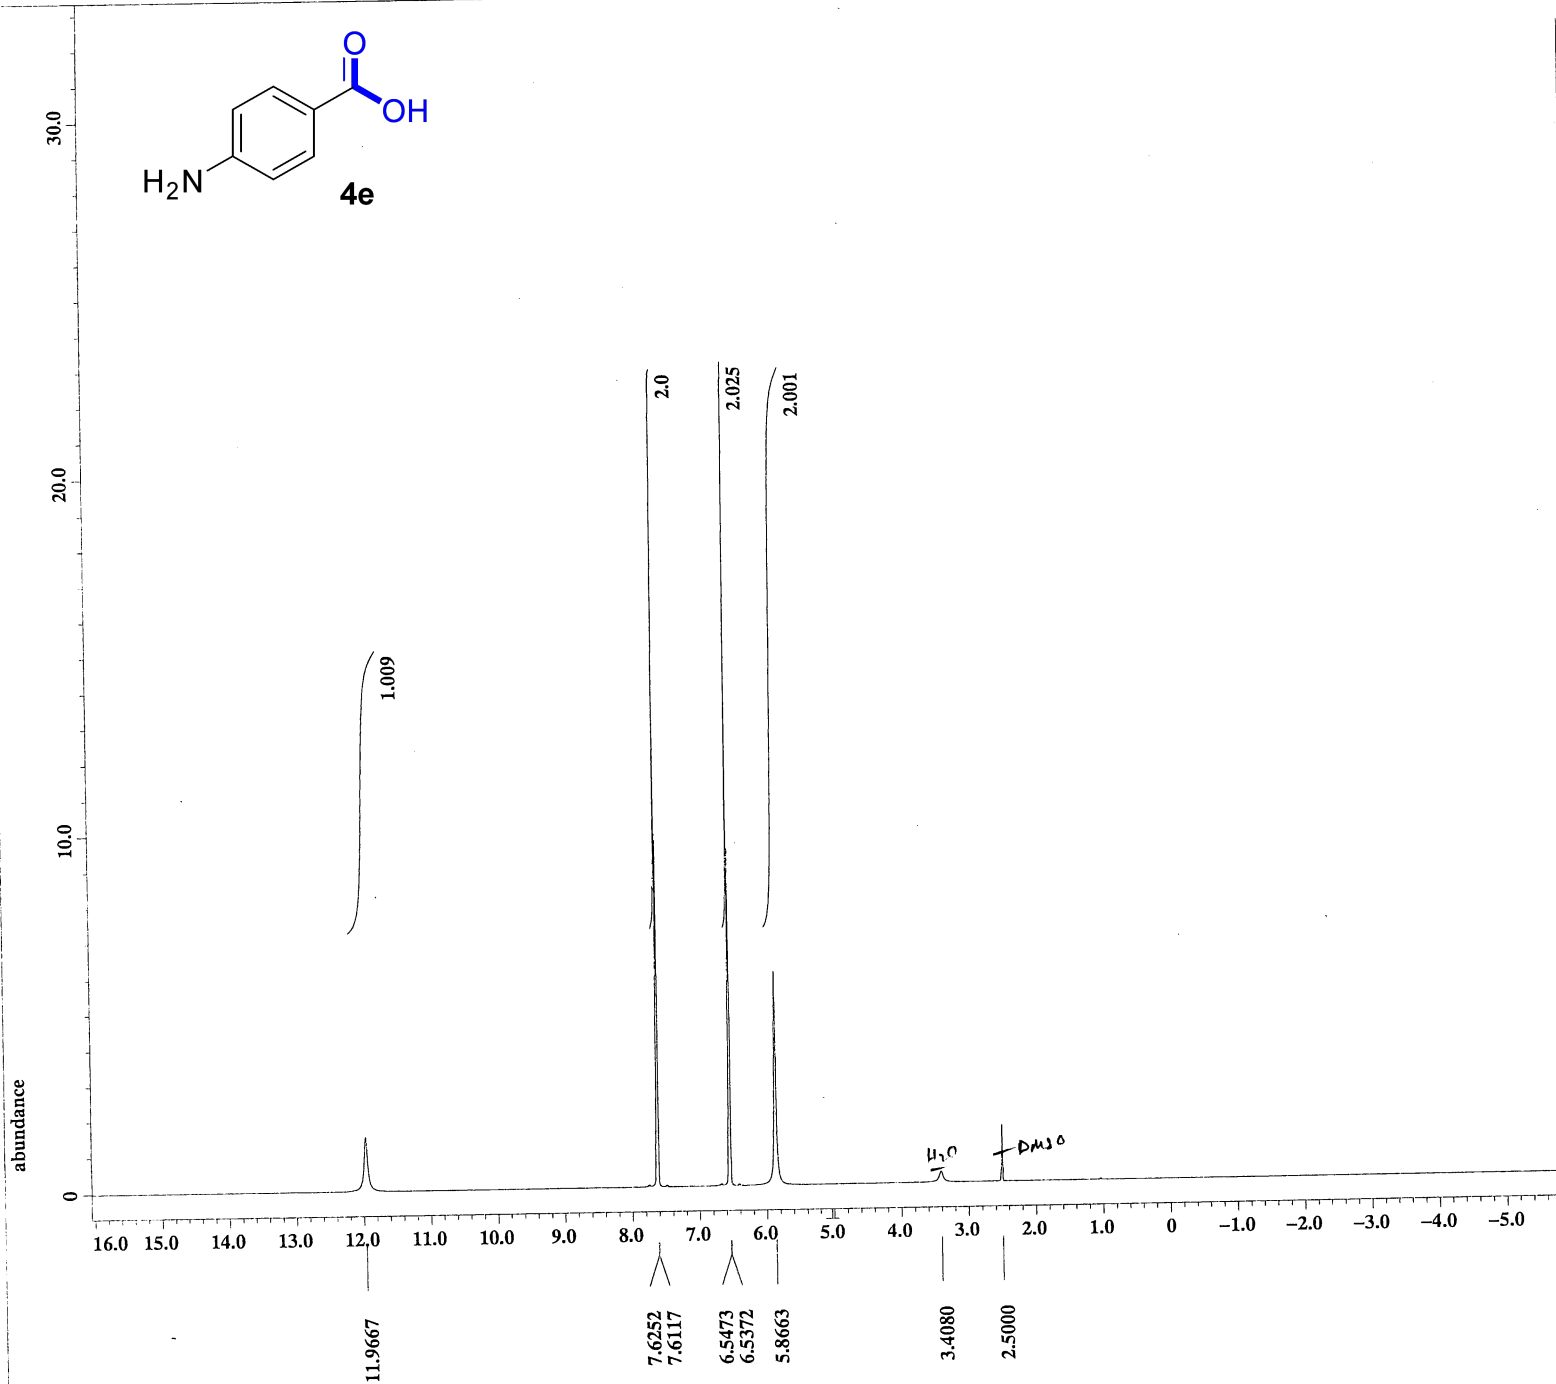

X : parts per Million : 1H

```

Filename      = Exp-R-124-17a-P-4.jdf
Author       = delta
Experiment   = single_pulse.ex2
Sample_id    = Exp-R-124-17a-P
Solvent      = DMSO-D6
Creation_time = 26-SEP-2018 16:31:17
Revision_time = 26-SEP-2018 16:39:57
Current_time  = 26-SEP-2018 16:39:59

Content      = Exp-R-124-17a-P
Data_format  = 1D COMPLEX
Dim_size     = 13107
Dim_title    = 1H
Dim_units    = [ppm]
Dimensions   = X
Site         = ECA 600
Spectrometer = DELTA2_NMR

Field_strength = 14.09636928[T] (600[M]
X_acq_duration = 0.99090432[s]
X_domain       = 1H
X_freq         = 600.1723046[MHz]
X_offset       = 5[ppm]
X_points       = 16384
X_prescans     = 1
X_resolution   = 1.00917917[Hz]
X_sweep        = 16.53439153[kHz]
Irr_domain     = 1H
Irr_freq       = 600.1723046[MHz]
Irr_offset     = 5[ppm]
Tri_domain     = 1H
Tri_freq       = 600.1723046[MHz]
Tri_offset     = 5[ppm]
Clipped        = FALSE
Mod_return     = 1
Scans          = 8
Total_scans    = 8

X_90_width    = 12.68[us]
X_acq_time    = 0.99090432[s]
X_angle       = 45[deg]
X_atn         = 3.4[db]
X_pulse       = 6.34[us]
Irr_mode      = Off
Tri_mode      = Off
Dante_presat  = FALSE
Initial_wait  = 1[s]
Recvr_gain    = 44
Relaxation_delay = 5[s]
Repetition_time = 5.99090432[s]
Temp_get      = 21.1[dc]
  
```



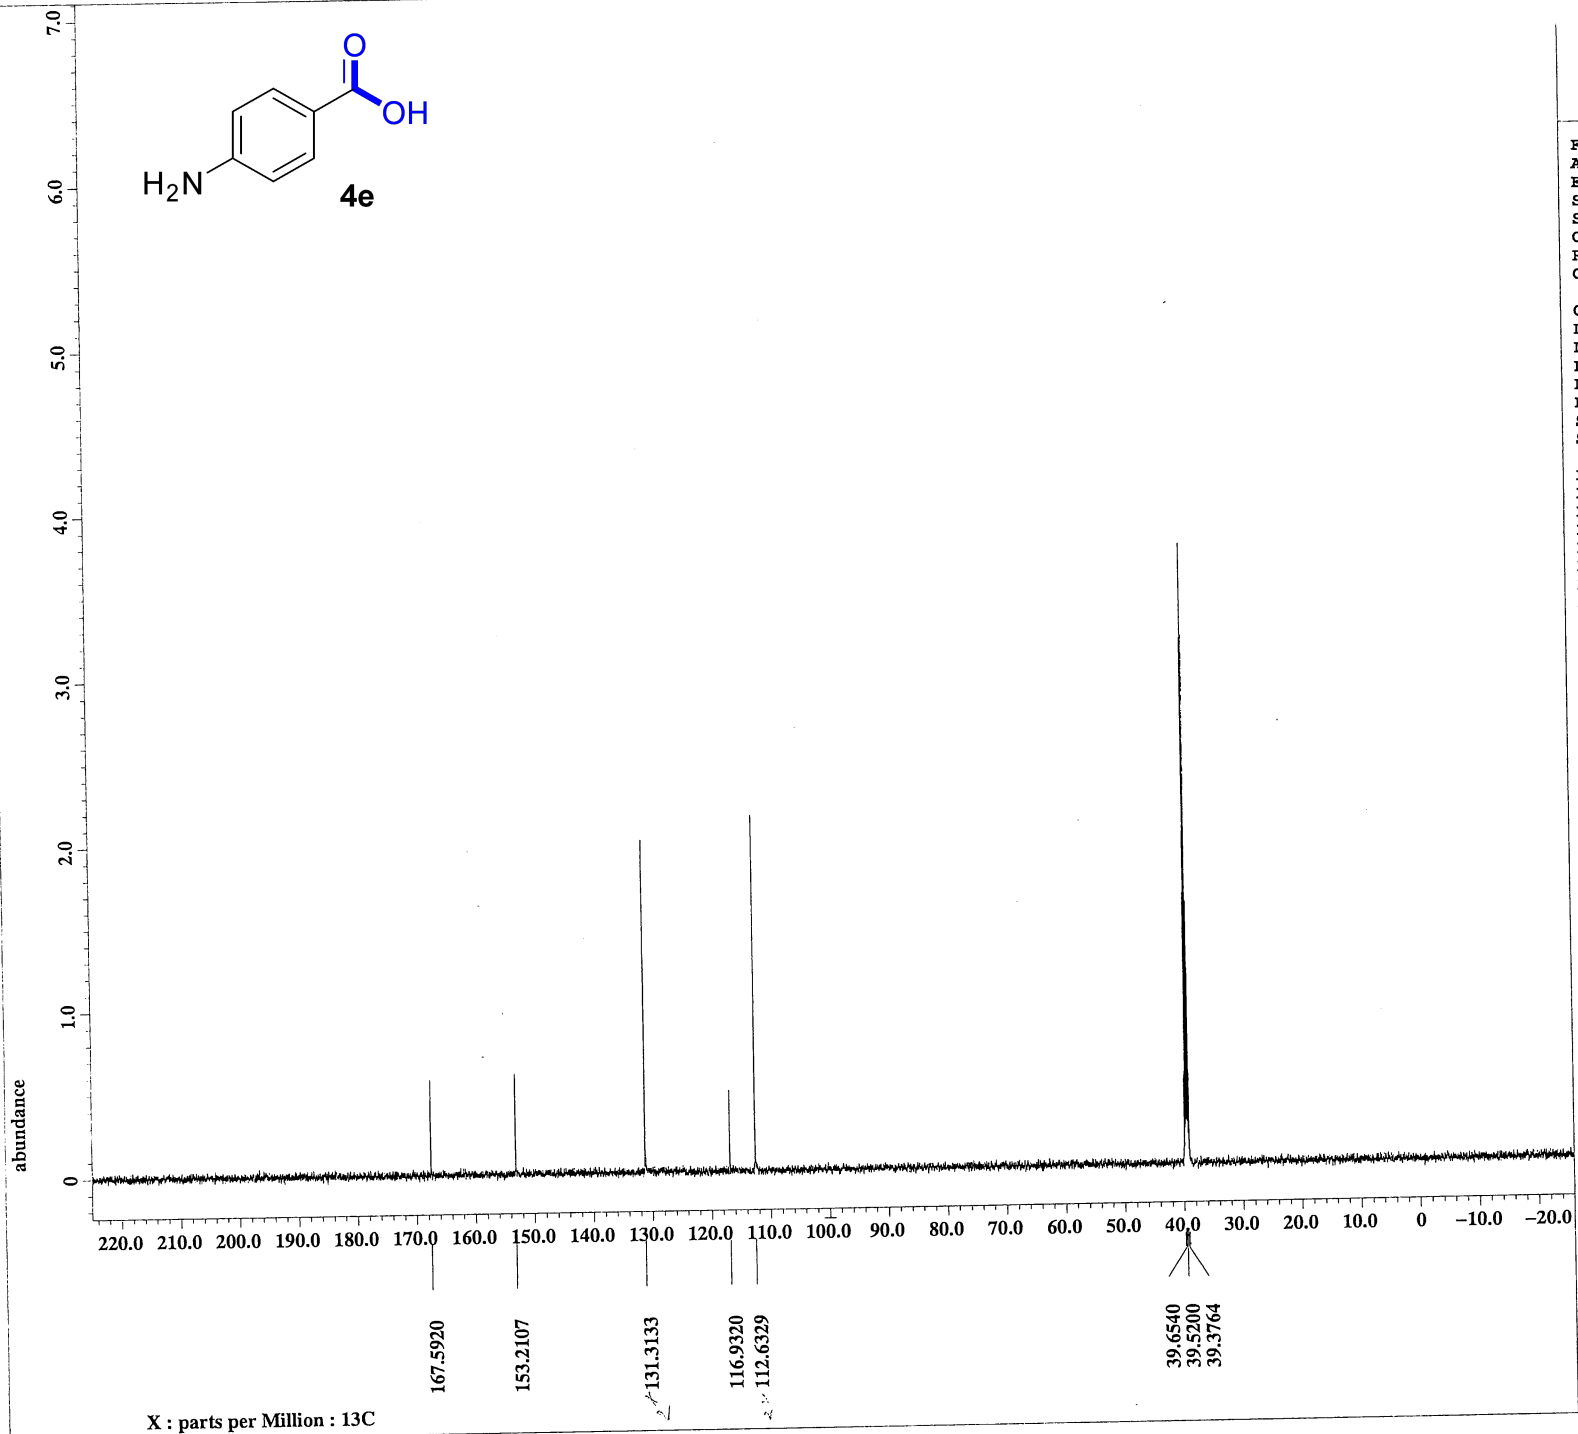

```

Filename      = Exp-R-124-17a-C-3.jdf
Author       = delta
Experiment   = single_pulse_dec
Sample_id    = Exp-R-124-17a-C
Solvent      = DMSO-D6
Creation_time = 26-SEP-2018 16:34:14
Revision_time = 26-SEP-2018 16:40:51
Current_time  = 26-SEP-2018 16:41:08

Content      = Exp-R-124-17a-C
Data_format  = 1D COMPLEX
Dim_size     = 26214
Dim_title    = 13C
Dim_units    = [ppm]
Dimensions   = X
Site         = ECA 600
Spectrometer = DELTA2_NMR

Field_strength = 14.09636928[T] (600[M]
X_acq_duration = 0.69206016[s]
X_domain       = 13C
X_freq         = 150.91343039[MHz]
X_offset       = 100[ppm]
X_points       = 32768
X_prescans     = 4
X_resolution   = 1.44496109[Hz]
X_sweep        = 47.34848485[kHz]
Irr_domain     = 1H
Irr_freq       = 600.1723046[MHz]
Irr_offset     = 5[ppm]
Clipped        = FALSE
Mod_return     = 1
Scans          = 40
Total_scans    = 40

X_90_width    = 12[us]
X_acq_time    = 0.69206016[s]
X_angle       = 30[deg]
X_atn         = 7.5[dB]
X_pulse       = 4[us]
Irr_atn_dec   = 18.95[dB]
Irr_atn_noe   = 18.95[dB]
Irr_noise     = WALTZ
Decoupling    = TRUE
Initial_wait  = 1[s]
Noe           = TRUE
Noe_time      = 2.5[s]
Recvr_gain    = 60
Relaxation_delay = 2.5[s]
Repetition_time = 3.19206016[s]
Temp_get      = 21.4[dC]

```

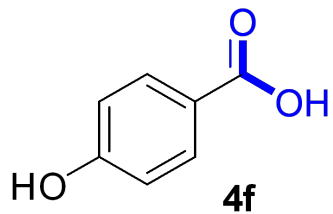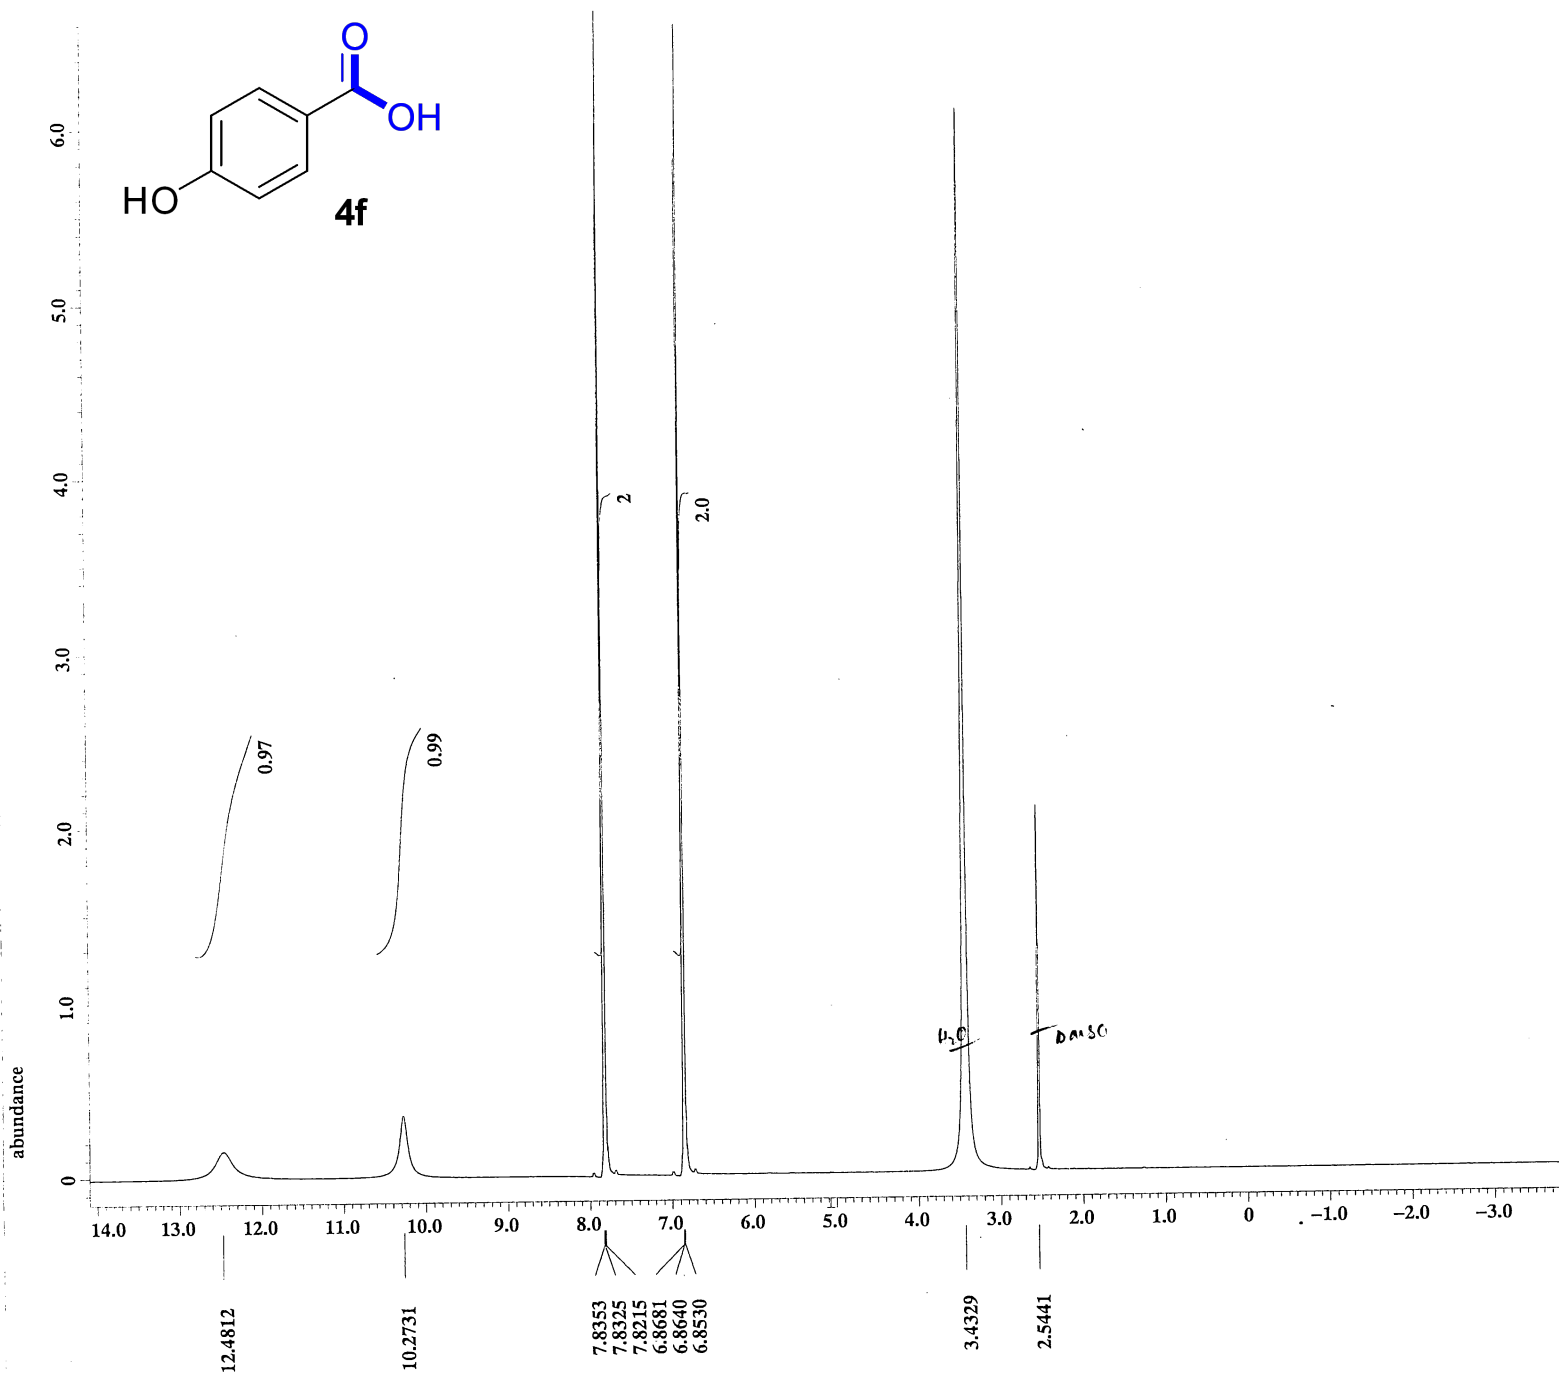

X : parts per Million : 1H

----- PROCESSING PARAMETERS -----  
 dc\_balance : 0 : FALSE  
 secp : 0.2[Hz] : 0.0[s]  
 trapezoid3 : 0[%] : 80[%] : 100[%]  
 zerofill : 1  
 fft : 1 : TRUE : TRUE  
 machinephase  
 ppm

Derived from: Exp-AB-R-184-6-H-5.jdf

Filename = Exp-AB-R-184-6-H-10.j  
 Author = delta  
 Experiment = single\_pulse.ex2  
 Sample\_id = Exp-AB-R-184-6-H  
 Solvent = DMSO-D6  
 Creation\_time = 31-AUG-2020 11:25:51  
 Revision\_time = 31-AUG-2020 11:35:00  
 Current\_time = 31-AUG-2020 11:35:04

Comment = Exp-AB-R-184-6-H  
 Data\_format = 1D\_COMPLEX  
 Dim\_size = 13107  
 Dim\_title = 1H  
 Dim\_units = [ppm]  
 Dimensions = X  
 Site = ECA 600  
 Spectrometer = DELTA2\_NMR

Field\_strength = 14.09636928[T] (600[M]  
 X\_acq\_duration = 1.21110528[s]  
 X\_domain = 1H  
 X\_freq = 600.1723046[MHz]  
 X\_offset = 5[ppm]  
 X\_points = 16384  
 X\_prescans = 1  
 X\_resolution = 0.82569205[Hz]  
 X\_sweep = 13.52813853[kHz]  
 Irr\_domain = 1H  
 Irr\_freq = 600.1723046[MHz]  
 Irr\_offset = 5[ppm]  
 Tri\_domain = 1H  
 Tri\_freq = 600.1723046[MHz]  
 Tri\_offset = 5[ppm]  
 Clipped = FALSE  
 Mod\_return = 1  
 Scans = 8  
 Total\_scans = 8

X\_90\_width = 13.17[us]  
 X\_acq\_time = 1.21110528[s]  
 X\_angle = 45[deg]  
 X\_atn = 3.4[dB]  
 X\_pulse = 6.585[us]  
 Irr\_mode = Off  
 Tri\_mode = Off  
 Dante\_presat = FALSE  
 Initial\_wait = 1[s]  
 Recvr\_gain = 48  
 Relaxation\_delay = 5[s]  
 Repetition\_time = 6.21110528[s]  
 Temp\_get = 21.4[dc]

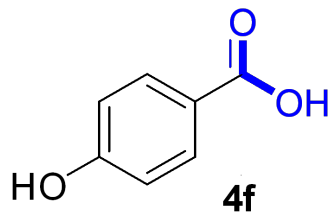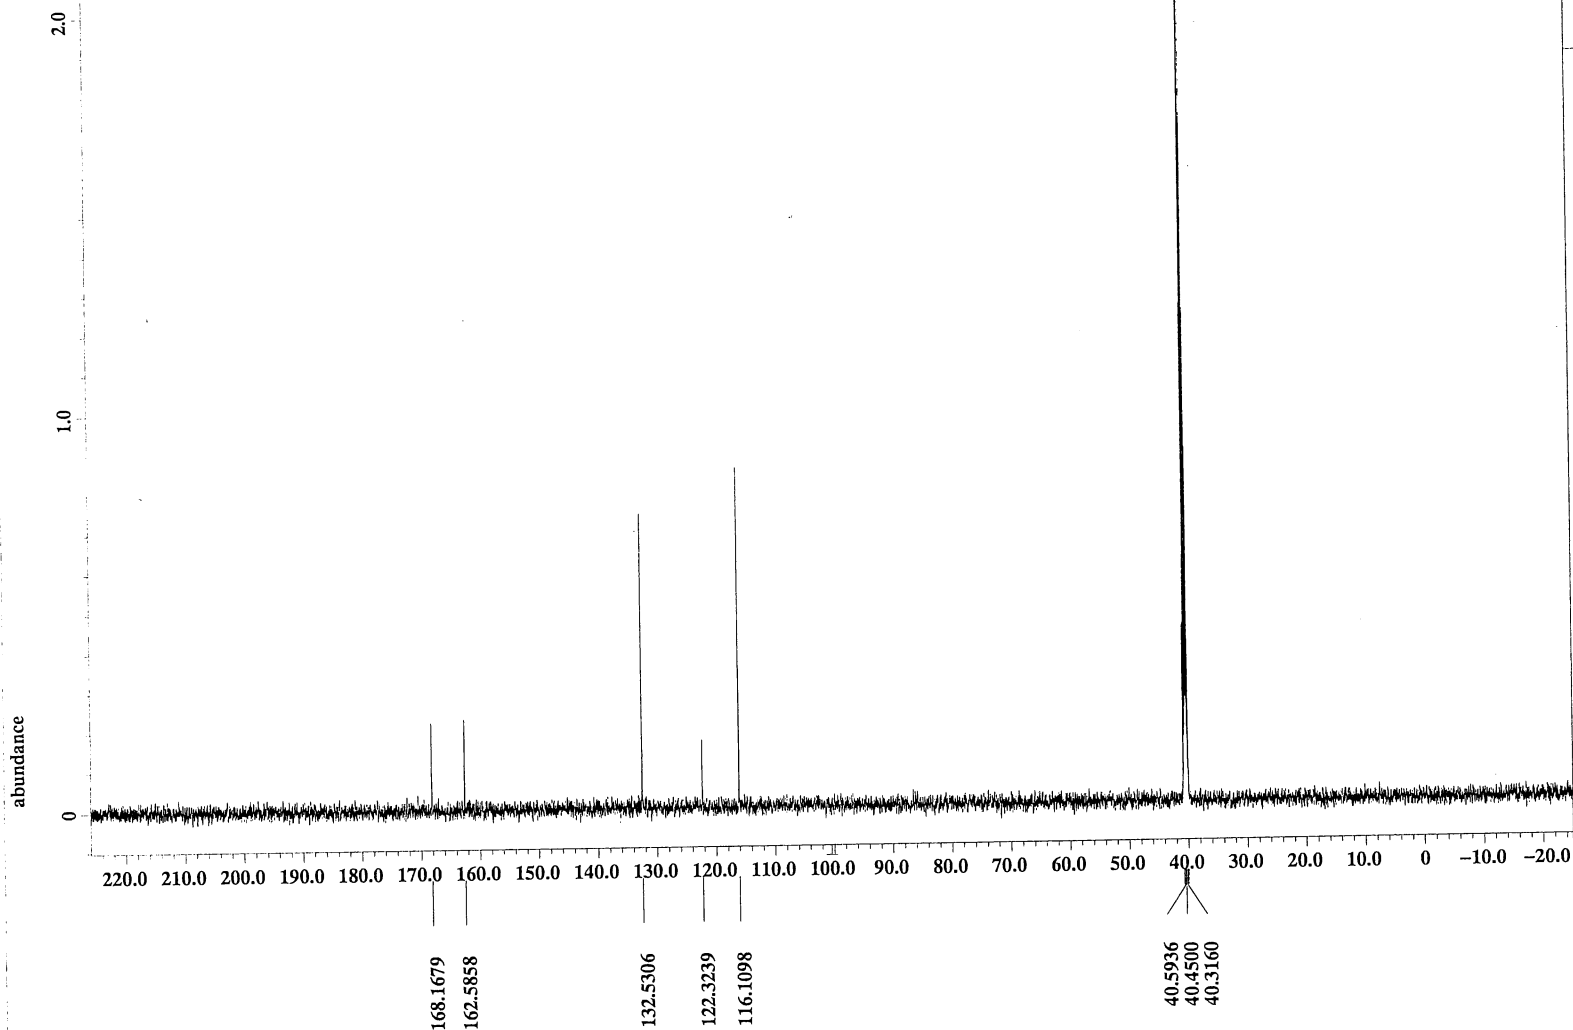

X : parts per Million : 13C

----- PROCESSING PARAMETERS -----  
 dc\_balance : 0 : FALSE  
 sexp : 2.0[Hz] : 0.0[s]  
 trapezoid3 : 0[%] : 80[%] : 100[%]  
 zerofill : 1  
 fft : 1 : TRUE : TRUE  
 machinephase  
 ppm

Derived from: Exp-AB-R-184-6-C-1.jdf

Filename = Exp-AB-R-184-6-C-3.jd  
 Author = delta  
 Experiment = single\_pulse\_dec  
 Sample\_id = Exp-AB-R-184-6-C  
 Solvent = DMSO-D6  
 Creation\_time = 31-AUG-2020 11:23:14  
 Revision\_time = 31-AUG-2020 11:30:45  
 Current\_time = 31-AUG-2020 11:30:55

Comment = Exp-AB-R-184-6-C  
 Data\_format = 1D COMPLEX  
 Dim\_size = 26214  
 Dim\_title = 13C  
 Dim\_units = [ppm]  
 Dimensions = X  
 Site = ECA 600  
 Spectrometer = DELTA2\_NMR

Field\_strength = 14.09636928[T] (600[M]  
 X\_acq\_duration = 0.69206016[s]  
 X\_domain = 13C  
 X\_freq = 150.91343039[MHz]  
 X\_offset = 100[ppm]  
 X\_points = 32768  
 X\_prescans = 4  
 X\_resolution = 1.44496109[Hz]  
 X\_sweep = 47.34848485[kHz]  
 Irr\_domain = 1H  
 Irr\_freq = 600.1723046[MHz]  
 Irr\_offset = 5[ppm]  
 Clipped = FALSE  
 Mod\_return = 1  
 Scans = 55  
 Total\_scans = 55

X\_90\_width = 12.3[us]  
 X\_acq\_time = 0.69206016[s]  
 X\_angle = 30[deg]  
 X\_atn = 7.5[dB]  
 X\_pulse = 4.1[us]  
 Irr\_atn\_dec = 18.62[dB]  
 Irr\_atn\_noe = 18.62[dB]  
 Irr\_noise = WALTZ  
 Decoupling = TRUE  
 Initial\_wait = 1[s]  
 Noe = TRUE  
 Noe\_time = 2[s]  
 Recvr\_gain = 60  
 Relaxation\_delay = 2[s]  
 Repetition\_time = 2.69206016[s]  
 Temp\_get = 21.8[dc]

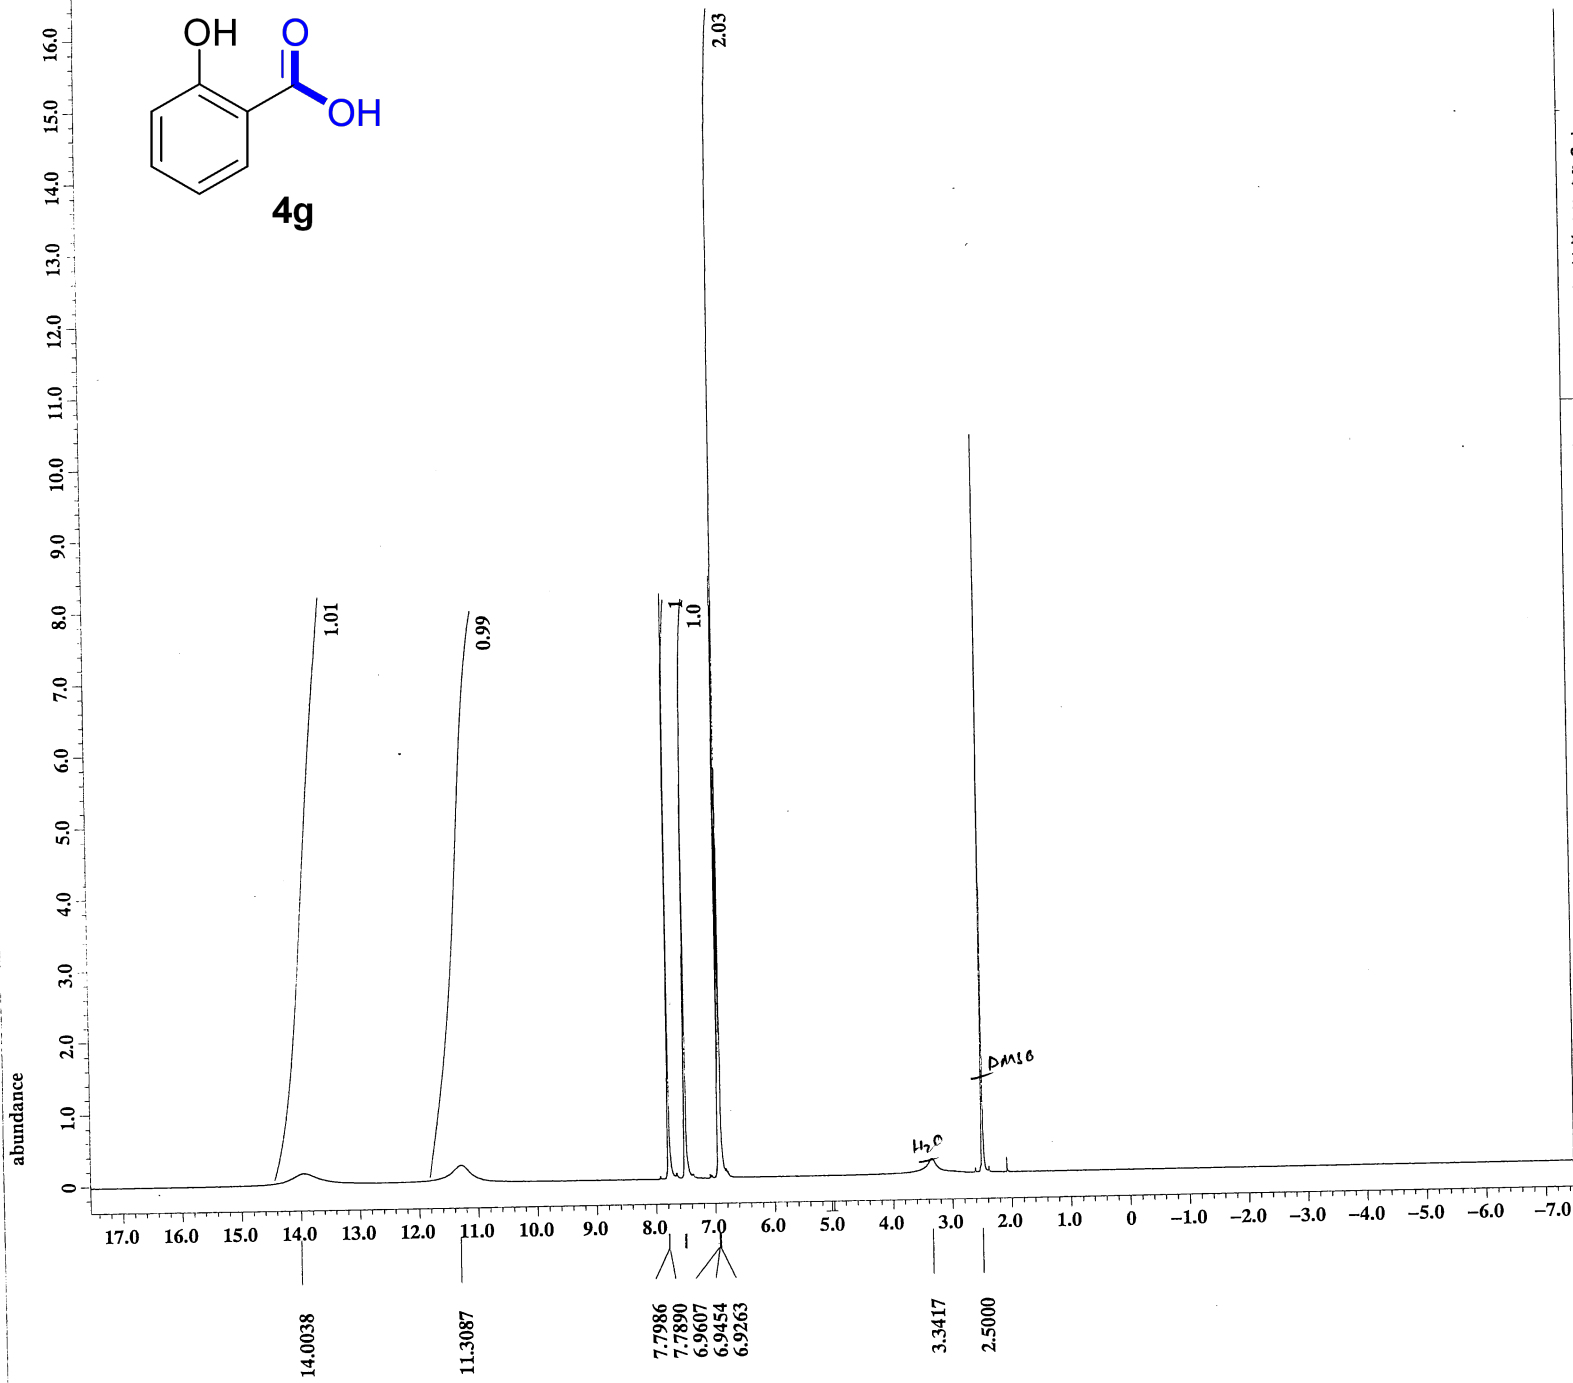

----- PROCESSING PARAMETERS -----  
 dc\_balance : 0 : FALSE  
 sexp : 0.2[Hz] : 0.0[s]  
 trapezoid3 : 0[%] : 80[%] : 100[%]  
 zerofill : 1  
 fft : 1 : TRUE : TRUE  
 machinephase  
 ppm

Derived from: Exp-R-184-4-P-1.jdf

Filename = Exp-R-184-4-P-4.jdf  
 Author = delta  
 Experiment = single\_pulse.ex2  
 Sample\_id = Exp-R-184-4-P  
 Solvent = DMSO-D6  
 Creation\_time = 18-APR-2019 16:31:12  
 Revision\_time = 18-APR-2019 16:39:25  
 Current\_time = 18-APR-2019 16:39:40

Comment = Exp-R-184-4-P  
 Data\_format = 1D COMPLEX  
 Dim\_size = 13107  
 Dim\_title = 1H  
 Dim\_units = [ppm]  
 Dimensions = X  
 Site = ECA 600  
 Spectrometer = DELTA2\_NMR

Field\_strength = 14.09636928[T] (600[M]  
 X\_acq\_duration = 0.87293952[s]  
 X\_domain = 1H  
 X\_freq = 600.1723046[MHz]  
 X\_offset = 5[ppm]  
 X\_points = 16384  
 X\_prescans = 1  
 X\_resolution = 1.14555473[Hz]  
 X\_sweep = 18.76876877[kHz]  
 Irr\_domain = 1H  
 Irr\_freq = 600.1723046[MHz]  
 Irr\_offset = 5[ppm]  
 Tri\_domain = 1H  
 Tri\_freq = 600.1723046[MHz]  
 Tri\_offset = 5[ppm]  
 Clipped = FALSE  
 Mod\_return = 1  
 Scans = 8  
 Total\_scans = 8

X\_90\_width = 13.17[us]  
 X\_acq\_time = 0.87293952[s]  
 X\_angle = 45[deg]  
 X\_atn = 3.4[dB]  
 X\_pulse = 6.585[us]  
 Irr\_mode = Off  
 Tri\_mode = Off  
 Dante\_presat = FALSE  
 Initial\_wait = 1[s]  
 Recvr\_gain = 56  
 Relaxation\_delay = 5[s]  
 Repetition\_time = 5.87293952[s]  
 Temp\_get = 20.6[dc]

X : parts per Million : 1H

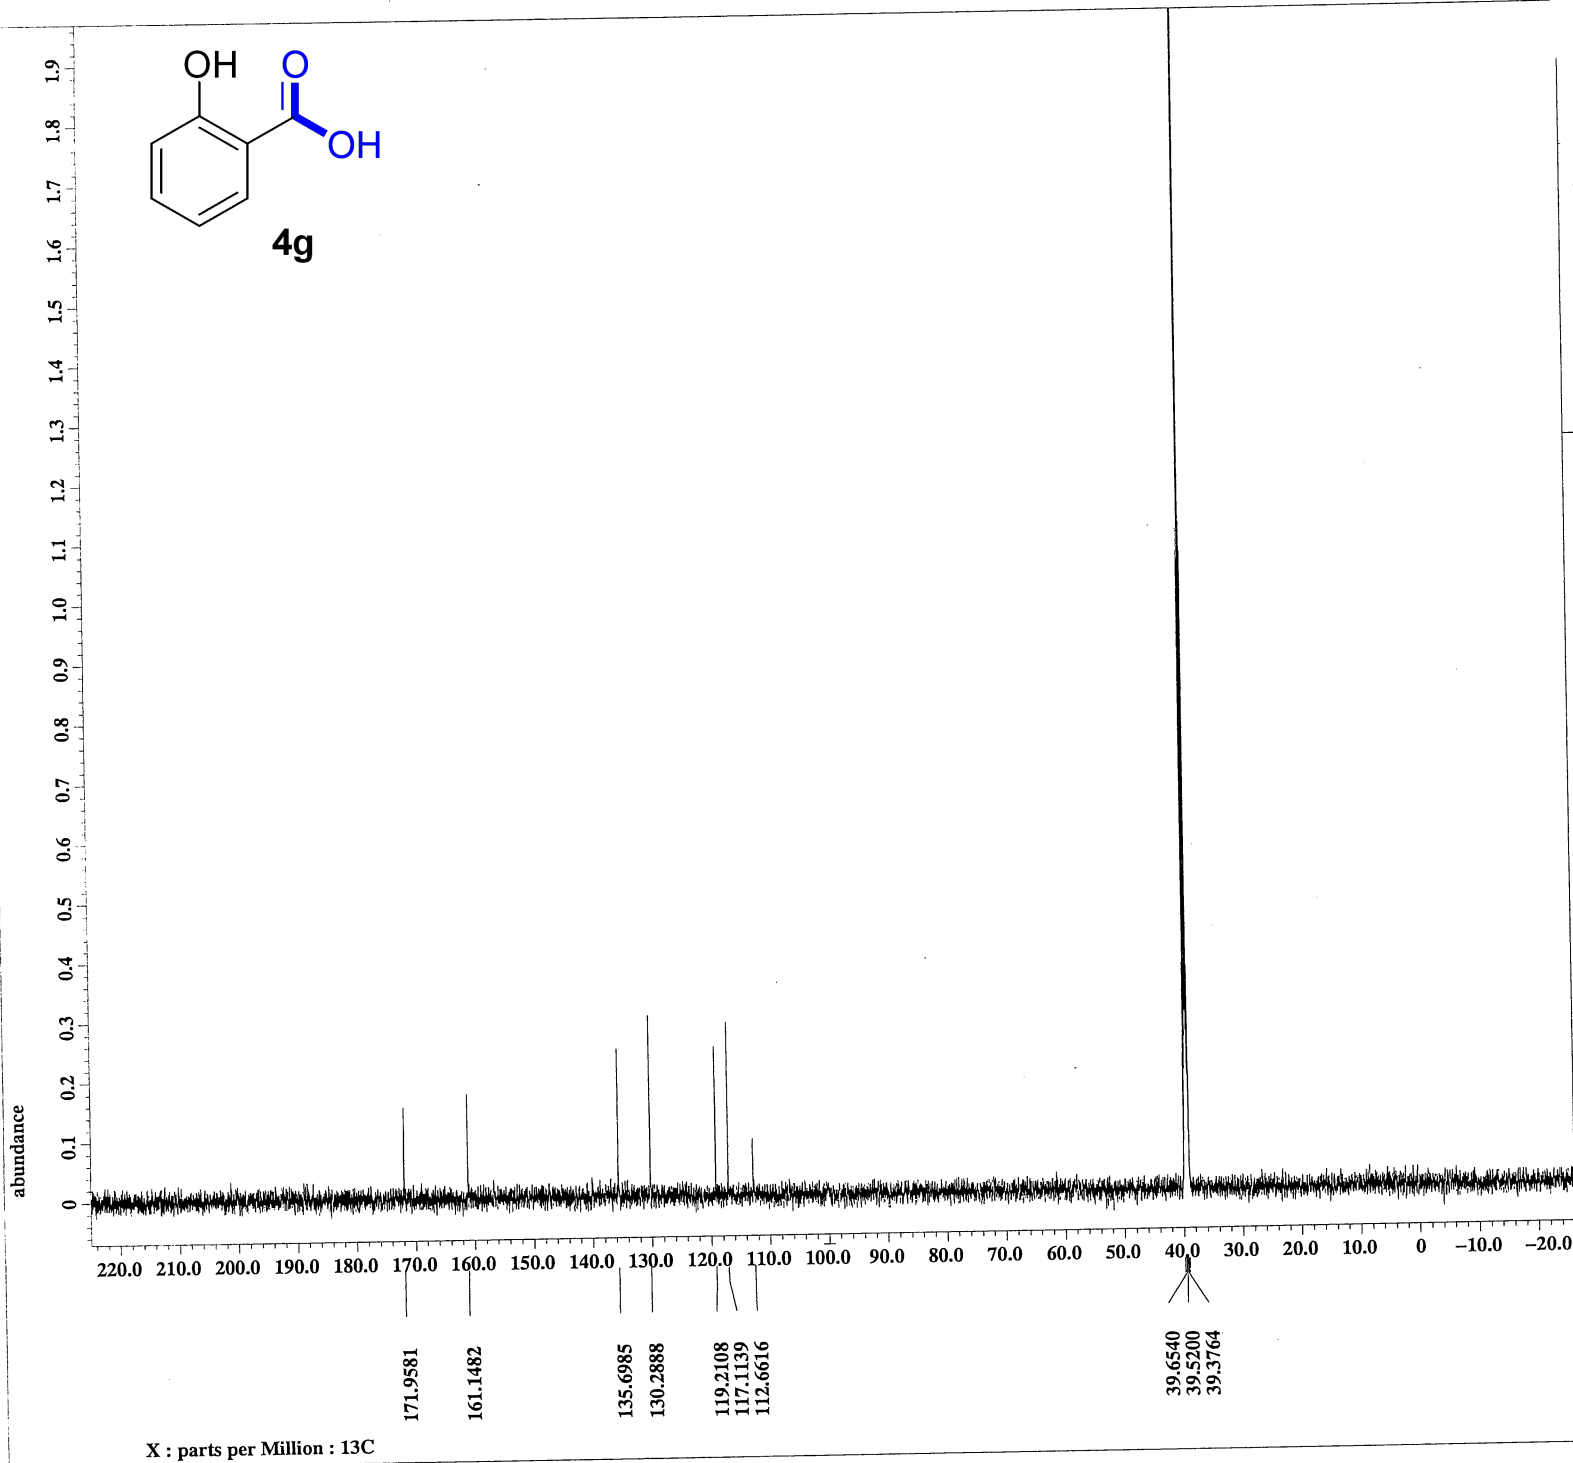

```

---- PROCESSING PARAMETERS ----
dc_balance : 0 : FALSE
sexp : 2.0[Hz] : 0.0[s]
trapezoid3 : 0[%] : 80[%] : 100[%]
zerofill : 1
fft : 1 : TRUE : TRUE
machinephase
ppm

```

Derived from: Exp-R-184-4-C-1.jdf

```

Filename      = Exp-R-184-4-C-3.jdf
Author       = delta
Experiment   = single_pulse_dec
Sample_id    = Exp-R-184-4-C
Solvent      = DMSO-D6
Creation_time = 18-APR-2019 16:35:36
Revision_time = 18-APR-2019 16:41:11
Current_time  = 18-APR-2019 16:41:16

```

```

Comment      = Exp-R-184-4-C
Data_format  = 1D COMPLEX
Dim_size     = 26214
Dim_title    = 13C
Dim_units    = [ppm]
Dimensions   = X
Site         = ECA 600
Spectrometer = DELTA2_NMR

```

```

Field_strength = 14.09636928[T] (600[M]
X_acq_duration = 0.69206016[s]
X_domain       = 13C
X_freq         = 150.91343039[MHz]
X_offset       = 100[ppm]
X_points       = 32768
X_prescans     = 4
X_resolution   = 1.44496109[Hz]
X_sweep        = 47.34848485[kHz]
Irr_domain     = 1H
Irr_freq       = 600.1723046[MHz]
Irr_offset     = 5[ppm]
Clipped        = FALSE
Mod_return     = 1
Scans          = 82
Total_scans    = 82

```

```

X_90_width    = 12.7[us]
X_acq_time     = 0.69206016[s]
X_angle        = 30[deg]
X_atn          = 7.5[db]
X_pulse        = 4.23333333[us]
Irr_atn_dec    = 18.62[db]
Irr_atn_noe    = 18.62[db]
Irr_noise      = WALTZ
Decoupling     = TRUE
Initial_wait   = 1[s]
Noe            = TRUE
Noe_time       = 2[s]
Recvr_gain     = 60
Relaxation_delay = 2[s]
Repetition_time = 2.69206016[s]
Temp_get       = 21.7[dc]

```

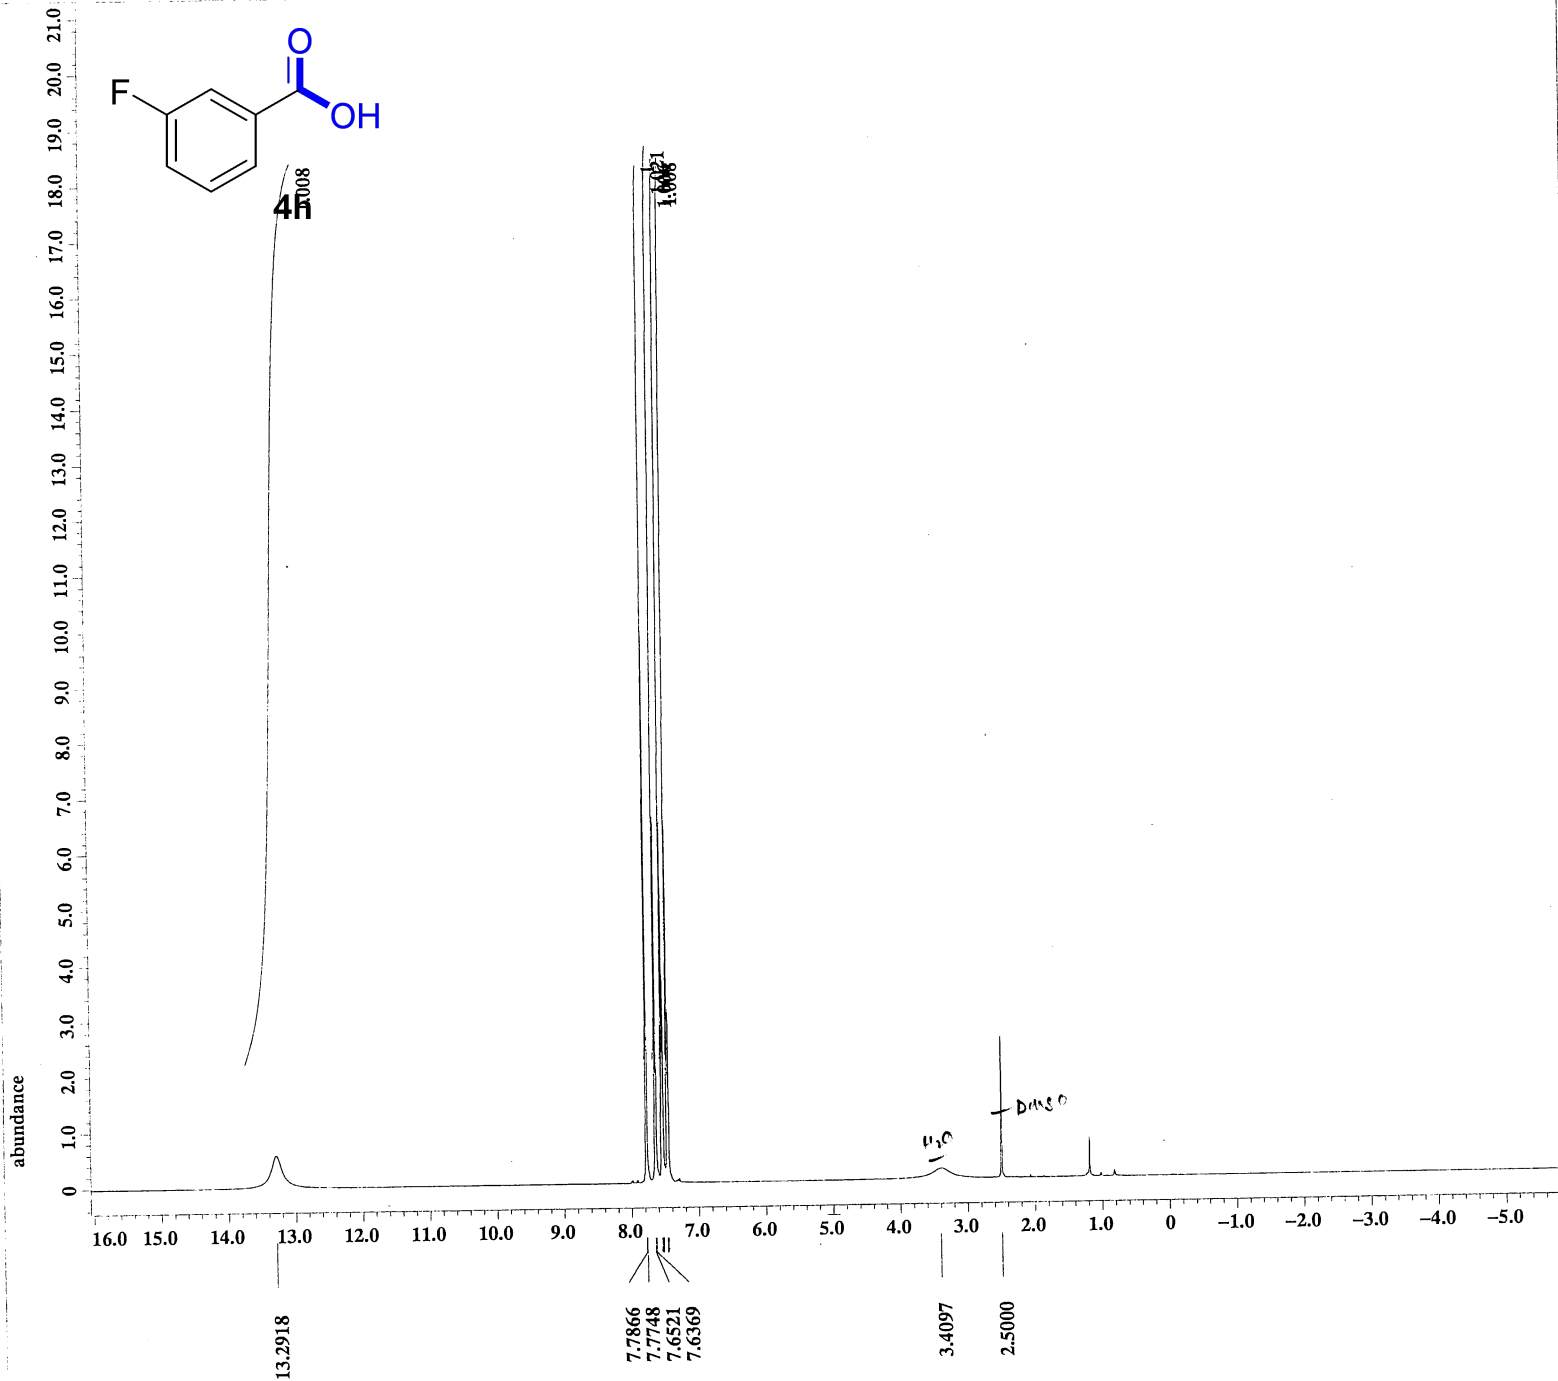

```

Filename      = Exp-R-124-20b-P-5.jdf
Author       = delta
Experiment   = single_pulse.ex2
Sample_id    = Exp-R-124-20b-P
Solvent      = DMSO-D6
Creation_time = 14-AUG-2018 16:32:06
Revision_time = 14-AUG-2018 17:04:57
Current_time  = 14-AUG-2018 17:05:01
  
```

```

Content       = Exp-R-124-20b-P
Data_format   = 1D COMPLEX
Dim_size      = 13107
Dim_title     = 1H
Dim_units     = [ppm]
Dimensions    = X
Site          = ECA 600
Spectrometer  = DELTA2_NMR
  
```

```

Field_strength = 14.09636928[T] (600[M]
X_acq_duration = 0.99090432[s]
X_domain       = 1H
X_freq         = 600.1723046[MHz]
X_offset       = 5[ppm]
X_points       = 16384
X_prescans     = 1
X_resolution   = 1.00917917[Hz]
X_sweep        = 16.53439153[kHz]
Irr_domain     = 1H
Irr_freq       = 600.1723046[MHz]
Irr_offset     = 5[ppm]
Tri_domain     = 1H
Tri_freq       = 600.1723046[MHz]
Tri_offset     = 5[ppm]
Clipped        = FALSE
Mod_return     = 1
Scans          = 8
Total_scans    = 8
  
```

```

X_90_width    = 12.68[us]
X_acq_time     = 0.99090432[s]
X_angle        = 45[deg]
X_atn          = 3.4[db]
X_pulse        = 6.34[us]
Irr_mode       = Off
Tri_mode       = Off
Dante_presat   = FALSE
Initial_wait   = 1[s]
Recvr_gain     = 46
Relaxation_delay = 5[s]
Repetition_time = 5.99090432[s]
Temp_get       = 22.2[dc]
  
```

X : parts per Million : 1H

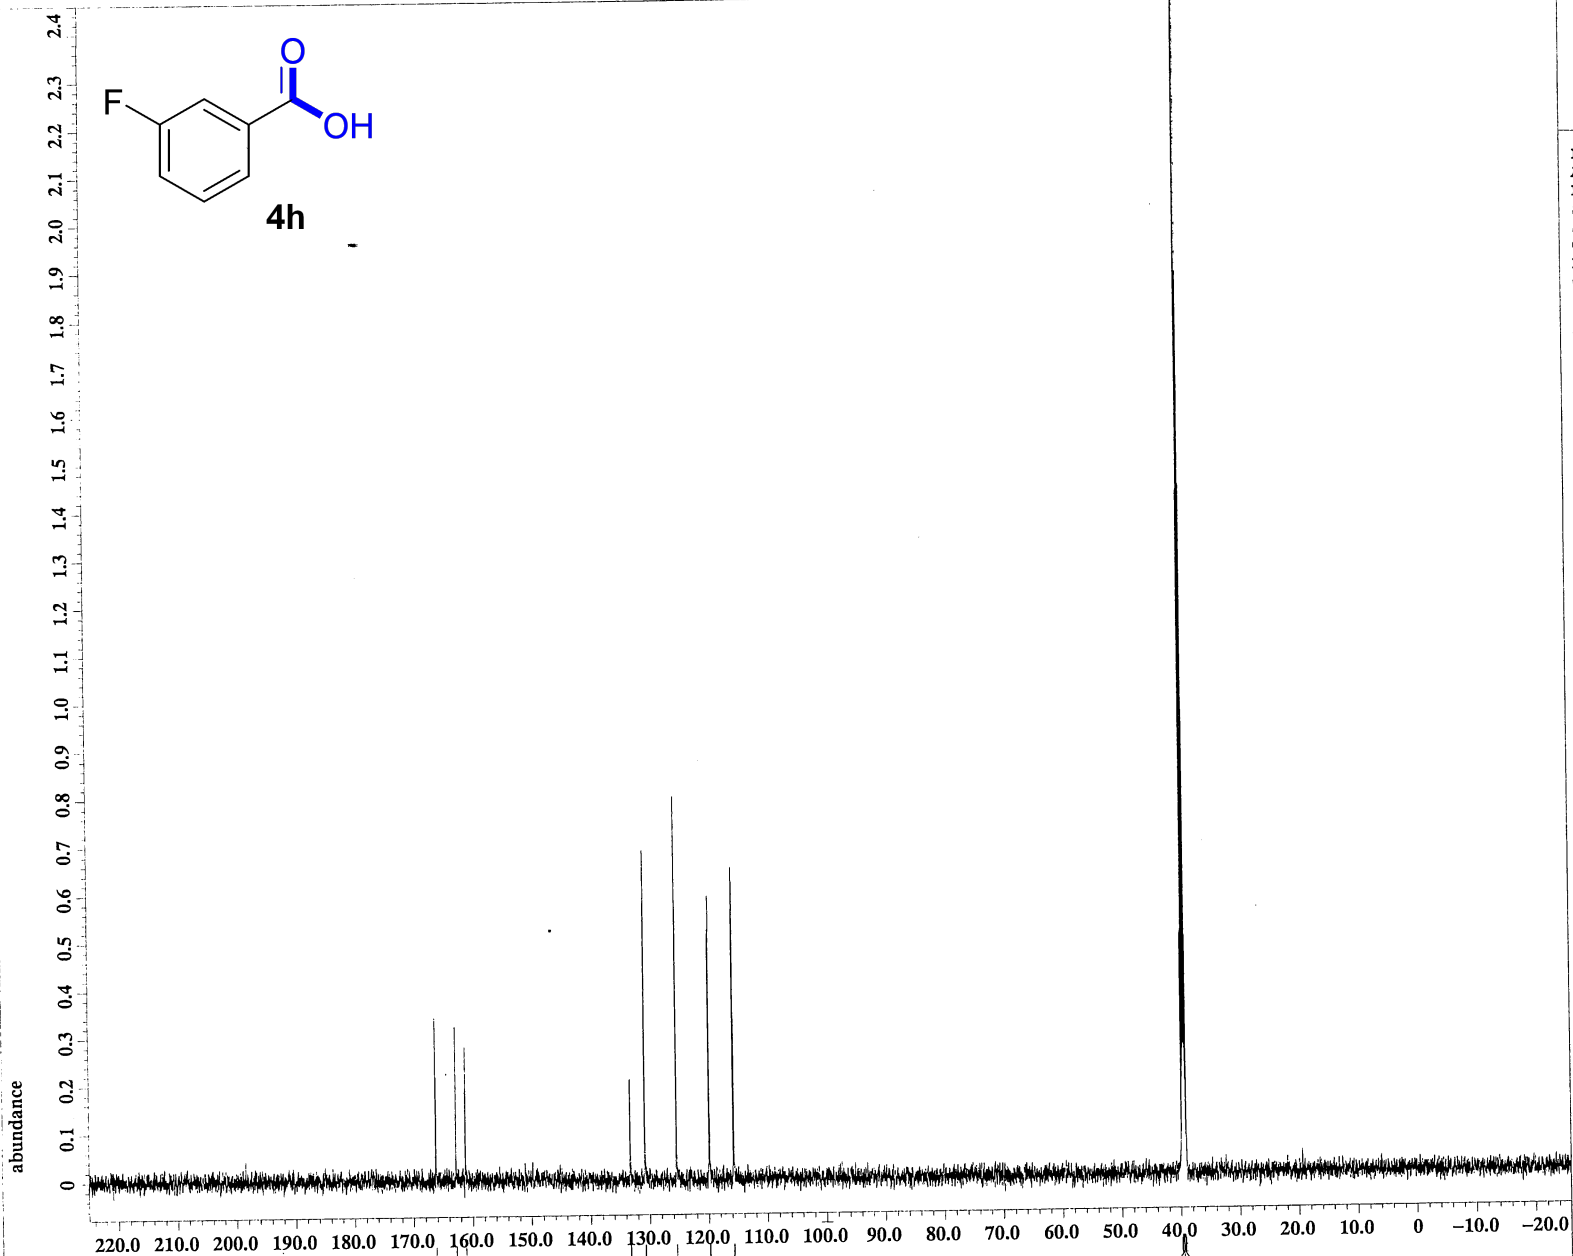

```

Filename      = Exp-R-124-20b-C-3.jdf
Author       = delta
Experiment   = single_pulse_dec
Sample_id    = Exp-R-124-20b-C
Solvent      = DMSO-D6
Creation_time = 14-AUG-2018 16:36:26
Revision_time = 14-AUG-2018 17:06:36
Current_time  = 14-AUG-2018 17:07:02

Content      = Exp-R-124-20b-C
Data_format  = 1D COMPLEX
Dim_size     = 26214
Dim_title    = 13C
Dim_units    = [ppm]
Dimensions   = X
Site         = ECA 600
Spectrometer = DELTA2_NMR

Field_strength = 14.09636928 [T] (600[M]
X_acq_duration = 0.69206016 [s]
X_domain       = 13C
X_freq         = 150.91343039 [MHZ]
X_offset       = 100 [ppm]
X_points       = 32768
X_prescans     = 4
X_resolution   = 1.44496109 [Hz]
X_sweep        = 47.34848485 [kHz]
Irr_domain     = 1H
Irr_freq       = 600.1723046 [MHZ]
Irr_offset     = 5 [ppm]
Clipped        = FALSE
Mod_return     = 1
Scans          = 66
Total_scans    = 66

X_90_width     = 12 [us]
X_acq_time     = 0.69206016 [s]
X_angle        = 30 [deg]
X_atn          = 7.5 [dB]
X_pulse        = 4 [us]
Irr_atn_dec    = 18.95 [dB]
Irr_atn_noe    = 18.95 [dB]
Irr_noise      = WALTZ
Decoupling     = TRUE
Initial_wait   = 1 [s]
Noe            = TRUE
Noe_time       = 2.5 [s]
Recvr_gain     = 60
Relaxation_delay = 2.5 [s]
Repetition_time = 3.19206016 [s]
Temp_get       = 22.5 [dC]
  
```

166.2516  
 162.8334  
 161.2152  
 133.2857  
 130.8441  
 130.7962  
 125.4822  
 119.9576  
 119.8235  
 115.8692  
 115.7160

39.6636  
 39.5200  
 39.3860

X : parts per Million : 13C

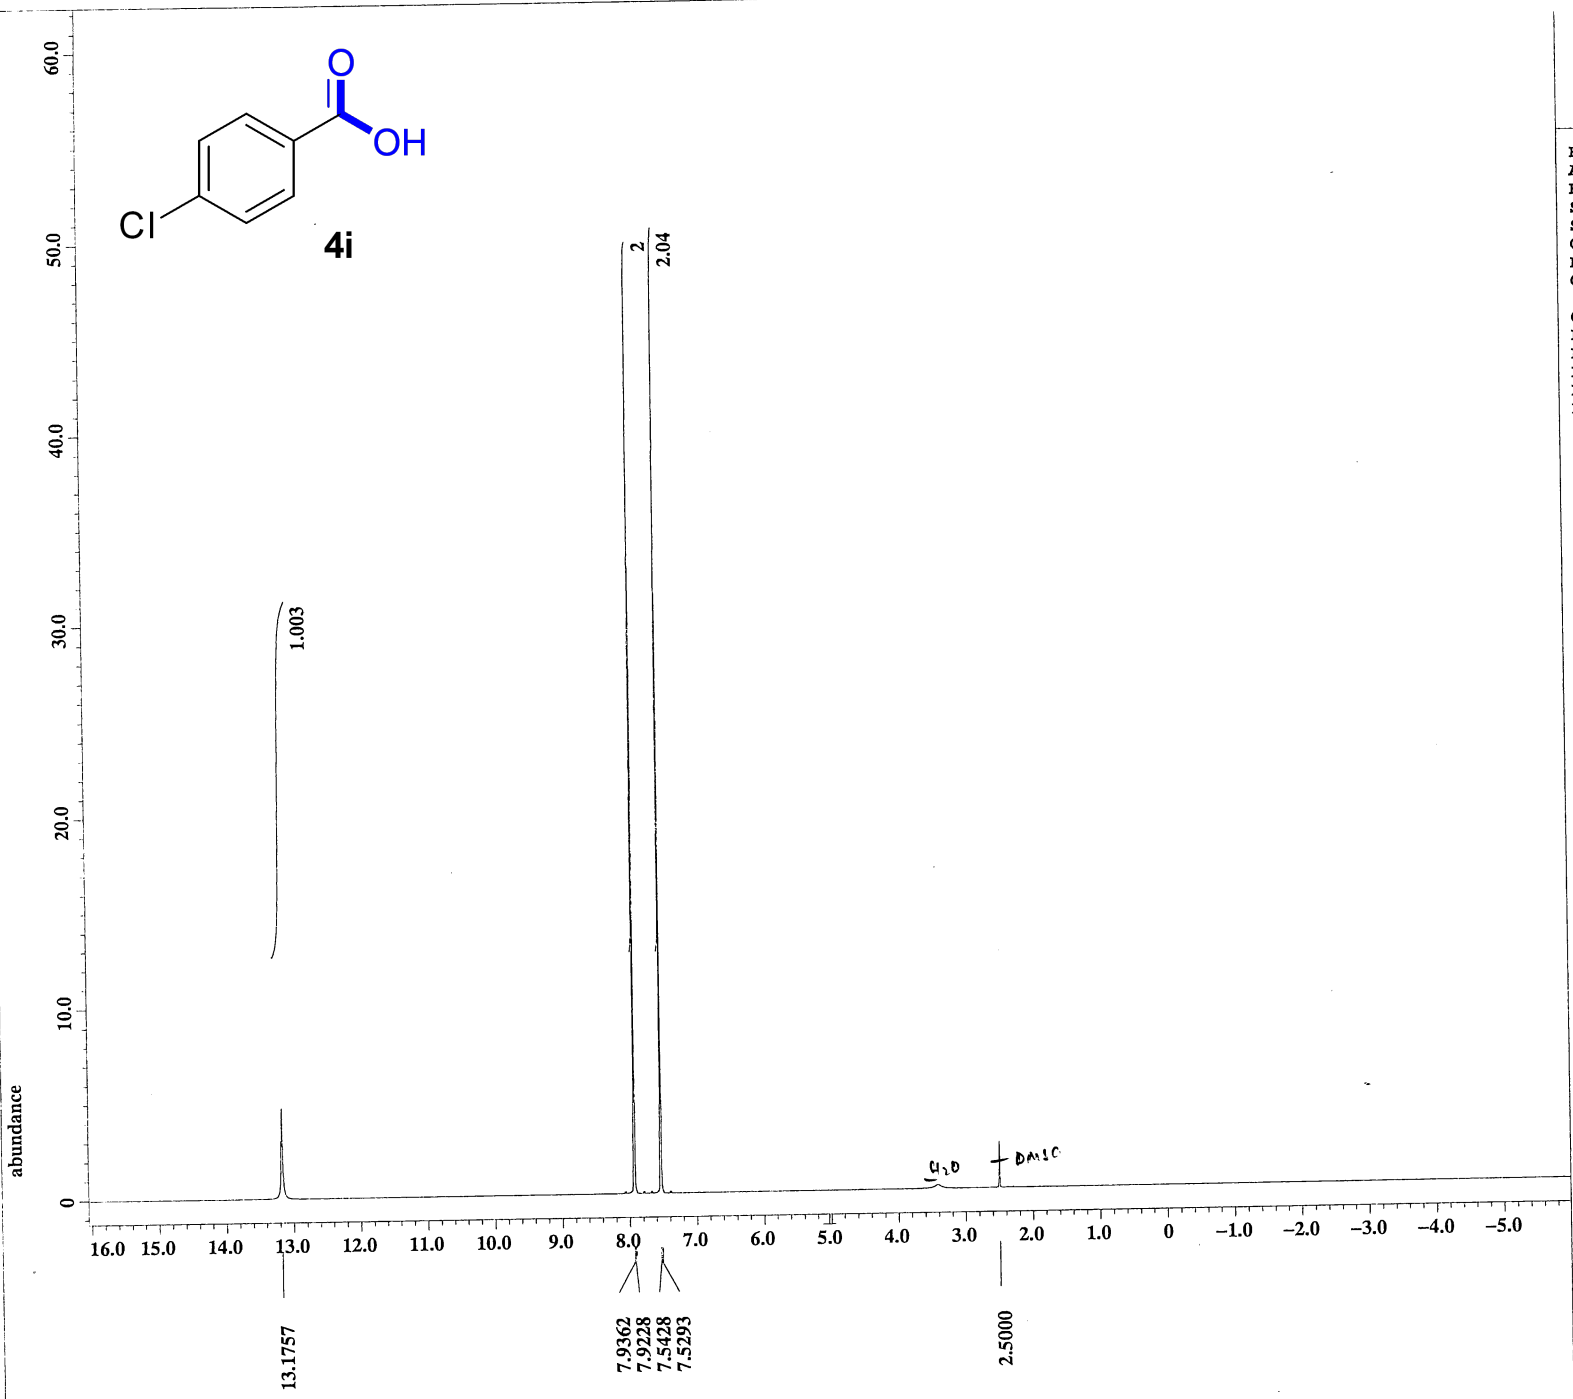

X : parts per Million : 1H

```

Filename      = Exp-R-124-p-Cl-benzoi
Author        = delta
Experiment    = single_pulse.ex2
Sample_id     = Exp-R-124-p-Cl-benzoi
Solvent       = DMSO-D6
Creation_time = 21-SEP-2018 19:34:47
Revision_time = 21-SEP-2018 19:42:54
Current_time  = 21-SEP-2018 19:42:56

Content       = Exp-R-124-p-Cl-benzoi
Data_format  = 1D COMPLEX
Dim_size     = 13107
Dim_title    = 1H
Dim_units    = [ppm]
Dimensions   = X
Site         = ECA 600
Spectrometer = DELTA2_NMR

Field_strength = 14.09636928[T] (600[M]
X_acq_duration = 0.99090432[s]
X_domain      = 1H
X_freq       = 600.1723046[MHz]
X_offset     = 5[ppm]
X_points     = 16384
X_prescans   = 1
X_resolution = 1.00917917[Hz]
X_sweep      = 16.53439153[kHz]
Irr_domain   = 1H
Irr_freq     = 600.1723046[MHz]
Irr_offset   = 5[ppm]
Tri_domain   = 1H
Tri_freq     = 600.1723046[MHz]
Tri_offset   = 5[ppm]
Clipped      = FALSE
Mod_return   = 1
Scans        = 8
Total_scans  = 8

X_90_width   = 12.68[us]
X_acq_time   = 0.99090432[s]
X_angle      = 45[deg]
X_atn        = 3.4[dB]
X_pulse      = 6.34[us]
Irr_mode     = Off
Tri_mode     = Off
Dante_presat = FALSE
Initial_wait = 1[s]
Recvr_gain   = 44
Relaxation_delay = 5[s]
Repetition_time = 5.99090432[s]
Temp_get     = 21[degC]
  
```



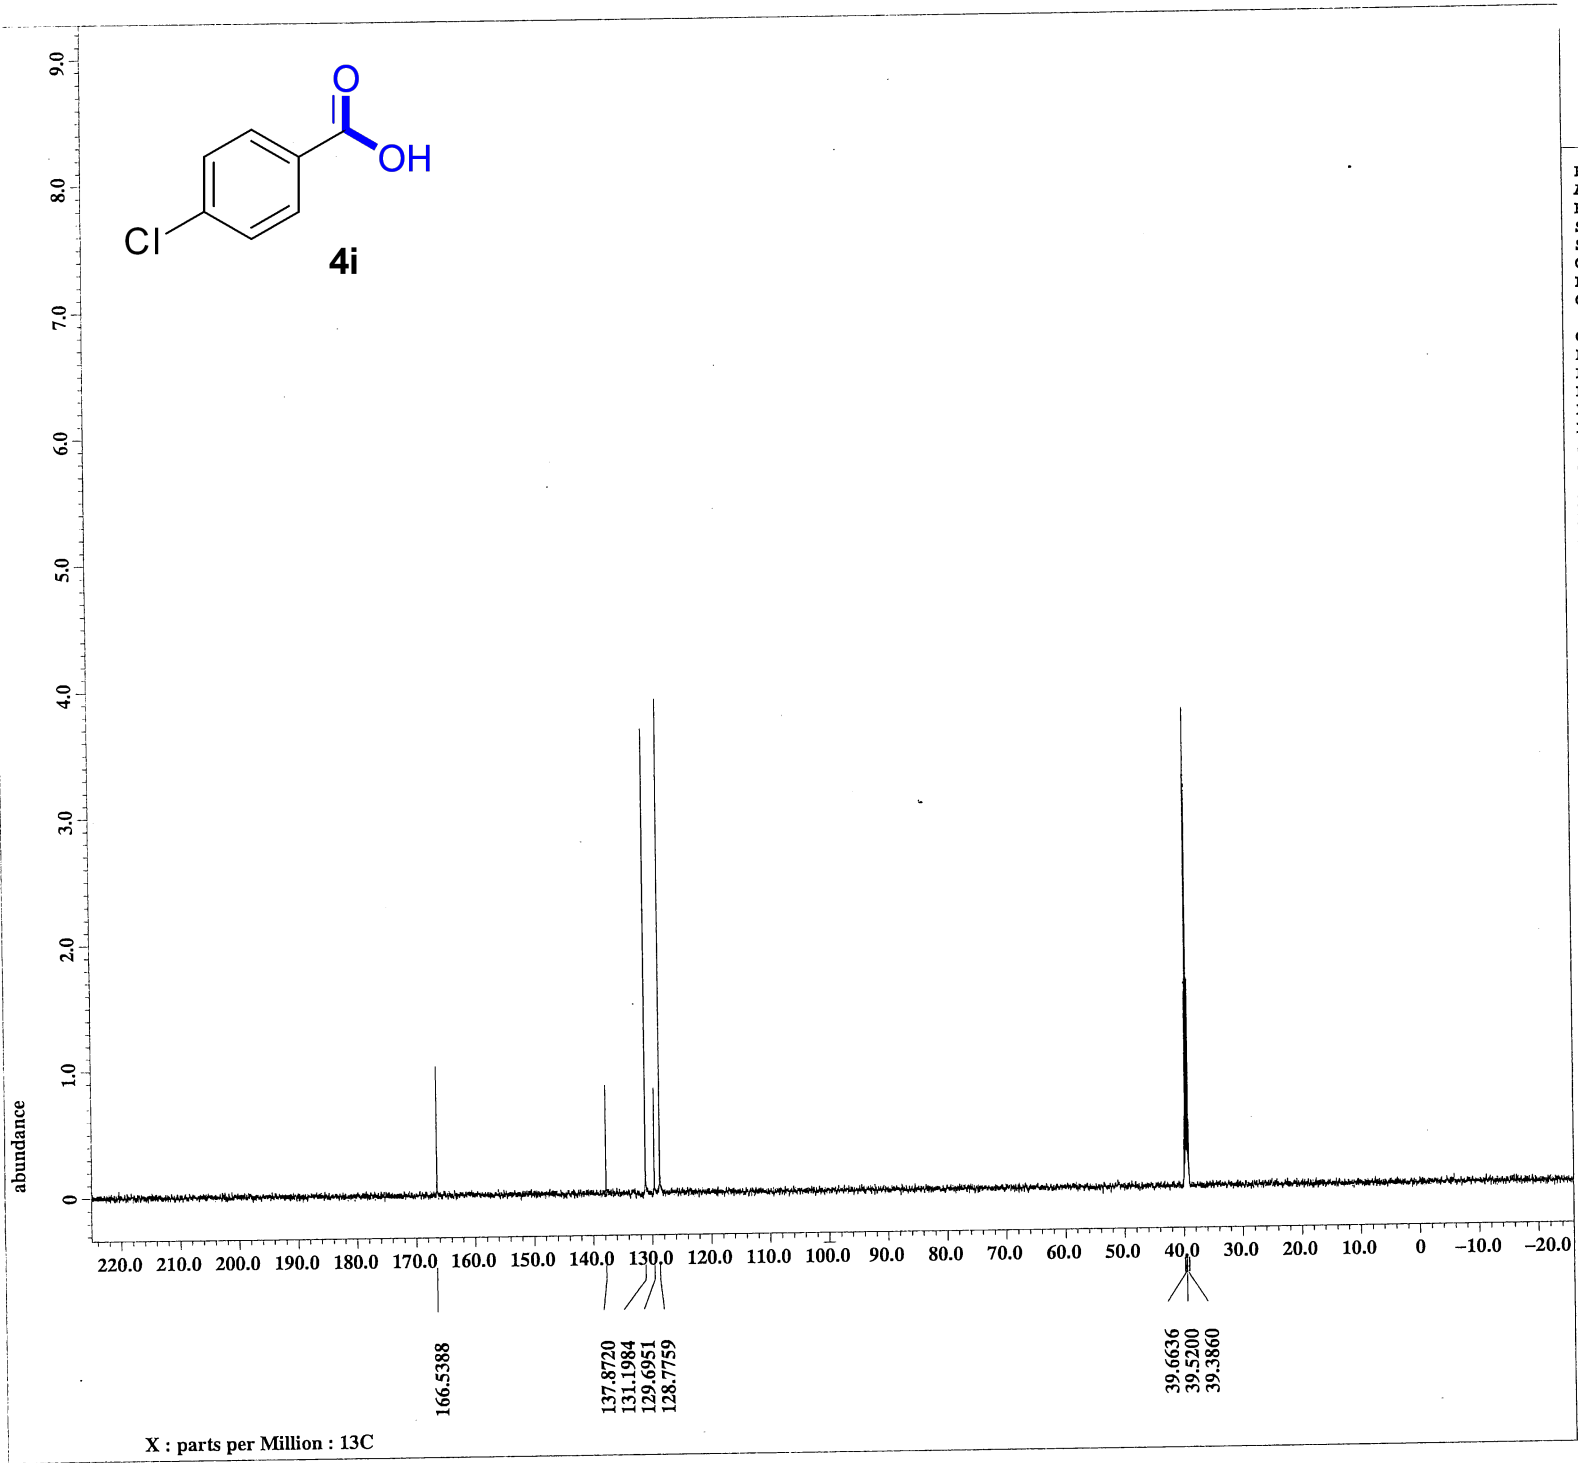

```

Filename      = Exp-R-124-p-Cl-benzoi
Author        = delta
Experiment    = single_pulse_dec
Sample_id     = Exp-R-124-p-Cl-benzoi
Solvent       = DMSO-D6
Creation_time = 21-SEP-2018 19:37:17
Revision_time = 21-SEP-2018 19:45:50
Current_time  = 21-SEP-2018 19:45:58

Content       = Exp-R-124-p-Cl-benzoi
Data_format  = 1D COMPLEX
Dim_size     = 26214
Dim_title    = 13C
Dim_units    = [ppm]
Dimensions   = X
Site         = ECA 600
Spectrometer = DELTA2_NMR

Field_strength = 14.09636928[T] (600[M]
X_acq_duration = 0.69206016[s]
X_domain       = 13C
X_freq         = 150.91343039[MHz]
X_offset       = 100[ppm]
X_points       = 32768
X_prescans     = 4
X_resolution   = 1.44496109[Hz]
X_sweep        = 47.34848485[kHz]
Irr_domain     = 1H
Irr_freq       = 600.1723046[MHz]
Irr_offset     = 5[ppm]
Clipped        = FALSE
Mod_return     = 1
Scans          = 32
Total_scans    = 32

X_90_width    = 12[us]
X_acq_time     = 0.69206016[s]
X_angle        = 30[deg]
X_atn          = 7.5[dB]
X_pulse        = 4[us]
Irr_atn_dec    = 18.95[dB]
Irr_atn_noe    = 18.95[dB]
Irr_noise      = WALTZ
Decoupling     = TRUE
Initial_wait   = 1[s]
Noe            = TRUE
Noe_time       = 2.5[s]
Recvr_gain     = 60
Relaxation_delay = 2.5[s]
Repetition_time = 3.19206016[s]
Temp_get       = 21.4[dC]

```

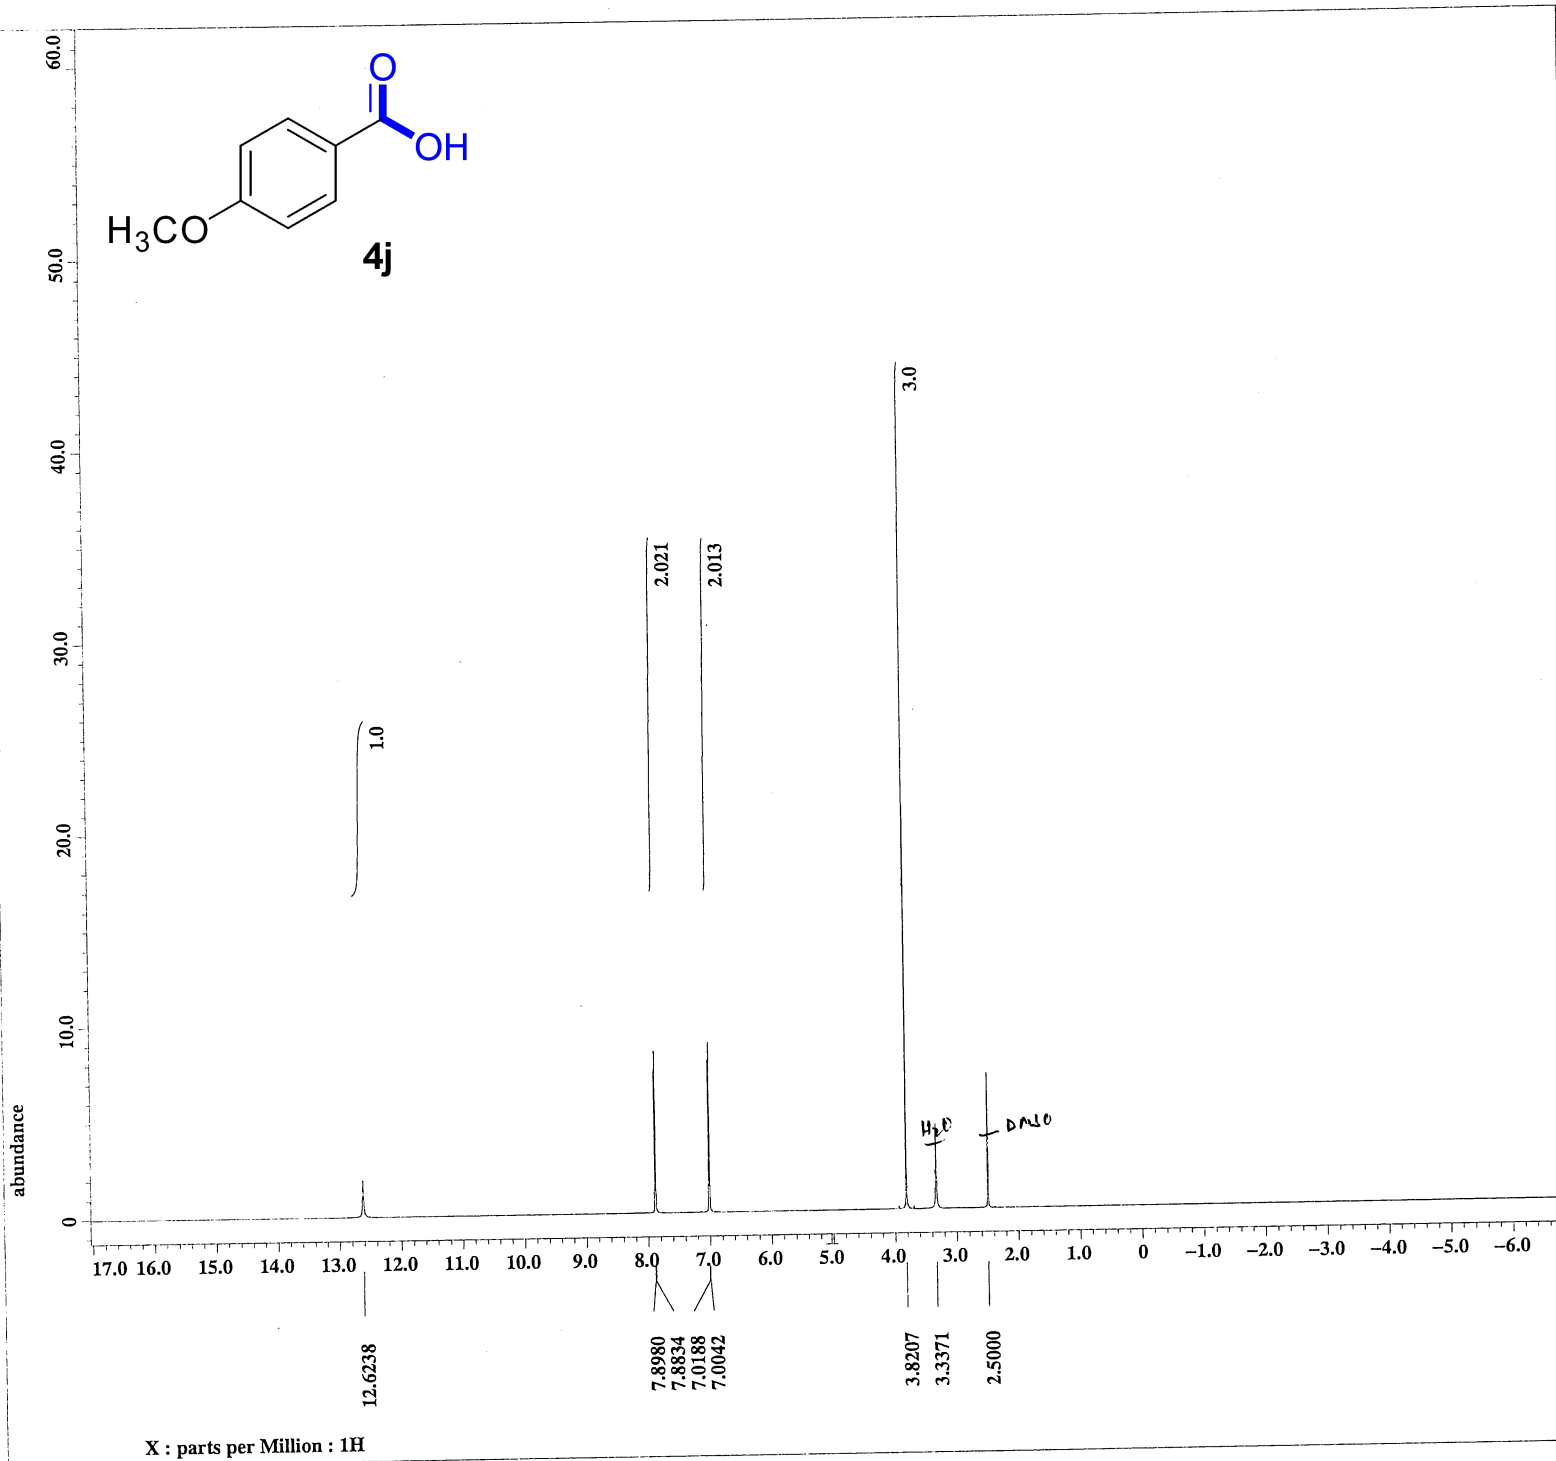

Filename = Exp-R-124-15a-P-5.jdf  
 Author = delta  
 Experiment = single\_pulse.ex2  
 Sample\_id = Exp-R-124-15a-P  
 Solvent = DMSO-D6  
 Creation\_time = 25-SEP-2018 19:29:00  
 Revision\_time = 25-SEP-2018 19:37:56  
 Current\_time = 25-SEP-2018 19:38:01

Content = Exp-R-124-15a-P  
 Data\_format = 1D COMPLEX  
 Dim\_size = 13107  
 Dim\_title = 1H  
 Dim\_units = [ppm]  
 Dimensions = X  
 Site = ECA 600  
 Spectrometer = DELTA2\_NMR

Field\_strength = 14.09636928[T] (600[M]  
 X\_acq\_duration = 0.90963968[s]  
 X\_domain = 1H  
 X\_freq = 600.1723046[MHz]  
 X\_offset = 5[ppm]  
 X\_points = 16384  
 X\_prescans = 1  
 X\_resolution = 1.09933639[Hz]  
 X\_sweep = 18.01152738[kHz]  
 Irr\_domain = 1H  
 Irr\_freq = 600.1723046[MHz]  
 Irr\_offset = 5[ppm]  
 Tri\_domain = 1H  
 Tri\_freq = 600.1723046[MHz]  
 Tri\_offset = 5[ppm]  
 Clipped = FALSE  
 Mod\_return = 1  
 Scans = 8  
 Total\_scans = 8

X\_90\_width = 12.68[us]  
 X\_acq\_time = 0.90963968[s]  
 X\_angle = 45[deg]  
 X\_atn = 3.4[dB]  
 X\_pulse = 6.34[us]  
 Irr\_mode = Off  
 Tri\_mode = Off  
 Dante\_presat = FALSE  
 Initial\_wait = 1[s]  
 Recvr\_gain = 54  
 Relaxation\_delay = 5[s]  
 Repetition\_time = 5.90963968[s]  
 Temp\_get = 21.4[degC]

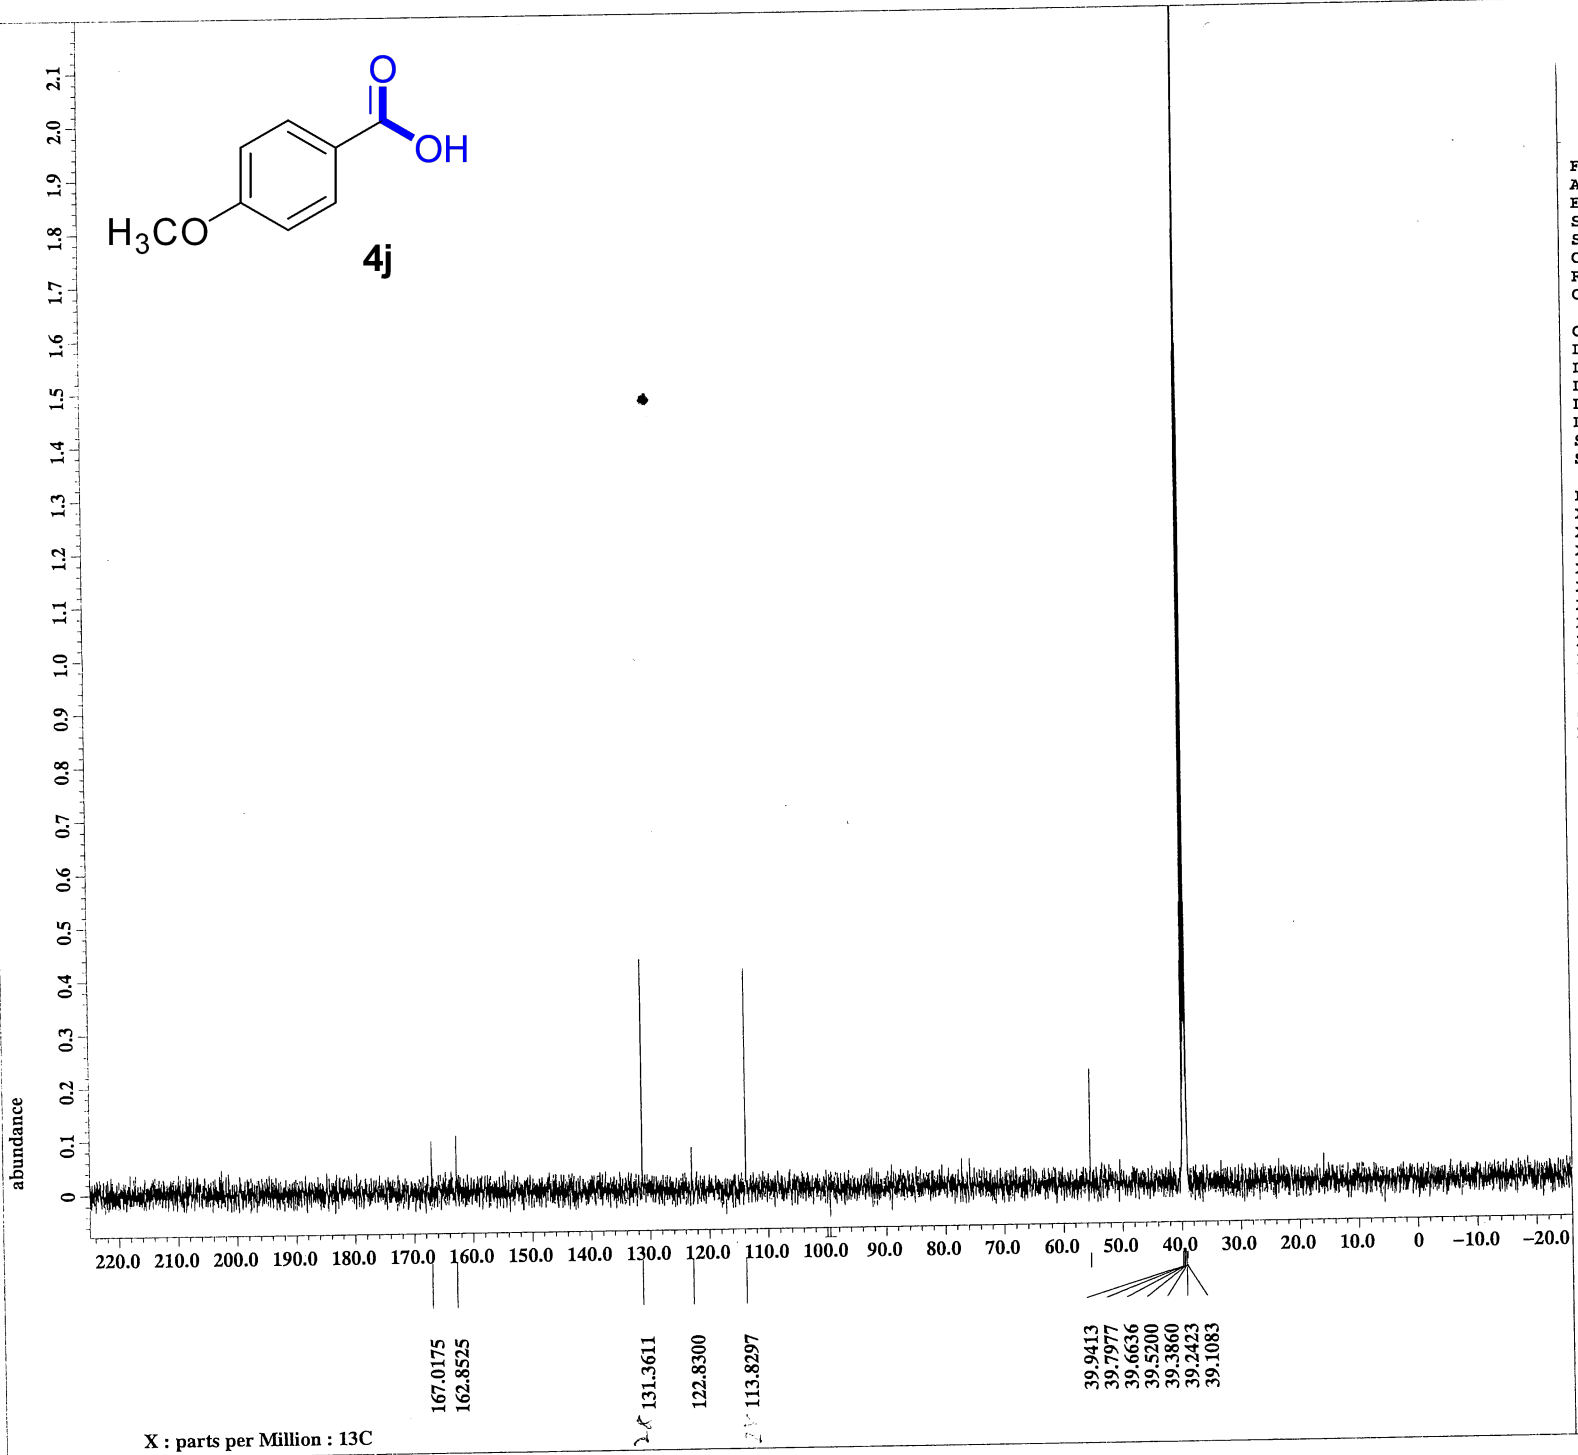

```

Filename      = Exp-R-124-15a-C-5.jdf
Author       = delta
Experiment   = single_pulse_dec
Sample_id    = Exp-R-124-15a-C
Solvent      = DMSO-D6
Creation_time = 25-SEP-2018 19:32:04
Revision_time = 25-SEP-2018 19:39:53
Current_time  = 25-SEP-2018 19:40:02

Content      = Exp-R-124-15a-C
Data_format  = 1D COMPLEX
Dim_size     = 26214
Dim_title    = 13C
Dim_units    = [ppm]
Dimensions   = X
Site         = ECA 600
Spectrometer = DELTA2_NMR

Field_strength = 14.09636928[T] (600[M
X_acq_duration = 0.69206016[s]
X_domain       = 13C
X_freq         = 150.91343039[MHz]
X_offset       = 100[ppm]
X_points       = 32768
X_prescans     = 4
X_resolution   = 1.44496109[Hz]
X_sweep        = 47.34848485[kHz]
Irr_domain     = 1H
Irr_freq       = 600.1723046[MHz]
Irr_offset     = 5[ppm]
Clipped        = FALSE
Mod_return     = 1
Scans          = 42
Total_scans    = 42

X_90_width    = 12[us]
X_acq_time    = 0.69206016[s]
X_angle       = 30[deg]
X_atn         = 7.5[dB]
X_pulse       = 4[us]
Irr_atn_dec   = 18.95[dB]
Irr_atn_noe   = 18.95[dB]
Irr_noise     = WALTZ
Decoupling    = TRUE
Initial_wait  = 1[s]
Noe           = TRUE
Noe_time      = 2.5[s]
Recvr_gain    = 60
Relaxation_delay = 2.5[s]
Repetition_time = 3.19206016[s]
Temp_get      = 21.7[dC]

```

X : parts per Million : 13C

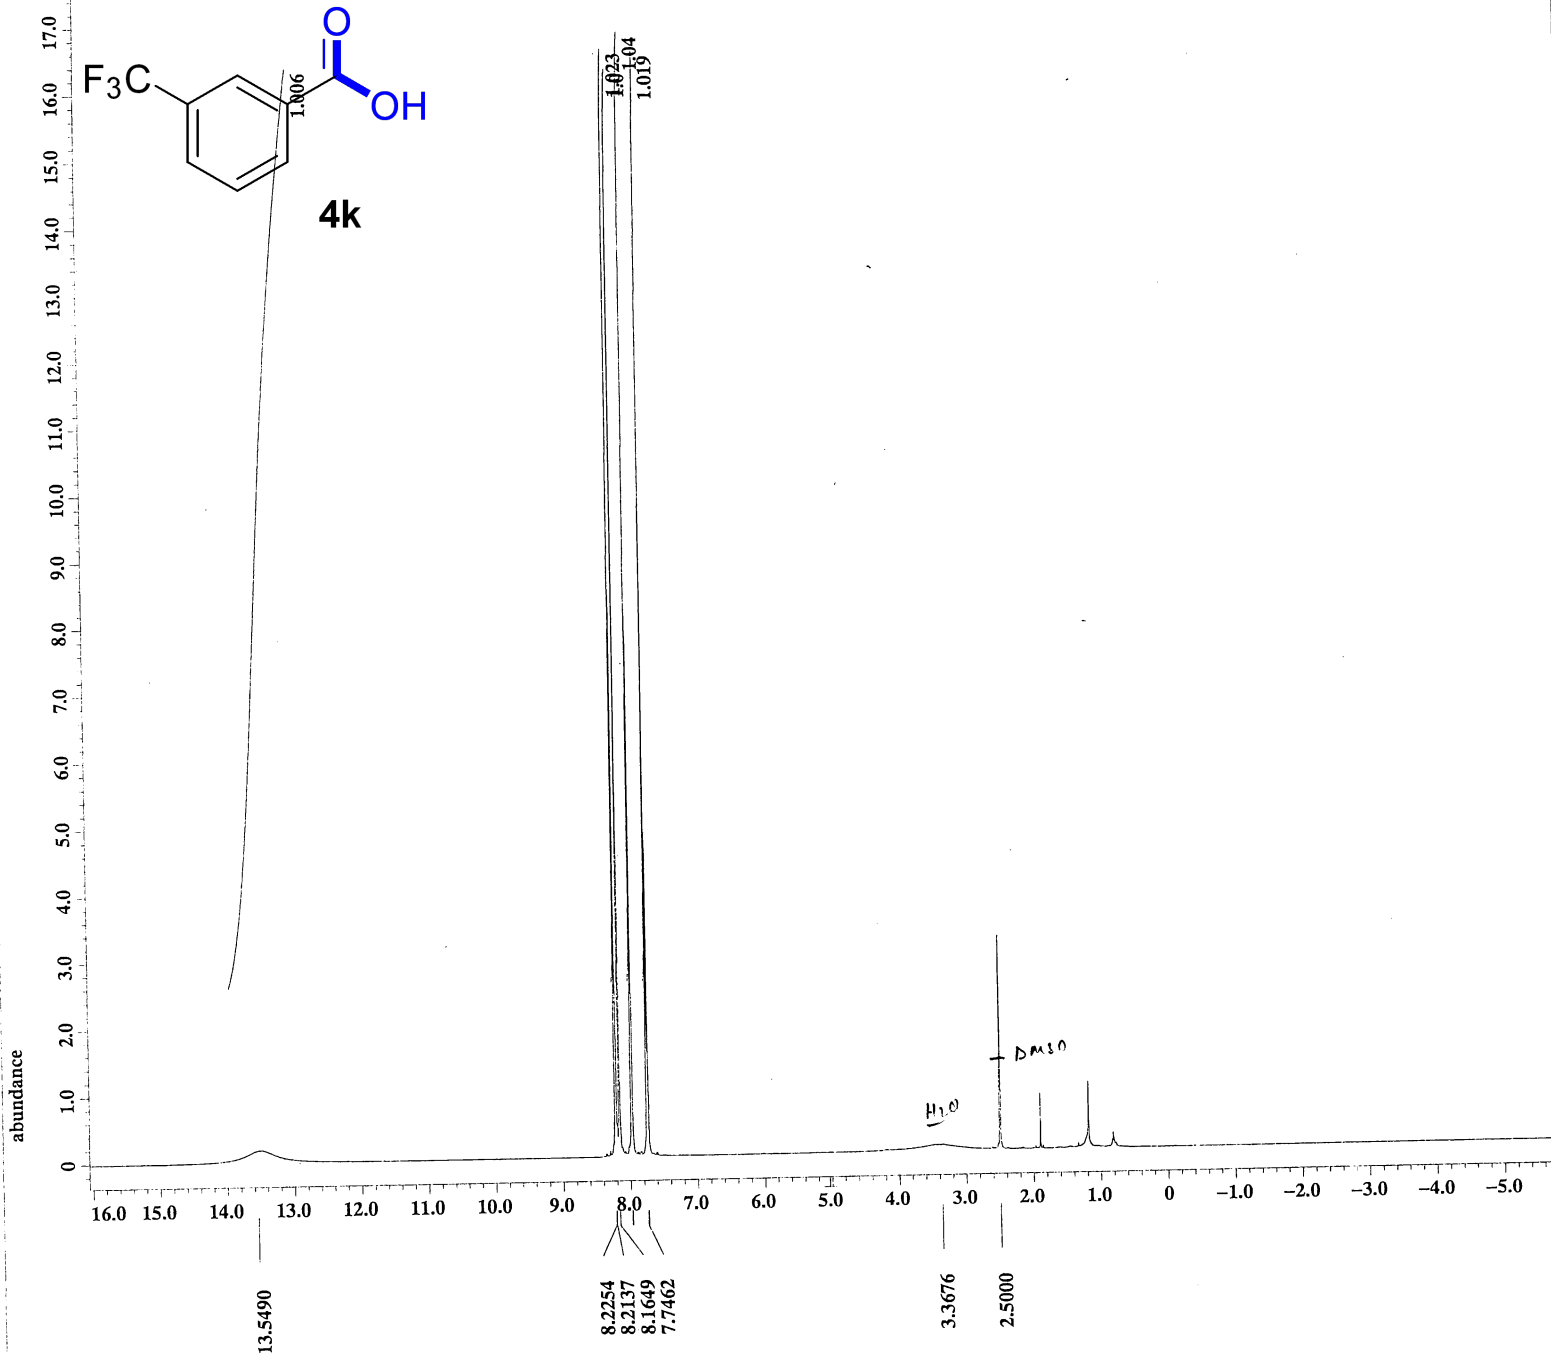

```

Filename      = Exp-R-124-22a-P-4.jdf
Author       = delta
Experiment   = single_pulse.ex2
Sample_id    = Exp-R-124-22a-P
Solvent      = DMSO-D6
Creation_time = 23-AUG-2018 18:27:10
Revision_time = 23-AUG-2018 18:32:23
Current_time  = 23-AUG-2018 18:32:26

Content       = Exp-R-124-22a-P
Data_format  = 1D COMPLEX
Dim_size     = 13107
Dim_title    = 1H
Dim_units    = [ppm]
Dimensions   = X
Site         = ECA 600
Spectrometer = DELTA2_NMR

Field_strength = 14.09636928[T] (600[M]
X_acq_duration = 0.99090432[s]
X_domain       = 1H
X_freq         = 600.1723046[MHz]
X_offset       = 5[ppm]
X_points       = 16384
X_prescans    = 1
X_resolution   = 1.00917917[Hz]
X_sweep        = 16.53439153[kHz]
Irr_domain    = 1H
Irr_freq       = 600.1723046[MHz]
Irr_offset     = 5[ppm]
Tri_domain    = 1H
Tri_freq       = 600.1723046[MHz]
Tri_offset     = 5[ppm]
Clipped       = FALSE
Mod_return    = 1
Scans         = 8
Total_scans   = 8

X_90_width    = 12.68[us]
X_acq_time    = 0.99090432[s]
X_angle       = 45[deg]
X_atn         = 3.4[dB]
X_pulse       = 6.34[us]
Irr_mode      = Off
Tri_mode      = Off
Dante_presat  = FALSE
Initial_wait  = 1[s]
Recvr_gain    = 48
Relaxation_delay = 5[s]
Repetition_time = 5.99090432[s]
Temp_get      = 21.5[dC]

```

X : parts per Million : 1H

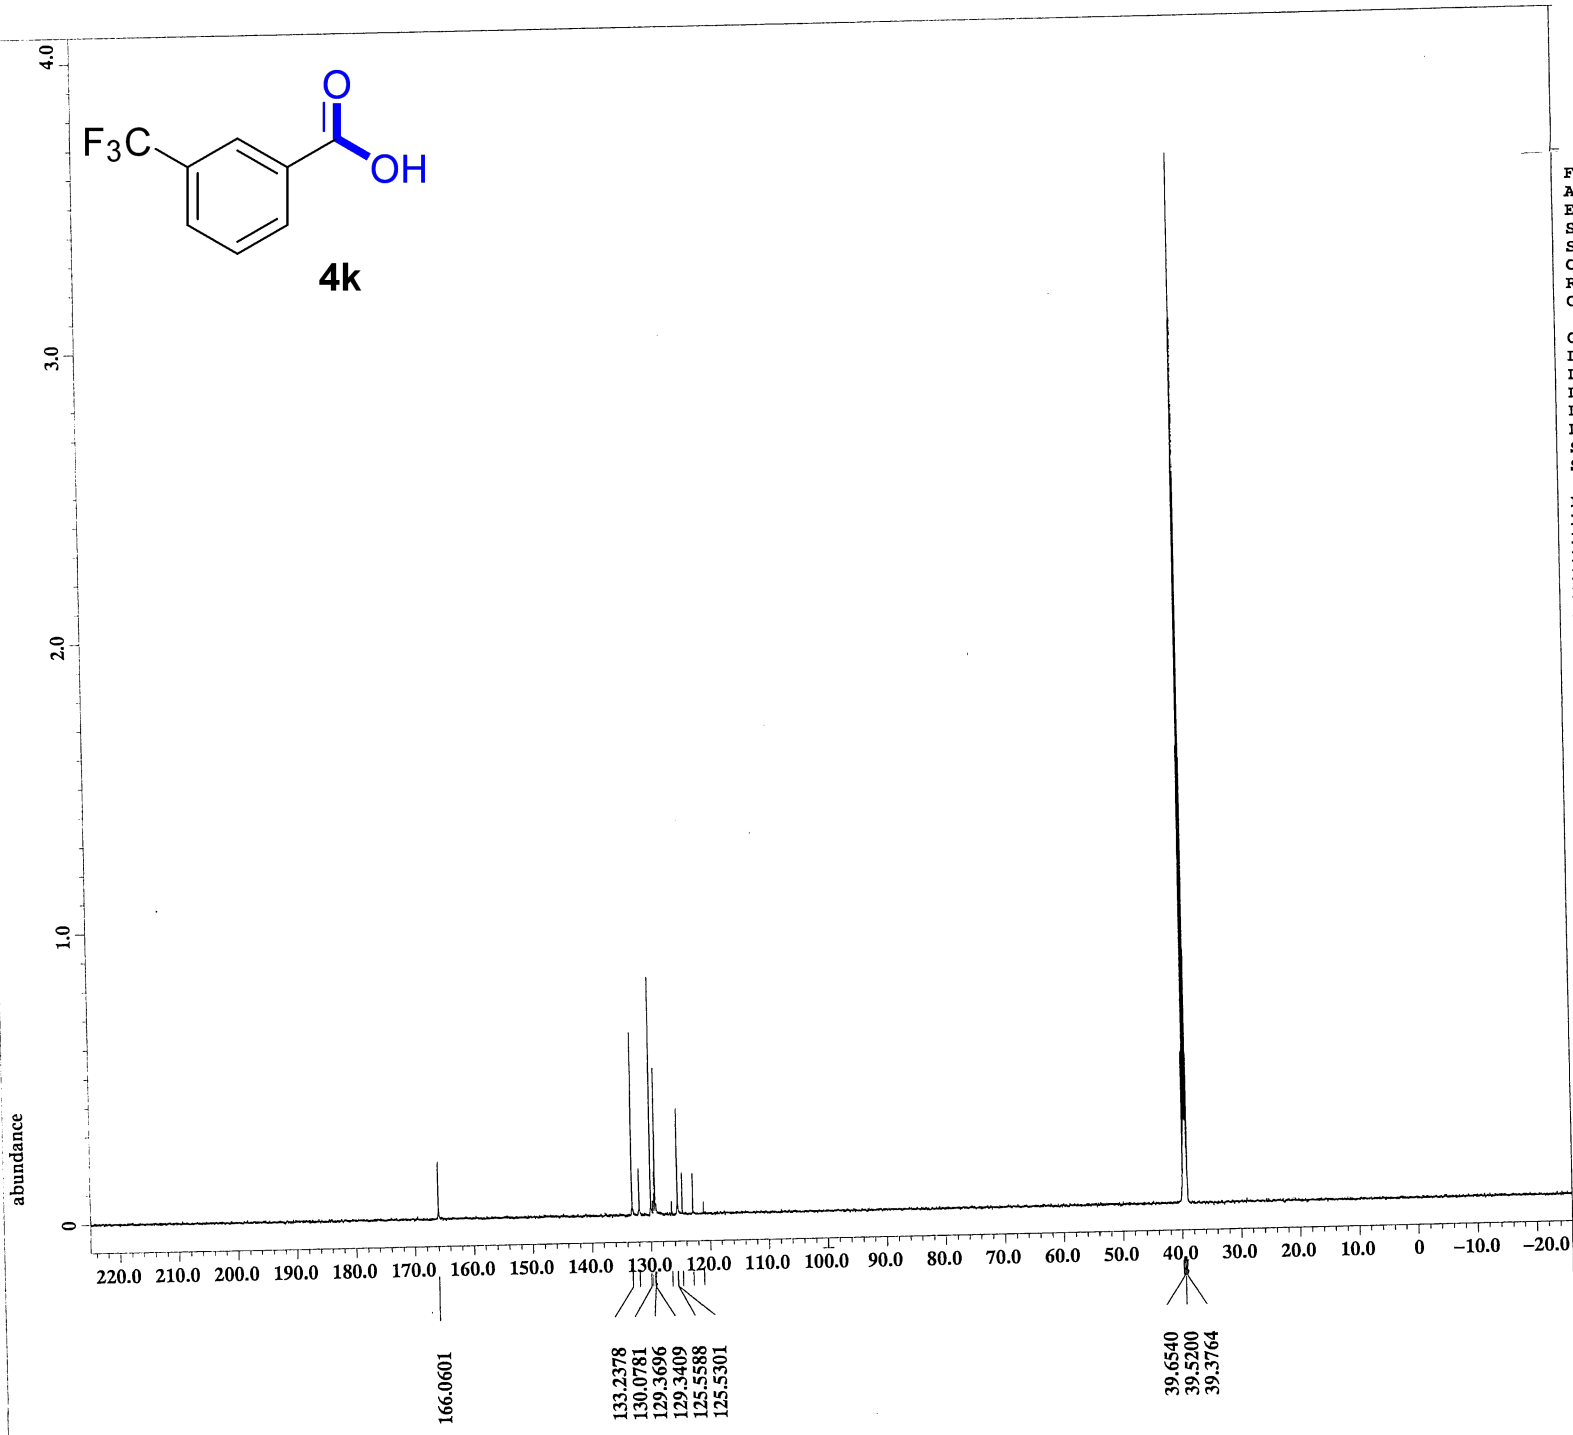

```

Filename      = Exp-R-124-22a-C-3.jdf
Author       = delta
Experiment   = single_pulse_dec
Sample_id    = Exp-R-124-22a-C
Solvent      = DMSO-D6
Creation_time = 23-AUG-2018 19:04:17
Revision_time = 23-AUG-2018 19:09:20
Current_time  = 23-AUG-2018 19:09:57

Content      = Exp-R-124-22a-C
Data_format  = 1D COMPLEX
Dim_size     = 26214
Dim_title    = 13C
Dim_units    = [ppm]
Dimensions   = X
Site         = ECA 600
Spectrometer = DELTA2_NMR

Field_strength = 14.09636928[T] (600[M]
X_acq_duration = 0.69206016[s]
X_domain       = 13C
X_freq         = 150.91343039[MHz]
X_offset       = 100[ppm]
X_points       = 32768
X_prescans     = 4
X_resolution   = 1.44496109[Hz]
X_sweep        = 47.34848485[kHz]
Irr_domain     = 1H
Irr_freq       = 600.1723046[MHz]
Irr_offset     = 5[ppm]
Clipped        = TRUE
Mod_return     = 1
Scans          = 682
Total_scans    = 682

X_90_width    = 12[us]
X_acq_time     = 0.69206016[s]
X_angle        = 30[deg]
X_atn          = 7.5[dB]
X_pulse        = 4[us]
Irr_atn_dec    = 18.95[dB]
Irr_atn_noe    = 18.95[dB]
Irr_noise      = WALTZ
Decoupling     = TRUE
Initial_wait   = 1[s]
Noe            = TRUE
Noe_time       = 2.5[s]
Recvr_gain     = 60
Relaxation_delay = 2.5[s]
Repetition_time = 3.19206016[s]
Temp_get       = 22[degC]

```

X : parts per Million : 13C

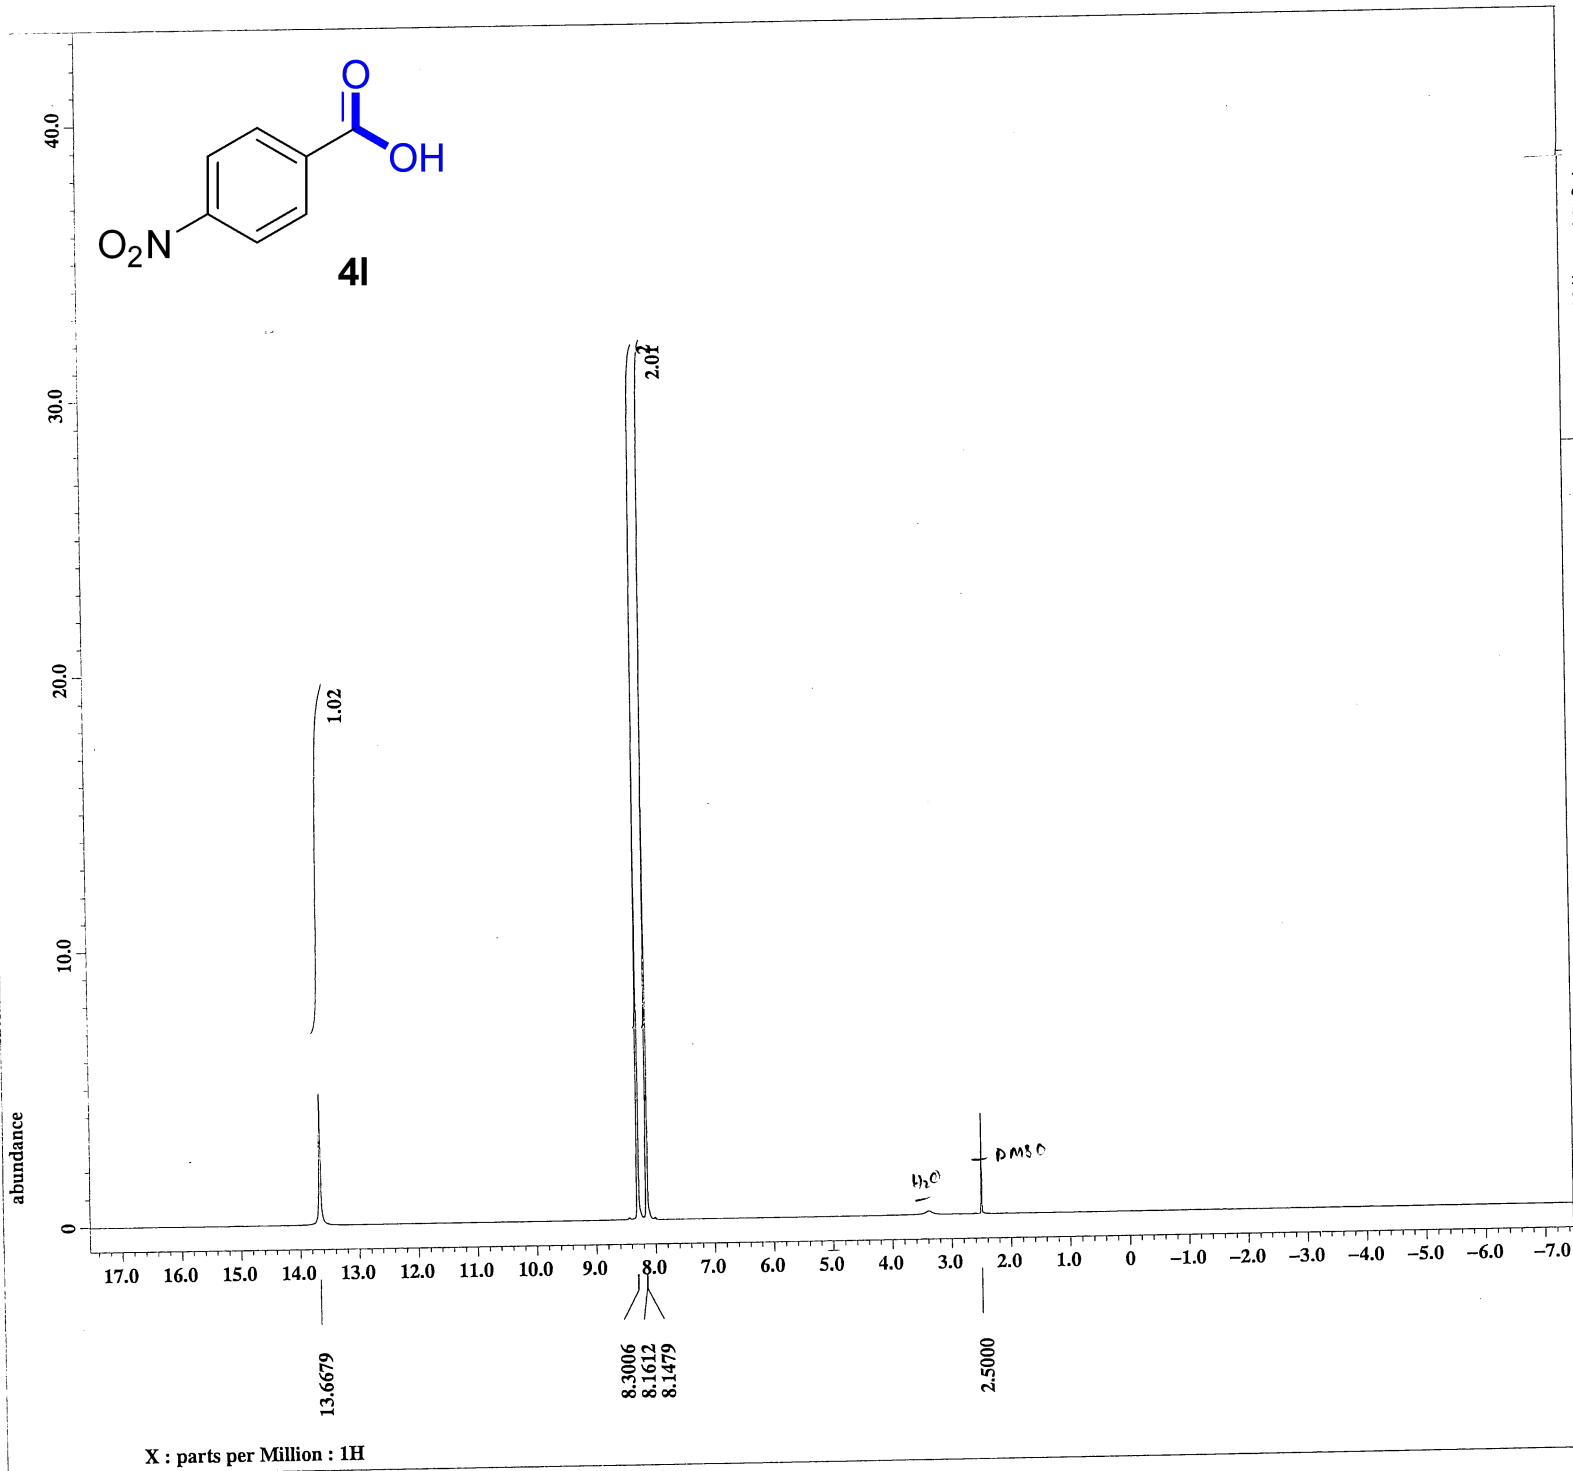

----- PROCESSING PARAMETERS -----  
 dc\_balance : 0 : FALSE  
 sexp : 0.2[Hz] : 0.0[s]  
 trapezoid3 : 0[%] : 80[%] : 100[%]  
 zerofill : 1  
 fft : 1 : TRUE : TRUE  
 machinephase  
 ppm

Derived from: Exp-R-184-1a-P-2.jdf

Filename = Exp-R-184-1a-P-5.jdf  
 Author = delta  
 Experiment = single\_pulse.ex2  
 Sample\_id = Exp-R-184-1a-P  
 Solvent = DMSO-D6  
 Creation\_time = 18-APR-2019 15:59:18  
 Revision\_time = 18-APR-2019 16:05:31  
 Current\_time = 18-APR-2019 16:05:35

Comment = Exp-R-184-1a-P  
 Data\_format = 1D COMPLEX  
 Dim\_size = 13107  
 Dim\_title = 1H  
 Dim\_units = [ppm]  
 Dimensions = X  
 Site = ECA 600  
 Spectrometer = DELTA2\_NMR

Field\_strength = 14.09636928[T] (600[M]  
 X\_acq\_duration = 0.87293952[s]  
 X\_domain = 1H  
 X\_freq = 600.1723046[MHz]  
 X\_offset = 5[ppm]  
 X\_points = 16384  
 X\_prescans = 1  
 X\_resolution = 1.14555473[Hz]  
 X\_sweep = 18.76876877[kHz]  
 Irr\_domain = 1H  
 Irr\_freq = 600.1723046[MHz]  
 Irr\_offset = 5[ppm]  
 Tri\_domain = 1H  
 Tri\_freq = 600.1723046[MHz]  
 Tri\_offset = 5[ppm]  
 Clipped = FALSE  
 Mod\_return = 1  
 Scans = 8  
 Total\_scans = 8

X\_90\_width = 13.17[us]  
 X\_acq\_time = 0.87293952[s]  
 X\_angle = 45[deg]  
 X\_atn = 3.4[dB]  
 X\_pulse = 6.585[us]  
 Irr\_mode = Off  
 Tri\_mode = Off  
 Dante\_presat = FALSE  
 Initial\_wait = 1[s]  
 Recvr\_gain = 48  
 Relaxation\_delay = 5[s]  
 Repetition\_time = 5.87293952[s]  
 Temp\_get = 20.9[dC]

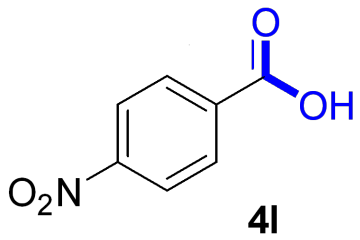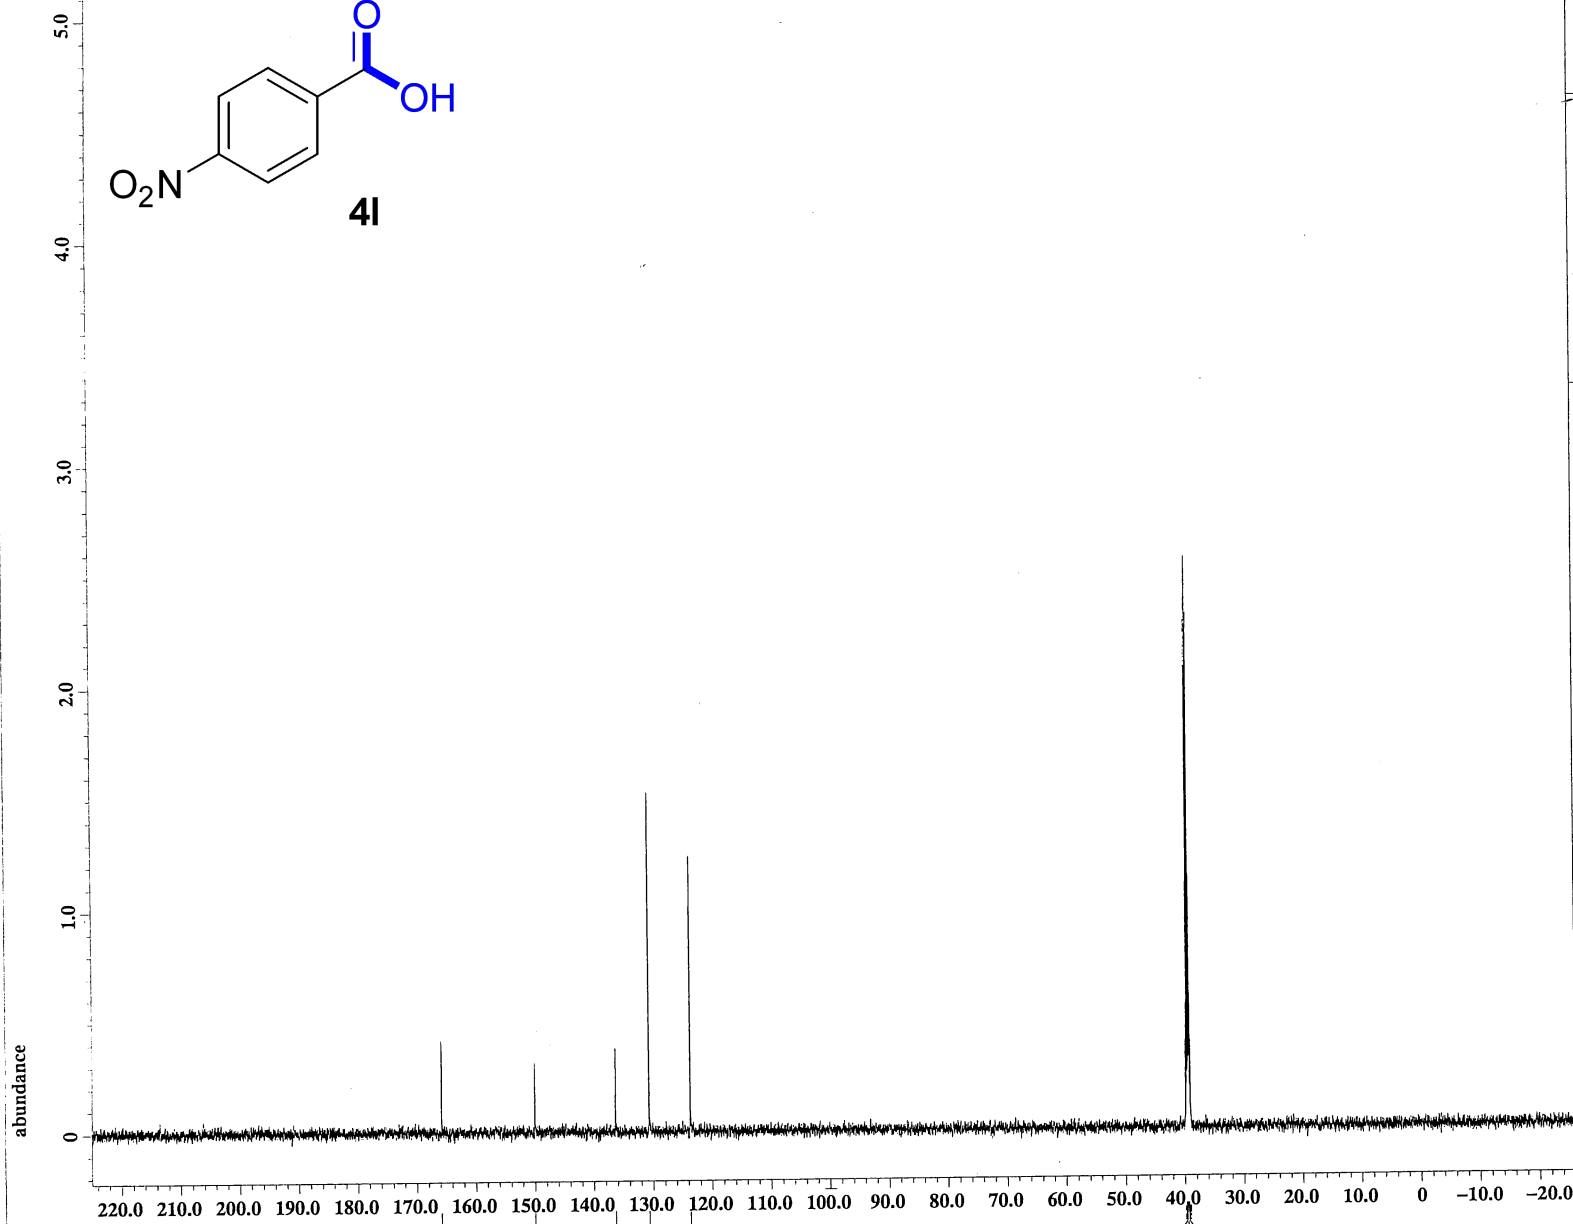

----- PROCESSING PARAMETERS -----  
 dc\_balance : 0 : FALSE  
 sexp : 2.0[Hz] : 0.0[s]  
 trapezoid3 : 0[%] : 80[%] : 100[%]  
 zerofill : 1  
 fft : 1 : TRUE : TRUE  
 machinephase  
 ppm  
 Derived from: Exp-R-184-1a-C-2.jdf

```

Filename      = Exp-R-184-1a-C-4.jdf
Author       = delta
Experiment   = single_pulse_dec
Sample_id    = Exp-R-184-1a-C
Solvent      = DMSO-D6
Creation_time = 18-APR-2019 16:01:35
Revision_time = 18-APR-2019 16:14:51
Current_time = 18-APR-2019 16:14:59

Comment      = Exp-R-184-1a-C
Data_format  = 1D COMPLEX
Dim_size     = 26214
Dim_title    = 13C
Dim_units    = [ppm]
Dimensions   = X
Site         = ECA 600
Spectrometer = DELTA2_NMR

Field_strength = 14.09636928[T] (600[M]
X_acq_duration = 0.69206016[s]
X_domain       = 13C
X_freq         = 150.91343039[MHz]
X_offset       = 100[ppm]
X_points       = 32768
X_prescans     = 4
X_resolution   = 1.44496109[Hz]
X_sweep        = 47.34848485[kHz]
Irr_domain     = 1H
Irr_freq       = 600.1723046[MHz]
Irr_offset     = 5[ppm]
Clipped        = FALSE
Mod_return     = 1
Scans          = 35
Total_scans    = 35

X_90_width    = 12.7[us]
X_acq_time     = 0.69206016[s]
X_angle        = 30[deg]
X_atn          = 7.5[db]
X_pulse        = 4.23333333[us]
Irr_atn_dec    = 18.62[db]
Irr_atn_noe    = 18.62[db]
Irr_noise      = WALTZ
Decoupling     = TRUE
Initial_wait   = 1[s]
Noe            = TRUE
Noe_time       = 2[s]
Recvr_gain     = 60
Relaxation_delay = 2[s]
Repetition_time = 2.69206016[s]
Temp_get       = 21.6[dc]
  
```

X : parts per Million : 13C

```

----- PROCESSING PARAMETERS -----
dc_balance : 0 : FALSE
sexp : 0.2[Hz] : 0.0[s]
trapezoid3 : 0[%] : 80[%] : 100[%]
zerofill : 1
fft : 1 : TRUE : TRUE
machinephase
ppm
Derived from: Exp-R-124-11-1-P-1.jdf

```

```

Filename      = Exp-R-124-11-1-P-4.jd
Author        = delta
Experiment    = single_pulse.ex2
Sample_id     = Exp-R-124-11-1-P
Solvent       = DMSO-D6
Creation_time = 12-DEC-2018 17:45:52
Revision_time = 12-DEC-2018 17:53:43
Current_time  = 12-DEC-2018 17:54:23

Comment       = Exp-R-124-11-1-P
Data_format   = 1D COMPLEX
Dim_size      = 13107
Dim_title     = 1H
Dim_units     = [ppm]
Dimensions    = X
Site          = ECA 600
Spectrometer  = DELTA2_NMR

Field_strength = 14.09636928[T] (600[M]
X_acq_duration = 0.87293952[s]
X_domain       = 1H
X_freq        = 600.1723046 [MHz]
X_offset      = 5 [ppm]
X_points      = 16384
X_prescans    = 1
X_resolution  = 1.14555473 [Hz]
X_sweep       = 18.76876877 [kHz]
Irr_domain    = 1H
Irr_freq      = 600.1723046 [MHz]
Irr_offset    = 5 [ppm]
Tri_domain    = 1H
Tri_freq      = 600.1723046 [MHz]
Tri_offset    = 5 [ppm]
Clipped       = FALSE
Mod_return    = 1
Scans         = 8
Total_scans   = 8

X_90_width    = 13.17 [us]
X_acq_time     = 0.87293952 [s]
X_angle       = 45 [deg]
X_atn         = 3.4 [dB]
X_atn         = 6.585 [us]
X_pulse       = Off
Irr_mode      = Off
Tri_mode      = Off
Dante_preset  = FALSE
Initial_wait  = 1 [s]
Recvr_gain    = 44
Relaxation_delay = 5 [s]
Repetition_time = 5.87293952 [s]
Temp_get      = 20.9 [dc]

```

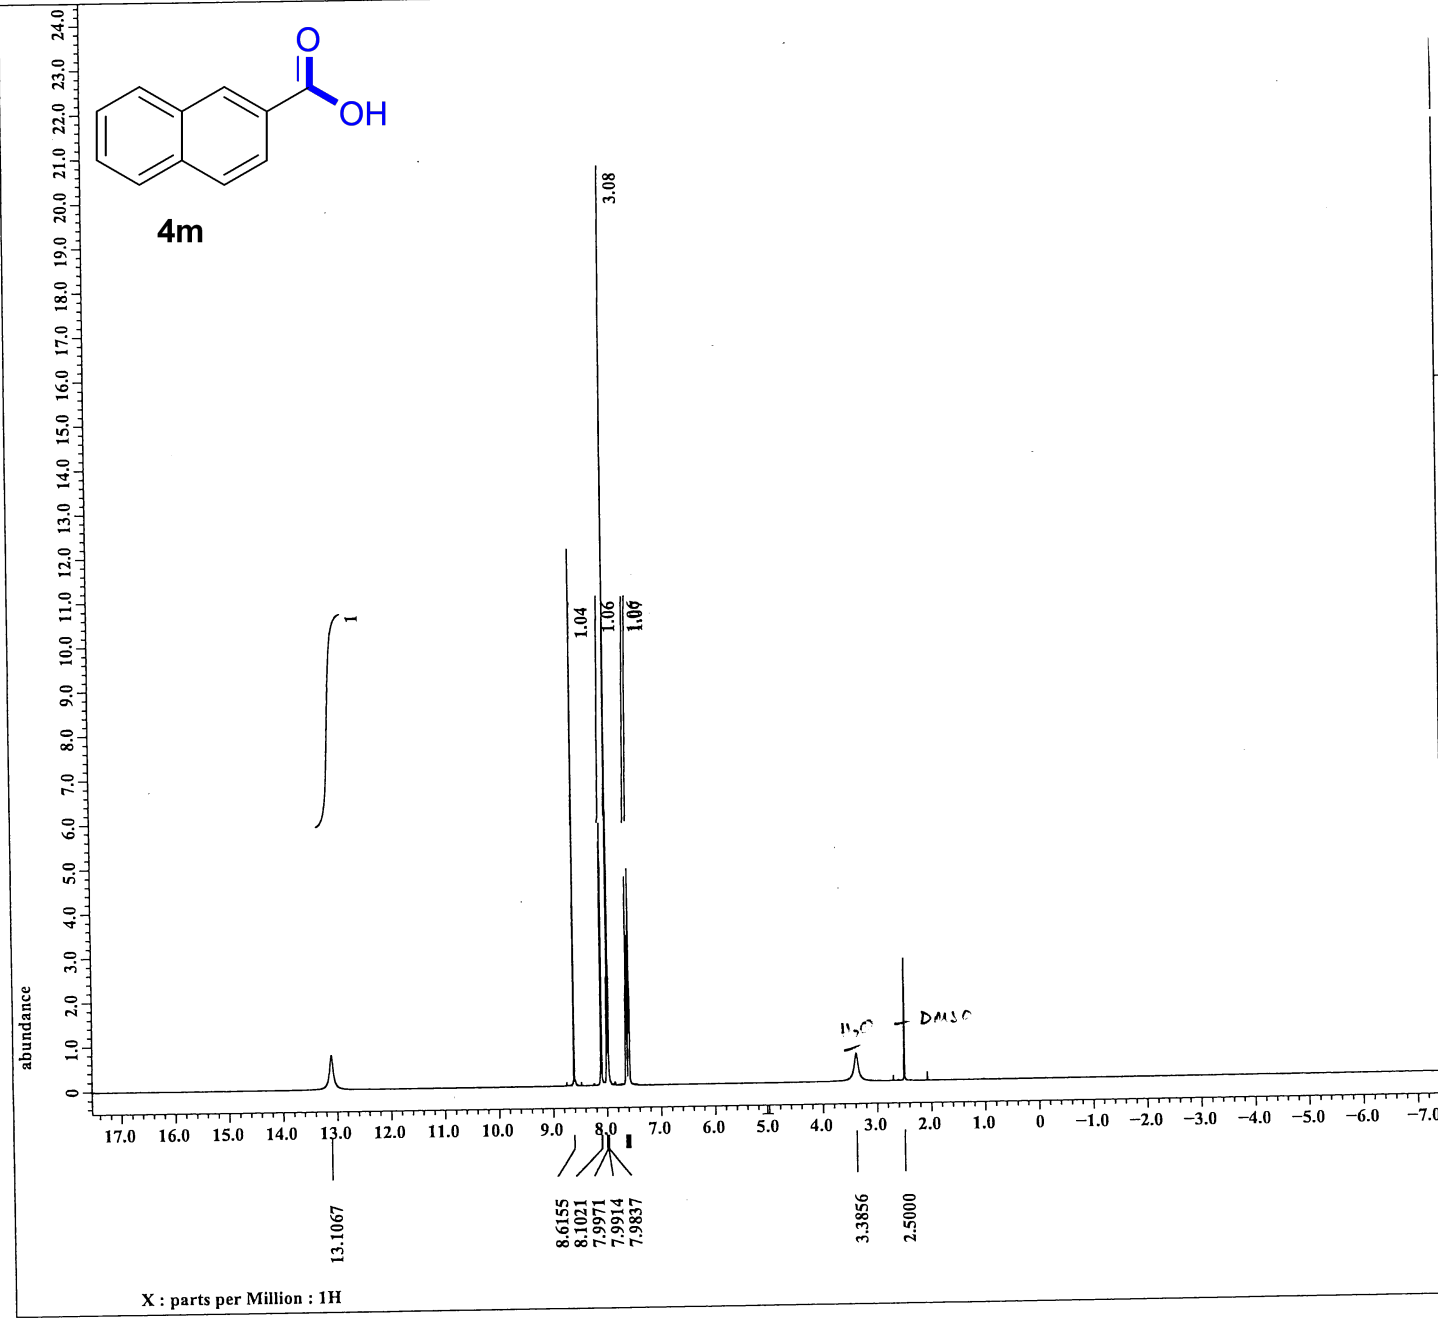



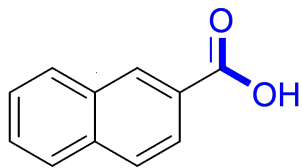

4m

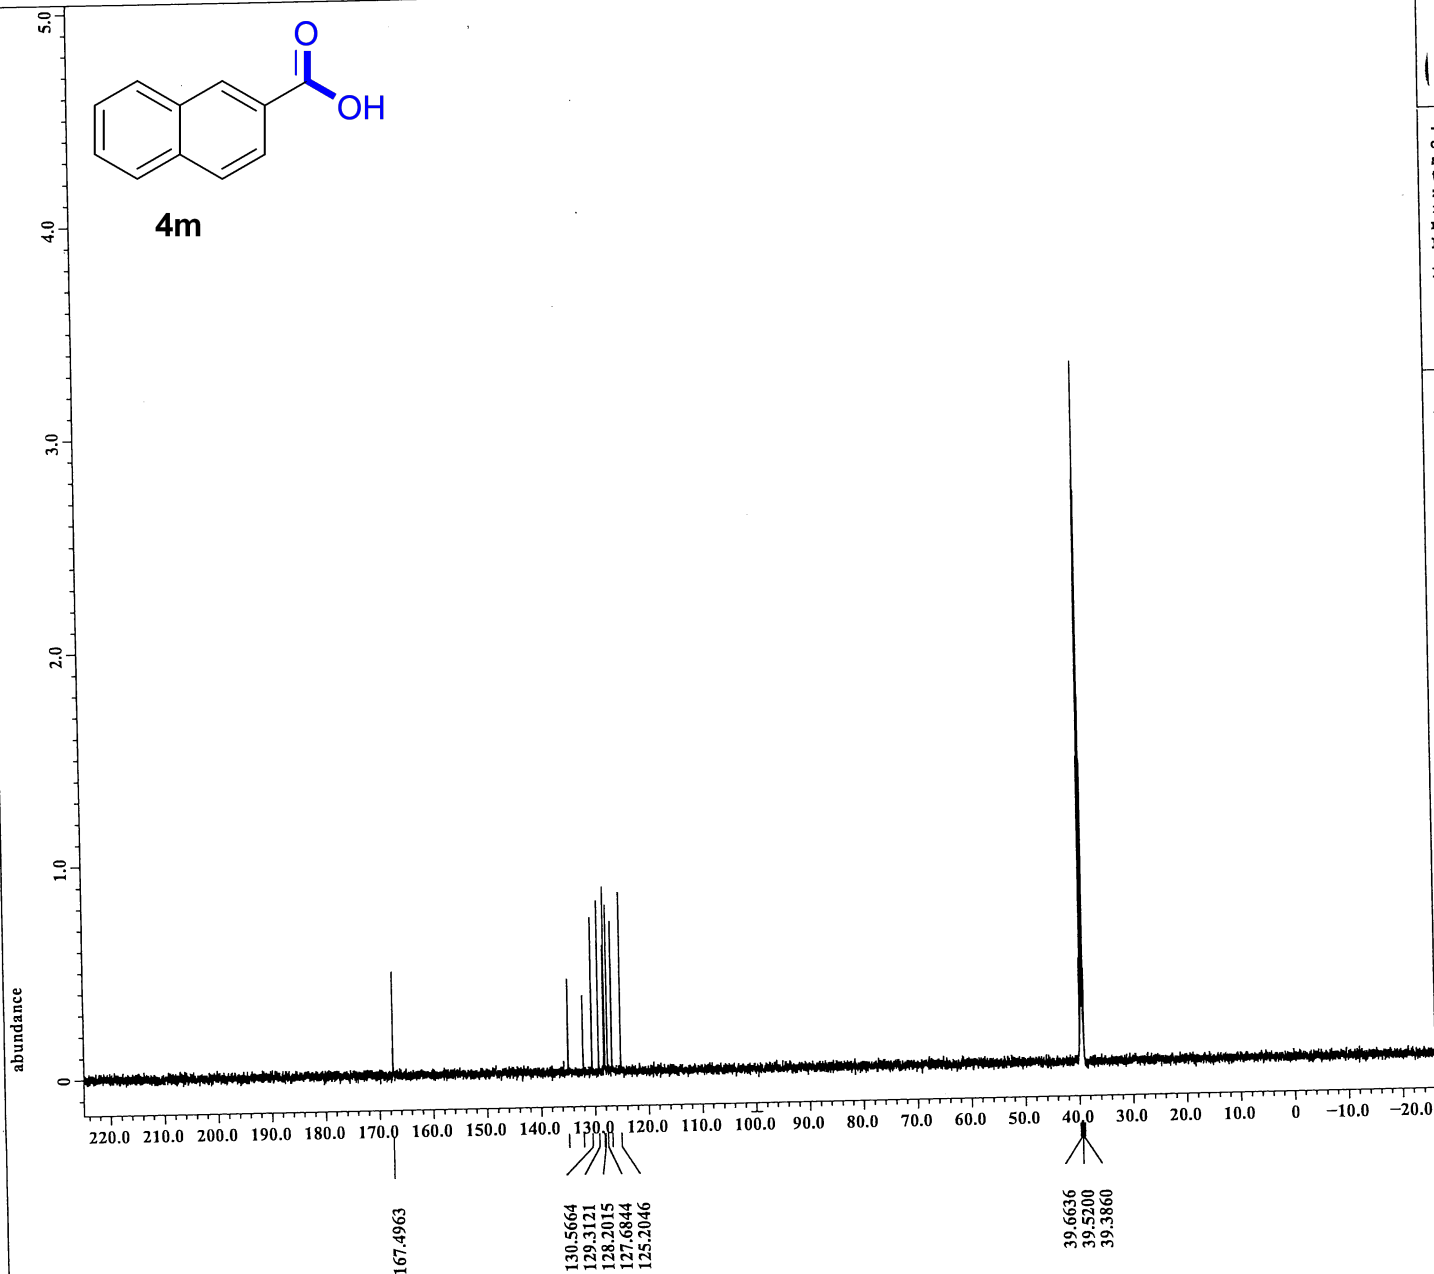

X : parts per Million : 13C

---- PROCESSING PARAMETERS ----

dc balance : 0 : FALSE  
 sexp : 2.0 [Hz] : 0.0 [s]  
 trapezoid3 : 0 [%] : 80 [%] : 100 [%]  
 zerofill : 1  
 fft : 1 : TRUE : TRUE  
 machinephase  
 ppm

Derived from: Exp-R-124-11-1-C-1.jdf

Filename = Exp-R-124-11-1-C-3.jd  
 Author = delta  
 Experiment = single\_pulse\_dec  
 Sample\_id = Exp-R-124-11-1-C  
 Solvent = DMSO-D6  
 Creation\_time = 12-DEC-2018 17:49:11  
 Revision\_time = 12-DEC-2018 17:55:43  
 Current\_time = 12-DEC-2018 17:56:13

Comment = Exp-R-124-11-1-C  
 Data\_format = 1D\_COMPLEX  
 Dim\_size = 26214  
 Dim\_title = 13C  
 Dim\_units = [ppm]  
 Dimensions = X  
 Site = ECA 600  
 Spectrometer = DELTA2\_NMR

Field\_strength = 14.09636928 [T] (600 [M])  
 X\_acq\_duration = 0.69206016 [s]  
 X\_domain = 13C  
 X\_freq = 150.91343039 [MHz]  
 X\_offset = 100 [ppm]  
 X\_points = 32768  
 X\_prescans = 4  
 X\_resolution = 1.44496109 [Hz]  
 X\_sweep = 47.34848485 [kHz]  
 Irr\_domain = 1H  
 Irr\_freq = 600.1723046 [MHz]  
 Irr\_offset = 5 [ppm]  
 Clipped = FALSE  
 Mod\_return = 1  
 Scans = 58  
 Total\_scans = 58

X\_90\_width = 12.7 [us]  
 X\_acq\_time = 0.69206016 [s]  
 X\_angle = 30 [deg]  
 X\_atn = 7.5 [dB]  
 X\_pulse = 4.23333333 [us]  
 Irr\_atn\_dec = 18.62 [dB]  
 Irr\_atn\_noe = 18.62 [dB]  
 Irr\_noise = WAITZ  
 Decoupling = TRUE  
 Initial\_wait = 1 [s]  
 Noe = TRUE  
 Noe\_time = 2 [s]  
 Recvr\_gain = 60  
 Relaxation\_delay = 2 [s]  
 Repetition\_time = 2.69206016 [s]  
 Temp\_get = 21.7 [dC]

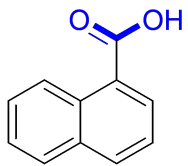

4n

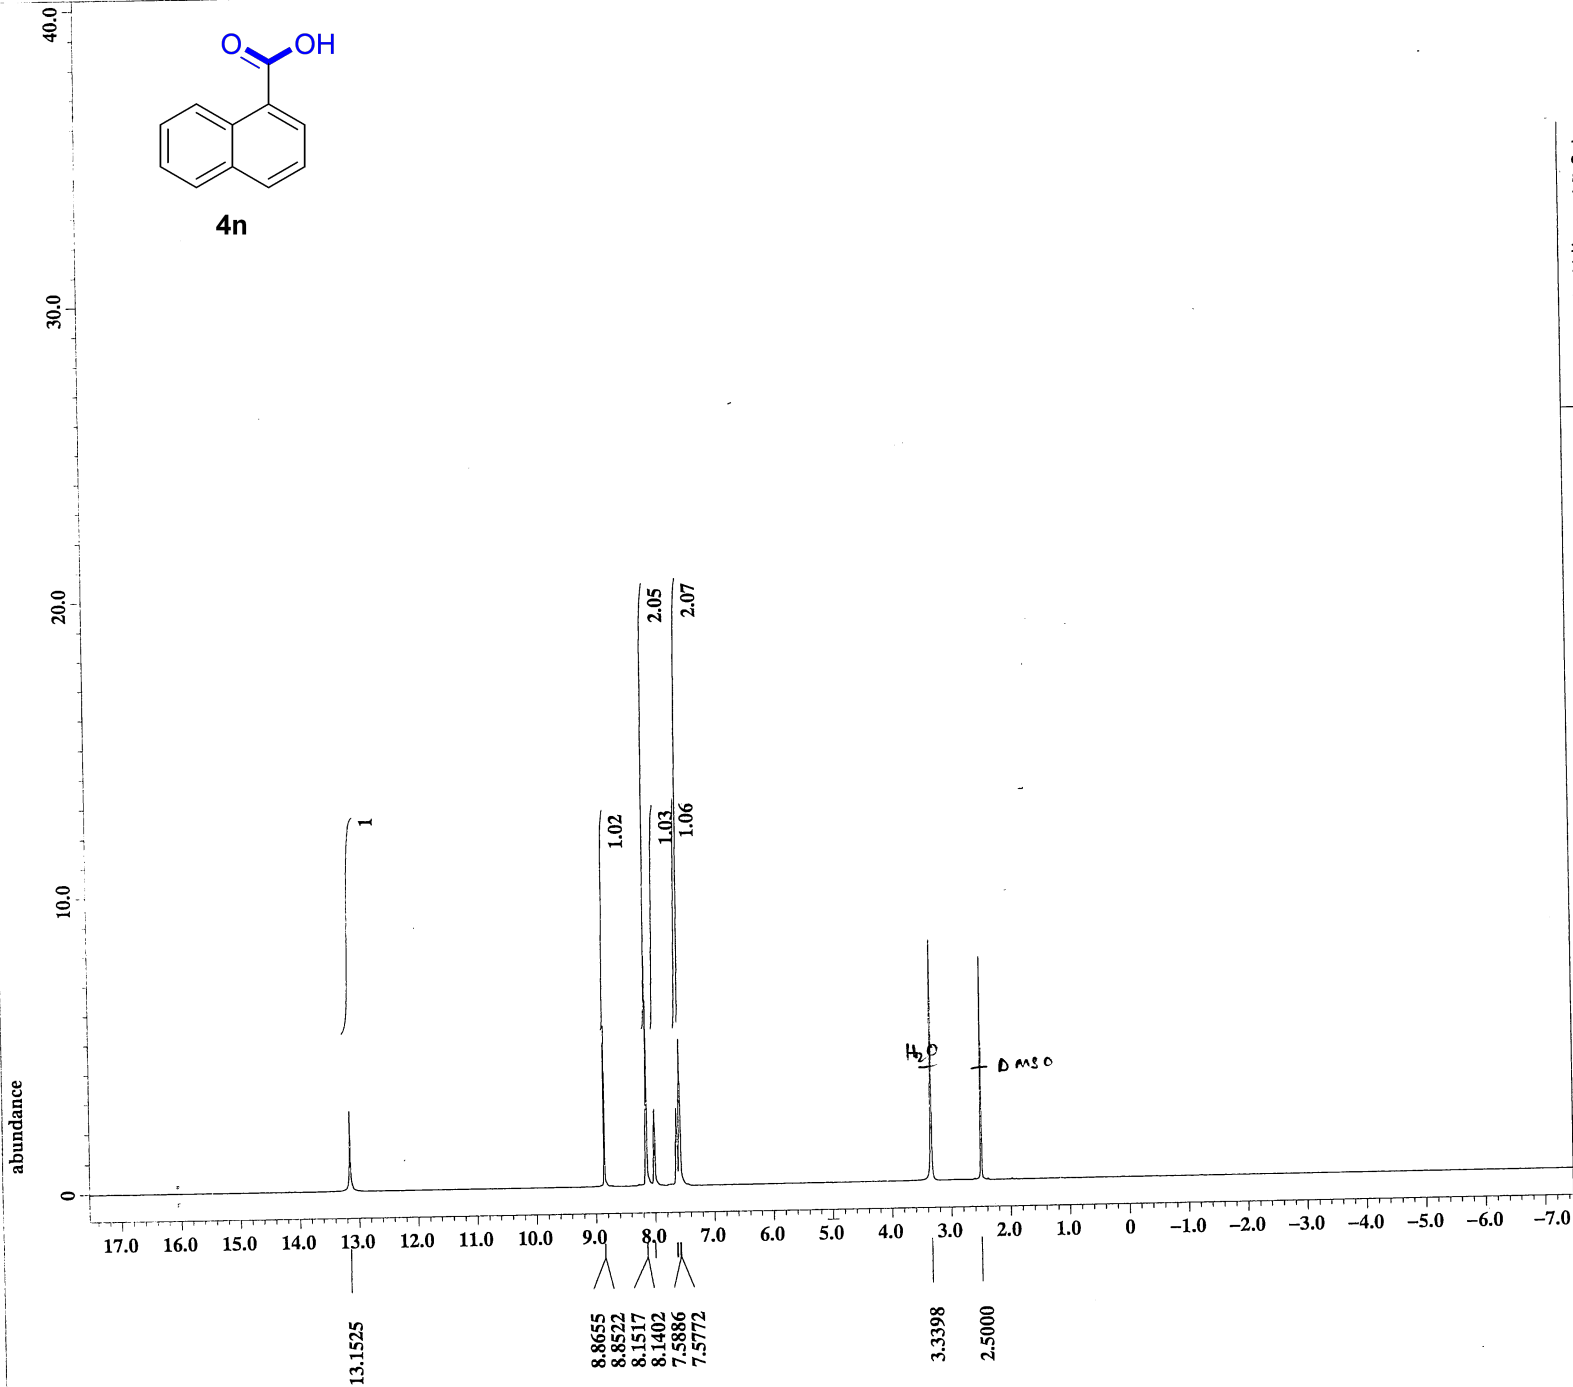

X : parts per Million : 1H

---- PROCESSING PARAMETERS ----  
 dc\_balance : 0 : FALSE  
 sexp : 0.2[Hz] : 0.0[s]  
 trapezoid3 : 0[%] : 80[%] : 100[%]  
 zerofill : 1  
 fft : 1 : TRUE : TRUE  
 machinephase  
 ppm

Derived from: Exp-R-184-6-P-1.jdf

Filename = Exp-R-184-6-P-4.jdf  
 Author = delta  
 Experiment = single\_pulse.ex2  
 Sample\_id = Exp-R-184-6-P  
 Solvent = DMSO-D6  
 Creation\_time = 18-APR-2019 16:52:20  
 Revision\_time = 18-APR-2019 16:59:24  
 Current\_time = 18-APR-2019 16:59:28

Comment = Exp-R-184-6-P  
 Data\_format = 1D COMPLEX  
 Dim\_size = 13107  
 Dim\_title = 1H  
 Dim\_units = [ppm]  
 Dimensions = X  
 Site = ECA 600  
 Spectrometer = DELTA2\_NMR

Field\_strength = 14.09636928[T] (600[M]  
 X\_acq\_duration = 0.87293952[s]  
 X\_domain = 1H  
 X\_freq = 600.1723046[MHz]  
 X\_offset = 5[ppm]  
 X\_points = 16384  
 X\_prescans = 1  
 X\_resolution = 1.14555473[Hz]  
 X\_sweep = 18.76876877[kHz]  
 Irr\_domain = 1H  
 Irr\_freq = 600.1723046[MHz]  
 Irr\_offset = 5[ppm]  
 Tri\_domain = 1H  
 Tri\_freq = 600.1723046[MHz]  
 Tri\_offset = 5[ppm]  
 Clipped = FALSE  
 Mod\_return = 1  
 Scans = 8  
 Total\_scans = 8

X\_90\_width = 13.17[us]  
 X\_acq\_time = 0.87293952[s]  
 X\_angle = 45[deg]  
 X\_atn = 3.4[dB]  
 X\_pulse = 6.585[us]  
 Irr\_mode = Off  
 Tri\_mode = Off  
 Dante\_presat = FALSE  
 Initial\_wait = 1[s]  
 Recvr\_gain = 56  
 Relaxation\_delay = 5[s]  
 Repetition\_time = 5.87293952[s]  
 Temp\_get = 21.4[dC]



4n

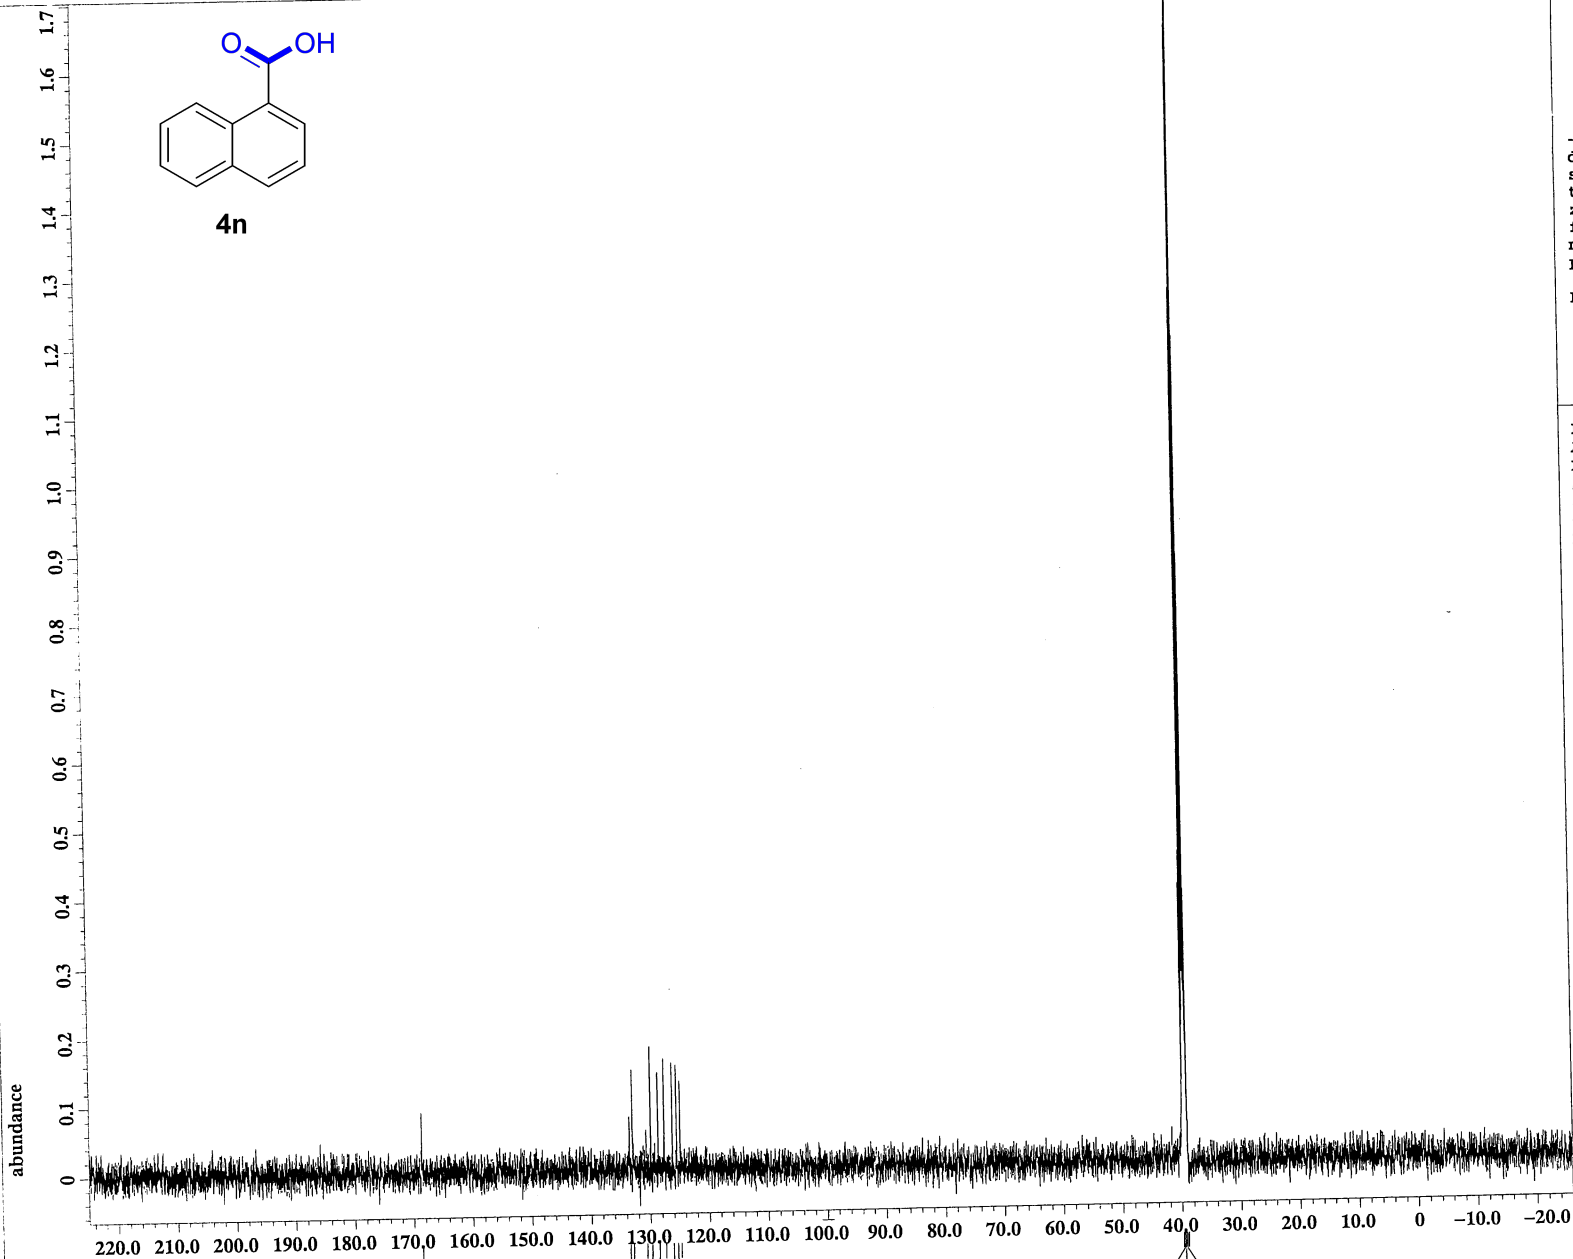

168.6644

132.9505  
129.8770  
128.6227  
126.2099  
125.4918

39.6540  
39.5200  
39.3764

X : parts per Million : 13C

```

---- PROCESSING PARAMETERS ----
dc_balance : 0 : FALSE
sexp : 2.0[Hz] : 0.0[s]
trapezoid3 : 0[%] : 80[%] : 100[%]
zerofill : 1
fft : 1 : TRUE : TRUE
machinephase
ppm

```

Derived from: Exp-R-184-6-C-1.jdf

```

Filename      = Exp-R-184-6-C-4.jdf
Author        = delta
Experiment    = single_pulse_dec
Sample_id     = Exp-R-184-6-C
Solvent       = DMSO-D6
Creation_time = 18-APR-2019 16:54:59
Revision_time = 18-APR-2019 17:02:58
Current_time  = 18-APR-2019 17:03:16

```

```

Comment       = Exp-R-184-6-C
Data_format   = 1D COMPLEX
Dim_size      = 26214
Dim_title     = 13C
Dim_units    = [ppm]
Dimensions    = X
Site          = ECA 600
Spectrometer  = DELTA2_NMR

```

```

Field_strength = 14.09636928[T] (600[M]
X_acq_duration = 0.69206016[s]
X_domain       = 13C
X_freq         = 150.91343039[MHz]
X_offset       = 100 [ppm]
X_points       = 32768
X_prescans     = 4
X_resolution   = 1.44496109[Hz]
X_sweep        = 47.34848485 [kHz]
Irr_domain     = 1H
Irr_freq       = 600.1723046[MHz]
Irr_offset     = 5 [ppm]
Clipped        = FALSE
Mod_return     = 1
Scans          = 43
Total_scans    = 43

```

```

X_90_width    = 12.7[us]
X_acq_time     = 0.69206016[s]
X_angle        = 30[deg]
X_atn          = 7.5[dB]
X_pulse        = 4.23333333[us]
Irr_atn_dec    = 18.62[dB]
Irr_atn_noe    = 18.62[dB]
Irr_noise      = WALTZ
Decoupling     = TRUE
Initial_wait   = 1[s]
Noe            = TRUE
Noe_time       = 2[s]
Recvr_gain     = 60
Relaxation_delay = 2[s]
Repetition_time = 2.69206016[s]
Temp_get       = 22[dc]

```

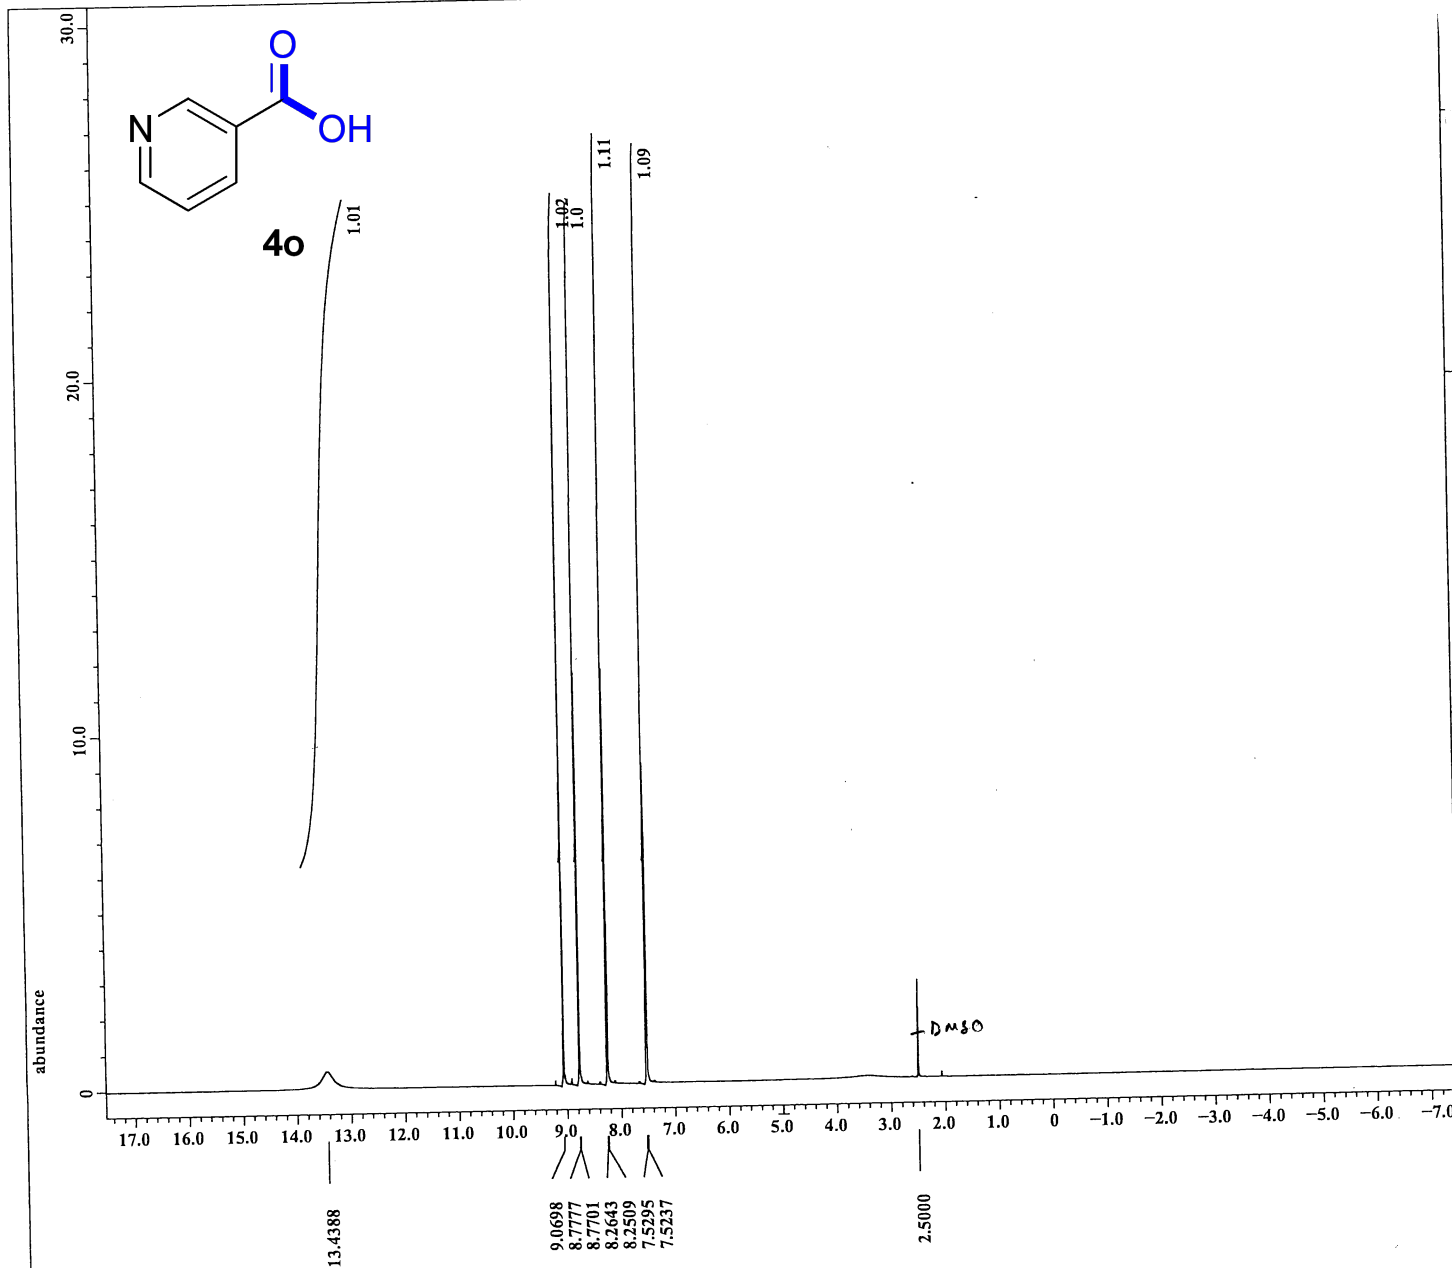

----- PROCESSING PARAMETERS -----  
 dc balance : 0 : FALSE  
 secp : 0.2 [Hz] : 0.0 [s]  
 trapezoid3 : 0 [%] : 80 [%] : 100 [%]  
 zerofill : 1  
 fft : 1 : TRUE : TRUE  
 machinephase  
 ppm

Derived from: Exp-R-124-21-1-P-1.jdf

Filename = Exp-R-124-21-1-P-4.jd  
 Author = delta  
 Experiment = single\_pulse.ex2  
 Sample\_id = Exp-R-124-21-1-P  
 Solvent = DMSO-D6  
 Creation\_time = 12-DEC-2018 18:09:11  
 Revision\_time = 12-DEC-2018 18:14:42  
 Current\_time = 12-DEC-2018 18:15:03

Comment = Exp-R-124-21-1-P  
 Data\_format = 1D COMPLEX  
 Dim\_size = 13107  
 Dim\_title = 1H  
 Dim\_units = [ppm]  
 Dimensions = X  
 Site = ECA 600  
 Spectrometer = DELTA2\_NMR

Field\_strength = 14.09636928 [T] (600 [M  
 X\_acq\_duration = 0.87293952 [s]  
 X\_domain = 1H  
 X\_freq = 600.1723046 [MHz]  
 X\_offset = 5 [ppm]  
 X\_points = 16384  
 X\_prescans = 1  
 X\_resolution = 1.14555473 [Hz]  
 X\_sweep = 18.76876877 [kHz]  
 Irr\_domain = 1H  
 Irr\_freq = 600.1723046 [MHz]  
 Irr\_offset = 5 [ppm]  
 Tri\_domain = 1H  
 Tri\_freq = 600.1723046 [MHz]  
 Tri\_offset = 5 [ppm]  
 Clipped = FALSE  
 Mod\_return = 1  
 Scans = 8  
 Total\_scans = 8

X\_90\_width = 13.17 [us]  
 X\_acq\_time = 0.87293952 [s]  
 X\_angle = 45 [deg]  
 X\_atn = 3.4 [dB]  
 X\_pulse = 6.585 [us]  
 Irr\_mode = Off  
 Tri\_mode = Off  
 Dante\_presat = FALSE  
 Initial\_wait = 1 [s]  
 Recvr\_gain = 44  
 Relaxation\_delay = 5 [s]  
 Repetition\_time = 5.87293952 [s]  
 Temp\_get = 21.2 [dc]

X : parts per Million : 1H

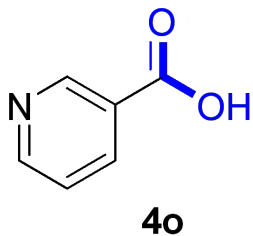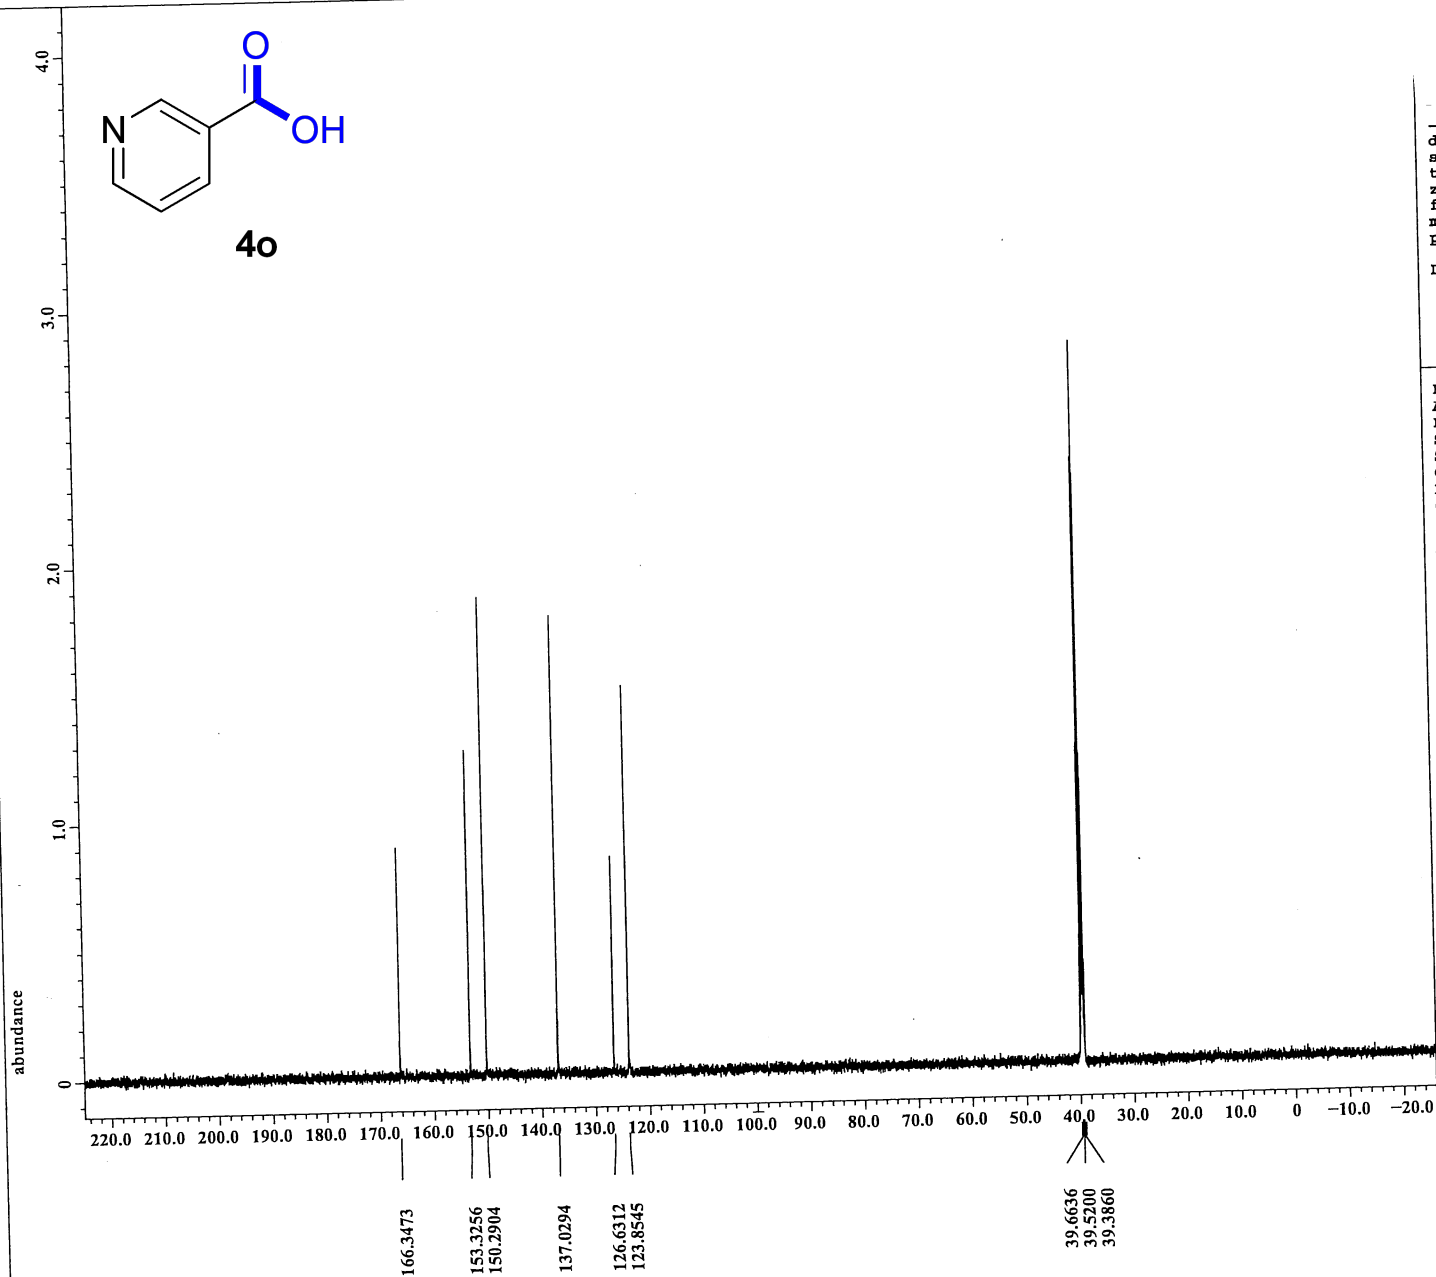

X : parts per Million : 13C

---- PROCESSING PARAMETERS ----  
 dc\_balance : 0 : FALSE  
 sexp : 2.0[Hz] : 0.0[s]  
 trapezoid3 : 0[%] : 80[%] : 100[%]  
 zerofill : 1  
 fft : 1 : TRUE : TRUE  
 machinephase  
 ppm

Derived from: Exp-R-124-21-1-C-1.jdf

Filename = Exp-R-124-21-1-C-3.jd  
 Author = delta  
 Experiment = single\_pulse\_dec  
 Sample\_id = Exp-R-124-21-1-C  
 Solvent = DMSO-D6  
 Creation\_time = 12-DEC-2018 18:13:21  
 Revision\_time = 12-DEC-2018 18:16:36  
 Current\_time = 12-DEC-2018 18:17:09

Comment = Exp-R-124-21-1-C  
 Data\_format = 1D COMPLEX  
 Dim\_size = 26214  
 Dim\_title = 13C  
 Dim\_units = [ppm]  
 Dimensions = X  
 Site = ECA 600  
 Spectrometer = DELTA2\_NMR

Field\_strength = 14.09636928 [T] (600 [M])  
 X\_acq\_duration = 0.69206016 [s]  
 X\_domain = 13C  
 X\_freq = 150.91343039 [MHz]  
 X\_offset = 100 [ppm]  
 X\_points = 32768  
 X\_prescans = 4  
 X\_resolution = 1.44496109 [Hz]  
 X\_sweep = 47.34848485 [kHz]  
 Irr\_domain = 1H  
 Irr\_freq = 600.1723046 [MHz]  
 Irr\_offset = 5 [ppm]  
 Clipped = FALSE  
 Mod\_return = 1  
 Scans = 77  
 Total\_scans = 77

X\_90\_width = 12.7 [us]  
 X\_acq\_time = 0.69206016 [s]  
 X\_angle = 30 [deg]  
 X\_atn = 7.5 [dB]  
 X\_pulse = 4.23333333 [us]  
 Irr\_atn\_dec = 18.62 [dB]  
 Irr\_atn\_noe = 18.62 [dB]  
 Irr\_noise = WALTZ  
 Decoupling = TRUE  
 Initial\_wait = 1 [s]  
 Noe = TRUE  
 Noe\_time = 2 [s]  
 Recvr\_gain = 60  
 Relaxation\_delay = 2 [s]  
 Repetition\_time = 2.69206016 [s]  
 Temp\_get = 21.5 [dC]

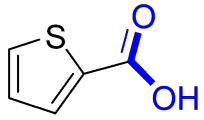

4p

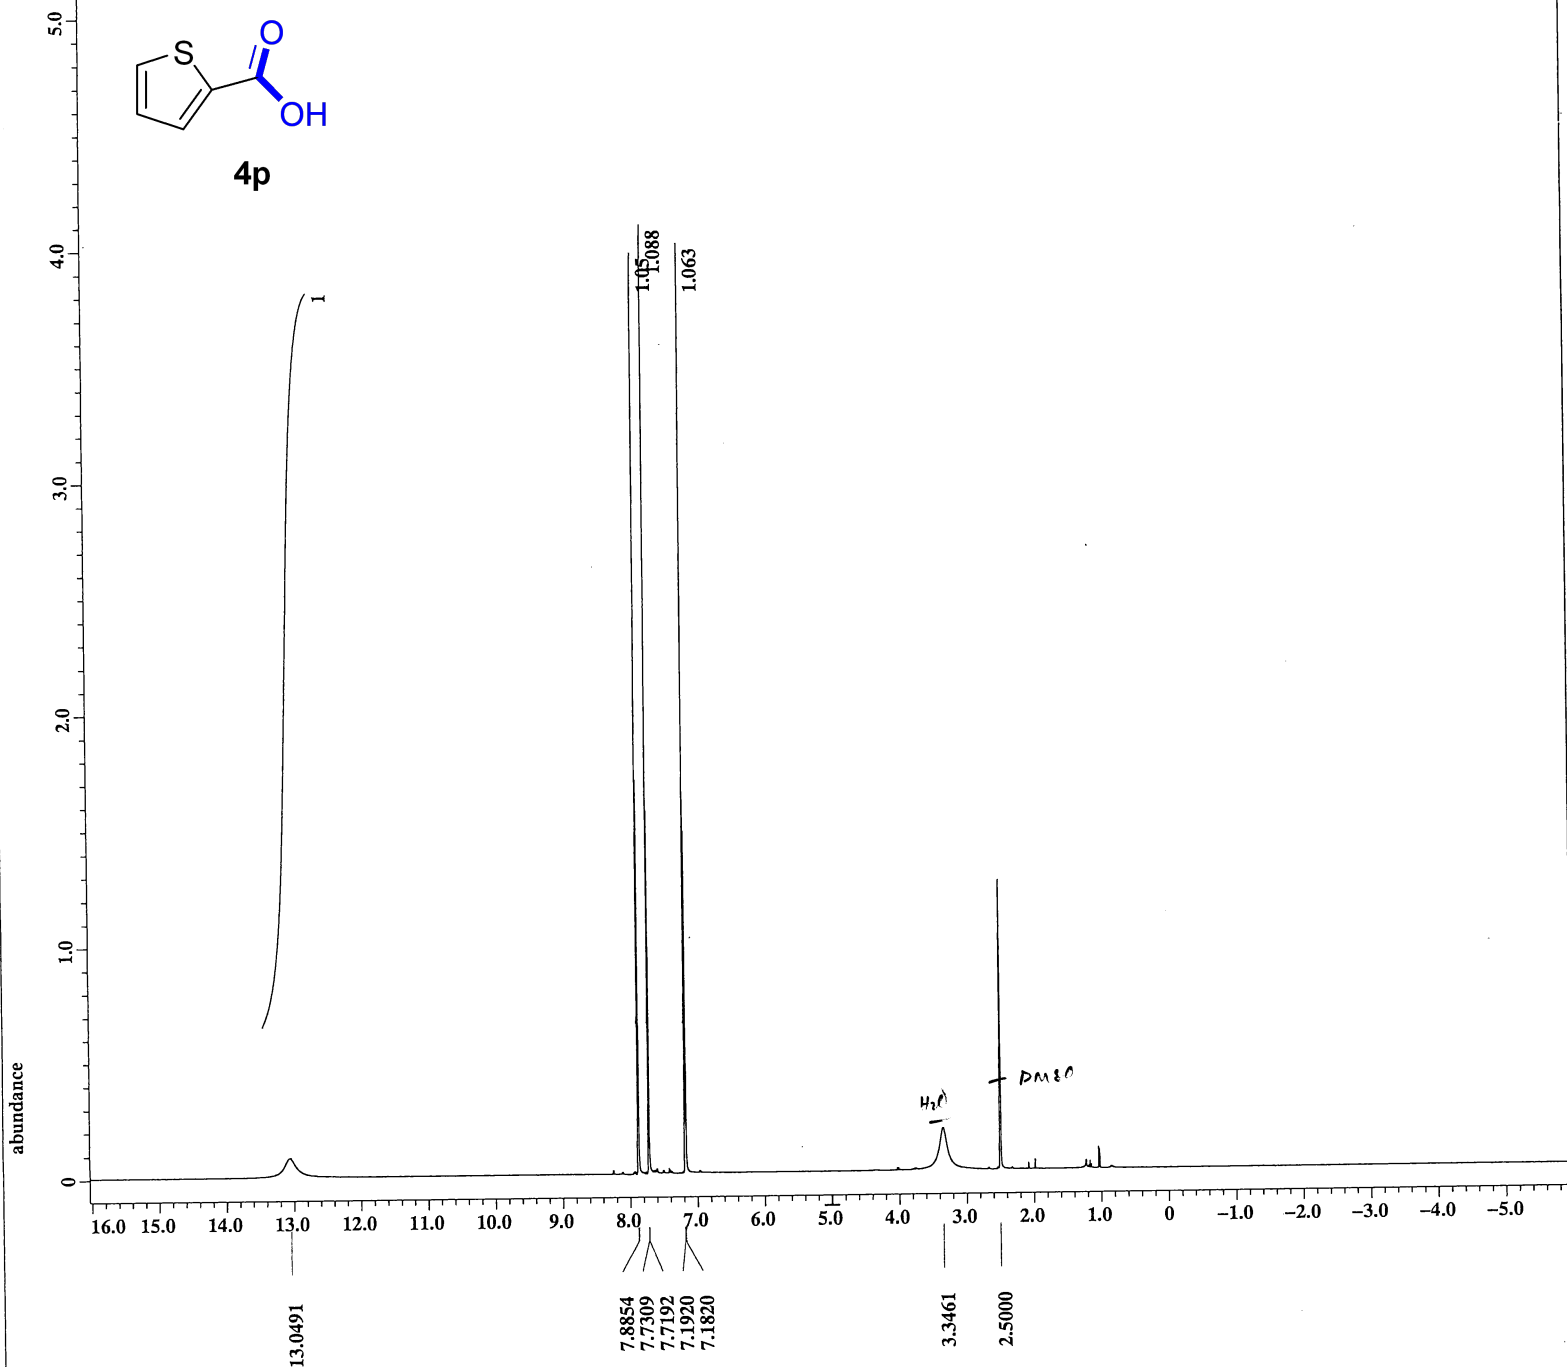

```

Filename      = R-120-7c-P-4.jdf
Author       = delta
Experiment   = single_pulse.ex2
Sample_id    = R-120-7c-P
Solvent      = DMSO-D6
Creation_time = 26-JUL-2018 16:16:18
Revision_time = 26-JUL-2018 17:03:55
Current_time  = 26-JUL-2018 17:04:00

Content      = R-120-7c-P
Data_format  = 1D COMPLEX
Dim_size     = 13107
Dim_title    = 1H
Dim_units    = [ppm]
Dimensions   = X
Site         = ECX 400
Spectrometer = DELTA2_NMR

Field_strength = 9.2982153[T] (400[MHz]
X_acq_duration = 1.50470656[s]
X_domain       = 1H
X_freq         = 395.88430144[MHz]
X_offset       = 5[ppm]
X_points       = 16384
X_prescans     = 1
X_resolution   = 0.66458141[Hz]
X_sweep        = 10.88850174[kHz]
Irr_domain     = 1H
Irr_freq       = 395.88430144[MHz]
Irr_offset     = 5[ppm]
Tri_domain     = 1H
Tri_freq       = 395.88430144[MHz]
Tri_offset     = 5[ppm]
Clipped        = FALSE
Mod_return     = 1
Scans          = 8
Total_scans    = 8

X_90_width    = 10.62[us]
X_acq_time     = 1.50470656[s]
X_angle        = 45[deg]
X_atn          = 9[db]
X_pulse        = 5.31[us]
Irr_mode       = Off
Tri_mode       = Off
Dante_preset  = FALSE
Initial_wait   = 1[s]
Recvr_gain     = 36
Relaxation_delay = 5[s]
Repetition_time = 6.50470656[s]
Temp_get       = 22.8[dC]
  
```

X : parts per Million : 1H

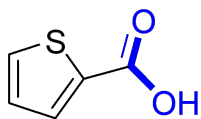

4p

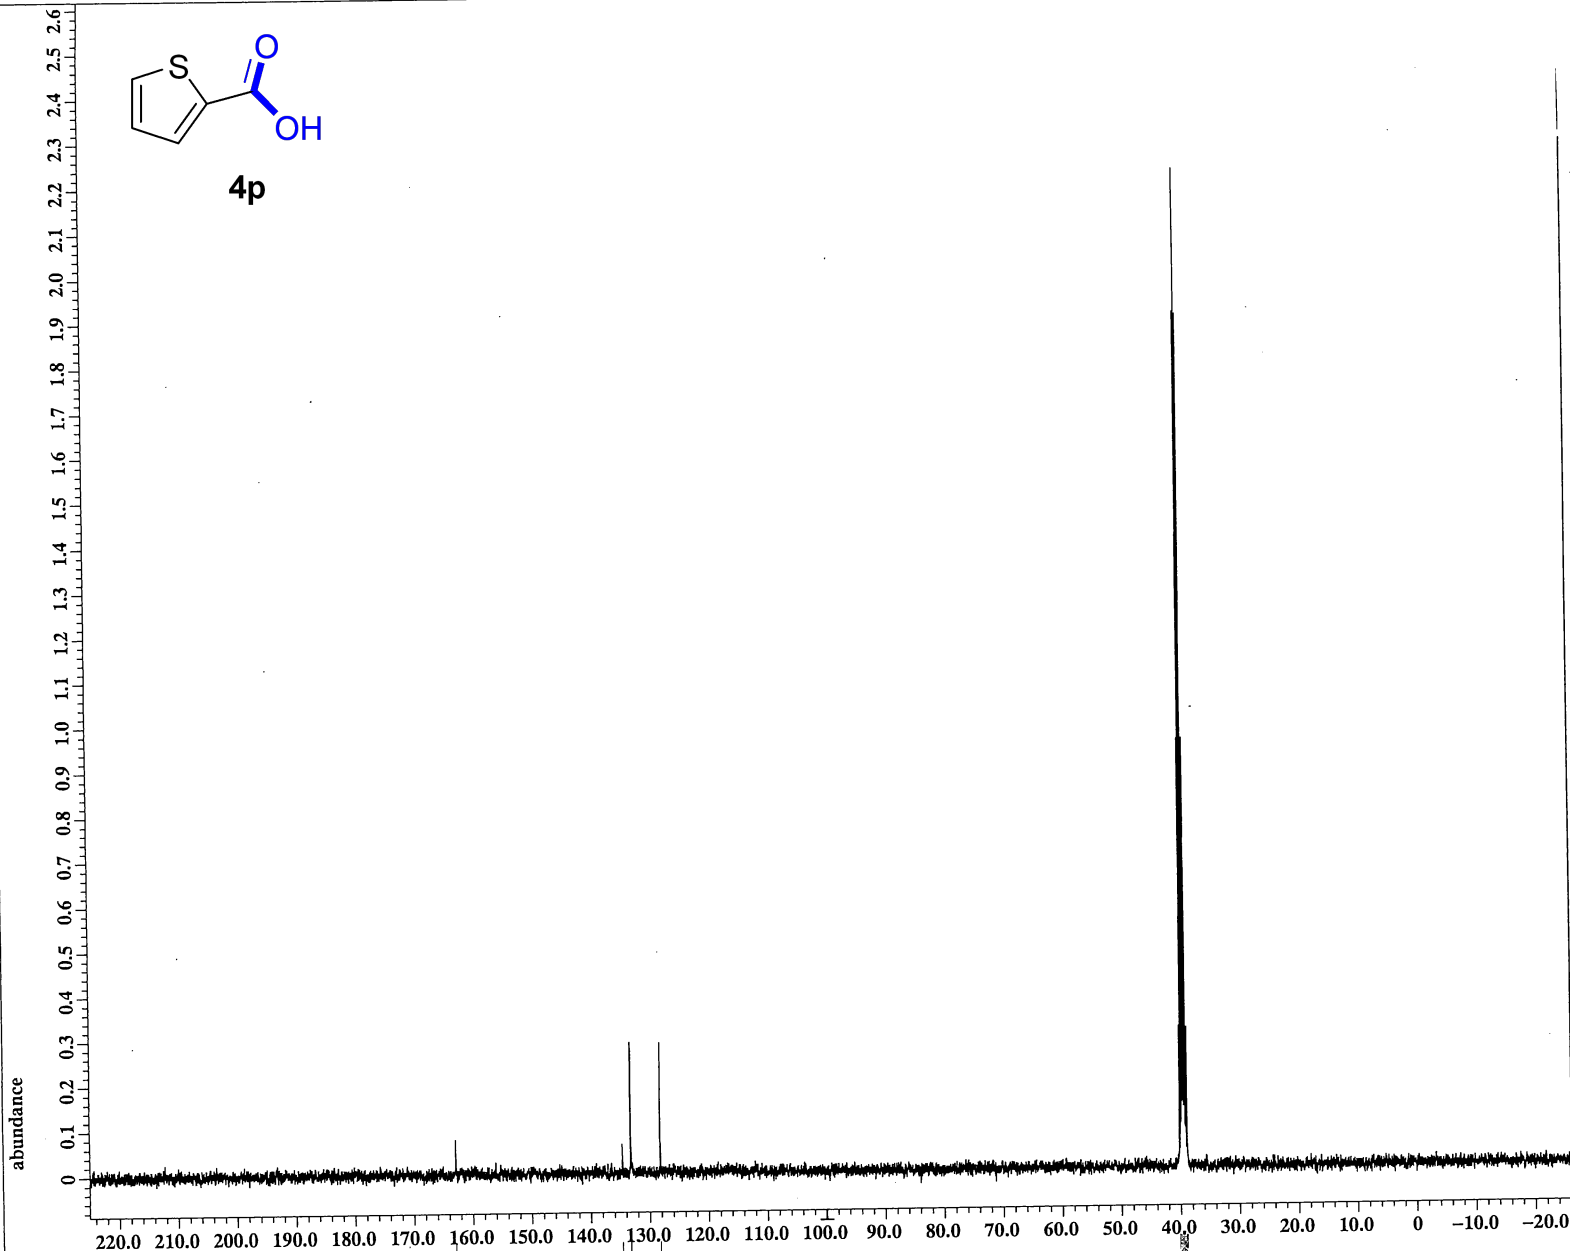

X : parts per Million : <sup>13</sup>C

```

Filename      = R-120-7c-C-3.jdf
Author       = delta
Experiment   = single_pulse_dec
Sample_id    = R-120-7c-C
Solvent      = DMSO-D6
Creation_time = 26-JUL-2018 16:23:12
Revision_time = 26-JUL-2018 17:05:59
Current_time  = 26-JUL-2018 17:06:14

Content       = R-120-7c-C
Data_format  = 1D_COMPLEX
Dim_size     = 26214
Dim_title    = 13C
Dim_units    = [ppm]
Dimensions   = X
Site         = ECX 400
Spectrometer = DELTA2_NMR

Field_strength = 9.2982153[T] (400[MHz])
X_acq_duration = 1.048576[s]
X_domain       = 13C
X_freq         = 99.54517646[MHz]
X_offset       = 100[ppm]
X_points       = 32768
X_prescans     = 4
X_resolution   = 0.95367432[Hz]
X_sweep        = 31.25[kHz]
Irr_domain    = 1H
Irr_freq      = 395.88430144[MHz]
Irr_offset    = 5[ppm]
Clipped       = FALSE
Mod_return    = 1
Scans         = 107
Total_scans   = 107

X_90_width    = 9.2[us]
X_acq_time    = 1.048576[s]
X_angle       = 30[deg]
X_atn         = 8.4[dB]
X_pulse       = 3.06666667[us]
Irr_atn_dec   = 29.69[dB]
Irr_atn_noe   = 29.69[dB]
Irr_noise     = WALTZ
Decoupling    = TRUE
Initial_wait  = 1[s]
Noe           = TRUE
Noe_time      = 2[s]
Recvr_gain    = 60
Relaxation_delay = 2[s]
Repetition_time = 3.048576[s]
Temp_get      = 23.1[dC]
  
```

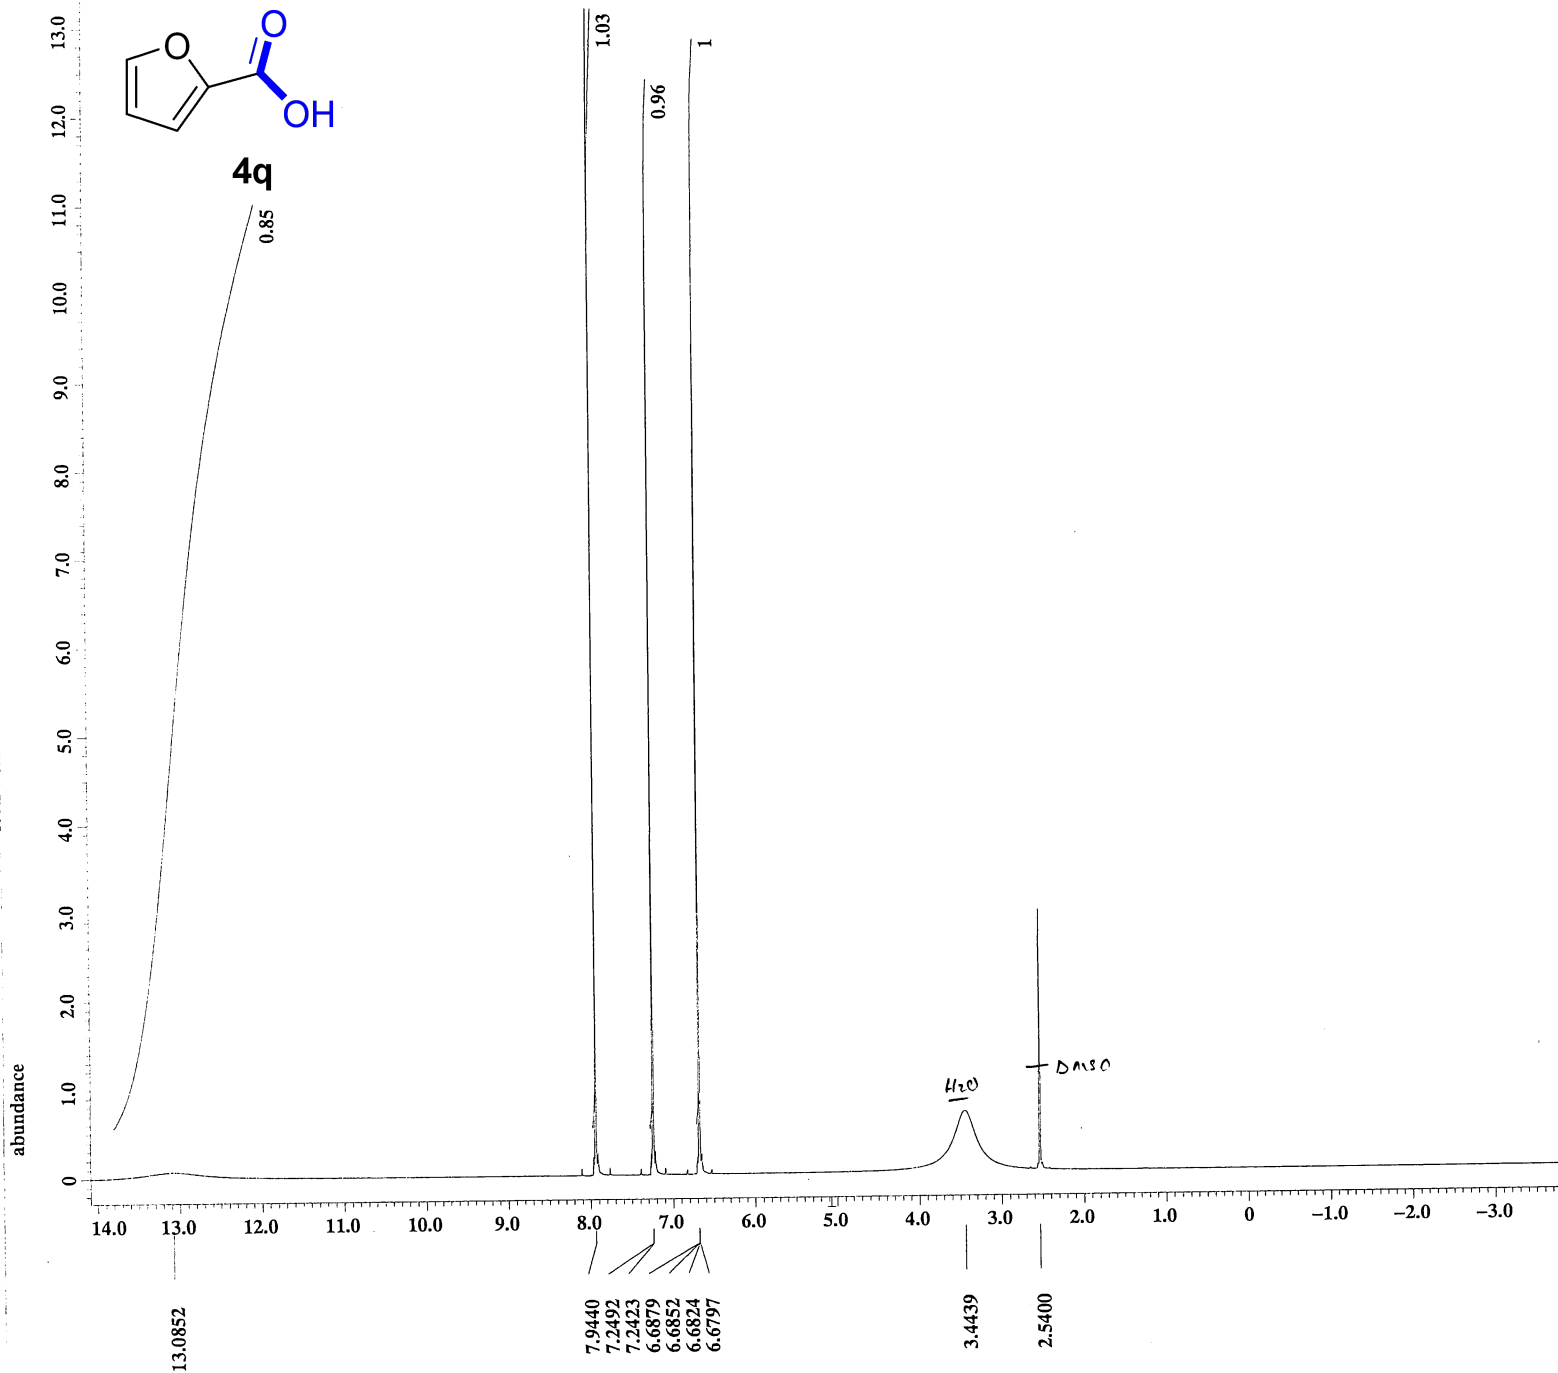

X : parts per Million : 1H

```

---- PROCESSING PARAMETERS ----
dc_balance : 0 : FALSE
sexp : 0.2[Hz] : 0.0[s]
trapezoid3 : 0[%] : 80[%] : 100[%]
zerofill : 1
fft : 1 : TRUE : TRUE
machinephase
ppm

```

Derived from: Exp-AB-R-124-13-H-1.jdf

```

Filename      = Exp-AB-R-124-13-H-5.j
Author       = delta
Experiment   = single_pulse.ex2
Sample_id    = Exp-AB-R-124-13-H
Solvent      = DMSO-D6
Creation_time = 31-AUG-2020 11:34:37
Revision_time = 31-AUG-2020 11:46:54
Current_time  = 31-AUG-2020 11:46:59

```

```

Comment      = Exp-AB-R-124-13-H
Data_format  = 1D COMPLEX
Dim_size     = 13107
Dim_title    = 1H
Dim_units    = [ppm]
Dimensions   = X
Site         = ECA 600
Spectrometer = DELTA2_NMR

```

```

Field_strength = 14.09636928[T] (600[M]
X_acq_duration = 1.21110528[s]
X_domain       = 1H
X_freq         = 600.1723046[MHz]
X_offset       = 5[ppm]
X_points       = 16384
X_prescans     = 1
X_resolution   = 0.82569205[Hz]
X_sweep        = 13.52813853[kHz]
Irr_domain     = 1H
Irr_freq       = 600.1723046[MHz]
Irr_offset     = 5[ppm]
Tri_domain     = 1H
Tri_freq       = 600.1723046[MHz]
Tri_offset     = 5[ppm]
Clipped        = FALSE
Mod_return     = 1
Scans          = 8
Total_scans    = 8

```

```

X_90_width    = 13.17[us]
X_acq_time     = 1.21110528[s]
X_angle        = 45[deg]
X_atn         = 3.4[dB]
X_pulse        = 6.585[us]
Irr_mode       = Off
Tri_mode       = Off
Dante_presat   = FALSE
Initial_wait   = 1[s]
Recvr_gain     = 48
Relaxation_delay = 5[s]
Repetition_time = 6.21110528[s]
Temp_get       = 21.4[dC]

```



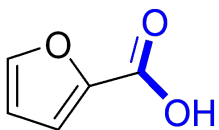

4q

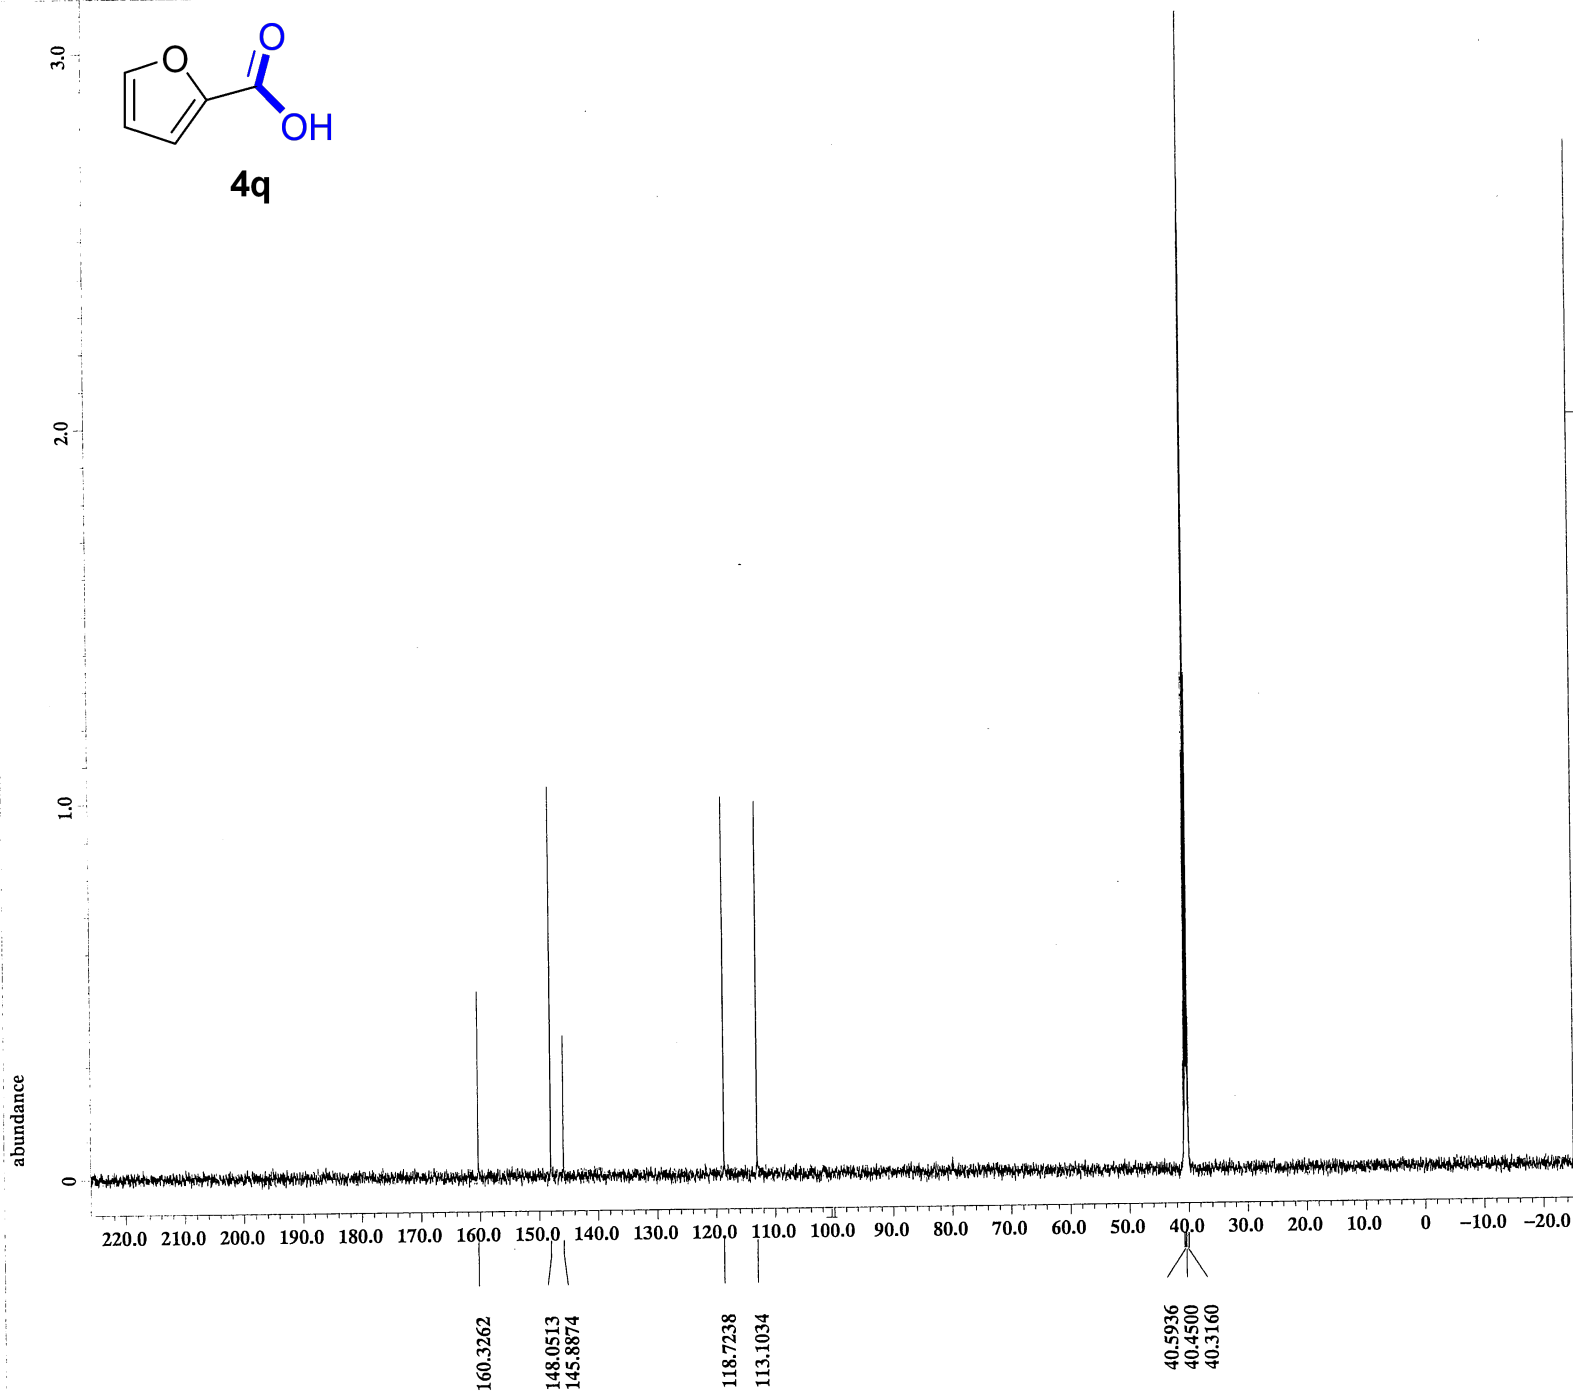

X : parts per Million : 13C

---- PROCESSING PARAMETERS ----  
 dc\_balance : 0 : FALSE  
 sexp : 2.0[Hz] : 0.0[s]  
 trapezoid3 : 0[%] : 80[%] : 100[%]  
 zerofill : 1  
 fft : 1 : TRUE : TRUE  
 machinephase  
 ppm

Derived from: Exp-AB-R-124-13-C-1.jdf

Filename = Exp-AB-R-124-13-C-3.j  
 Author = delta  
 Experiment = single\_pulse\_dec  
 Sample\_id = Exp-AB-R-124-13-C  
 Solvent = DMSO-D6  
 Creation\_time = 31-AUG-2020 11:38:39  
 Revision\_time = 31-AUG-2020 11:44:51  
 Current\_time = 31-AUG-2020 11:44:55

Comment = Exp-AB-R-124-13-C  
 Data\_format = 1D COMPLEX  
 Dim\_size = 26214  
 Dim\_title = 13C  
 Dim\_units = [ppm]  
 Dimensions = X  
 Site = ECA 600  
 Spectrometer = DELTA2\_NMR

Field\_strength = 14.09636928[T] (600[M]  
 X\_acq\_duration = 0.69206016[s]  
 X\_domain = 13C  
 X\_freq = 150.91343039[MHz]  
 X\_offset = 100[ppm]  
 X\_points = 32768  
 X\_prescans = 4  
 X\_resolution = 1.44496109[Hz]  
 X\_sweep = 47.34848485[kHz]  
 Irr\_domain = 1H  
 Irr\_freq = 600.1723046[MHz]  
 Irr\_offset = 5[ppm]  
 Clipped = FALSE  
 Mod\_return = 1  
 Scans = 74  
 Total\_scans = 74

X\_90\_width = 12.3[us]  
 X\_acq\_time = 0.69206016[s]  
 X\_angle = 30[deg]  
 X\_atn = 7.5[dB]  
 X\_pulse = 4.1[us]  
 Irr\_atn\_dec = 18.62[dB]  
 Irr\_atn\_noe = 18.62[dB]  
 Irr\_noise = WALTZ  
 Decoupling = TRUE  
 Initial\_wait = 1[s]  
 Noe = TRUE  
 Noe\_time = 2[s]  
 Recvr\_gain = 60  
 Relaxation\_delay = 2[s]  
 Repetition\_time = 2.69206016[s]  
 Temp\_get = 22.2[dc]

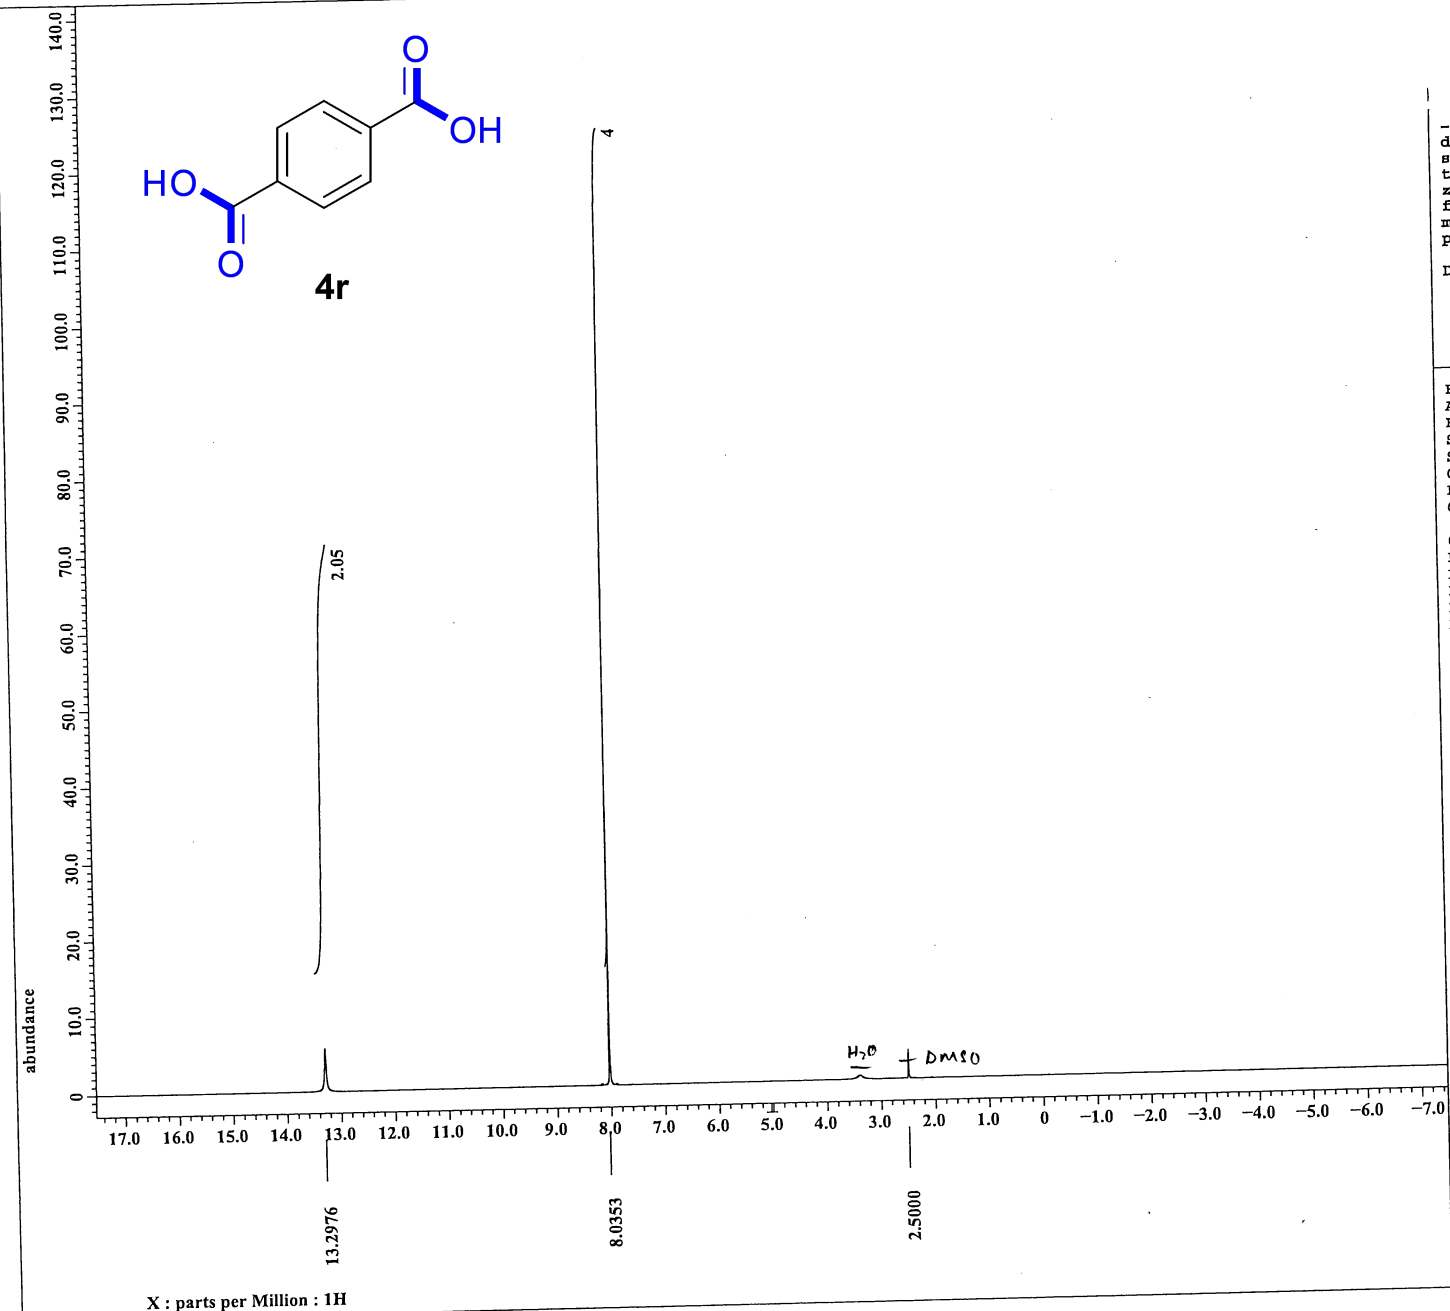

----- PROCESSING PARAMETERS -----  
 dc balance : 0 : FALSE  
 sexp : 0.2[Hz] : 0.0[s]  
 trapezoid3 : 0[%] : 80[%] : 100[%]  
 zerofill : 1  
 fft : 1 : TRUE : TRUE  
 machinephase  
 ppm

Derived from: Exp-R-182-1-diacid-P-1.jdf

```

Filename      = Exp-R-182-1-diacid-P-
Author       = delta
Experiment   = single_pulse.ex2
Sample_id    = Exp-R-182-1-diacid-P
Solvent      = DMSO-D6
Creation_time = 1-APR-2019 17:40:05
Revision_time = 1-APR-2019 17:46:46
Current_time  = 1-APR-2019 17:47:12

Comment      = Exp-R-182-1-diacid-P
Data_format  = 1D COMPLEX
Dim_size     = 13107
Dim_title    = 1H
Dim_units    = [ppm]
Dimensions   = X
Site         = ECA 600
Spectrometer = DELTA2_NMR

Field_strength = 14.09636928[T] (600[M
X_acq_duration = 0.87293952[s]
X_domain       = 1H
X_freq         = 600.1723046[MHz]
X_offset       = 5[ppm]
X_points       = 16384
X_prescans     = 1
X_resolution   = 1.14555473[Hz]
X_sweep        = 18.76876877[kHz]
Irr_domain     = 1H
Irr_freq       = 600.1723046[MHz]
Irr_offset     = 5[ppm]
Tri_domain     = 1H
Tri_freq       = 600.1723046[MHz]
Tri_offset     = 5[ppm]
Clipped        = FALSE
Mod_return     = 1
Scans          = 8
Total_scans    = 8

X_90_width    = 13.17[us]
X_acq_time    = 0.87293952[s]
X_angle       = 45[deg]
X_atn         = 3.4[dB]
X_pulse       = 6.585[us]
Irr_mode      = Off
Tri_mode      = Off
DanTe_preset  = FALSE
Initial_wait  = 1[s]
Recvr_gain    = 48
Relaxation_delay = 5[s]
Repetition_time = 5.87293952[s]
Temp_get      = 21.1[dC]
  
```

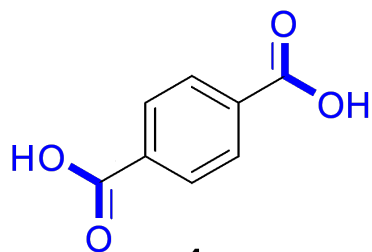

4r

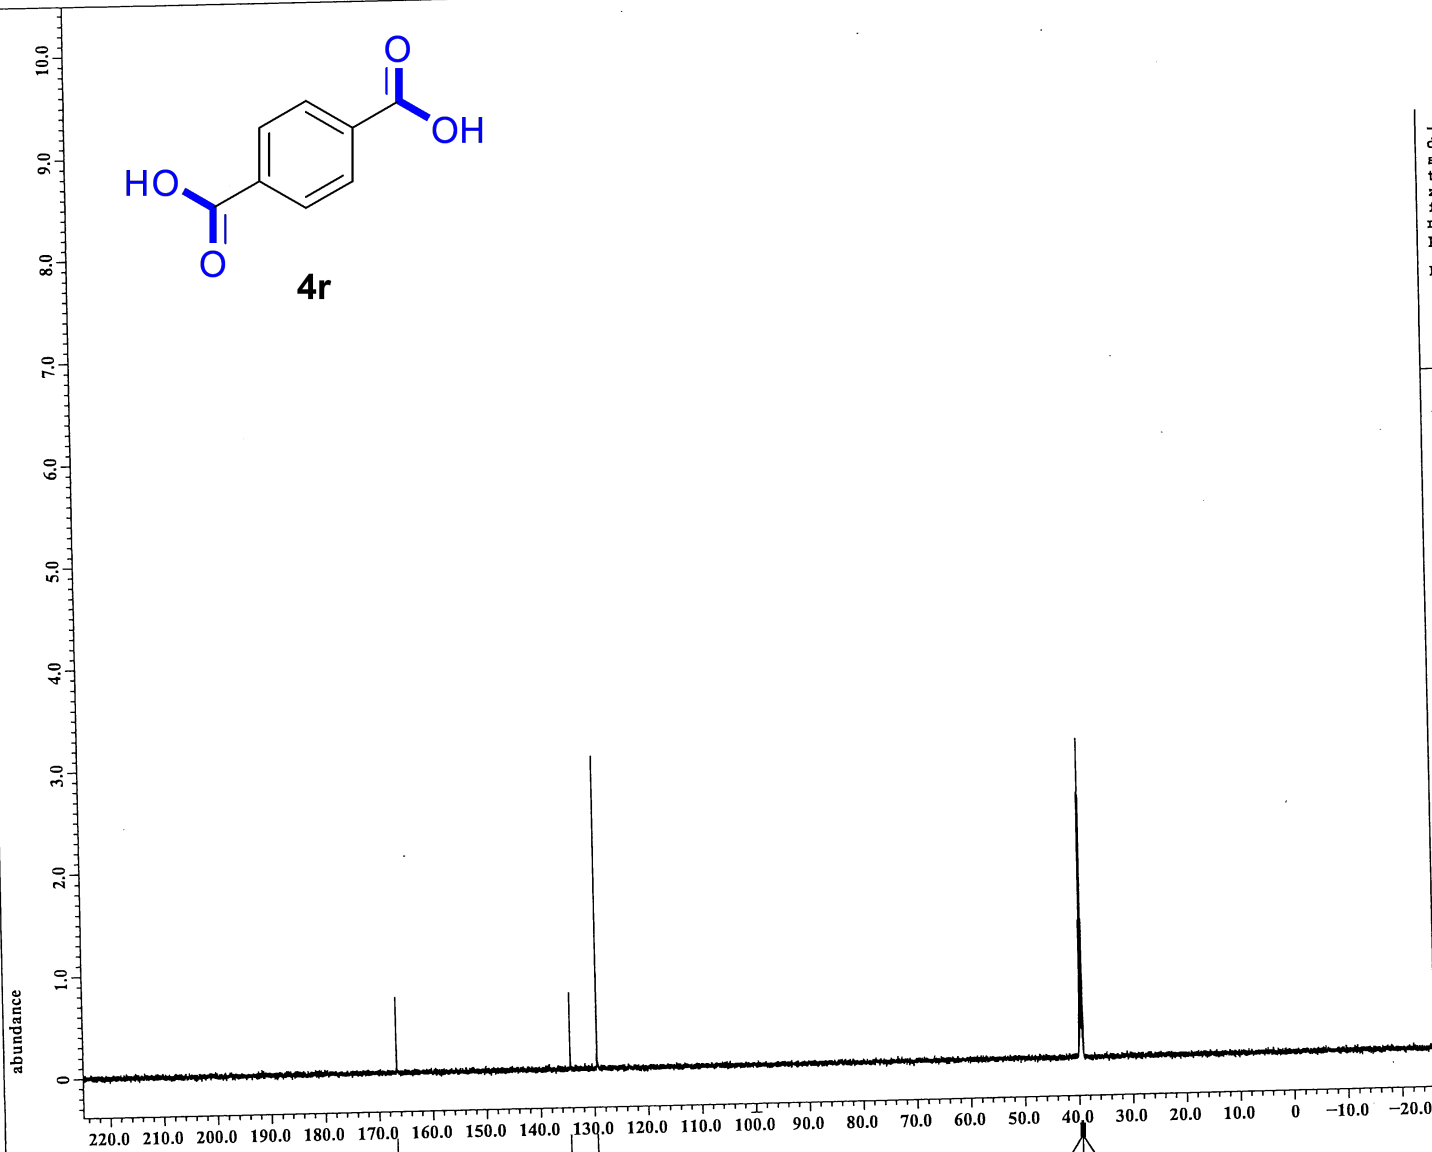

X : parts per Million : 13C

----- PROCESSING PARAMETERS -----  
 dc balance : 0 : FALSE  
 sexp : 2.0 [Hz] : 0.0 [s]  
 trapezoid3 : 0 [%] : 80 [%] : 100 [%]  
 zerofill : 1  
 fft : 1 : TRUE : TRUE  
 machinephase  
 ppm  
 Derived from: Exp-R-182-1-diacid-C-1.jdf

Filename = Exp-R-182-1-diacid-C-  
 Author = delta  
 Experiment = single\_pulse\_dec  
 Sample id = Exp-R-182-1-diacid-C  
 Solvent = DMSO-D6  
 Creation time = 1-APR-2019 17:42:43  
 Revision time = 1-APR-2019 17:47:55  
 Current time = 1-APR-2019 17:48:20

Comment = Exp-R-182-1-diacid-C  
 Data format = 1D COMPLEX  
 Dim\_size = 26214  
 Dim\_title = 13C  
 Dim\_units = [ppm]  
 Dimensions = X  
 Site = ECA 600  
 Spectrometer = DELTA2\_NMR

Field strength = 14.09636928 [T] (600 [M]  
 X\_acq\_duration = 0.69206016 [s]  
 X\_domain = 13C  
 X\_freq = 150.91343039 [MHz]  
 X\_offset = 100 [ppm]  
 X\_points = 32768  
 X\_prescans = 4  
 X\_resolution = 1.44496109 [Hz]  
 X\_sweep = 47.34848485 [kHz]  
 Irr\_domain = 1H  
 Irr\_freq = 600.1723046 [MHz]  
 Irr\_offset = 5 [ppm]  
 Clipped = FALSE  
 Mod\_return = 1  
 Scans = 43  
 Total\_scans = 43

X\_90\_width = 12.7 [us]  
 X\_acq\_time = 0.69206016 [s]  
 X\_angle = 30 [deg]  
 X\_atn = 7.5 [dB]  
 X\_pulse = 4.23333333 [us]  
 Irr\_atn\_dec = 18.62 [dB]  
 Irr\_atn\_noe = 18.62 [dB]  
 Irr\_noise = WALTZ  
 Decoupling = TRUE  
 Initial\_wait = 1 [s]  
 Noe = TRUE  
 Noe\_time = 2 [s]  
 Recvr\_gain = 60  
 Relaxation\_delay = 2 [s]  
 Repetition\_time = 2.69206016 [s]  
 Temp\_get = 21.6 [dC]
